# Supplementary material
Source: Research Square preprint supplement (doi:10.21203/rs.3.rs-10068981/v1)
Supplement: Supplementary file 1 [file 414d0f872cc9a04db036e32b.docx]

**Supplementary Material**

*Diversity, Nesting Ecology and Worker-level Morphometric Structure of Stingless Bees (Hymenoptera: Apidae: Meliponini) in the Bimodal Forest Zone of Cameroon*

Nsiyapnze Katte Yato Katte and Félix Meutchieye

This file contains three supplementary tables referenced in the main text: Table S1 (observed ranges and dispersion of all 24 worker traits), Table S2 (full principal-component loadings, PC1–PC5), and Table S3 (one-way ANOVA and Kruskal–Wallis statistics for the effect of locality on each of 23 traits). All values were computed from the raw morphometric dataset (*Hypotrigona gribodoi* n = 229; *Dactylurina staudingeri* n = 201), which is provided as a separate data file.

# Supplementary Table S1. Observed ranges and dispersion

Table S1. Minimum, maximum, mean, median, standard deviation (SD), coefficient of variation (CV %) and sample size (n) for each of 24 worker morphometric traits (mm; hamulus number is a count), by species. Forewing hamulus number was invariant in *H. gribodoi* (5.00), giving SD = 0 and CV = 0.

***Hypotrigona gribodoi (n = 229)***

| **Trait** | **Min** | **Max** | **Mean** | **Median** | **SD** | **CV %** | **n** |
| --- | --- | --- | --- | --- | --- | --- | --- |
| Body length | 1.29 | 3.65 | 2.74 | 2.79 | 0.328 | 12.0 | 229 |
| Abdomen length | 0.49 | 2.09 | 1.25 | 1.25 | 0.250 | 20.1 | 229 |
| Thorax length | 0.11 | 3.13 | 1.07 | 1.08 | 0.232 | 21.7 | 229 |
| Forewing length | 0.48 | 1.50 | 1.02 | 1.04 | 0.158 | 15.5 | 229 |
| Forewing width | 0.78 | 1.50 | 1.16 | 1.17 | 0.131 | 11.3 | 229 |
| Antenna length | 0.82 | 1.98 | 1.42 | 1.34 | 0.333 | 23.4 | 229 |
| Hindwing length | 0.25 | 3.59 | 2.45 | 2.60 | 0.536 | 21.9 | 229 |
| Hindwing width | 0.25 | 1.22 | 0.99 | 1.02 | 0.152 | 15.4 | 229 |
| Head length | 0.24 | 2.68 | 1.89 | 1.86 | 0.469 | 24.8 | 229 |
| Head width | 0.33 | 0.96 | 0.61 | 0.61 | 0.124 | 20.5 | 229 |
| Femur length | 0.54 | 1.19 | 0.78 | 0.76 | 0.112 | 14.4 | 229 |
| Tibia length | 0.38 | 1.19 | 0.91 | 0.91 | 0.104 | 11.4 | 229 |
| Tibia width | 0.15 | 0.52 | 0.33 | 0.34 | 0.060 | 18.3 | 229 |
| Metatarsus length | 0.24 | 0.68 | 0.44 | 0.42 | 0.080 | 18.3 | 229 |
| Metatarsus width | 0.10 | 0.79 | 0.20 | 0.19 | 0.052 | 26.3 | 229 |
| Ocello-dorsal dist. | 0.18 | 2.28 | 0.29 | 0.28 | 0.138 | 47.8 | 229 |
| Ocello-ocular dist. | 0.11 | 0.34 | 0.21 | 0.20 | 0.050 | 23.4 | 229 |
| 1st tergite width | 0.19 | 0.56 | 0.35 | 0.34 | 0.081 | 23.4 | 229 |
| 2nd tergite width | 0.16 | 0.44 | 0.28 | 0.28 | 0.051 | 17.9 | 229 |
| 3rd tergite width | 0.16 | 0.77 | 0.25 | 0.24 | 0.052 | 21.0 | 229 |
| 4th tergite width | 0.12 | 0.68 | 0.37 | 0.28 | 0.172 | 46.6 | 229 |
| Comp.-eye length | 0.49 | 1.04 | 0.76 | 0.77 | 0.129 | 17.0 | 229 |
| Comp.-eye width | 0.14 | 0.99 | 0.24 | 0.22 | 0.081 | 33.3 | 229 |
| Forewing hamuli (n) | 5.00 | 5.00 | 5.00 | 5.00 | 0.000 | 0.0 | 229 |

***Dactylurina staudingeri (n = 201)***

| **Trait** | **Min** | **Max** | **Mean** | **Median** | **SD** | **CV %** | **n** |
| --- | --- | --- | --- | --- | --- | --- | --- |
| Body length | 2.56 | 6.97 | 5.66 | 5.65 | 0.657 | 11.6 | 201 |
| Abdomen length | 1.52 | 4.14 | 3.26 | 3.15 | 0.408 | 12.5 | 201 |
| Thorax length | 0.57 | 1.98 | 1.54 | 1.56 | 0.263 | 17.0 | 201 |
| Forewing length | 0.64 | 4.43 | 1.55 | 1.44 | 0.480 | 31.0 | 201 |
| Forewing width | 0.78 | 3.45 | 1.98 | 1.89 | 0.477 | 24.1 | 201 |
| Antenna length | 0.57 | 3.15 | 2.06 | 1.98 | 0.595 | 28.9 | 201 |
| Hindwing length | 1.74 | 6.96 | 4.40 | 4.55 | 0.685 | 15.6 | 201 |
| Hindwing width | 0.45 | 2.88 | 1.46 | 1.60 | 0.411 | 28.2 | 201 |
| Head length | 1.19 | 4.98 | 3.31 | 3.33 | 0.442 | 13.3 | 201 |
| Head width | 0.32 | 1.64 | 0.85 | 0.81 | 0.215 | 25.2 | 201 |
| Femur length | 0.79 | 2.16 | 1.46 | 1.37 | 0.223 | 15.2 | 201 |
| Tibia length | 0.75 | 2.10 | 1.78 | 1.87 | 0.239 | 13.4 | 201 |
| Tibia width | 0.30 | 0.85 | 0.64 | 0.64 | 0.102 | 15.9 | 201 |
| Metatarsus length | 0.25 | 0.97 | 0.70 | 0.60 | 0.961 | 137.6 | 201 |
| Metatarsus width | 0.14 | 0.62 | 0.34 | 0.34 | 0.088 | 25.9 | 201 |
| Ocello-dorsal dist. | 0.18 | 0.77 | 0.41 | 0.39 | 0.099 | 24.3 | 201 |
| Ocello-ocular dist. | 0.11 | 0.58 | 0.38 | 0.37 | 0.076 | 19.9 | 201 |
| 1st tergite width | 0.41 | 1.88 | 0.96 | 0.92 | 0.209 | 21.8 | 201 |
| 2nd tergite width | 0.38 | 1.58 | 0.89 | 0.88 | 0.166 | 18.6 | 201 |
| 3rd tergite width | 0.30 | 1.22 | 0.70 | 0.68 | 0.161 | 23.0 | 201 |
| 4th tergite width | 0.20 | 1.80 | 0.54 | 0.55 | 0.180 | 33.0 | 201 |
| Comp.-eye length | 0.23 | 1.86 | 1.18 | 1.14 | 0.342 | 29.0 | 201 |
| Comp.-eye width | 0.20 | 1.90 | 0.41 | 0.36 | 0.227 | 54.9 | 201 |
| Forewing hamuli (n) | 6.00 | 7.00 | 6.61 | 7.00 | 0.489 | 7.4 | 201 |

# Supplementary Table S2. Full PCA loadings (PC1–PC5)

Table S2. Standardised loadings (trait–component correlations) on the first five principal components from correlation-matrix PCA of 23 standardised traits, by species. The bottom row gives the percentage of total variance explained by each component. Hamulus number was excluded from PCA scaling owing to near-zero variance.

***Hypotrigona gribodoi***

| **Trait** | **PC1** | **PC2** | **PC3** | **PC4** | **PC5** |
| --- | --- | --- | --- | --- | --- |
| Body length | 0.508 | -0.236 | -0.452 | 0.282 | 0.280 |
| Abdomen length | 0.472 | -0.579 | -0.092 | 0.201 | 0.264 |
| Thorax length | 0.255 | 0.443 | -0.307 | 0.350 | -0.050 |
| Forewing length | 0.643 | 0.250 | 0.071 | 0.013 | -0.087 |
| Forewing width | 0.710 | 0.093 | -0.174 | 0.256 | -0.086 |
| Antenna length | 0.807 | 0.288 | -0.115 | -0.245 | -0.042 |
| Hindwing length | 0.599 | 0.456 | 0.250 | -0.149 | 0.063 |
| Hindwing width | 0.656 | -0.250 | 0.232 | -0.142 | 0.163 |
| Head length | 0.857 | 0.113 | -0.042 | -0.233 | -0.016 |
| Head width | 0.680 | -0.300 | -0.087 | -0.054 | 0.204 |
| Femur length | -0.435 | 0.204 | -0.373 | 0.445 | -0.324 |
| Tibia length | 0.529 | 0.223 | -0.328 | 0.241 | -0.457 |
| Tibia width | 0.236 | 0.738 | 0.188 | -0.018 | -0.113 |
| Metatarsus length | 0.501 | -0.502 | -0.327 | 0.018 | -0.156 |
| Metatarsus width | 0.246 | -0.381 | -0.166 | 0.146 | -0.121 |
| Ocello-dorsal dist. | 0.132 | 0.067 | 0.149 | 0.409 | 0.540 |
| Ocello-ocular dist. | 0.123 | 0.333 | 0.188 | 0.347 | 0.282 |
| 1st tergite width | 0.563 | -0.564 | 0.255 | 0.138 | -0.101 |
| 2nd tergite width | 0.339 | -0.216 | 0.639 | 0.280 | -0.329 |
| 3rd tergite width | 0.285 | -0.333 | 0.507 | 0.265 | -0.377 |
| 4th tergite width | 0.813 | 0.310 | -0.013 | -0.077 | -0.026 |
| Comp.-eye length | 0.804 | 0.279 | 0.012 | -0.058 | 0.126 |
| Comp.-eye width | -0.229 | 0.350 | 0.264 | 0.487 | 0.213 |
| Variance explained (%) | 29.6 | 13.1 | 7.6 | 6.3 | 5.6 |

***Dactylurina staudingeri***

| **Trait** | **PC1** | **PC2** | **PC3** | **PC4** | **PC5** |
| --- | --- | --- | --- | --- | --- |
| Body length | 0.657 | 0.229 | 0.397 | -0.128 | -0.270 |
| Abdomen length | 0.628 | 0.364 | 0.132 | -0.103 | -0.411 |
| Thorax length | 0.211 | 0.264 | 0.470 | 0.004 | -0.222 |
| Forewing length | 0.844 | -0.190 | -0.083 | 0.281 | 0.171 |
| Forewing width | 0.873 | -0.306 | 0.116 | 0.134 | 0.017 |
| Antenna length | 0.736 | -0.471 | 0.242 | 0.085 | 0.109 |
| Hindwing length | 0.801 | 0.055 | -0.253 | 0.128 | 0.139 |
| Hindwing width | 0.689 | -0.232 | -0.190 | -0.074 | 0.048 |
| Head length | 0.273 | 0.300 | 0.628 | 0.275 | 0.130 |
| Head width | 0.038 | 0.284 | 0.769 | 0.376 | 0.113 |
| Femur length | 0.223 | 0.728 | -0.275 | 0.012 | -0.205 |
| Tibia length | 0.536 | 0.398 | -0.289 | -0.100 | 0.081 |
| Tibia width | 0.429 | 0.534 | -0.494 | 0.072 | 0.120 |
| Metatarsus length | 0.368 | 0.180 | 0.074 | 0.633 | 0.487 |
| Metatarsus width | 0.139 | 0.747 | -0.341 | 0.335 | -0.075 |
| Ocello-dorsal dist. | 0.698 | -0.252 | -0.154 | 0.153 | -0.246 |
| Ocello-ocular dist. | 0.783 | -0.214 | -0.086 | -0.030 | -0.174 |
| 1st tergite width | 0.360 | 0.052 | 0.269 | -0.539 | 0.162 |
| 2nd tergite width | 0.537 | -0.006 | 0.090 | -0.590 | 0.015 |
| 3rd tergite width | 0.351 | 0.387 | 0.274 | -0.305 | -0.158 |
| 4th tergite width | 0.204 | 0.270 | -0.027 | -0.505 | 0.488 |
| Comp.-eye length | 0.788 | -0.383 | -0.182 | 0.016 | -0.045 |
| Comp.-eye width | 0.132 | 0.208 | 0.076 | -0.325 | 0.560 |
| Variance explained (%) | 30.6 | 12.6 | 10.0 | 8.7 | 6.0 |

# Supplementary Table S3. Locality effect (ANOVA and Kruskal–Wallis)

Table S3. One-way ANOVA and Kruskal–Wallis (KW) statistics for the effect of locality on each of 23 morphometric traits, by species. F = ANOVA F-ratio; df1, df2 = degrees of freedom; η² = eta-squared effect size (proportion of variance explained by locality); KW H = Kruskal–Wallis H statistic. Forewing hamulus number was invariant in *H. gribodoi* and is omitted. Tukey HSD / Games-Howell post-hoc groupings are provided in the dataset.

***Hypotrigona gribodoi (n = 229)***

| **Trait** | **F** | **df1** | **df2** | **p (ANOVA)** | **η²** | **KW H** | **p (KW)** |
| --- | --- | --- | --- | --- | --- | --- | --- |
| Body length | 9.71 | 4 | 224 | <0.001 | 0.148 | 34.76 | <0.001 |
| Abdomen length | 8.69 | 4 | 224 | <0.001 | 0.134 | 28.89 | <0.001 |
| Thorax length | 5.03 | 4 | 224 | <0.001 | 0.082 | 26.09 | <0.001 |
| Forewing length | 9.08 | 4 | 224 | <0.001 | 0.139 | 44.28 | <0.001 |
| Forewing width | 8.03 | 4 | 224 | <0.001 | 0.125 | 38.64 | <0.001 |
| Antenna length | 30.44 | 4 | 224 | <0.001 | 0.352 | 76.28 | <0.001 |
| Hindwing length | 20.90 | 4 | 224 | <0.001 | 0.272 | 82.65 | <0.001 |
| Hindwing width | 9.36 | 4 | 224 | <0.001 | 0.143 | 25.49 | <0.001 |
| Head length | 26.60 | 4 | 224 | <0.001 | 0.322 | 81.91 | <0.001 |
| Head width | 22.02 | 4 | 224 | <0.001 | 0.282 | 66.21 | <0.001 |
| Femur length | 2.67 | 4 | 224 | 0.033 | 0.045 | 10.83 | 0.029 |
| Tibia length | 7.45 | 4 | 224 | <0.001 | 0.117 | 37.12 | <0.001 |
| Tibia width | 24.29 | 4 | 224 | <0.001 | 0.303 | 55.93 | <0.001 |
| Metatarsus length | 9.38 | 4 | 224 | <0.001 | 0.143 | 41.81 | <0.001 |
| Metatarsus width | 0.80 | 4 | 224 | 0.529 | 0.014 | 21.05 | <0.001 |
| Ocello-dorsal dist. | 0.84 | 4 | 224 | 0.504 | 0.015 | 31.60 | <0.001 |
| Ocello-ocular dist. | 6.81 | 4 | 224 | <0.001 | 0.108 | 31.51 | <0.001 |
| 1st tergite width | 6.80 | 4 | 224 | <0.001 | 0.108 | 27.46 | <0.001 |
| 2nd tergite width | 0.65 | 4 | 224 | 0.626 | 0.012 | 4.96 | 0.291 |
| 3rd tergite width | 0.51 | 4 | 224 | 0.728 | 0.009 | 2.17 | 0.704 |
| 4th tergite width | 47.79 | 4 | 224 | <0.001 | 0.460 | 83.49 | <0.001 |
| Comp.-eye length | 23.85 | 4 | 224 | <0.001 | 0.299 | 74.60 | <0.001 |
| Comp.-eye width | 1.88 | 4 | 224 | 0.115 | 0.032 | 7.38 | 0.117 |

***Dactylurina staudingeri (n = 201)***

| **Trait** | **F** | **df1** | **df2** | **p (ANOVA)** | **η²** | **KW H** | **p (KW)** |
| --- | --- | --- | --- | --- | --- | --- | --- |
| Body length | 4.29 | 4 | 196 | 0.002 | 0.080 | 14.29 | 0.006 |
| Abdomen length | 3.39 | 4 | 196 | 0.010 | 0.065 | 18.85 | <0.001 |
| Thorax length | 2.72 | 4 | 196 | 0.031 | 0.053 | 14.18 | 0.007 |
| Forewing length | 2.05 | 4 | 196 | 0.089 | 0.040 | 5.74 | 0.219 |
| Forewing width | 7.69 | 4 | 196 | <0.001 | 0.136 | 23.99 | <0.001 |
| Antenna length | 45.99 | 4 | 196 | <0.001 | 0.484 | 99.78 | <0.001 |
| Hindwing length | 6.24 | 4 | 196 | <0.001 | 0.113 | 21.05 | <0.001 |
| Hindwing width | 11.78 | 4 | 196 | <0.001 | 0.194 | 33.80 | <0.001 |
| Head length | 5.74 | 4 | 196 | <0.001 | 0.105 | 14.53 | 0.006 |
| Head width | 6.75 | 4 | 196 | <0.001 | 0.121 | 31.74 | <0.001 |
| Femur length | 14.26 | 4 | 196 | <0.001 | 0.225 | 36.42 | <0.001 |
| Tibia length | 2.97 | 4 | 196 | 0.021 | 0.057 | 9.73 | 0.045 |
| Tibia width | 6.15 | 4 | 196 | <0.001 | 0.112 | 25.32 | <0.001 |
| Metatarsus length | 4.69 | 4 | 196 | 0.001 | 0.087 | 17.27 | 0.002 |
| Metatarsus width | 10.51 | 4 | 196 | <0.001 | 0.177 | 36.78 | <0.001 |
| Ocello-dorsal dist. | 3.18 | 4 | 196 | 0.015 | 0.061 | 7.76 | 0.101 |
| Ocello-ocular dist. | 1.39 | 4 | 196 | 0.237 | 0.028 | 6.96 | 0.138 |
| 1st tergite width | 3.21 | 4 | 196 | 0.014 | 0.061 | 11.41 | 0.022 |
| 2nd tergite width | 3.25 | 4 | 196 | 0.013 | 0.062 | 8.47 | 0.076 |
| 3rd tergite width | 4.19 | 4 | 196 | 0.003 | 0.079 | 19.30 | <0.001 |
| 4th tergite width | 3.82 | 4 | 196 | 0.005 | 0.072 | 35.05 | <0.001 |
| Comp.-eye length | 4.18 | 4 | 196 | 0.003 | 0.079 | 29.20 | <0.001 |
| Comp.-eye width | 0.85 | 4 | 196 | 0.493 | 0.017 | 37.92 | <0.001 |
