# Supplementary material
Source: Research Square preprint supplement (doi:10.21203/rs.3.rs-10068981/v1)
Supplement: Supplementary file 2 [file e345dcbbf9860a2c299b3938.xlsx]

## Sheet: Dactylurina
Locality	LoCo	LoAb	LoThx	LoT	LaT	LoAn	LoAA	LaAA	LoAP	LaAP	LoF	LoTi	LaTi	LoM	LaM	DoD	DooD	La1T	La2T	La3T	La4T	LoYc	LaYc	NC	Cluster
Nkometou	5.76	3.05	1.908	0.9	1.24	1.85	3.19	0.78	3.83	1.26	1.31	1.45	0.48	0.4	0.28	0.27	0.33	0.944	0.8	0.7	0.365	0.65	0.31	7	1
Nkometou	5.72	3.06	1.888	1.02	1.6	1.82	3.28	0.78	3.84	1.25	1.35	1.52	0.53	0.51	0.26	0.38	0.33	0.994	0.75	0.77	0.363	0.6	0.33	7	1
Nkometou	5.68	3.07	1.874	0.88	1.55	1.86	3.29	0.79	3.83	1.27	1.29	1.6	0.63	0.5	0.29	0.32	0.34	0.822	0.79	0.69	0.362	0.62	0.3	7	1
Nkometou	5.64	3.04	1.861	0.94	1.51	1.81	3.26	0.77	3.84	1.27	1.34	1.55	0.55	0.53	0.3	0.21	0.14	0.912	0.8	0.69	0.358	0.65	0.35	7	1
Nkometou	5.58	3.31	1.841	0.91	1.58	1.82	3.27	0.8	3.85	1.26	1.35	1.59	0.58	0.48	0.37	0.23	0.111	0.949	0.84	0.75	0.349	0.64	0.31	7	1
Nkometou	5.72	3.27	1.887	0.91	1.58	1.8	3.28	0.75	3.84	1.25	1.34	1.57	0.55	0.51	0.38	0.42	0.35	0.822	0.78	0.6	0.321	0.72	0.31	7	1
Nkometou	5.72	3.26	1.886	0.95	1.58	1.75	3.25	0.8	3.87	1.29	1.36	1.54	0.48	0.55	0.38	0.3	0.27	0.921	0.81	0.73	0.329	0.69	0.33	6	1
Nkometou	5.66	3.03	1.868	1	1.5	1.87	3.27	0.81	3.87	1.29	1.27	1.42	0.45	0.49	0.27	0.45	0.4	0.908	0.78	0.67	0.316	0.66	0.36	6	1
Nkometou	5.78	3.12	1.907	0.95	1.56	1.82	3.26	0.78	3.87	1.24	1.33	1.53	0.52	0.46	0.34	0.36	0.32	0.984	0.75	0.66	0.347	0.67	0.35	7	1
Nkometou	5.78	3.08	1.904	0.86	1.55	1.86	3.29	0.77	3.86	1.28	1.33	1.52	0.55	0.51	0.32	0.35	0.33	0.948	0.74	0.68	0.339	0.68	0.39	7	1
Nkometou	5.6	3.06	1.848	1.41	1.9	2.15	4.42	1.7	3.34	0.82	1.331	1.86	0.58	0.62	0.33	0.35	0.33	0.981	0.84	0.69	0.383	1.08	0.33	6	2
Nkometou	5.58	2.82	1.841	1.39	1.94	2.16	4	1.18	3.32	0.72	1.342	1.87	0.52	0.66	0.22	0.38	0.39	0.9	0.92	0.62	0.242	1.24	0.22	6	2
Nkometou	5.6	3.06	1.845	1.42	1.9	2.18	3.84	1.26	3.4	0.8	1.37	1.863	0.63	0.58	0.24	0.32	0.36	1.704	1.11	0.66	1.101	1.19	1.2	6	2
Nkometou	5.6	3.06	1.878	1.43	1.88	2.22	3.86	1.34	3.412	0.79	1.39	1.896	0.66	0.7	0.18	0.321	0.365	1.664	1.211	0.675	1.799	1.17	1.89	6	2
Nkometou	5.56	3	1.835	1.38	1.95	2.2	3.98	1.66	3.3	0.83	1.28	1.9	0.55	0.62	0.25	0.368	0.38	0.908	0.9	0.6	0.197	1.14	0.23	6	2
Nkometou	5.52	2.92	1.822	1.36	1.85	2.1	4.12	1.76	3.26	0.822	1.333	1.892	0.48	0.6	0.22	0.34	0.36	0.922	0.89	0.87	0.385	1.26	0.45	6	2
Nkometou	5.68	3.02	1.844	1.45	1.97	2.2	4.44	1.76	3.42	0.92	1.44	1.92	0.65	0.63	0.335	0.36	0.34	0.98	0.86	0.72	0.334	1.11	0.34	6	2
Nkometou	5.58	2.96	1.814	1.4	1.95	2.14	4.78	1.22	3.37	0.84	1.38	1.86	0.61	0.65	0.24	0.365	0.35	0.729	0.72	0.89	0.331	1.3	0.31	6	2
Nkometou	5.64	3.08	1.861	1.44	1.92	2.2	4.8	1.06	3.38	0.9	1.45	1.91	0.63	0.59	0.28	0.312	0.358	0.792	0.714	0.659	1.187	1.12	1.178	6	2
Nkometou	5.52	2.98	1.822	1.35	1.86	2.08	4.76	1.16	3.36	0.831	1.22	1.88	0.51	0.62	0.19	0.343	0.377	0.9	0.912	0.559	0.255	1.137	0.25	6	2
Nkometou	5.56	3.752	1.843	1.436	1.956	1.928	4.324	2.39	3.2	1.34	1.554	1.874	0.648	0.666	0.324	0.444	0.324	0.73	0.68	1.026	0.348	1.174	0.338	6	2
Nkometou	5.48	3.59	1.808	1.436	1.924	2.012	4.982	1.716	3.342	0.722	1.656	1.94	0.664	0.37	0.37	0.424	0.374	0.925	0.946	0.832	0.302	1.38	0.298	7	2
Nkometou	5.52	3.356	1.822	1.46	1.8869	1.954	4.99	1.607	3.324	0.901	1.641	2.016	0.743	0.677	0.411	0.382	0.389	0.908	0.891	0.955	0.394	1.264	0.394	7	2
Nkometou	5.64	2.98	1.974	1.41	1.93	2.16	4.4	1.72	3.38	0.88	1.4	1.88	0.61	0.59	0.305	0.364	0.361	0.912	0.82	0.68	0.308	1.07	0.3	7	2
Nkometou	5.52	3.36	1.932	1.465	1.87	1.94	4.88	1.569	3.342	1.01	1.638	1.966	0.77	0.682	0.4	0.392	0.379	0.921	0.788	0.845	0.354	1.261	0.349	6	2
Nkometou	5.56	3.025	1.946	1.403	1.955	2.222	4.002	1.683	3.32	0.85	1.305	1.927	0.574	0.648	0.42	0.396	0.38	0.922	0.92	0.72	0.242	1.2	0.2	7	2
Nkometou	5.56	3.527	1.964	1.463	1.965	1.982	4.432	2.23	3.32	1.11	1.35	1.887	0.684	0.688	0.388	0.454	0.334	0.982	0.88	1.031	0.343	1.21	0.34	6	2
Nkometou	5.64	3.825	1.974	1.406	1.845	2.15	4.782	1.82	3.41	0.93	1.681	1.952	0.538	0.538	0.344	0.337	0.349	1.875	0.847	0.621	0.385	1.094	0.395	7	2
Nkometou	5.5	3.165	1.925	1.448	1.897	1.983	4.986	1.66	3.333	0.813	1.65	1.978	0.523	0.523	0.391	0.418	0.393	0.985	0.93	0.893	0.358	1.201	0.348	7	2
Nkometou	6.32	3.9	1.212	2.372	2.806	3.004	4.94	1.84	3.34	0.82	1.33	1.86	0.62	0.62	0.33	0.636	0.53	1.064	1.438	1.222	0.392	1.742	0.382	6	3
Nkometou	6.26	3.8	1.191	2.42	2.852	3.026	4.98	1.88	3.28	0.9	1.34	1.88	0.61	0.66	0.26	0.588	0.536	0.988	1.266	0.838	0.426	1.624	0.406	6	3
Nkometou	6.26	3.88	1.878	2.41	2.776	3.038	5.02	1.88	3.38	0.84	1.37	1.9	0.61	0.5	0.26	0.568	0.516	1.604	1.474	1.16	0.378	1.748	0.368	6	3
Nkometou	6.38	3.86	1.914	2.13	2.852	3.028	4.48	1.96	3.38	0.88	1.42	1.92	0.63	0.63	0.38	0.512	0.496	0.963	0.938	0.612	0.444	1.74	0.444	6	3
Nkometou	6.14	3.94	1.84	2.216	2.842	2.94	4.94	1.74	3.36	0.85	1.35	0.75	0.5	0.54	0.14	0.424	0.426	0.997	0.942	0.62	0.488	1.702	0.484	6	3
Nkometou	6.18	3.66	1.854	2.086	2.846	2.85	4.92	1.64	3.11	0.83	1.3	0.79	0.52	0.58	0.18	0.568	0.44	0.968	0.882	0.648	0.427	1.6	0.424	6	3
Nkometou	6.3	3.76	1.89	2.16	2.862	2.99	5.04	1.76	3.3	0.79	1.36	1.9	0.6	0.6	0.3	0.502	0.452	1.406	1.012	0.6	0.328	1.632	0.318	6	3
Nkometou	6.24	3.72	1.331	2.15	2.824	3.018	4.94	1.86	3.35	0.83	1.34	1.82	0.57	0.44	0.24	0.57	0.484	0.995	0.88	0.578	0.444	1.674	0.444	6	3
Nkometou	6.2	3.46	1.294	2.104	2.824	2.957	4.72	1.86	3.22	0.71	1.29	1.8	0.54	0.42	0.2	0.53	0.504	0.778	0.68	0.596	0.401	1.689	0.401	6	3
Nkometou	6.22	3.52	1.426	2.216	2.842	2.896	4.68	1.82	3.33	0.81	1.32	1.78	0.55	0.46	0.22	0.444	0.54	0.888	0.85	0.705	0.358	1.704	0.358	6	3
Nkometou	5.81	3.15	1.266	1.44	1.622	2.074	4.842	1.672	3.334	0.618	1.302	1.908	0.62	0.552	0.354	0.38	0.356	0.802	0.792	0.558	0.232	1.174	0.232	7	2
Nkometou	5.301	3.046	1.067	1.422	1.874	1.918	4.34	1.466	3.06	0.838	1.206	1.678	0.568	0.536	0.212	0.262	0.374	1.46	1.112	0.674	0.541	1.09	0.29	7	2
Nkometou	5.918	3.078	1.308	1.356	1.89	1.81	4.792	1.558	2.42	0.672	1.272	1.974	0.814	0.612	0.388	0.33	0.332	1.857	1.58	0.78	0.642	1.11	0.272	6	2
Nkometou	5.554	3.112	1.166	1.406	1.832	2.046	4.788	1.814	3.62	0.702	1.34	1.886	0.712	0.618	0.42	0.386	0.39	0.983	0.916	0.616	0.468	1.194	0.232	6	2
Nkometou	5.646	3.75	1.202	1.406	1.842	1.48	4.8	1.66	2.36	0.708	1.28	1.862	0.694	0.58	0.344	0.312	0.356	0.925	1.112	0.654	0.592	1.18	0.198	6	2
Nkometou	5.54	3.55	1.166	1.434	1.92	2.12	4.358	1.658	4.956	0.89	1.51	1.95	0.667	0.68	0.41	0.394	0.375	0.908	0.795	0.808	0.712	0.23	0.306	7	2
Nkometou	5.44	3.16	1.122	2.372	2.806	3.004	4.6	1.46	3.222	0.495	1.274	1.932	0.702	0.642	0.37	0.636	0.53	0.912	0.892	0.386	0.401	1.742	0.375	6	2
Nkometou	5.52	2.92	1.153	1.752	1.888	3.026	4.7	1.5	3.342	0.72	1.59	1.941	0.721	0.664	0.37	0.536	0.374	0.921	1	0.99	0.918	0.536	0.337	6	2
Nkometou	5.26	3.14	1.051	1.756	1.926	3.051	4.46	1.34	3.07	0.79	1.432	1.916	0.711	0.653	0.3	0.404	0.34	0.922	0.941	0.694	0.588	1.14	0.357	6	2
Nkometou	5.32	3.04	1.075	1.602	1.887	3.057	4.35	1.5	3.226	0.774	1.588	1.991	0.773	0.654	0.3	0.651	0.365	0.982	0.887	0.307	0.351	1.75	0.3	6	2
Nkometou	5.38	3.11	1.082	1.419	1.881	2.974	5.08	1.54	3.717	1.237	1.52	1.981	0.717	0.651	0.302	0.689	0.463	0.956	0.99	0.446	0.494	1.774	0.318	6	2
Nkometou	5.52	3.18	1.153	1.607	1.818	3.075	4.82	1.6	3.311	0.75	1.545	1.992	0.718	0.622	0.318	0.67	0.338	0.875	0.83	0.392	0.336	1.73	0.307	6	2
Nkometou	5.38	3.16	1.098	2.349	2.853	3.044	4.06	1.44	3.21	0.484	1.21	1.972	0.75	0.632	0.342	0.632	0.579	0.915	0.861	0.321	0.302	1.78	0.32	6	2
Nkometou	5.48	3.12	1.137	1.699	1.981	3.011	4.3	1.4	3.307	0.73	1.555	1.973	0.723	0.636	0.338	0.683	0.364	0.972	0.818	0.351	0.311	1.773	0.311	6	2
Nkometou	5.48	3.1	1.808	2.395	2.884	3.021	4.48	1.64	3.202	0.417	1.188	1.919	0.79	0.621	0.379	0.774	0.537	1.048	0.847	0.312	0.299	1.716	0.243	6	2
Nkometou	5.42	2.86	1.788	1.786	1.884	3.08	3.78	1.64	3.784	0.792	1.526	1.919	0.746	0.667	0.333	0.537	0.312	1.001	1.064	0.66	0.486	0.541	0.32	6	2
Nkometou	6.32	3.931	1.186	2.373	2.808	3.008	4.945	1.847	3.341	0.84	1.34	1.87	0.63	0.62	0.33	0.636	0.531	1.019	1.039	1.025	1.002	1.722	0.396	6	3
Nkometou	6.388	4.111	1.108	1.555	1.889	1.975	4.995	1.6	3.16	0.71	1.65	1.852	0.855	0.655	0.495	0.388	0.362	0.907	0.869	0.97	0.718	1.2	0.303	7	2
Nkometou	6.26	3.822	1.566	2.425	2.855	3.025	4.981	1.864	3.282	0.81	1.35	1.89	0.62	0.63	0.27	0.589	0.537	0.745	1.268	0.839	0.655	1.621	0.416	6	3
Nkometou	4.96	3.096	1.232	1.474	1.918	1.948	4.47	1.73	3.238	0.876	1.696	1.875	0.688	0.702	0.346	0.424	0.396	0.984	0.788	0.824	0.612	1.062	0.33	6	2
Nkometou	6.28	3.883	1.742	2.418	2.778	3.038	5.023	1.869	3.384	0.84	1.38	1.91	0.62	0.62	0.28	0.569	0.562	1.116	1.275	1.161	0.918	1.752	0.369	6	3
Nkometou	5.378	3.187	1.344	1.44	1.811	1.954	4.614	1.732	3.256	0.758	1.58	1.618	0.558	0.684	0.308	0.3	0.356	0.951	0.84	0.686	0.681	1.236	0.452	7	2
Nkometou	6.41	3.865	1.616	2.134	2.852	3.028	4.484	1.961	3.387	0.88	1.43	1.93	0.64	0.64	0.39	0.514	0.497	0.998	0.937	0.612	0.666	1.761	0.444	6	3
Nkometou	6.312	4.09	1.6595	1.444	1.884	1.974	4.884	1.5	3.261	0.688	1.648	1.85	0.844	0.6	0.484	0.378	0.36	0.987	0.896	0.966	0.806	1.144	0.404	6	2
Nkometou	6.15	3.947	1.846	2.218	2.842	2.942	4.848	1.743	3.363	0.85	1.36	1.75	0.52	0.55	0.15	0.425	0.426	1.021	0.943	0.621	0.498	1.704	0.484	6	3
Nkometou	5.646	3.374	1.866	1.406	1.842	2.148	4.8	1.66	3.156	0.708	1.281	1.862	0.694	0.58	0.344	0.312	0.356	1.063	1.112	0.657	0.643	1.18	0.198	6	2
Nkometou	6.19	3.668	1.642	2.088	2.848	2.857	4.924	1.642	3.115	0.83	1.31	1.81	0.54	0.59	0.19	0.569	0.451	0.898	0.883	0.649	0.534	1.601	0.424	6	3
Nkometou	5.554	3.112	1.745	1.406	1.832	2.046	4.788	1.814	3.236	0.702	1.341	1.886	0.772	0.618	0.42	0.386	0.39	0.898	0.916	0.616	0.556	1.194	0.232	6	2
Nkometou	6.32	3.763	1.666	2.161	2.864	2.995	5.041	1.765	3.308	0.79	1.37	1.91	0.62	0.61	0.31	0.502	0.452	0.998	1.013	0.611	0.548	1.632	0.318	6	3
Nkometou	5.918	3.078	1.481	1.356	1.89	1.81	4.792	1.558	3.362	0.672	1.242	1.974	0.814	0.612	0.388	0.33	0.332	1	1.158	0.78	0.666	1.086	0.272	6	2
Nkometou	6.25	3.724	1.563	2.115	2.824	3.019	4.942	1.865	3.355	0.83	1.35	1.83	0.58	0.45	0.25	0.572	0.485	0.983	0.882	0.578	0.548	1.675	0.445	6	3
Nkometou	5.301	3.046	1.325	1.422	1.874	1.918	4.34	1.466	3.242	0.838	1.206	1.678	0.568	0.536	0.212	0.262	0.374	0.87	1.112	0.674	0.463	1.09	0.29	7	2
Nkometou	6.23	3.464	1.558	2.114	2.822	2.959	4.728	1.863	3.222	0.71	1.31	1.81	0.55	0.43	0.22	0.531	0.505	0.88	0.868	0.596	0.542	1.699	0.402	6	3
Nkometou	5.81	3.75	1.452	1.44	1.622	2.074	4.842	1.672	3.006	0.618	1.302	1.908	0.62	0.552	0.354	0.38	0.356	0.799	0.792	0.558	0.534	1.174	0.232	7	2
Nkometou	6.33	3.524	1.583	2.236	2.844	2.899	4.687	1.822	3.333	0.81	1.33	1.79	0.56	0.47	0.25	0.444	0.545	0.897	0.851	0.705	0.684	1.705	0.359	6	3
Nkometou	4.891	2.906	1.283	1.239	1.492	1.084	3.336	0.859	2.548	0.619	1.512	1.475	0.566	0.474	0.357	0.349	0.342	0.791	0.724	0.575	0.491	0.958	0.415	7	1
Ebang	5.301	3.046	1.325	1.422	1.874	1.918	4.34	1.466	3.242	0.838	1.206	1.678	0.568	0.536	0.212	0.262	0.374	1.075	1.112	0.674	0.601	1.09	0.29	7	2
Ebang	5.918	3.078	1.479	1.356	1.89	1.81	4.792	1.558	3.362	0.672	1.242	1.974	0.814	0.612	0.388	0.33	0.332	0.964	1.158	0.78	0.602	1.086	0.272	6	2
Ebang	5.554	3.112	1.388	1.406	1.832	2.046	4.788	1.814	3.236	0.702	1.341	1.886	0.772	0.618	0.42	0.386	0.39	0.985	0.916	0.616	0.542	1.194	0.232	6	2
Ebang	5.646	3.374	1.412	1.406	1.842	2.148	4.8	1.66	3.156	0.708	1.281	1.862	0.694	0.58	0.344	0.312	0.356	1.058	1.112	0.657	0.533	1.18	0.198	6	2
Ebang	6.312	4.09	1.602	1.444	1.884	1.974	4.884	1.5	3.261	0.688	1.648	1.85	0.844	0.6	0.484	0.378	0.36	0.884	0.896	0.966	0.622	1.144	0.404	6	2
Ebang	5.378	3.187	1.344	1.44	1.811	1.954	4.614	1.732	3.256	0.758	1.58	1.618	0.558	0.684	0.308	0.3	0.356	0.866	0.84	0.686	0.707	1.236	0.452	7	2
Ebang	4.96	3.096	1.204	1.474	1.918	1.948	4.47	1.73	3.238	0.876	1.696	1.875	0.688	0.702	0.346	0.424	0.396	0.881	0.788	0.824	0.743	1.062	0.33	6	2
Ebang	4.708	2.692	1.177	1.592	2.002	2.048	4.654	1.734	3.245	0.63	1.282	1.758	0.82	0.604	0.348	0.4	0.38	0.8	0.77	0.65	0.596	1.346	0.338	7	2
Ebang	6.408	3.786	1.602	1.532	1.948	1.764	4.532	1.715	3.443	0.85	1.662	1.91	0.712	0.606	0.33	0.434	0.358	0.799	0.658	0.802	0.633	1.054	0.446	7	2
Ebang	5.666	3.372	1.638	1.39	1.908	1.918	4.823	1.456	3.256	0.722	1.588	1.988	0.722	0.646	0.396	0.356	0.35	0.781	0.742	0.89	0.863	1.292	0.308	7	2
Ebang	6.732	4.1	1.766	1.398	1.93	1.902	5.074	1.6	3.35	0.8	1.75	1.91	0.656	0.686	0.376	0.42	0.344	0.988	0.926	0.862	0.582	1.204	0.246	6	2
Ebang	5.79	3.738	1.639	1.21	1.898	2.204	4.96	1.66	3.322	0.742	1.728	1.882	0.784	0.594	0.343	0.332	0.318	0.669	0.742	0.696	0.574	1.026	0.322	6	2
Ebang	5.86	3.77	1.465	1.39	1.906	1.964	5.116	1.73	3.342	0.776	1.751	1.944	0.82	0.656	0.39	0.384	0.284	0.747	0.774	0.744	0.549	1.124	0.294	6	2
Ebang	5.68	3.16	1.421	1.434	2	2.25	4.54	1.8	3.44	0.92	1.431	1.96	0.68	0.72	0.43	0.45	0.43	0.979	0.94	0.79	0.609	1.18	0.43	6	2
Ebang	5.82	3.752	1.455	1.51	1.662	2.076	4.844	1.674	3.333	0.616	1.303	1.907	0.626	0.555	0.357	0.382	0.355	0.986	0.797	0.559	0.419	1.175	0.235	7	2
Ebang	5.305	3.045	1.326	1.433	1.975	1.92	4.371	1.477	3.06	0.858	1.226	1.678	0.558	0.563	0.222	0.272	0.374	1.064	1.121	0.647	0.625	1.1	0.3	7	2
Ebang	5.92	3.08	1.48	1.45	1.98	1.81	4.791	1.555	3.252	0.652	1.234	1.947	0.815	0.615	0.399	0.33	0.332	1.077	1.166	0.77	0.611	1.086	0.299	6	2
Ebang	5.55	3.22	1.388	1.41	1.85	2.01	4.79	1.82	3.42	0.722	1.343	1.886	0.727	0.681	0.401	0.39	0.395	0.848	0.92	0.62	0.643	1.184	0.222	6	2
Ebang	5.65	3.47	1.4125	1.412	1.862	2.15	4.83	1.76	3.234	0.718	1.281	1.865	0.684	0.592	0.355	0.325	0.355	1.066	1.111	0.66	0.513	1.18	1.198	6	2
Ebang	6.333	4.111	1.583	1.555	1.889	1.975	4.995	1.6	3.16	0.71	1.65	1.852	0.855	0.655	0.495	0.388	0.362	0.888	0.869	0.97	0.633	1.2	0.303	6	2
Ebang	5.62	3.1	1.405	1.43	1.92	2.17	4.45	1.72	3.23	0.8	1.38	1.68	0.6	0.62	0.35	0.35	0.33	0.869	0.84	0.69	0.333	1.09	0.31	6	2
Ebang	5.6	3.06	1.398	1.42	1.9	2.22	3.86	1.34	3.41	0.79	1.39	1.89	0.7	0.7	0.25	0.32	0.3	1.268	1.21	0.68	0.634	1.15	0.38	6	2
Ebang	5.56	2.98	1.392	1.32	1.93	2.18	3.96	1.64	3.28	0.81	1.26	1.88	0.53	0.62	0.25	0.37	0.36	1.061	1	0.6	0.753	1.12	0.28	6	2
Ebang	5.52	2.94	1.038	1.38	1.87	2.12	4.14	1.78	3.26	0.84	1.33	1.89	0.48	0.58	0.22	0.36	0.35	0.987	0.89	0.86	0.855	1.16	0.45	6	2
Ebang	5.68	3.06	1.402	1.49	2.01	2.24	4.48	1.8	3.46	0.96	1.48	1.96	0.69	0.67	0.34	0.36	0.34	0.872	0.86	0.72	0.714	1.11	0.36	6	2
Ebang	6.64	3.1	1.67	1.46	1.94	2.22	4.82	1.88	3.32	0.92	1.47	1.93	0.62	0.63	0.31	0.332	0.358	0.959	0.914	0.659	0.599	1.12	1.278	7	2
Ebang	5.58	2.98	1.395	1.42	1.97	2.16	4.8	1.64	3.39	0.86	1.4	1.88	0.61	0.65	0.24	0.365	0.35	0.989	0.92	0.89	0.744	1.3	0.31	7	2
Ebang	5.51	2.88	0.57	1.34	1.83	2.18	4.1	1.74	3.24	0.802	1.33	1.872	0.59	0.6	0.22	0.367	0.35	0.885	0.87	0.85	0.661	1.26	0.45	7	2
Ebang	5.53	2.99	1.3825	1.37	1.88	2.1	4.78	1.86	3.38	0.832	1.32	1.88	0.62	0.62	0.62	0.393	0.377	0.985	0.91	0.85	0.741	1.317	0.35	7	2
Ebang	6.31	3.83	1.633	3.55	3.45	3.07	6.96	1.76	3.93	1.61	1.841	1.962	0.826	8.187	0.61	0.476	0.484	0.988	0.77	0.714	0.538	1.727	0.567	6	4
Ebang	6.25	3.3	1.563	4.43	3.43	3.15	6.17	1.71	4.98	1.64	1.61	2.022	0.827	8.971	0.602	0.486	0.477	0.888	0.81	0.723	0.544	1.731	0.672	6	4
Ebang	6.13	3.38	1.533	3.53	3.41	3.04	6.11	1.58	3.81	1.31	1.41	1.872	0.724	8.179	0.531	0.467	0.448	0.719	0.701	0.629	0.481	1.621	0.564	6	4
Ebang	2.854	3.486	1.664	1.071	1.825	1.292	4.395	1.438	3.278	0.779	1.748	1.902	0.722	0.568	0.388	0.525	0.313	0.893	0.742	0.754	0.418	1.834	0.526	7	2
Mbankomo	2.852	3.463	1.65	1.071	1.834	1.271	4.349	1.425	3.329	0.782	1.738	1.768	0.667	0.576	0.326	0.469	0.309	0.807	0.905	0.694	0.454	1.826	0.531	7	2
Mbankomo	5.772	3.457	1.616	1.121	1.857	1.436	4.175	1.377	3.305	0.8	1.799	1.575	0.541	0.527	0.281	0.393	0.344	0.789	0.799	0.782	0.385	1.856	0.556	7	2
Mbankomo	6.324	3.867	1.732	1.624	1.978	0.993	4.338	1.139	3.381	0.815	1.991	1.94	0.656	0.636	0.402	0.318	0.438	1.076	0.874	0.75	0.66	1.123	0.524	7	2
Mbankomo	6.304	3.829	1.703	1.583	1.976	0.983	4.302	1.131	3.345	0.812	1.971	1.949	0.749	0.578	0.378	0.304	0.378	0.964	0.894	0.768	0.471	1.118	0.517	7	2
Mbankomo	6.274	3.819	1.672	1.529	1.932	0.772	4.042	1.087	3.307	0.802	1.791	1.931	0.698	0.578	0.474	0.261	0.358	0.844	0.976	0.738	0.474	1.105	0.493	7	2
Mbankomo	4.892	2.7	1.592	1.118	1.018	1.366	4.636	1.671	3.324	0.684	1.106	1.4	0.658	0.472	0.314	0.392	0.376	0.668	0.75	0.628	0.618	1.063	0.321	7	2
Mbankomo	5.946	3.529	1.56	1.556	1.814	1.318	4.055	1.044	3.098	0.753	1.838	1.793	0.689	0.577	0.433	0.424	0.416	0.961	0.881	0.707	0.599	1.014	0.505	7	2
Mbankomo	4.116	2.442	1.079	1.038	1.256	0.912	2.807	0.723	2.144	0.521	1.273	1.241	0.477	0.399	0.3	0.294	0.287	0.665	0.609	0.491	0.417	0.702	0.349	7	1
Mbankomo	5.566	3.303	1.46	1.387	1.701	1.234	3.796	0.979	2.895	0.704	1.725	1.678	0.645	0.539	0.406	0.397	0.389	0.899	0.824	0.659	0.559	0.949	0.472	7	1
Mbankomo	6.256	3.712	1.641	1.559	1.909	1.387	4.267	1.099	3.259	0.792	1.934	1.887	0.71	0.607	0.456	0.447	0.437	1.004	0.919	0.741	0.634	1.067	0.531	7	2
Mbankomo	6.244	3.705	1.638	1.556	1.905	1.384	4.259	1.097	3.253	0.791	1.931	1.883	0.709	0.605	0.455	0.445	0.436	1.009	0.924	0.743	0.233	1.065	0.53	7	2
Mbankomo	4.832	2.79	1.614	1.258	1.044	1.318	4.62	1.723	3.488	0.694	1.127	1.474	0.632	0.461	0.314	0.372	0.414	0.628	0.712	0.612	0.612	1.09	0.294	7	2
Mbankomo	4.98	3.03	1.72	1.058	1.038	1.278	4.578	1.745	3.423	0.662	1.338	1.502	0.721	0.412	0.274	0.378	0.376	0.592	0.825	0.317	0.632	1.132	0.274	7	2
Mbankomo	5.118	2.522	1.978	1.666	1.928	1.676	4.982	1.816	3.389	0.715	1.396	1.895	0.766	0.686	0.376	0.365	0.3452	0.756	0.879	0.459	0.448	1.048	0.411	7	2
Mbankomo	4.242	2.366	1.912	1.658	1.778	1.612	4.896	0.978	3.418	0.752	1.381	1.862	0.772	0.658	0.349	0.367	0.311	0.901	0.881	0.523	0.48	1.03	0.406	7	2
Mbankomo	4.162	2.432	1.818	1.585	1.754	1.595	4.892	0.996	3.41	0.742	1.374	1.686	0.772	0.651	0.338	0.361	0.3052	0.906	0.874	0.517	0.513	0.983	0.396	7	2
Mbankomo	6.332	3.765	1.661	1.578	1.932	1.404	4.319	1.113	3.299	0.802	1.958	1.909	0.718	0.614	0.462	0.452	0.442	1.022	0.936	0.755	0.643	1.088	0.516	7	2
Mbankomo	6.079	3.615	1.595	1.515	1.855	1.348	4.147	1.068	3.167	0.769	1.879	1.833	0.69	0.589	0.443	0.434	0.425	0.982	0.895	0.721	0.611	1.037	0.537	7	2
Mbankomo	5.665	3.369	1.486	1.412	1.728	1.256	3.864	0.995	2.951	0.717	1.571	1.708	0.656	0.549	0.413	0.403	0.396	0.915	0.838	0.676	0.574	0.967	0.481	7	1
Mbankomo	6.426	3.821	1.686	1.601	1.961	1.425	4.383	1.129	3.348	0.813	1.987	1.938	0.729	0.623	0.468	0.458	0.449	1.035	0.951	0.767	0.652	1.096	0.545	7	2
Mbankomo	5.566	3.31	1.462	1.388	1.698	1.234	3.797	0.987	2.9	0.705	1.721	1.688	0.645	0.539	0.405	0.398	0.389	0.899	0.869	0.665	0.564	0.95	0.472	7	1
Mbankomo	5.555	3.303	1.457	1.384	1.694	1.231	3.789	0.976	2.894	0.703	1.717	1.675	0.644	0.538	0.407	0.396	0.388	0.897	0.823	0.664	0.563	0.948	0.471	7	1
Mbankomo	6.318	3.757	1.657	1.648	1.128	1.401	4.309	1.11	3.291	0.799	1.953	1.905	0.717	0.613	0.46	0.451	0.441	1.02	0.933	0.753	0.641	1.078	0.536	7	2
Mbankomo	6.482	3.855	1.701	1.615	1.977	1.437	4.421	1.139	3.377	0.821	2.004	1.955	0.735	0.629	0.472	0.463	0.453	1.036	0.948	0.765	0.657	1.106	0.551	7	2
Mbankomo	6.602	3.944	1.732	1.645	2.017	1.464	4.503	1.16	3.439	0.836	2.042	1.991	0.749	0.642	0.481	0.472	0.461	0.992	0.977	0.789	0.67	1.127	0.561	7	2
Mbankomo	2.887	1.717	0.757	0.656	0.881	0.639	1.969	0.449	1.504	0.365	0.893	0.871	0.335	0.28	0.211	0.206	0.202	0.466	0.427	0.344	0.292	0.492	0.245	7	1
Mbankomo	4.395	2.613	1.154	1.095	1.341	0.974	2.998	0.773	2.289	0.556	1.359	1.325	0.509	0.426	0.32	0.313	0.307	0.71	0.651	0.515	0.438	0.75	0.373	7	1
Mbankomo	2.557	1.521	0.671	0.637	0.78	0.567	1.743	0.507	1.389	0.324	0.791	0.771	0.296	0.247	0.216	0.183	0.178	0.413	0.378	0.305	0.259	0.436	0.217	7	1
Mbankomo	4.633	2.755	1.215	1.155	1.413	1.027	3.161	0.814	2.414	0.586	1.432	1.397	0.537	0.449	0.337	0.331	0.324	0.748	0.686	0.551	0.47	0.791	0.394	7	1
Mbankomo	5.915	3.517	1.552	1.474	1.804	1.312	4.035	1.039	3.082	0.749	1.829	1.784	0.683	0.574	0.431	0.422	0.413	0.956	0.875	0.707	0.599	1.009	0.5025	7	2
Mbankomo	5.416	3.227	1.421	1.349	1.652	1.201	3.693	0.952	2.821	0.685	1.674	1.633	0.627	0.525	0.394	0.386	0.378	0.875	0.802	0.647	0.549	0.924	0.46	7	1
Mbankomo	5.666	3.369	1.487	1.412	1.728	1.256	3.865	0.995	2.952	0.717	1.752	1.709	0.656	0.549	0.413	0.405	0.396	0.915	0.839	0.672	0.574	0.966	0.481	7	1
Mbankomo	5.733	3.409	1.504	1.429	1.749	1.272	3.911	1.007	2.987	0.725	1.773	1.729	0.664	0.554	0.418	0.409	0.401	0.927	0.849	0.684	0.582	0.978	0.487	7	1
Mbankomo	6.721	3.996	1.763	1.675	2.051	1.491	4.585	1.181	3.502	0.851	2.078	2.027	0.763	0.652	0.49	0.479	0.469	1.084	0.995	0.803	0.683	1.147	0.571	7	2
Mbankomo	6.244	3.713	1.638	1.551	1.905	1.38	4.259	1.097	3.253	0.791	1.931	1.883	0.707	0.605	0.454	0.445	0.437	1.003	0.924	0.745	0.633	1.064	0.53	7	2
Nkolbissong	4.891	2.906	1.283	1.239	1.492	1.084	3.336	0.859	2.548	0.619	1.512	1.475	0.566	0.474	0.357	0.349	0.342	0.791	0.724	0.575	0.491	0.958	0.415	7	1
Nkolbissong	5.614	3.338	1.473	1.399	1.712	1.245	3.829	0.986	2.925	0.711	1.736	1.693	0.651	0.544	0.409	0.401	0.392	0.907	0.831	0.671	0.569	0.996	0.477	7	1
Nkolbissong	4.666	2.774	1.224	1.629	1.423	1.021	3.183	0.819	2.431	0.591	1.443	1.391	0.541	0.452	0.341	0.333	0.326	0.754	0.691	0.539	0.473	0.796	0.396	7	1
Nkolbissong	6.971	4.145	1.829	1.737	2.116	1.545	4.757	1.224	3.632	0.883	2.156	2.103	0.791	0.676	0.508	0.498	0.487	1.116	1.032	0.827	0.707	1.189	0.592	7	2
Nkolbissong	5.408	2.992	1.634	1.066	1.864	1.516	5.374	1.818	3.436	0.946	1.314	1.834	0.752	0.626	0.362	0.394	0.372	0.921	0.626	0.602	0.53	1.031	0.408	7	2
Nkolbissong	5.498	2.912	1.716	1.474	1.972	2.014	5.354	1.868	4.136	1.137	1.336	1.9	0.84	0.69	0.386	0.432	0.414	0.96	0.662	0.612	0.539	1.057	0.437	6	2
Nkolbissong	5.026	2.746	1.512	1.89	1.798	1.93	4.796	1.8	3.552	0.55	1.752	1.85	0.752	0.612	0.392	0.448	0.35	0.822	0.794	0.552	0.502	1.09	0.58	6	2
Nkolbissong	5.024	2.8766	1.576	1.81	1.732	1.984	4.766	1.776	3.516	0.552	1.7	1.814	0.75	0.662	0.359	0.474	0.344	0.826	0.824	0.494	0.5	1.042	0.56	6	2
Nkolbissong	4.888	3.004	1.674	1.624	1.756	1.638	4.784	1.494	1.214	0.774	1.758	1.958	0.706	0.668	0.396	0.436	0.394	0.836	0.894	0.592	0.534	1.186	0.472	7	1
Nkolbissong	4.72	2.812	1.406	1.702	1.802	1.912	4.906	1.476	3.476	0.76	1.59	1.97	0.712	0.65	0.344	0.444	0.348	1.768	0.788	0.608	0.542	0.98	0.465	7	2
Nkolbissong	4.884	2.996	1.534	1.604	1.764	1.718	4.72	1.514	1.194	0.74	1.744	1.922	0.688	0.648	0.406	0.422	0.338	0.874	0.844	0.35	0.436	1.179	0.452	7	1
Nkolbissong	4.664	2.734	1.454	1.766	1.812	1.81	4.858	1.49	3.482	0.712	1.608	1.908	0.73	0.56	0.38	0.444	0.354	0.66	0.782	0.64	0.53	0.918	0.461	7	2
Nkolbissong	5.172	2.852	1.756	1.724	1.866	2.026	5.184	1.764	3.454	0.878	1.524	1.65	0.75	0.574	0.368	0.428	0.36	0.854	0.946	0.54	0.512	1.128	0.488	7	2
Nkolbissong	5.062	2.61	1.728	1.602	1.814	1.87	4.944	1.406	3.398	0.856	1.49	1.642	0.642	0.568	0.354	0.452	0.37	0.888	0.906	0.588	0.498	1.188	0.466	7	2
Nkolbissong	5.762	3.27	1.415	0.91	1.58	1.8	3.28	0.75	3.84	1.25	1.34	1.57	0.55	0.51	0.38	0.42	0.35	0.822	0.78	0.6	0.321	0.72	0.31	7	1
Nkolbissong	5.761	3.26	1.542	0.95	1.58	1.75	3.25	0.8	3.87	1.29	1.36	1.54	0.48	0.55	0.38	0.3	0.27	0.921	0.81	0.73	0.329	0.69	0.33	6	1
Messassi	5.555	3.112	1.321	1.406	1.832	2.046	4.788	1.814	3.236	0.702	1.341	1.886	0.772	0.618	0.42	0.386	0.39	0.944	0.878	0.699	0.634	0.599	0.312	7	2
Messassi	5.768	3.015	1.447	0.901	1.247	1.859	3.199	0.788	3.833	1.263	1.321	1.415	0.448	0.431	0.278	0.267	0.333	0.994	0.888	0.777	0.444	0.651	0.312	7	1
Messassi	5.722	3.026	1.504	1.02	1.648	1.827	3.288	0.783	3.844	1.257	1.345	1.522	0.533	0.521	0.256	0.378	0.332	0.822	0.753	0.717	0.615	0.603	0.334	7	1
Messassi	5.688	3.057	1.563	0.883	1.551	1.867	3.279	0.792	3.853	1.279	1.239	1.623	0.623	0.511	0.289	0.322	0.341	0.912	0.791	0.689	0.589	0.625	0.306	7	1
Messassi	5.646	3.041	1.638	0.945	1.516	1.819	3.126	0.779	3.784	1.2711	1.374	1.535	0.565	0.523	0.301	0.211	0.142	0.949	0.808	0.692	0.495	0.657	0.358	7	1
Messassi	5.588	3.319	1.283	0.917	1.583	1.827	3.227	0.802	3.685	1.264	1.325	1.592	0.578	0.48	0.367	0.233	0.111	0.822	0.843	0.775	0.532	0.649	0.311	7	1
Messassi	5.822	3.277	1.473	0.911	1.581	1.809	3.328	0.753	3.854	1.245	1.374	1.573	0.585	0.511	0.378	0.422	0.353	0.921	0.788	0.606	0.571	0.721	0.311	7	1
Messassi	5.724	3.236	1.224	0.959	1.589	1.765	3.255	0.812	3.876	1.289	1.386	1.541	0.448	0.545	0.388	0.301	0.272	0.908	0.818	0.731	0.655	0.691	0.332	7	1
Messassi	5.668	3.0311	1.829	1.013	1.591	1.867	3.277	0.818	3.872	1.299	1.227	1.421	0.435	0.498	0.267	0.452	0.402	0.984	0.788	0.667	0.645	0.661	0.363	7	1
Messassi	5.787	3.121	1.634	0.959	1.565	1.822	3.266	0.788	3.871	1.234	1.313	1.533	0.522	0.467	0.334	0.363	0.321	0.948	0.753	0.656	0.611	0.617	0.345	7	1
Messassi	5.789	3.087	1.716	0.863	1.555	1.866	3.289	0.777	3.856	1.278	1.323	1.522	0.565	0.512	0.312	0.351	0.331	0.981	0.745	0.678	0.652	0.618	0.359	7	1
Messassi	5.608	3.065	1.512	1.412	1.908	2.145	4.424	1.745	3.324	0.822	1.331	1.886	0.588	0.622	0.323	0.353	0.332	0.901	0.848	0.689	0.625	1.081	0.363	7	2
Messassi	5.586	2.823	1.576	1.391	1.941	2.156	4.029	1.128	3.321	0.772	1.342	1.877	0.542	0.663	0.212	0.385	0.393	1.704	0.926	0.632	0.678	1.274	0.212	7	2
Messassi	5.262	3.236	1.674	1.423	1.903	2.178	3.844	1.276	3.444	0.798	1.372	1.863	0.683	0.587	0.234	0.325	0.367	1.664	1.111	0.676	0.575	1.189	1.201	7	2
Messassi	5.861	3.196	1.406	1.437	1.882	2.222	3.856	1.334	3.412	0.789	1.398	1.896	0.666	0.706	0.178	0.321	0.365	0.908	1.211	0.675	0.565	1.197	1.899	7	2
Messassi	5.856	3.017	1.534	1.385	1.935	2.203	3.987	1.666	3.303	0.823	1.278	1.901	0.555	0.624	0.245	0.368	0.381	0.922	0.901	0.612	0.585	1.124	0.203	7	2
Messassi	5.252	2.992	1.454	1.363	1.835	2.101	4.122	1.766	3.266	0.822	1.333	1.892	0.488	0.608	0.212	0.348	0.362	0.981	0.892	0.877	0.645	1.261	0.425	7	2
Messassi	5.868	3.052	1.756	1.452	1.967	2.202	4.444	1.766	3.422	0.912	1.434	1.912	0.645	0.637	0.335	0.369	0.343	0.729	0.867	0.712	0.675	1.211	0.324	7	2
Messassi	5.658	2.976	1.728	1.411	1.955	2.144	4.781	1.222	3.237	0.834	1.438	1.816	0.621	0.656	0.234	0.365	0.354	0.792	0.721	0.899	0.671	1.323	0.321	7	2
Messassi	5.264	3.088	1.316	1.443	1.922	2.201	4.827	1.064	3.338	0.911	1.545	1.911	0.613	0.595	0.278	0.312	0.358	0.901	0.714	0.659	0.492	1.142	1.178	7	2
Messassi	5.852	2.978	1.464	1.35	1.856	2.087	4.776	1.163	3.376	0.831	1.222	1.818	0.531	0.625	0.189	0.343	0.377	0.731	0.912	0.559	0.483	1.137	0.254	7	2
Messassi	5.456	3.1752	1.364	1.436	1.956	1.928	4.324	2.329	3.203	1.324	1.554	1.874	0.648	0.666	0.324	0.444	0.324	0.925	0.68	1.026	0.695	1.174	0.338	7	2
Messassi	5.248	3.059	1.311	1.436	1.924	2.017	4.982	1.716	3.342	0.722	1.656	1.924	0.664	0.375	0.367	0.424	0.374	0.908	0.946	0.832	0.477	1.38	0.298	7	2
Messassi	5.852	3.0356	1.463	1.46	1.887	1.954	4.989	1.607	3.324	0.901	1.641	2.018	0.743	0.677	0.411	0.382	0.389	0.912	0.891	0.955	0.599	1.264	0.394	7	2
Messassi	5.264	2.998	1.316	1.41	1.923	2.156	4.403	1.727	3.383	0.878	1.449	1.788	0.661	0.589	0.305	0.364	0.361	0.921	0.822	0.628	0.594	1.07	0.303	7	2
Messassi	5.252	3.036	1.313	1.465	1.817	1.934	4.883	1.569	3.342	1.111	1.638	1.966	0.777	0.682	0.401	0.392	0.379	0.922	0.788	0.845	0.575	1.261	0.349	7	2
Messassi	5.756	3.025	1.439	1.403	1.955	2.223	4.002	1.683	3.327	0.845	1.235	1.927	0.574	0.648	0.412	0.396	0.382	0.982	0.923	0.732	0.583	1.231	0.232	7	2
Messassi	5.956	3.1527	1.489	1.463	1.965	1.982	4.432	2.233	3.329	1.211	1.315	1.887	0.684	0.688	0.388	0.454	0.334	0.928	0.888	1.031	0.686	1.213	0.343	7	2
Messassi	5.264	3.0825	1.316	1.406	1.845	2.145	4.782	1.822	3.413	0.931	1.681	1.952	0.538	0.538	0.344	0.337	0.349	1.022	0.847	0.621	0.644	1.094	0.395	7	2
Messassi	5.65	3.1165	1.413	1.448	1.897	1.993	4.986	1.656	3.333	0.813	1.645	1.978	0.523	0.523	0.391	0.418	0.393	1.064	0.931	0.893	0.799	1.201	0.348	7	2
Messassi	6.832	3.239	1.708	2.372	2.806	3.014	4.948	1.854	3.344	0.812	1.343	1.826	0.622	0.612	0.33	0.636	0.531	1.035	1.438	1.222	0.596	1.742	0.382	7	3
Messassi	6.326	3.118	1.706	2.142	2.852	3.026	4.982	1.888	3.328	0.899	1.341	1.838	0.611	0.656	0.26	0.588	0.536	1.604	1.266	0.838	0.478	1.624	0.406	7	3
Messassi	6.826	3.388	1.777	2.141	2.776	3.038	5.021	2.881	3.138	0.834	1.373	1.945	0.631	0.501	0.26	0.568	0.516	1.099	1.474	1.166	0.777	1.748	0.368	7	3
Messassi	6.238	3.086	1.559	2.113	2.852	3.028	4.548	1.966	3.378	0.898	1.442	1.962	0.643	0.631	0.38	0.512	0.496	1.107	0.938	0.612	0.481	1.714	0.444	7	3
Messassi	6.214	3.394	1.554	2.1216	2.842	2.934	4.944	1.774	3.316	0.895	1.235	0.757	0.521	0.543	0.14	0.424	0.426	1.201	0.942	0.682	0.459	1.702	0.484	7	3
Messassi	6.918	3.466	1.929	2.086	2.846	2.825	4.922	1.684	3.191	0.873	1.333	0.798	0.532	0.584	0.18	0.568	0.442	1.406	0.882	0.648	0.585	1.641	0.424	7	3
Messassi	6.83	3.776	1.707	2.116	2.862	2.919	5.042	1.786	3.307	0.739	1.366	1.909	0.667	0.608	0.3	0.512	0.452	1.005	1.012	0.676	0.561	1.632	0.318	7	3
Messassi	6.324	3.072	1.866	2.15	2.824	3.018	4.945	1.886	3.235	0.883	1.334	1.823	0.577	0.449	0.24	0.567	0.484	1.008	0.881	0.578	0.478	1.674	0.444	7	3
Messassi	6.02	3.346	1.505	2.104	2.824	2.957	4.727	1.876	3.322	0.781	1.239	1.804	0.554	0.423	0.2	0.523	0.504	0.882	0.682	0.596	0.647	1.689	0.401	7	3
Messassi	6.522	3.652	1.63	2.2116	2.842	2.896	4.687	1.825	3.433	0.871	1.352	1.785	0.545	0.468	0.22	0.444	0.542	0.898	0.851	0.705	0.681	1.704	0.358	7	3
Messassi	5.381	3.015	1.345	1.414	1.622	2.074	4.842	1.672	3.334	0.618	1.302	1.908	0.632	0.552	0.354	0.378	0.356	0.944	0.792	0.558	0.634	1.174	0.232	7	2
Messassi	5.646	3.374	1.412	1.406	1.842	2.148	4.8	1.66	3.156	0.708	1.281	1.862	0.694	0.58	0.344	0.312	0.356	1.058	1.112	0.657	0.533	1.18	0.198	7	2

## Sheet: ANOVA - Cluster
	You are using the XLSTAT trial version. Number of days remaining until the trial expires: 14
	XLSTAT 2022.3.1.1330 - ANOVA - Start time: 07/14/2022 at 12:36:21 / End time: 07/14/2022 at 12:36:33 / Microsoft Excel 16.015225
	Y / Dependent variables: Workbook = Results morphobiometry.xlsx / Sheet = Dactylurina / Range = 'Dactylurina'!$B$1:$Y$202 / 201 rows and 24 columns
	X / Qualitative: Workbook = Results morphobiometry.xlsx / Sheet = Dactylurina / Range = Dactylurina!$Z$1:$Z$202 / 201 rows and 1 column
	Constraints: an=0
	Confidence interval (%): 95
	Tolerance: 0.0001
	Use least squares means: Yes
	Regression of variable LoCo:
	Goodness of fit statistics (LoCo):
	Observations	201
	Sum of weights	201
	DF	197
	R²	0.231064
	Adjusted R²	0.219354
	MSE	0.336867
	RMSE	0.580403
	MAPE
	DW
	Cp	4
	AIC	-214.742
	SBC	-201.529
	PC	0.800162
	Analysis of variance (LoCo):
	Source	DF	Sum of squares	Mean squares	F	Pr > F
	Model	3	19.9419	6.64729	19.7327	3.16215e-11
	Error	197	66.3628	0.336867
	Corrected Total	200	86.3047
	Computed against model Y=Mean(Y)
	Model parameters (LoCo):
	Source	Value	Standard error	t	Pr > |t|	Lower bound (95%)	Upper bound (95%)
	Intercept	6.23	0.335096	18.5917	3.20223e-45	5.56917	6.89083
	Cluster-1	-0.89615	0.347435	-2.57934	0.0106276	-1.58132	-0.210982
	Cluster-2	-0.644922	0.339	-1.90243	0.0585742	-1.31346	0.0236124
	Cluster-3	0.113	0.351451	0.321524	0.748154	-0.58009	0.80609
	Cluster-4	0	0
	Equation of the model (LoCo):
	LoCo = 6.23000000000003-0.896150000000026*Cluster-1-0.644921875000027*Cluster-2+0.112999999999977*Cluster-3
	Interpretation (LoCo):
	Given the R2, 23% of the variability of the dependent variable LoCo is explained by the explanatory variable.
	Given the p-value of the F statistic computed in the ANOVA table, and given the significance level of 5%, the information brought by the explanatory variables is significantly better than what a basic mean would bring.
	Means charts:
	Cluster / Duncan / Analysis of the differences between the categories with a confidence interval of 95% (LoCo):
	Contrast	Difference	Standardized difference	Critical value	Pr > Diff	alpha (Modified)	Significant
	3 vs 1	1.00915	7.19893	3.03363	7.46614e-11	0.142625	Yes
	3 vs 2	0.757922	6.43772	2.93572	2.71274e-09	0.0975	Yes
	3 vs 4	0.113	0.321524	2.78894	0.748154	0.05	No
	4 vs 1	0.89615	2.57934	2.93572	0.0285258	0.0975	Yes
	4 vs 2	0.644922	1.90243	2.78894	0.0585742	0.05	No
	2 vs 1	0.251228	2.38957	2.78894	0.0178113	0.05	Yes
	Category	LS means	Standard error	Lower bound (95%)	Upper bound (95%)	Groups
	3	6.343	0.105967	6.13403	6.55197	A
	4	6.23	0.335096	5.56917	6.89083	A	B
	2	5.58508	0.0513008	5.48391	5.68625		B
	1	5.33385	0.0917697	5.15287	5.51483			C
	Regression of variable LoAb:
	Goodness of fit statistics (LoAb):
	Observations	201
	Sum of weights	201
	DF	197
	R²	0.187231
	Adjusted R²	0.174853
	MSE	0.137319
	RMSE	0.370565
	MAPE
	DW
	Cp	4
	AIC	-395.116
	SBC	-381.903
	PC	0.845775
	Analysis of variance (LoAb):
	Source	DF	Sum of squares	Mean squares	F	Pr > F
	Model	3	6.23167	2.07722	15.127	6.72946e-09
	Error	197	27.0518	0.137319
	Corrected Total	200	33.2834
	Computed against model Y=Mean(Y)
	Model parameters (LoAb):
	Source	Value	Standard error	t	Pr > |t|	Lower bound (95%)	Upper bound (95%)
	Intercept	3.50333	0.213946	16.3749	1.31974e-38	3.08142	3.92525
	Cluster-1	-0.471031	0.221824	-2.12345	0.0349644	-0.908485	-0.0335767
	Cluster-2	-0.267372	0.216439	-1.23532	0.218181	-0.694206	0.159462
	Cluster-3	0.1176	0.224388	0.524091	0.600804	-0.324912	0.560112
	Cluster-4	0	0
	Equation of the model (LoAb):
	LoAb = 3.50333333333343-0.471030833333433*Cluster-1-0.267371614583436*Cluster-2+0.117599999999899*Cluster-3
	Interpretation (LoAb):
	Given the R2, 19% of the variability of the dependent variable LoAb is explained by the explanatory variable.
	Given the p-value of the F statistic computed in the ANOVA table, and given the significance level of 5%, the information brought by the explanatory variables is significantly better than what a basic mean would bring.
	Means charts:
	Cluster / Duncan / Analysis of the differences between the categories with a confidence interval of 95% (LoAb):
	Contrast	Difference	Standardized difference	Critical value	Pr > Diff	alpha (Modified)	Significant
	3 vs 1	0.588631	6.57688	3.03363	2.5311e-09	0.142625	Yes
	3 vs 2	0.384972	5.12155	2.93572	2.14758e-06	0.0975	Yes
	3 vs 4	0.1176	0.524091	2.78894	0.600804	0.05	No
	4 vs 1	0.471031	2.12345	2.93572	0.0877178	0.0975	Yes
	4 vs 2	0.267372	1.23532	2.78894	0.218181	0.05	No
	2 vs 1	0.203659	3.03403	2.78894	0.00273846	0.05	Yes
	Category	LS means	Standard error	Lower bound (95%)	Upper bound (95%)	Groups
	3	3.62093	0.0676556	3.48751	3.75436	A
	4	3.50333	0.213946	3.08142	3.92525	A	B
	2	3.23596	0.0327536	3.17137	3.30055		B
	1	3.0323	0.0585915	2.91676	3.14785			C
	Regression of variable LoThx:
	Goodness of fit statistics (LoThx):
	Observations	201
	Sum of weights	201
	DF	197
	R²	0.0174339
	Adjusted R²	0.00247092
	MSE	0.0688201
	RMSE	0.262336
	MAPE
	DW
	Cp	4
	AIC	-533.969
	SBC	-520.755
	PC	1.02247
	Analysis of variance (LoThx):
	Source	DF	Sum of squares	Mean squares	F	Pr > F
	Model	3	0.240554	0.0801847	1.16514	0.324212
	Error	197	13.5576	0.0688201
	Corrected Total	200	13.7981
	Computed against model Y=Mean(Y)
	Model parameters (LoThx):
	Source	Value	Standard error	t	Pr > |t|	Lower bound (95%)	Upper bound (95%)
	Intercept	1.57633	0.15146	10.4076	1.70627e-20	1.27764	1.87502
	Cluster-1	-0.0584333	0.157037	-0.3721	0.710218	-0.368122	0.251255
	Cluster-2	-0.0432122	0.153224	-0.28202	0.778225	-0.345383	0.258958
	Cluster-3	0.0483	0.158852	0.304056	0.761406	-0.264969	0.361569
	Cluster-4	0	0
	Equation of the model (LoThx):
	LoThx = 1.5763333333333-5.84333333333044E-02*Cluster-1-4.32122395833036E-02*Cluster-2+4.83000000000294E-02*Cluster-3
	Interpretation (LoThx):
	Given the R2, 2% of the variability of the dependent variable LoThx is explained by the explanatory variable.
	Given the p-value of the F statistic computed in the ANOVA table, and given the significance level of 5%, the information brought by the explanatory variables is not significantly better than what a basic mean would bring. The fact that variables do not bring significant information to the model may be interpreted in different ways: Either the variables do not contribute to the model, or some cov…
	Means charts:
	Cluster / Duncan / Analysis of the differences between the categories with a confidence interval of 95% (LoThx):
	Contrast	Difference	Standardized difference	Critical value	Pr > Diff	alpha (Modified)	Significant
	3 vs 1	0.106733	1.68455	3.03363	0.334576	0.142625	No
	3 vs 2	0.0915122	1.71972	2.93572	0.20037	0.0975	No
	3 vs 4	0.0483	0.304056	2.78894	0.761406	0.05	No
	4 vs 1	0.0584333	0.3721	2.93572	0.926553	0.0975	No
	4 vs 2	0.0432122	0.28202	2.78894	0.778225	0.05	No
	2 vs 1	0.0152211	0.320309	2.78894	0.749074	0.05	No
	Category	LS means	Standard error	Lower bound (95%)	Upper bound (95%)	Groups
	3	1.62463	0.0478957	1.53018	1.71909	A
	4	1.57633	0.15146	1.27764	1.87502	A
	2	1.53312	0.0231874	1.48739	1.57885	A
	1	1.5179	0.0414789	1.4361	1.5997	A
	Regression of variable LoT:
	Goodness of fit statistics (LoT):
	Observations	201
	Sum of weights	201
	DF	197
	R²	0.813935
	Adjusted R²	0.811101
	MSE	0.0435436
	RMSE	0.208671
	MAPE
	DW
	Cp	4
	AIC	-625.973
	SBC	-612.759
	PC	0.193621
	Analysis of variance (LoT):
	Source	DF	Sum of squares	Mean squares	F	Pr > F
	Model	3	37.5246	12.5082	287.256	1.17114e-71
	Error	197	8.5781	0.0435436
	Corrected Total	200	46.1027
	Computed against model Y=Mean(Y)
	Model parameters (LoT):
	Source	Value	Standard error	t	Pr > |t|	Lower bound (95%)	Upper bound (95%)
	Intercept	3.83667	0.120476	31.8458	1.26476e-79	3.59908	4.07426
	Cluster-1	-2.74599	0.124913	-21.9833	0	-2.99233	-2.49965
	Cluster-2	-2.35463	0.12188	-19.3192	0	-2.59498	-2.11427
	Cluster-3	-1.63323	0.126357	-12.9255	0	-1.88241	-1.38404
	Cluster-4	0	0
	Equation of the model (LoT):
	LoT = 3.83666666666663-2.74599166666663*Cluster-1-2.35462760416663*Cluster-2-1.63322666666663*Cluster-3
	Interpretation (LoT):
	Given the R2, 81% of the variability of the dependent variable LoT is explained by the explanatory variable.
	Given the p-value of the F statistic computed in the ANOVA table, and given the significance level of 5%, the information brought by the explanatory variables is significantly better than what a basic mean would bring.
	Means charts:
	Cluster / Duncan / Analysis of the differences between the categories with a confidence interval of 95% (LoT):
	Contrast	Difference	Standardized difference	Critical value	Pr > Diff	alpha (Modified)	Significant
	4 vs 1	2.74599	21.9833	3.03363	0	0.142625	Yes
	4 vs 2	2.35463	19.3192	2.93572	0	0.0975	Yes
	4 vs 3	1.63323	12.9255	2.78894	0	0.05	Yes
	3 vs 1	1.11277	22.0792	2.93572	0	0.0975	Yes
	3 vs 2	0.721401	17.0432	2.78894	0	0.05	Yes
	2 vs 1	0.391364	10.3538	2.78894	0	0.05	Yes
	Category	LS means	Standard error	Lower bound (95%)	Upper bound (95%)	Groups
	4	3.83667	0.120476	3.59908	4.07426	A
	3	2.20344	0.038098	2.12831	2.27857		B
	2	1.48204	0.0184441	1.44567	1.51841			C
	1	1.09068	0.0329938	1.02561	1.15574				D
	Regression of variable LaT:
	Goodness of fit statistics (LaT):
	Observations	201
	Sum of weights	201
	DF	197
	R²	0.824436
	Adjusted R²	0.821763
	MSE	0.0404982
	RMSE	0.201242
	MAPE
	DW
	Cp	4
	AIC	-640.546
	SBC	-627.333
	PC	0.182693
	Analysis of variance (LaT):
	Source	DF	Sum of squares	Mean squares	F	Pr > F
	Model	3	37.4649	12.4883	308.367	3.85644e-74
	Error	197	7.97815	0.0404982
	Corrected Total	200	45.4431
	Computed against model Y=Mean(Y)
	Model parameters (LaT):
	Source	Value	Standard error	t	Pr > |t|	Lower bound (95%)	Upper bound (95%)
	Intercept	3.43	0.116187	29.5214	2.93812e-74	3.20087	3.65913
	Cluster-1	-1.9026	0.120465	-15.7938	0	-2.14017	-1.66503
	Cluster-2	-1.54426	0.117541	-13.1381	0	-1.77606	-1.31246
	Cluster-3	-0.597033	0.121858	-4.89942	2.00118e-06	-0.837347	-0.35672
	Cluster-4	0	0
	Equation of the model (LaT):
	LaT = 3.42999999999986-1.90259999999986*Cluster-1-1.54425859374986*Cluster-2-0.597033333333191*Cluster-3
	Interpretation (LaT):
	Given the R2, 82% of the variability of the dependent variable LaT is explained by the explanatory variable.
	Given the p-value of the F statistic computed in the ANOVA table, and given the significance level of 5%, the information brought by the explanatory variables is significantly better than what a basic mean would bring.
	Means charts:
	Cluster / Duncan / Analysis of the differences between the categories with a confidence interval of 95% (LaT):
	Contrast	Difference	Standardized difference	Critical value	Pr > Diff	alpha (Modified)	Significant
	4 vs 1	1.9026	15.7938	3.03363	0	0.142625	Yes
	4 vs 2	1.54426	13.1381	2.93572	0	0.0975	Yes
	4 vs 3	0.597033	4.89942	2.78894	2.00118e-06	0.05	Yes
	3 vs 1	1.30557	26.861	2.93572	0	0.0975	Yes
	3 vs 2	0.947225	23.2045	2.78894	0	0.05	Yes
	2 vs 1	0.358341	9.83013	2.78894	0	0.05	Yes
	Category	LS means	Standard error	Lower bound (95%)	Upper bound (95%)	Groups
	4	3.43	0.116187	3.20087	3.65913	A
	3	2.83297	0.0367415	2.76051	2.90542		B
	2	1.88574	0.0177874	1.85066	1.92082			C
	1	1.5274	0.0318191	1.46465	1.59015				D
	Regression of variable LoAn:
	Goodness of fit statistics (LoAn):
	Observations	201
	Sum of weights	201
	DF	197
	R²	0.572822
	Adjusted R²	0.566317
	MSE	0.153613
	RMSE	0.391935
	MAPE
	DW
	Cp	4
	AIC	-372.578
	SBC	-359.364
	PC	0.444525
	Analysis of variance (LoAn):
	Source	DF	Sum of squares	Mean squares	F	Pr > F
	Model	3	40.5793	13.5264	88.0554	3.51894e-36
	Error	197	30.2617	0.153613
	Corrected Total	200	70.8411
	Computed against model Y=Mean(Y)
	Model parameters (LoAn):
	Source	Value	Standard error	t	Pr > |t|	Lower bound (95%)	Upper bound (95%)
	Intercept	3.08667	0.226284	13.6407	2.88978e-30	2.64042	3.53292
	Cluster-1	-1.56839	0.234616	-6.68493	2.32157e-10	-2.03107	-1.10571
	Cluster-2	-1.10099	0.22892	-4.80948	3.00097e-06	-1.55244	-0.649538
	Cluster-3	-0.114267	0.237328	-0.481471	0.630716	-0.582297	0.353764
	Cluster-4	0	0
	Equation of the model (LoAn):
	LoAn = 3.08666666666666-1.56839166666665*Cluster-1-1.10098697916665*Cluster-2-0.114266666666655*Cluster-3
	Interpretation (LoAn):
	Given the R2, 57% of the variability of the dependent variable LoAn is explained by the explanatory variable.
	Given the p-value of the F statistic computed in the ANOVA table, and given the significance level of 5%, the information brought by the explanatory variables is significantly better than what a basic mean would bring.
	Means charts:
	Cluster / Duncan / Analysis of the differences between the categories with a confidence interval of 95% (LoAn):
	Contrast	Difference	Standardized difference	Critical value	Pr > Diff	alpha (Modified)	Significant
	4 vs 1	1.56839	6.68493	3.03363	1.39145e-09	0.142625	Yes
	4 vs 2	1.10099	4.80948	2.93572	8.94012e-06	0.0975	Yes
	4 vs 3	0.114267	0.481471	2.78894	0.630716	0.05	No
	3 vs 1	1.45412	15.3614	2.93572	0	0.0975	Yes
	3 vs 2	0.98672	12.4113	2.78894	0	0.05	Yes
	2 vs 1	0.467405	6.58354	2.78894	4.069e-10	0.05	Yes
	Category	LS means	Standard error	Lower bound (95%)	Upper bound (95%)	Groups
	4	3.08667	0.226284	2.64042	3.53292	A
	3	2.9724	0.0715572	2.83128	3.11352	A
	2	1.98568	0.0346425	1.91736	2.054		B
	1	1.51828	0.0619703	1.39606	1.64049			C
	Regression of variable LoAA:
	Goodness of fit statistics (LoAA):
	Observations	201
	Sum of weights	201
	DF	197
	R²	0.699076
	Adjusted R²	0.694493
	MSE	0.143518
	RMSE	0.378838
	MAPE
	DW
	Cp	4
	AIC	-386.241
	SBC	-373.027
	PC	0.313144
	Analysis of variance (LoAA):
	Source	DF	Sum of squares	Mean squares	F	Pr > F
	Model	3	65.6811	21.8937	152.55	3.99948e-51
	Error	197	28.2731	0.143518
	Corrected Total	200	93.9542
	Computed against model Y=Mean(Y)
	Model parameters (LoAA):
	Source	Value	Standard error	t	Pr > |t|	Lower bound (95%)	Upper bound (95%)
	Intercept	6.41333	0.218722	29.3218	8.73569e-74	5.982	6.84467
	Cluster-1	-3.05621	0.226776	-13.4768	0	-3.50343	-2.60899
	Cluster-2	-1.84896	0.22127	-8.3561	1.15463e-14	-2.28532	-1.4126
	Cluster-3	-1.5457	0.229398	-6.73808	1.72598e-10	-1.99809	-1.09331
	Cluster-4	0	0
	Equation of the model (LoAA):
	LoAA = 6.41333333333316-3.05620833333316*Cluster-1-1.84895833333316*Cluster-2-1.54569999999983*Cluster-3
	Interpretation (LoAA):
	Given the R2, 70% of the variability of the dependent variable LoAA is explained by the explanatory variable.
	Given the p-value of the F statistic computed in the ANOVA table, and given the significance level of 5%, the information brought by the explanatory variables is significantly better than what a basic mean would bring.
	Means charts:
	Cluster / Duncan / Analysis of the differences between the categories with a confidence interval of 95% (LoAA):
	Contrast	Difference	Standardized difference	Critical value	Pr > Diff	alpha (Modified)	Significant
	4 vs 1	3.05621	13.4768	3.03363	0	0.142625	Yes
	4 vs 2	1.84896	8.3561	2.93572	0	0.0975	Yes
	4 vs 3	1.5457	6.73808	2.78894	1.7238e-10	0.05	Yes
	3 vs 1	1.51051	16.5086	2.93572	0	0.0975	Yes
	3 vs 2	0.303258	3.94636	2.78894	0.000110337	0.05	Yes
	2 vs 1	1.20725	17.5924	2.78894	0	0.05	Yes
	Category	LS means	Standard error	Lower bound (95%)	Upper bound (95%)	Groups
	4	6.41333	0.218722	5.982	6.84467	A
	3	4.86763	0.069166	4.73123	5.00403		B
	2	4.56437	0.0334848	4.49834	4.63041			C
	1	3.35712	0.0598995	3.239	3.47525				D
	Regression of variable LaAA:
	Goodness of fit statistics (LaAA):
	Observations	201
	Sum of weights	201
	DF	197
	R²	0.622413
	Adjusted R²	0.616663
	MSE	0.0647802
	RMSE	0.25452
	MAPE
	DW
	Cp	4
	AIC	-546.128
	SBC	-532.915
	PC	0.39292
	Analysis of variance (LaAA):
	Source	DF	Sum of squares	Mean squares	F	Pr > F
	Model	3	21.0363	7.01212	108.245	1.92909e-41
	Error	197	12.7617	0.0647802
	Corrected Total	200	33.7981
	Computed against model Y=Mean(Y)
	Model parameters (LaAA):
	Source	Value	Standard error	t	Pr > |t|	Lower bound (95%)	Upper bound (95%)
	Intercept	1.68333	0.146947	11.4554	1.29399e-23	1.39354	1.97312
	Cluster-1	-0.834333	0.152358	-5.47614	1.31514e-07	-1.1348	-0.533872
	Cluster-2	-0.131786	0.148659	-0.886502	0.376428	-0.424954	0.161381
	Cluster-3	0.180033	0.154119	1.16814	0.244161	-0.123902	0.483969
	Cluster-4	0	0
	Equation of the model (LaAA):
	LaAA = 1.68333333333329-0.834333333333286*Cluster-1-0.131786458333285*Cluster-2+0.180033333333381*Cluster-3
	Interpretation (LaAA):
	Given the R2, 62% of the variability of the dependent variable LaAA is explained by the explanatory variable.
	Given the p-value of the F statistic computed in the ANOVA table, and given the significance level of 5%, the information brought by the explanatory variables is significantly better than what a basic mean would bring.
	Means charts:
	Cluster / Duncan / Analysis of the differences between the categories with a confidence interval of 95% (LaAA):
	Contrast	Difference	Standardized difference	Critical value	Pr > Diff	alpha (Modified)	Significant
	3 vs 1	1.01437	16.5012	3.03363	0	0.142625	Yes
	3 vs 2	0.31182	6.03976	2.93572	2.26643e-08	0.0975	Yes
	3 vs 4	0.180033	1.16814	2.78894	0.244161	0.05	No
	4 vs 1	0.834333	5.47614	2.93572	3.93466e-07	0.0975	Yes
	4 vs 2	0.131786	0.886502	2.78894	0.376428	0.05	No
	2 vs 1	0.702547	15.2382	2.78894	0	0.05	Yes
	Category	LS means	Standard error	Lower bound (95%)	Upper bound (95%)	Groups
	3	1.86337	0.0464687	1.77173	1.95501	A
	4	1.68333	0.146947	1.39354	1.97312	A	B
	2	1.55155	0.0224966	1.50718	1.59591		B
	1	0.849	0.0402431	0.769637	0.928363			C
	Regression of variable LoAP:
	Goodness of fit statistics (LoAP):
	Observations	201
	Sum of weights	201
	DF	197
	R²	0.0828795
	Adjusted R²	0.0689132
	MSE	0.181722
	RMSE	0.426288
	MAPE
	DW
	Cp	4
	AIC	-338.802
	SBC	-325.588
	PC	0.954364
	Analysis of variance (LoAP):
	Source	DF	Sum of squares	Mean squares	F	Pr > F
	Model	3	3.23515	1.07838	5.93425	0.000678342
	Error	197	35.7992	0.181722
	Corrected Total	200	39.0343
	Computed against model Y=Mean(Y)
	Model parameters (LoAP):
	Source	Value	Standard error	t	Pr > |t|	Lower bound (95%)	Upper bound (95%)
	Intercept	4.24	0.246118	17.2275	3.58461e-41	3.75464	4.72536
	Cluster-1	-1.05155	0.25518	-4.12081	5.55757e-05	-1.55479	-0.548315
	Cluster-2	-0.910461	0.248985	-3.65669	0.000327791	-1.40148	-0.419443
	Cluster-3	-0.9356	0.25813	-3.62453	0.000368475	-1.44465	-0.426547
	Cluster-4	0	0
	Equation of the model (LoAP):
	LoAP = 4.23999999999987-1.05154999999987*Cluster-1-0.910460937499866*Cluster-2-0.935599999999867*Cluster-3
	Interpretation (LoAP):
	Given the R2, 8% of the variability of the dependent variable LoAP is explained by the explanatory variable.
	Given the p-value of the F statistic computed in the ANOVA table, and given the significance level of 5%, the information brought by the explanatory variables is significantly better than what a basic mean would bring.
	Means charts:
	Cluster / Duncan / Analysis of the differences between the categories with a confidence interval of 95% (LoAP):
	Contrast	Difference	Standardized difference	Critical value	Pr > Diff	alpha (Modified)	Significant
	4 vs 1	1.05155	4.12081	3.03363	0.000322162	0.142625	Yes
	4 vs 3	0.9356	3.62453	2.93572	0.00106936	0.0975	Yes
	4 vs 2	0.910461	3.65669	2.78894	0.000327791	0.05	Yes
	2 vs 1	0.141089	1.82713	2.93572	0.163413	0.0975	No
	2 vs 3	0.0251391	0.290725	2.78894	0.771567	0.05	No
	3 vs 1	0.11595	1.12618	2.78894	0.261458	0.05	No
	Category	LS means	Standard error	Lower bound (95%)	Upper bound (95%)	Groups
	4	4.24	0.246118	3.75464	4.72536	A
	2	3.32954	0.0376789	3.25523	3.40384		B
	3	3.3044	0.0778292	3.15091	3.45789		B
	1	3.18845	0.0674021	3.05553	3.32137		B
	Regression of variable LaAP:
	Goodness of fit statistics (LaAP):
	Observations	201
	Sum of weights	201
	DF	197
	R²	0.253858
	Adjusted R²	0.242495
	MSE	0.0350424
	RMSE	0.187196
	MAPE
	DW
	Cp	4
	AIC	-669.631
	SBC	-656.417
	PC	0.776443
	Analysis of variance (LaAP):
	Source	DF	Sum of squares	Mean squares	F	Pr > F
	Model	3	2.34871	0.782902	22.3415	1.70742e-12
	Error	197	6.90336	0.0350424
	Corrected Total	200	9.25207
	Computed against model Y=Mean(Y)
	Model parameters (LaAP):
	Source	Value	Standard error	t	Pr > |t|	Lower bound (95%)	Upper bound (95%)
	Intercept	1.52	0.108078	14.0639	1.46037e-31	1.30686	1.73314
	Cluster-1	-0.538972	0.112057	-4.80979	2.99687e-06	-0.759959	-0.317986
	Cluster-2	-0.718859	0.109337	-6.57471	4.27421e-10	-0.934481	-0.503238
	Cluster-3	-0.688833	0.113353	-6.07689	6.22703e-09	-0.912374	-0.465292
	Cluster-4	0	0
	Equation of the model (LaAP):
	LaAP = 1.51999999999999-0.53897249999999*Cluster-1-0.71885937499999*Cluster-2-0.688833333333323*Cluster-3
	Interpretation (LaAP):
	Given the R2, 25% of the variability of the dependent variable LaAP is explained by the explanatory variable.
	Given the p-value of the F statistic computed in the ANOVA table, and given the significance level of 5%, the information brought by the explanatory variables is significantly better than what a basic mean would bring.
	Means charts:
	Cluster / Duncan / Analysis of the differences between the categories with a confidence interval of 95% (LaAP):
	Contrast	Difference	Standardized difference	Critical value	Pr > Diff	alpha (Modified)	Significant
	4 vs 2	0.718859	6.57471	3.03363	2.56153e-09	0.142625	Yes
	4 vs 3	0.688833	6.07689	2.93572	1.86596e-08	0.0975	Yes
	4 vs 1	0.538972	4.80979	2.78894	2.99687e-06	0.05	Yes
	1 vs 2	0.179887	5.30497	2.93572	9.01577e-07	0.0975	Yes
	1 vs 3	0.149861	3.31461	2.78894	0.00109227	0.05	Yes
	3 vs 2	0.030026	0.790748	2.78894	0.430042	0.05	No
	Category	LS means	Standard error	Lower bound (95%)	Upper bound (95%)	Groups
	4	1.52	0.108078	1.30686	1.73314	A
	1	0.981027	0.0295983	0.922657	1.0394		B
	3	0.831167	0.0341772	0.763767	0.898567			C
	2	0.801141	0.016546	0.768511	0.833771			C
	Regression of variable LoF:
	Goodness of fit statistics (LoF):
	Observations	201
	Sum of weights	201
	DF	197
	R²	0.0801166
	Adjusted R²	0.0661082
	MSE	0.0462841
	RMSE	0.215137
	MAPE
	DW
	Cp	4
	AIC	-613.705
	SBC	-600.492
	PC	0.957239
	Analysis of variance (LoF):
	Source	DF	Sum of squares	Mean squares	F	Pr > F
	Model	3	0.794122	0.264707	5.71919	0.000898569
	Error	197	9.11796	0.0462841
	Corrected Total	200	9.91209
	Computed against model Y=Mean(Y)
	Model parameters (LoF):
	Source	Value	Standard error	t	Pr > |t|	Lower bound (95%)	Upper bound (95%)
	Intercept	1.62033	0.12421	13.0452	1.92068e-28	1.37538	1.86528
	Cluster-1	-0.205758	0.128783	-1.59771	0.11171	-0.459729	0.0482124
	Cluster-2	-0.117966	0.125657	-0.938797	0.348985	-0.365771	0.129839
	Cluster-3	-0.276733	0.130272	-2.12427	0.0348944	-0.53364	-0.0198264
	Cluster-4	0	0
	Equation of the model (LoF):
	LoF = 1.62033333333339-0.205758333333387*Cluster-1-0.117966145833388*Cluster-2-0.276733333333389*Cluster-3
	Interpretation (LoF):
	Given the R2, 8% of the variability of the dependent variable LoF is explained by the explanatory variable.
	Given the p-value of the F statistic computed in the ANOVA table, and given the significance level of 5%, the information brought by the explanatory variables is significantly better than what a basic mean would bring.
	Means charts:
	Groupings could not be performed with an exact method because the significance of differences is not transitive in this particular case. The harmonic mean of the group sizes needed to be used.
	Harmonic mean:		10.013
	Cluster / Duncan / Analysis of the differences between the categories with a confidence interval of 95% (LoF):
	Contrast	Difference	Standardized difference	Critical value	Pr > Diff	alpha (Modified)	Significant
	4 vs 3	0.276733	2.87815	3.03363	0.0228516	0.142625	Yes
	4 vs 1	0.205758	2.13998	2.93572	0.0845095	0.0975	Yes
	4 vs 2	0.117966	1.2269	2.78894	0.221324	0.05	No
	2 vs 3	0.158767	1.65125	2.93572	0.226793	0.0975	No
	2 vs 1	0.0877922	0.913078	2.78894	0.362317	0.05	No
	1 vs 3	0.070975	0.738172	2.78894	0.461288	0.05	No
	Category	LS means	Standard error	Lower bound (95%)	Upper bound (95%)	Groups
	4	1.62033	0.12421	1.37538	1.86528	A
	2	1.50237	0.0190156	1.46487	1.53987	A	B
	1	1.41458	0.0340162	1.34749	1.48166		B
	3	1.3436	0.0392785	1.26614	1.42106		B
	Regression of variable LoTi:
	Goodness of fit statistics (LoTi):
	Observations	201
	Sum of weights	201
	DF	197
	R²	0.344133
	Adjusted R²	0.334145
	MSE	0.0380125
	RMSE	0.194968
	MAPE
	DW
	Cp	4
	AIC	-653.278
	SBC	-640.065
	PC	0.682502
	Analysis of variance (LoTi):
	Source	DF	Sum of squares	Mean squares	F	Pr > F
	Model	3	3.92918	1.30973	34.4552	6.02088e-18
	Error	197	7.48845	0.0380125
	Corrected Total	200	11.4176
	Computed against model Y=Mean(Y)
	Model parameters (LoTi):
	Source	Value	Standard error	t	Pr > |t|	Lower bound (95%)	Upper bound (95%)
	Intercept	1.952	0.112565	17.3411	1.63863e-41	1.73001	2.17399
	Cluster-1	-0.4266	0.11671	-3.65523	0.000329545	-0.656761	-0.196439
	Cluster-2	-0.0789922	0.113876	-0.693667	0.488708	-0.303565	0.145581
	Cluster-3	-0.240433	0.118059	-2.03655	0.0430329	-0.473255	-0.00761188
	Cluster-4	0	0
	Equation of the model (LoTi):
	LoTi = 1.95199999999997-0.42659999999997*Cluster-1-7.89921874999692E-02*Cluster-2-0.240433333333302*Cluster-3
	Interpretation (LoTi):
	Given the R2, 34% of the variability of the dependent variable LoTi is explained by the explanatory variable.
	Given the p-value of the F statistic computed in the ANOVA table, and given the significance level of 5%, the information brought by the explanatory variables is significantly better than what a basic mean would bring.
	Means charts:
	Groupings could not be performed with an exact method because the significance of differences is not transitive in this particular case. The harmonic mean of the group sizes needed to be used.
	Harmonic mean:		10.013
	Cluster / Duncan / Analysis of the differences between the categories with a confidence interval of 95% (LoTi):
	Contrast	Difference	Standardized difference	Critical value	Pr > Diff	alpha (Modified)	Significant
	4 vs 1	0.4266	4.89582	3.03363	1.20562e-05	0.142625	Yes
	4 vs 3	0.240433	2.7593	2.93572	0.0173544	0.0975	Yes
	4 vs 2	0.0789922	0.906544	2.78894	0.365755	0.05	No
	2 vs 1	0.347608	3.98928	2.93572	0.000274394	0.0975	Yes
	2 vs 3	0.161441	1.85276	2.78894	0.0654125	0.05	No
	3 vs 1	0.186167	2.13652	2.78894	0.0338707	0.05	Yes
	Category	LS means	Standard error	Lower bound (95%)	Upper bound (95%)	Groups
	4	1.952	0.112565	1.73001	2.17399	A
	2	1.87301	0.0172329	1.83902	1.90699	A	B
	3	1.71157	0.0355961	1.64137	1.78176		B
	1	1.5254	0.0308271	1.46461	1.58619			C
	Regression of variable LaTi:
	Goodness of fit statistics (LaTi):
	Observations	201
	Sum of weights	201
	DF	197
	R²	0.318944
	Adjusted R²	0.308573
	MSE	0.00713909
	RMSE	0.0844931
	MAPE
	DW
	Cp	4
	AIC	-989.416
	SBC	-976.203
	PC	0.708713
	Analysis of variance (LaTi):
	Source	DF	Sum of squares	Mean squares	F	Pr > F
	Model	3	0.658629	0.219543	30.7522	2.37556e-16
	Error	197	1.4064	0.00713909
	Corrected Total	200	2.06503
	Computed against model Y=Mean(Y)
	Model parameters (LaTi):
	Source	Value	Standard error	t	Pr > |t|	Lower bound (95%)	Upper bound (95%)
	Intercept	0.792333	0.0487821	16.2423	3.32281e-38	0.696131	0.888536
	Cluster-1	-0.240808	0.0505784	-4.76109	3.72369e-06	-0.340553	-0.141064
	Cluster-2	-0.11449	0.0493505	-2.31993	0.0213692	-0.211813	-0.0171665
	Cluster-3	-0.2079	0.0511631	-4.06347	6.97988e-05	-0.308798	-0.107002
	Cluster-4	0	0
	Equation of the model (LaTi):
	LaTi = 0.792333333333326-0.240808333333327*Cluster-1-0.114489583333327*Cluster-2-0.207899999999993*Cluster-3
	Interpretation (LaTi):
	Given the R2, 32% of the variability of the dependent variable LaTi is explained by the explanatory variable.
	Given the p-value of the F statistic computed in the ANOVA table, and given the significance level of 5%, the information brought by the explanatory variables is significantly better than what a basic mean would bring.
	Means charts:
	Cluster / Duncan / Analysis of the differences between the categories with a confidence interval of 95% (LaTi):
	Contrast	Difference	Standardized difference	Critical value	Pr > Diff	alpha (Modified)	Significant
	4 vs 1	0.240808	4.76109	3.03363	2.2016e-05	0.142625	Yes
	4 vs 3	0.2079	4.06347	2.93572	0.000205451	0.0975	Yes
	4 vs 2	0.11449	2.31993	2.78894	0.0213692	0.05	Yes
	2 vs 1	0.126319	8.25328	2.93572	0	0.0975	Yes
	2 vs 3	0.0934104	5.45018	2.78894	1.49327e-07	0.05	Yes
	3 vs 1	0.0329083	1.6126	2.78894	0.108433	0.05	No
	Category	LS means	Standard error	Lower bound (95%)	Upper bound (95%)	Groups
	4	0.792333	0.0487821	0.696131	0.888536	A
	2	0.677844	0.00746821	0.663116	0.692572		B
	3	0.584433	0.0154263	0.554012	0.614855			C
	1	0.551525	0.0133595	0.525179	0.577871			C
	Regression of variable LoM:
	Goodness of fit statistics (LoM):
	Observations	201
	Sum of weights	201
	DF	197
	R²	0.992978
	Adjusted R²	0.992872
	MSE	0.00657773
	RMSE	0.0811032
	MAPE
	DW
	Cp	4
	AIC	-1005.88
	SBC	-992.664
	PC	0.0073067
	Analysis of variance (LoM):
	Source	DF	Sum of squares	Mean squares	F	Pr > F
	Model	3	183.252	61.084	9286.48	8.37597e-212
	Error	197	1.29581	0.00657773
	Corrected Total	200	184.548
	Computed against model Y=Mean(Y)
	Model parameters (LoM):
	Source	Value	Standard error	t	Pr > |t|	Lower bound (95%)	Upper bound (95%)
	Intercept	8.44567	0.046825	180.367	1.09467e-220	8.35332	8.53801
	Cluster-1	-7.94934	0.0485492	-163.738	0	-8.04508	-7.8536
	Cluster-2	-7.83148	0.0473705	-165.324	0	-7.9249	-7.73806
	Cluster-3	-7.8945	0.0491104	-160.75	0	-7.99135	-7.79765
	Cluster-4	0	0
	Equation of the model (LoM):
	LoM = 8.44566666666662-7.94934166666662*Cluster-1-7.83147916666662*Cluster-2-7.89449999999995*Cluster-3
	Interpretation (LoM):
	Given the R2, 99% of the variability of the dependent variable LoM is explained by the explanatory variable.
	Given the p-value of the F statistic computed in the ANOVA table, and given the significance level of 5%, the information brought by the explanatory variables is significantly better than what a basic mean would bring.
	Means charts:
	Cluster / Duncan / Analysis of the differences between the categories with a confidence interval of 95% (LoM):
	Contrast	Difference	Standardized difference	Critical value	Pr > Diff	alpha (Modified)	Significant
	4 vs 1	7.94934	163.738	3.03363	0	0.142625	Yes
	4 vs 3	7.8945	160.75	2.93572	0	0.0975	Yes
	4 vs 2	7.83148	165.324	2.78894	0	0.05	Yes
	2 vs 1	0.117862	8.02265	2.93572	6.73905e-14	0.0975	Yes
	2 vs 3	0.0630208	3.83074	2.78894	0.000171685	0.05	Yes
	3 vs 1	0.0548417	2.79972	2.78894	0.00562376	0.05	Yes
	Category	LS means	Standard error	Lower bound (95%)	Upper bound (95%)	Groups
	4	8.44567	0.046825	8.35332	8.53801	A
	2	0.614187	0.00716858	0.60005	0.628325		B
	3	0.551167	0.0148074	0.521965	0.580368			C
	1	0.496325	0.0128235	0.471036	0.521614				D
	Regression of variable LaM:
	Goodness of fit statistics (LaM):
	Observations	201
	Sum of weights	201
	DF	197
	R²	0.262472
	Adjusted R²	0.251241
	MSE	0.00574811
	RMSE	0.0758163
	MAPE
	DW
	Cp	4
	AIC	-1032.98
	SBC	-1019.76
	PC	0.767478
	Analysis of variance (LaM):
	Source	DF	Sum of squares	Mean squares	F	Pr > F
	Model	3	0.402992	0.134331	23.3696	5.52752e-13
	Error	197	1.13238	0.00574811
	Corrected Total	200	1.53537
	Computed against model Y=Mean(Y)
	Model parameters (LaM):
	Source	Value	Standard error	t	Pr > |t|	Lower bound (95%)	Upper bound (95%)
	Intercept	0.581	0.0437726	13.2732	3.8555e-29	0.494677	0.667323
	Cluster-1	-0.24035	0.0453844	-5.29588	3.15004e-07	-0.329852	-0.150848
	Cluster-2	-0.230328	0.0442826	-5.20133	4.94053e-07	-0.317657	-0.142999
	Cluster-3	-0.325667	0.0459091	-7.09374	2.29323e-11	-0.416203	-0.23513
	Cluster-4	0	0
	Equation of the model (LaM):
	LaM = 0.580999999999993-0.240349999999993*Cluster-1-0.230328124999993*Cluster-2-0.32566666666666*Cluster-3
	Interpretation (LaM):
	Given the R2, 26% of the variability of the dependent variable LaM is explained by the explanatory variable.
	Given the p-value of the F statistic computed in the ANOVA table, and given the significance level of 5%, the information brought by the explanatory variables is significantly better than what a basic mean would bring.
	Means charts:
	Cluster / Duncan / Analysis of the differences between the categories with a confidence interval of 95% (LaM):
	Contrast	Difference	Standardized difference	Critical value	Pr > Diff	alpha (Modified)	Significant
	4 vs 3	0.325667	7.09374	3.03363	1.37319e-10	0.142625	Yes
	4 vs 1	0.24035	5.29588	2.93572	9.41675e-07	0.0975	Yes
	4 vs 2	0.230328	5.20133	2.78894	4.94053e-07	0.05	Yes
	2 vs 3	0.0953385	6.1993	2.93572	9.77637e-09	0.0975	Yes
	2 vs 1	0.0100219	0.729738	2.78894	0.466417	0.05	No
	1 vs 3	0.0853167	4.65922	2.78894	5.83469e-06	0.05	Yes
	Category	LS means	Standard error	Lower bound (95%)	Upper bound (95%)	Groups
	4	0.581	0.0437726	0.494677	0.667323	A
	2	0.350672	0.00670128	0.337456	0.363887		B
	1	0.34065	0.0119876	0.317009	0.364291		B
	3	0.255333	0.0138421	0.228036	0.282631			C
	Regression of variable DoD:
	Goodness of fit statistics (DoD):
	Observations	201
	Sum of weights	201
	DF	197
	R²	0.340232
	Adjusted R²	0.330185
	MSE	0.00662614
	RMSE	0.0814011
	MAPE
	DW
	Cp	4
	AIC	-1004.4
	SBC	-991.19
	PC	0.68656
	Analysis of variance (DoD):
	Source	DF	Sum of squares	Mean squares	F	Pr > F
	Model	3	0.673149	0.224383	33.8633	1.07376e-17
	Error	197	1.30535	0.00662614
	Corrected Total	200	1.9785
	Computed against model Y=Mean(Y)
	Model parameters (DoD):
	Source	Value	Standard error	t	Pr > |t|	Lower bound (95%)	Upper bound (95%)
	Intercept	0.476333	0.046997	10.1354	1.07172e-19	0.383652	0.569015
	Cluster-1	-0.133308	0.0487275	-2.73579	0.0067914	-0.229403	-0.0372139
	Cluster-2	-0.077388	0.0475445	-1.6277	0.105188	-0.17115	0.0163735
	Cluster-3	0.0581667	0.0492908	1.18007	0.239395	-0.0390387	0.155372
	Cluster-4	0	0
	Equation of the model (DoD):
	DoD = 0.476333333333336-0.133308333333336*Cluster-1-7.73880208333357E-02*Cluster-2+5.81666666666644E-02*Cluster-3
	Interpretation (DoD):
	Given the R2, 34% of the variability of the dependent variable DoD is explained by the explanatory variable.
	Given the p-value of the F statistic computed in the ANOVA table, and given the significance level of 5%, the information brought by the explanatory variables is significantly better than what a basic mean would bring.
	Means charts:
	Cluster / Duncan / Analysis of the differences between the categories with a confidence interval of 95% (DoD):
	Contrast	Difference	Standardized difference	Critical value	Pr > Diff	alpha (Modified)	Significant
	3 vs 1	0.191475	9.7392	3.03363	0	0.142625	Yes
	3 vs 2	0.135555	8.20959	2.93572	0	0.0975	Yes
	3 vs 4	0.0581667	1.18007	2.78894	0.239395	0.05	No
	4 vs 1	0.133308	2.73579	2.93572	0.0185496	0.0975	Yes
	4 vs 2	0.077388	1.6277	2.78894	0.105188	0.05	No
	2 vs 1	0.0559203	3.79245	2.78894	0.000198326	0.05	Yes
	Category	LS means	Standard error	Lower bound (95%)	Upper bound (95%)	Groups
	3	0.5345	0.0148617	0.505191	0.563809	A
	4	0.476333	0.046997	0.383652	0.569015	A	B
	2	0.398945	0.00719491	0.384756	0.413134		B
	1	0.343025	0.0128706	0.317643	0.368407			C
	Regression of variable DooD:
	Goodness of fit statistics (DooD):
	Observations	201
	Sum of weights	201
	DF	197
	R²	0.505731
	Adjusted R²	0.498204
	MSE	0.00291045
	RMSE	0.0539486
	MAPE
	DW
	Cp	4
	AIC	-1169.77
	SBC	-1156.56
	PC	0.514341
	Analysis of variance (DooD):
	Source	DF	Sum of squares	Mean squares	F	Pr > F
	Model	3	0.586654	0.195551	67.1894	5.75859e-30
	Error	197	0.573359	0.00291045
	Corrected Total	200	1.16001
	Computed against model Y=Mean(Y)
	Model parameters (DooD):
	Source	Value	Standard error	t	Pr > |t|	Lower bound (95%)	Upper bound (95%)
	Intercept	0.469667	0.0311472	15.0789	1.14678e-34	0.408242	0.531091
	Cluster-1	-0.153467	0.0322941	-4.75215	3.87445e-06	-0.217153	-0.0897801
	Cluster-2	-0.0959135	0.0315101	-3.0439	0.00265417	-0.158054	-0.0337731
	Cluster-3	0.0251333	0.0326675	0.769368	0.442596	-0.0392896	0.0895562
	Cluster-4	0	0
	Equation of the model (DooD):
	DooD = 0.469666666666664-0.153466666666664*Cluster-1-0.095913541666664*Cluster-2+0.025133333333336*Cluster-3
	Interpretation (DooD):
	Given the R2, 51% of the variability of the dependent variable DooD is explained by the explanatory variable.
	Given the p-value of the F statistic computed in the ANOVA table, and given the significance level of 5%, the information brought by the explanatory variables is significantly better than what a basic mean would bring.
	Means charts:
	Cluster / Duncan / Analysis of the differences between the categories with a confidence interval of 95% (DooD):
	Contrast	Difference	Standardized difference	Critical value	Pr > Diff	alpha (Modified)	Significant
	3 vs 1	0.1786	13.707	3.03363	0	0.142625	Yes
	3 vs 2	0.121047	11.0614	2.93572	0	0.0975	Yes
	3 vs 4	0.0251333	0.769368	2.78894	0.442596	0.05	No
	4 vs 1	0.153467	4.75215	2.93572	1.15356e-05	0.0975	Yes
	4 vs 2	0.0959135	3.0439	2.78894	0.00265417	0.05	Yes
	2 vs 1	0.0575531	5.88937	2.78894	1.64983e-08	0.05	Yes
	Category	LS means	Standard error	Lower bound (95%)	Upper bound (95%)	Groups
	3	0.4948	0.00984962	0.475376	0.514224	A
	4	0.469667	0.0311472	0.408242	0.531091	A
	2	0.373753	0.00476843	0.364349	0.383157		B
	1	0.3162	0.00853002	0.299378	0.333022			C
	Regression of variable La1T:
	Goodness of fit statistics (La1T):
	Observations	201
	Sum of weights	201
	DF	197
	R²	0.0757196
	Adjusted R²	0.0616443
	MSE	0.0411231
	RMSE	0.202788
	MAPE
	DW
	Cp	4
	AIC	-637.469
	SBC	-624.256
	PC	0.961815
	Analysis of variance (La1T):
	Source	DF	Sum of squares	Mean squares	F	Pr > F
	Model	3	0.663676	0.221225	5.37959	0.00140165
	Error	197	8.10124	0.0411231
	Corrected Total	200	8.76492
	Computed against model Y=Mean(Y)
	Model parameters (La1T):
	Source	Value	Standard error	t	Pr > |t|	Lower bound (95%)	Upper bound (95%)
	Intercept	0.865	0.11708	7.38812	4.13048e-12	0.634109	1.09589
	Cluster-1	-0.00325	0.121391	-0.026773	0.978668	-0.242643	0.236143
	Cluster-2	0.106281	0.118444	0.897313	0.370647	-0.1273	0.339862
	Cluster-3	0.183367	0.122794	1.49328	0.136963	-0.0587935	0.425527
	Cluster-4	0	0
	Equation of the model (La1T):
	La1T = 0.865000000000015-3.25000000001473E-03*Cluster-1+0.106281249999985*Cluster-2+0.183366666666651*Cluster-3
	Interpretation (La1T):
	Given the R2, 8% of the variability of the dependent variable La1T is explained by the explanatory variable.
	Given the p-value of the F statistic computed in the ANOVA table, and given the significance level of 5%, the information brought by the explanatory variables is significantly better than what a basic mean would bring.
	Means charts:
	Cluster / Duncan / Analysis of the differences between the categories with a confidence interval of 95% (La1T):
	Contrast	Difference	Standardized difference	Critical value	Pr > Diff	alpha (Modified)	Significant
	3 vs 1	0.186617	3.81021	3.03363	0.00105762	0.142625	Yes
	3 vs 4	0.183367	1.49328	2.93572	0.29634	0.0975	No
	3 vs 2	0.0770854	1.87399	2.78894	0.0624127	0.05	No
	2 vs 1	0.109531	2.98178	2.93572	0.00901659	0.0975	Yes
	2 vs 4	0.106281	0.897313	2.78894	0.370647	0.05	No
	4 vs 1	0.00325	0.026773	2.78894	0.978668	0.05	No
	Category	LS means	Standard error	Lower bound (95%)	Upper bound (95%)	Groups
	3	1.04837	0.0370239	0.975353	1.12138	A
	2	0.971281	0.0179241	0.935933	1.00663	A
	4	0.865	0.11708	0.634109	1.09589	A	B
	1	0.86175	0.0320636	0.798518	0.924982		B
	Regression of variable La2T:
	Goodness of fit statistics (La2T):
	Observations	201
	Sum of weights	201
	DF	197
	R²	0.217893
	Adjusted R²	0.205983
	MSE	0.0219046
	RMSE	0.148002
	MAPE
	DW
	Cp	4
	AIC	-764.073
	SBC	-750.86
	PC	0.813868
	Analysis of variance (La2T):
	Source	DF	Sum of squares	Mean squares	F	Pr > F
	Model	3	1.20221	0.400735	18.2945	1.63796e-10
	Error	197	4.31521	0.0219046
	Corrected Total	200	5.51742
	Computed against model Y=Mean(Y)
	Model parameters (La2T):
	Source	Value	Standard error	t	Pr > |t|	Lower bound (95%)	Upper bound (95%)
	Intercept	0.760333	0.085449	8.89809	3.70073e-16	0.591821	0.928846
	Cluster-1	0.00736667	0.0885955	0.0831495	0.933817	-0.167351	0.182084
	Cluster-2	0.143581	0.0864446	1.66096	0.0983128	-0.0268949	0.314056
	Cluster-3	0.262567	0.0896197	2.92979	0.00379229	0.0858295	0.439304
	Cluster-4	0	0
	Equation of the model (La2T):
	La2T = 0.760333333333311+7.36666666668868E-03*Cluster-1+0.143580729166689*Cluster-2+0.262566666666689*Cluster-3
	Interpretation (La2T):
	Given the R2, 22% of the variability of the dependent variable La2T is explained by the explanatory variable.
	Given the p-value of the F statistic computed in the ANOVA table, and given the significance level of 5%, the information brought by the explanatory variables is significantly better than what a basic mean would bring.
	Means charts:
	Groupings could not be performed with an exact method because the significance of differences is not transitive in this particular case. The harmonic mean of the group sizes needed to be used.
	Harmonic mean:		10.013
	Cluster / Duncan / Analysis of the differences between the categories with a confidence interval of 95% (La2T):
	Contrast	Difference	Standardized difference	Critical value	Pr > Diff	alpha (Modified)	Significant
	3 vs 4	0.262567	3.96954	3.03363	0.000580368	0.142625	Yes
	3 vs 1	0.2552	3.85816	2.93572	0.000452851	0.0975	Yes
	3 vs 2	0.118986	1.79885	2.78894	0.0735726	0.05	No
	2 vs 4	0.143581	2.17068	2.93572	0.0788042	0.0975	Yes
	2 vs 1	0.136214	2.05931	2.78894	0.0407797	0.05	Yes
	1 vs 4	0.00736667	0.111371	2.78894	0.911436	0.05	No
	Category	LS means	Standard error	Lower bound (95%)	Upper bound (95%)	Groups
	3	1.0229	0.0270214	0.969612	1.07619	A
	2	0.903914	0.0130817	0.878116	0.929712	A
	1	0.7677	0.0234012	0.721551	0.813849		B
	4	0.760333	0.085449	0.591821	0.928846		B
	Regression of variable La3T:
	Goodness of fit statistics (La3T):
	Observations	201
	Sum of weights	201
	DF	197
	R²	0.0514558
	Adjusted R²	0.0370109
	MSE	0.0248629
	RMSE	0.15768
	MAPE
	DW
	Cp	4
	AIC	-738.61
	SBC	-725.397
	PC	0.987064
	Analysis of variance (La3T):
	Source	DF	Sum of squares	Mean squares	F	Pr > F
	Model	3	0.265702	0.0885672	3.56222	0.0152214
	Error	197	4.89799	0.0248629
	Corrected Total	200	5.16369
	Computed against model Y=Mean(Y)
	Model parameters (La3T):
	Source	Value	Standard error	t	Pr > |t|	Lower bound (95%)	Upper bound (95%)
	Intercept	0.688667	0.0910364	7.56474	1.4509e-12	0.509136	0.868198
	Cluster-1	-0.0528417	0.0943886	-0.559831	0.576231	-0.238983	0.1333
	Cluster-2	0.0172396	0.0920971	0.187189	0.851705	-0.164383	0.198862
	Cluster-3	0.0679667	0.0954798	0.711843	0.477404	-0.120327	0.25626
	Cluster-4	0	0
	Equation of the model (La3T):
	La3T = 0.688666666666678-5.28416666666776E-02*Cluster-1+1.72395833333222E-02*Cluster-2+6.79666666666554E-02*Cluster-3
	Interpretation (La3T):
	Given the R2, 5% of the variability of the dependent variable La3T is explained by the explanatory variable.
	Given the p-value of the F statistic computed in the ANOVA table, and given the significance level of 5%, the information brought by the explanatory variables is significantly better than what a basic mean would bring.
	Means charts:
	Cluster / Duncan / Analysis of the differences between the categories with a confidence interval of 95% (La3T):
	Contrast	Difference	Standardized difference	Critical value	Pr > Diff	alpha (Modified)	Significant
	3 vs 1	0.120808	3.17222	3.03363	0.0094318	0.142625	Yes
	3 vs 4	0.0679667	0.711843	2.93572	0.756785	0.0975	No
	3 vs 2	0.0507271	1.58599	2.78894	0.114345	0.05	No
	2 vs 1	0.0700812	2.45361	2.93572	0.0396555	0.0975	Yes
	2 vs 4	0.0172396	0.187189	2.78894	0.851705	0.05	No
	4 vs 1	0.0528417	0.559831	2.78894	0.576231	0.05	No
	Category	LS means	Standard error	Lower bound (95%)	Upper bound (95%)	Groups
	3	0.756633	0.0287882	0.699861	0.813406	A
	2	0.705906	0.0139371	0.678421	0.733391	A
	4	0.688667	0.0910364	0.509136	0.868198	A	B
	1	0.635825	0.0249314	0.586658	0.684992		B
	Regression of variable La4T:
	Goodness of fit statistics (La4T):
	Observations	201
	Sum of weights	201
	DF	197
	R²	0.0459343
	Adjusted R²	0.0314054
	MSE	0.0312623
	RMSE	0.176811
	MAPE
	DW
	Cp	4
	AIC	-692.574
	SBC	-679.361
	PC	0.992809
	Analysis of variance (La4T):
	Source	DF	Sum of squares	Mean squares	F	Pr > F
	Model	3	0.296515	0.0988382	3.16158	0.0257103
	Error	197	6.15867	0.0312623
	Corrected Total	200	6.45518
	Computed against model Y=Mean(Y)
	Model parameters (La4T):
	Source	Value	Standard error	t	Pr > |t|	Lower bound (95%)	Upper bound (95%)
	Intercept	0.521	0.102082	5.10374	7.81537e-07	0.319686	0.722314
	Cluster-1	-0.052425	0.105841	-0.495319	0.620927	-0.261152	0.156302
	Cluster-2	0.0458828	0.103271	0.444293	0.657318	-0.157777	0.249542
	Cluster-3	0.0264667	0.107065	0.247203	0.805009	-0.184673	0.237607
	Cluster-4	0	0
	Equation of the model (La4T):
	La4T = 0.520999999999998-5.24249999999976E-02*Cluster-1+4.58828125000023E-02*Cluster-2+2.64666666666689E-02*Cluster-3
	Interpretation (La4T):
	Given the R2, 5% of the variability of the dependent variable La4T is explained by the explanatory variable.
	Given the p-value of the F statistic computed in the ANOVA table, and given the significance level of 5%, the information brought by the explanatory variables is significantly better than what a basic mean would bring.
	Means charts:
	Cluster / Duncan / Analysis of the differences between the categories with a confidence interval of 95% (La4T):
	Contrast	Difference	Standardized difference	Critical value	Pr > Diff	alpha (Modified)	Significant
	2 vs 1	0.0983078	3.06943	3.03363	0.0129701	0.142625	Yes
	2 vs 4	0.0458828	0.444293	2.93572	0.896977	0.0975	No
	2 vs 3	0.0194161	0.541365	2.78894	0.588868	0.05	No
	3 vs 1	0.0788917	1.84741	2.93572	0.157039	0.0975	No
	3 vs 4	0.0264667	0.247203	2.78894	0.805009	0.05	No
	4 vs 1	0.052425	0.495319	2.78894	0.620927	0.05	No
	Category	LS means	Standard error	Lower bound (95%)	Upper bound (95%)	Groups
	2	0.566883	0.0156281	0.536063	0.597703	A
	3	0.547467	0.0322812	0.483806	0.611128	A	B
	4	0.521	0.102082	0.319686	0.722314	A	B
	1	0.468575	0.0279563	0.413443	0.523707		B
	Regression of variable LoYc:
	Goodness of fit statistics (LoYc):
	Observations	201
	Sum of weights	201
	DF	197
	R²	0.663653
	Adjusted R²	0.658531
	MSE	0.0399696
	RMSE	0.199924
	MAPE
	DW
	Cp	4
	AIC	-643.187
	SBC	-629.974
	PC	0.350006
	Analysis of variance (LoYc):
	Source	DF	Sum of squares	Mean squares	F	Pr > F
	Model	3	15.5364	5.17879	129.568	2.24637e-46
	Error	197	7.87401	0.0399696
	Corrected Total	200	23.4104
	Computed against model Y=Mean(Y)
	Model parameters (LoYc):
	Source	Value	Standard error	t	Pr > |t|	Lower bound (95%)	Upper bound (95%)
	Intercept	1.693	0.115426	14.6674	2.07573e-33	1.46537	1.92063
	Cluster-1	-0.932775	0.119676	-7.79414	3.65707e-13	-1.16879	-0.696764
	Cluster-2	-0.515609	0.116771	-4.41556	1.6595e-05	-0.745891	-0.285328
	Cluster-3	-0.00643333	0.12106	-0.0531417	0.957673	-0.245173	0.232307
	Cluster-4	0	0
	Equation of the model (LoYc):
	LoYc = 1.69299999999999-0.93277499999999*Cluster-1-0.515609374999991*Cluster-2-6.43333333332454E-03*Cluster-3
	Interpretation (LoYc):
	Given the R2, 66% of the variability of the dependent variable LoYc is explained by the explanatory variable.
	Given the p-value of the F statistic computed in the ANOVA table, and given the significance level of 5%, the information brought by the explanatory variables is significantly better than what a basic mean would bring.
	Means charts:
	Cluster / Duncan / Analysis of the differences between the categories with a confidence interval of 95% (LoYc):
	Contrast	Difference	Standardized difference	Critical value	Pr > Diff	alpha (Modified)	Significant
	4 vs 1	0.932775	7.79414	3.03363	1.99618e-12	0.142625	Yes
	4 vs 2	0.515609	4.41556	2.93572	4.91932e-05	0.0975	Yes
	4 vs 3	0.00643333	0.0531417	2.78894	0.957673	0.05	No
	3 vs 1	0.926342	19.1844	2.93572	0	0.0975	Yes
	3 vs 2	0.509176	12.5557	2.78894	0	0.05	Yes
	2 vs 1	0.417166	11.5192	2.78894	0	0.05	Yes
	Category	LS means	Standard error	Lower bound (95%)	Upper bound (95%)	Groups
	4	1.693	0.115426	1.46537	1.92063	A
	3	1.68657	0.036501	1.61458	1.75855	A
	2	1.17739	0.017671	1.14254	1.21224		B
	1	0.760225	0.0316108	0.697886	0.822564			C
	Regression of variable LaYc:
	Goodness of fit statistics (LaYc):
	Observations	201
	Sum of weights	201
	DF	197
	R²	0.0190236
	Adjusted R²	0.00408484
	MSE	0.0512227
	RMSE	0.226324
	MAPE
	DW
	Cp	4
	AIC	-593.327
	SBC	-580.113
	PC	1.02081
	Analysis of variance (LaYc):
	Source	DF	Sum of squares	Mean squares	F	Pr > F
	Model	3	0.195687	0.065229	1.27344	0.284664
	Error	197	10.0909	0.0512227
	Corrected Total	200	10.2866
	Computed against model Y=Mean(Y)
	Model parameters (LaYc):
	Source	Value	Standard error	t	Pr > |t|	Lower bound (95%)	Upper bound (95%)
	Intercept	0.601	0.130668	4.59943	7.5693e-06	0.343312	0.858688
	Cluster-1	-0.23	0.13548	-1.69767	0.0911492	-0.497177	0.037177
	Cluster-2	-0.176613	0.132191	-1.33605	0.183075	-0.437304	0.0840774
	Cluster-3	-0.197167	0.137046	-1.43869	0.151826	-0.467432	0.0730992
	Cluster-4	0	0
	Equation of the model (LaYc):
	LaYc = 0.600999999999997-0.229999999999997*Cluster-1-0.176613281249998*Cluster-2-0.197166666666664*Cluster-3
	Interpretation (LaYc):
	Given the R2, 2% of the variability of the dependent variable LaYc is explained by the explanatory variable.
	Given the p-value of the F statistic computed in the ANOVA table, and given the significance level of 5%, the information brought by the explanatory variables is not significantly better than what a basic mean would bring. The fact that variables do not bring significant information to the model may be interpreted in different ways: Either the variables do not contribute to the model, or some cov…
	Means charts:
	Cluster / Duncan / Analysis of the differences between the categories with a confidence interval of 95% (LaYc):
	Contrast	Difference	Standardized difference	Critical value	Pr > Diff	alpha (Modified)	Significant
	4 vs 1	0.23	1.69767	3.03363	0.327653	0.142625	No
	4 vs 3	0.197167	1.43869	2.93572	0.323099	0.0975	No
	4 vs 2	0.176613	1.33605	2.78894	0.183075	0.05	No
	2 vs 1	0.0533867	1.30221	2.93572	0.395635	0.0975	No
	2 vs 3	0.0205534	0.447702	2.78894	0.65486	0.05	No
	3 vs 1	0.0328333	0.600656	2.78894	0.54876	0.05	No
	Category	LS means	Standard error	Lower bound (95%)	Upper bound (95%)	Groups
	4	0.601	0.130668	0.343312	0.858688	A
	2	0.424387	0.0200044	0.384936	0.463837	A
	3	0.403833	0.041321	0.322345	0.485322	A
	1	0.371	0.035785	0.300429	0.441571	A
	Regression of variable NC:
	Goodness of fit statistics (NC):
	Observations	201
	Sum of weights	201
	DF	197
	R²	0.155342
	Adjusted R²	0.142479
	MSE	0.204653
	RMSE	0.452386
	MAPE
	DW
	Cp	4
	AIC	-314.915
	SBC	-301.701
	PC	0.878959
	Analysis of variance (NC):
	Source	DF	Sum of squares	Mean squares	F	Pr > F
	Model	3	7.41468	2.47156	12.0768	2.72871e-07
	Error	197	40.3167	0.204653
	Corrected Total	200	47.7313
	Computed against model Y=Mean(Y)
	Model parameters (NC):
	Source	Value	Standard error	t	Pr > |t|	Lower bound (95%)	Upper bound (95%)
	Intercept	6	0.261185	22.9722	1.25966e-57	5.48492	6.51508
	Cluster-1	0.925	0.270803	3.41577	0.000772378	0.390956	1.45904
	Cluster-2	0.59375	0.264228	2.24711	0.025742	0.072671	1.11483
	Cluster-3	0.333333	0.273933	1.21684	0.225121	-0.206885	0.873552
	Cluster-4	0	0
	Equation of the model (NC):
	NC = 6+0.925000000000001*Cluster-1+0.593750000000001*Cluster-2+0.333333333333336*Cluster-3
	Interpretation (NC):
	Given the R2, 16% of the variability of the dependent variable NC is explained by the explanatory variable.
	Given the p-value of the F statistic computed in the ANOVA table, and given the significance level of 5%, the information brought by the explanatory variables is significantly better than what a basic mean would bring.
	Means charts:
	Cluster / Duncan / Analysis of the differences between the categories with a confidence interval of 95% (NC):
	Contrast	Difference	Standardized difference	Critical value	Pr > Diff	alpha (Modified)	Significant
	1 vs 4	0.925	3.41577	3.03363	0.00426624	0.142625	Yes
	1 vs 3	0.591667	5.41514	2.93572	5.29842e-07	0.0975	Yes
	1 vs 2	0.33125	4.04229	2.78894	7.58839e-05	0.05	Yes
	2 vs 4	0.59375	2.24711	2.93572	0.0659575	0.0975	Yes
	2 vs 3	0.260417	2.8379	2.78894	0.00501659	0.05	Yes
	3 vs 4	0.333333	1.21684	2.78894	0.225121	0.05	No
	Category	LS means	Standard error	Lower bound (95%)	Upper bound (95%)	Groups
	1	6.925	0.0715285	6.78394	7.06606	A
	2	6.59375	0.0399857	6.5149	6.6726		B
	3	6.33333	0.082594	6.17045	6.49622			C
	4	6	0.261185	5.48492	6.51508			C
	Summary for all Ys:
		LoCo	LoAb	LoThx	LoT	LaT	LoAn	LoAA	LaAA	LoAP	LaAP	LoF	LoTi	LaTi	LoM	LaM	DoD	DooD	La1T	La2T	La3T	La4T	LoYc	LaYc	NC
	R²	0.231064	0.187231	0.0174339	0.813935	0.824436	0.572822	0.699076	0.622413	0.0828795	0.253858	0.0801166	0.344133	0.318944	0.992978	0.262472	0.340232	0.505731	0.0757196	0.217893	0.0514558	0.0459343	0.663653	0.0190236	0.155342
	F	19.7327	15.127	1.16514	287.256	308.367	88.0554	152.55	108.245	5.93425	22.3415	5.71919	34.4552	30.7522	9286.48	23.3696	33.8633	67.1894	5.37959	18.2945	3.56222	3.16158	129.568	1.27344	12.0768
	Pr > F	3.16215e-11	6.72946e-09	0.324212	1.17114e-71	3.85644e-74	3.51894e-36	3.99948e-51	1.92909e-41	0.000678342	1.70742e-12	0.000898569	6.02088e-18	2.37556e-16	8.37597e-212	5.52752e-13	1.07376e-17	5.75859e-30	0.00140165	1.63796e-10	0.0152214	0.0257103	2.24637e-46	0.284664	2.72871e-07
	Summary of all pairwise comparisons for Cluster (Duncan):
	Category	LS means(LoCo)	Groups
	3	6.343	A
	4	6.23	A	B
	2	5.58508		B
	1	5.33385			C
	Category	LS means(LoAb)	Groups
	3	3.62093	A
	4	3.50333	A	B
	2	3.23596		B
	1	3.0323			C
	Category	LS means(LoThx)	Groups
	3	1.62463	A
	4	1.57633	A
	2	1.53312	A
	1	1.5179	A
	Category	LS means(LoT)	Groups
	4	3.83667	A
	3	2.20344		B
	2	1.48204			C
	1	1.09068				D
	Category	LS means(LaT)	Groups
	4	3.43	A
	3	2.83297		B
	2	1.88574			C
	1	1.5274				D
	Category	LS means(LoAn)	Groups
	4	3.08667	A
	3	2.9724	A
	2	1.98568		B
	1	1.51828			C
	Category	LS means(LoAA)	Groups
	4	6.41333	A
	3	4.86763		B
	2	4.56437			C
	1	3.35712				D
	Category	LS means(LaAA)	Groups
	3	1.86337	A
	4	1.68333	A	B
	2	1.55155		B
	1	0.849			C
	Category	LS means(LoAP)	Groups
	4	4.24	A
	2	3.32954		B
	3	3.3044		B
	1	3.18845		B
	Category	LS means(LaAP)	Groups
	4	1.52	A
	1	0.981027		B
	3	0.831167			C
	2	0.801141			C
	Category	LS means(LoF)	Groups
	4	1.62033	A
	2	1.50237	A	B
	1	1.41458		B
	3	1.3436		B
	Category	LS means(LoTi)	Groups
	4	1.952	A
	2	1.87301	A	B
	3	1.71157		B
	1	1.5254			C
	Category	LS means(LaTi)	Groups
	4	0.792333	A
	2	0.677844		B
	3	0.584433			C
	1	0.551525			C
	Category	LS means(LoM)	Groups
	4	8.44567	A
	2	0.614187		B
	3	0.551167			C
	1	0.496325				D
	Category	LS means(LaM)	Groups
	4	0.581	A
	2	0.350672		B
	1	0.34065		B
	3	0.255333			C
	Category	LS means(DoD)	Groups
	3	0.5345	A
	4	0.476333	A	B
	2	0.398945		B
	1	0.343025			C
	Category	LS means(DooD)	Groups
	3	0.4948	A
	4	0.469667	A
	2	0.373753		B
	1	0.3162			C
	Category	LS means(La1T)	Groups
	3	1.04837	A
	2	0.971281	A
	4	0.865	A	B
	1	0.86175		B
	Category	LS means(La2T)	Groups
	3	1.0229	A
	2	0.903914	A
	1	0.7677		B
	4	0.760333		B
	Category	LS means(La3T)	Groups
	3	0.756633	A
	2	0.705906	A
	4	0.688667	A	B
	1	0.635825		B
	Category	LS means(La4T)	Groups
	2	0.566883	A
	3	0.547467	A	B
	4	0.521	A	B
	1	0.468575		B
	Category	LS means(LoYc)	Groups
	4	1.693	A
	3	1.68657	A
	2	1.17739		B
	1	0.760225			C
	Category	LS means(LaYc)	Groups
	4	0.601	A
	2	0.424387	A
	3	0.403833	A
	1	0.371	A
	Category	LS means(NC)	Groups
	1	6.925	A
	2	6.59375		B
	3	6.33333			C
	4	6			C
	Summary (LS means) - Cluster:
		LoCo	LoAb	LoThx	LoT	LaT	LoAn	LoAA	LaAA	LoAP	LaAP	LoF	LoTi	LaTi	LoM	LaM	DoD	DooD	La1T	La2T	La3T	La4T	LoYc	LaYc	NC
	4	6.23	3.50333	1.57633	3.83667	3.43	3.08667	6.41333	1.68333	4.24	1.52	1.62033	1.952	0.792333	8.44567	0.581	0.476333	0.469667	0.865	0.760333	0.688667	0.521	1.693	0.601	6
	3	6.343	3.62093	1.62463	2.20344	2.83297	2.9724	4.86763	1.86337	3.3044	0.831167	1.3436	1.71157	0.584433	0.551167	0.255333	0.5345	0.4948	1.04837	1.0229	0.756633	0.547467	1.68657	0.403833	6.33333
	2	5.58508	3.23596	1.53312	1.48204	1.88574	1.98568	4.56437	1.55155	3.32954	0.801141	1.50237	1.87301	0.677844	0.614187	0.350672	0.398945	0.373753	0.971281	0.903914	0.705906	0.566883	1.17739	0.424387	6.59375
	1	5.33385	3.0323	1.5179	1.09068	1.5274	1.51828	3.35712	0.849	3.18845	0.981027	1.41458	1.5254	0.551525	0.496325	0.34065	0.343025	0.3162	0.86175	0.7677	0.635825	0.468575	0.760225	0.371	6.925
	Pr > F(Model)	3.16215e-11	6.72946e-09	0.324212	1.17114e-71	3.85644e-74	3.51894e-36	3.99948e-51	1.92909e-41	0.000678342	1.70742e-12	0.000898569	6.02088e-18	2.37556e-16	8.37597e-212	5.52752e-13	1.07376e-17	5.75859e-30	0.00140165	1.63796e-10	0.0152214	0.0257103	2.24637e-46	0.284664	2.72871e-07
	Significant	Yes	Yes	No	Yes	Yes	Yes	Yes	Yes	Yes	Yes	Yes	Yes	Yes	Yes	Yes	Yes	Yes	Yes	Yes	Yes	Yes	Yes	No	Yes
		LoCo	LoAb	LoThx	LoT	LaT	LoAn	LoAA	LaAA	LoAP	LaAP	LoF	LoTi	LaTi	LoM	LaM	DoD	DooD	La1T	La2T	La3T	La4T	LoYc	LaYc	NC
	4	6.23	3.50333	1.57633	3.83667	3.43	3.08667	6.41333	1.68333	4.24	1.52	1.62033	1.952	0.792333	8.44567	0.581	0.476333	0.469667	0.865	0.760333	0.688667	0.521	1.693	0.601	6
	3	6.343	3.62093	1.62463	2.20344	2.83297	2.9724	4.86763	1.86337	3.3044	0.831167	1.3436	1.71157	0.584433	0.551167	0.255333	0.5345	0.4948	1.04837	1.0229	0.756633	0.547467	1.68657	0.403833	6.33333
	2	5.58508	3.23596	1.53312	1.48204	1.88574	1.98568	4.56437	1.55155	3.32954	0.801141	1.50237	1.87301	0.677844	0.614187	0.350672	0.398945	0.373753	0.971281	0.903914	0.705906	0.566883	1.17739	0.424387	6.59375
	1	5.33385	3.0323	1.5179	1.09068	1.5274	1.51828	3.35712	0.849	3.18845	0.981027	1.41458	1.5254	0.551525	0.496325	0.34065	0.343025	0.3162	0.86175	0.7677	0.635825	0.468575	0.760225	0.371	6.925

## Sheet: XLSTAT_20220714_123546_1_HID1
	LoCo
4	0
3	0
2	0
1	0

## Sheet: XLSTAT_20220714_123546_1_HID
	Category	LS mean	Standard error	Lower bound (95%)	Upper bound (95%)
	1	5.33385	0.0917697	5.15287	5.51483
	2	5.58508	0.0513008	5.48391	5.68625
	3	6.343	0.105967	6.13403	6.55197
	4	6.23	0.335096	5.56917	6.89083
	Category	LS mean	Standard error	Lower bound (95%)	Upper bound (95%)
	1	3.0323	0.0585915	2.91676	3.14785
	2	3.23596	0.0327536	3.17137	3.30055
	3	3.62093	0.0676556	3.48751	3.75436
	4	3.50333	0.213946	3.08142	3.92525
	Category	LS mean	Standard error	Lower bound (95%)	Upper bound (95%)
	1	1.5179	0.0414789	1.4361	1.5997
	2	1.53312	0.0231874	1.48739	1.57885
	3	1.62463	0.0478957	1.53018	1.71909
	4	1.57633	0.15146	1.27764	1.87502
	Category	LS mean	Standard error	Lower bound (95%)	Upper bound (95%)
	1	1.09068	0.0329938	1.02561	1.15574
	2	1.48204	0.0184441	1.44567	1.51841
	3	2.20344	0.038098	2.12831	2.27857
	4	3.83667	0.120476	3.59908	4.07426
	Category	LS mean	Standard error	Lower bound (95%)	Upper bound (95%)
	1	1.5274	0.0318191	1.46465	1.59015
	2	1.88574	0.0177874	1.85066	1.92082
	3	2.83297	0.0367415	2.76051	2.90542
	4	3.43	0.116187	3.20087	3.65913
	Category	LS mean	Standard error	Lower bound (95%)	Upper bound (95%)
	1	1.51828	0.0619703	1.39606	1.64049
	2	1.98568	0.0346425	1.91736	2.054
	3	2.9724	0.0715572	2.83128	3.11352
	4	3.08667	0.226284	2.64042	3.53292
	Category	LS mean	Standard error	Lower bound (95%)	Upper bound (95%)
	1	3.35712	0.0598995	3.239	3.47525
	2	4.56437	0.0334848	4.49834	4.63041
	3	4.86763	0.069166	4.73123	5.00403
	4	6.41333	0.218722	5.982	6.84467
	Category	LS mean	Standard error	Lower bound (95%)	Upper bound (95%)
	1	0.849	0.0402431	0.769637	0.928363
	2	1.55155	0.0224966	1.50718	1.59591
	3	1.86337	0.0464687	1.77173	1.95501
	4	1.68333	0.146947	1.39354	1.97312
	Category	LS mean	Standard error	Lower bound (95%)	Upper bound (95%)
	1	3.18845	0.0674021	3.05553	3.32137
	2	3.32954	0.0376789	3.25523	3.40384
	3	3.3044	0.0778292	3.15091	3.45789
	4	4.24	0.246118	3.75464	4.72536
	Category	LS mean	Standard error	Lower bound (95%)	Upper bound (95%)
	1	0.981027	0.0295983	0.922657	1.0394
	2	0.801141	0.016546	0.768511	0.833771
	3	0.831167	0.0341772	0.763767	0.898567
	4	1.52	0.108078	1.30686	1.73314
	Category	LS mean	Standard error	Lower bound (95%)	Upper bound (95%)
	1	1.41458	0.0340162	1.34749	1.48166
	2	1.50237	0.0190156	1.46487	1.53987
	3	1.3436	0.0392785	1.26614	1.42106
	4	1.62033	0.12421	1.37538	1.86528
	Category	LS mean	Standard error	Lower bound (95%)	Upper bound (95%)
	1	1.5254	0.0308271	1.46461	1.58619
	2	1.87301	0.0172329	1.83902	1.90699
	3	1.71157	0.0355961	1.64137	1.78176
	4	1.952	0.112565	1.73001	2.17399
	Category	LS mean	Standard error	Lower bound (95%)	Upper bound (95%)
	1	0.551525	0.0133595	0.525179	0.577871
	2	0.677844	0.00746821	0.663116	0.692572
	3	0.584433	0.0154263	0.554012	0.614855
	4	0.792333	0.0487821	0.696131	0.888536
	Category	LS mean	Standard error	Lower bound (95%)	Upper bound (95%)
	1	0.496325	0.0128235	0.471036	0.521614
	2	0.614187	0.00716858	0.60005	0.628325
	3	0.551167	0.0148074	0.521965	0.580368
	4	8.44567	0.046825	8.35332	8.53801
	Category	LS mean	Standard error	Lower bound (95%)	Upper bound (95%)
	1	0.34065	0.0119876	0.317009	0.364291
	2	0.350672	0.00670128	0.337456	0.363887
	3	0.255333	0.0138421	0.228036	0.282631
	4	0.581	0.0437726	0.494677	0.667323
	Category	LS mean	Standard error	Lower bound (95%)	Upper bound (95%)
	1	0.343025	0.0128706	0.317643	0.368407
	2	0.398945	0.00719491	0.384756	0.413134
	3	0.5345	0.0148617	0.505191	0.563809
	4	0.476333	0.046997	0.383652	0.569015
	Category	LS mean	Standard error	Lower bound (95%)	Upper bound (95%)
	1	0.3162	0.00853002	0.299378	0.333022
	2	0.373753	0.00476843	0.364349	0.383157
	3	0.4948	0.00984962	0.475376	0.514224
	4	0.469667	0.0311472	0.408242	0.531091
	Category	LS mean	Standard error	Lower bound (95%)	Upper bound (95%)
	1	0.86175	0.0320636	0.798518	0.924982
	2	0.971281	0.0179241	0.935933	1.00663
	3	1.04837	0.0370239	0.975353	1.12138
	4	0.865	0.11708	0.634109	1.09589
	Category	LS mean	Standard error	Lower bound (95%)	Upper bound (95%)
	1	0.7677	0.0234012	0.721551	0.813849
	2	0.903914	0.0130817	0.878116	0.929712
	3	1.0229	0.0270214	0.969612	1.07619
	4	0.760333	0.085449	0.591821	0.928846
	Category	LS mean	Standard error	Lower bound (95%)	Upper bound (95%)
	1	0.635825	0.0249314	0.586658	0.684992
	2	0.705906	0.0139371	0.678421	0.733391
	3	0.756633	0.0287882	0.699861	0.813406
	4	0.688667	0.0910364	0.509136	0.868198
	Category	LS mean	Standard error	Lower bound (95%)	Upper bound (95%)
	1	0.468575	0.0279563	0.413443	0.523707
	2	0.566883	0.0156281	0.536063	0.597703
	3	0.547467	0.0322812	0.483806	0.611128
	4	0.521	0.102082	0.319686	0.722314
	Category	LS mean	Standard error	Lower bound (95%)	Upper bound (95%)
	1	0.760225	0.0316108	0.697886	0.822564
	2	1.17739	0.017671	1.14254	1.21224
	3	1.68657	0.036501	1.61458	1.75855
	4	1.693	0.115426	1.46537	1.92063
	Category	LS mean	Standard error	Lower bound (95%)	Upper bound (95%)
	1	0.371	0.035785	0.300429	0.441571
	2	0.424387	0.0200044	0.384936	0.463837
	3	0.403833	0.041321	0.322345	0.485322
	4	0.601	0.130668	0.343312	0.858688
	Category	LS mean	Standard error	Lower bound (95%)	Upper bound (95%)
	1	6.925	0.0715285	6.78394	7.06606
	2	6.59375	0.0399857	6.5149	6.6726
	3	6.33333	0.082594	6.17045	6.49622
	4	6	0.261185	5.48492	6.51508

## Sheet: ANOVA
	You are using the XLSTAT trial version. Number of days remaining until the trial expires: 14
	XLSTAT 2022.3.1.1330 - ANOVA - Start time: 07/14/2022 at 12:21:17 / End time: 07/14/2022 at 12:21:30 / Microsoft Excel 16.015225
	Y / Dependent variables: Workbook = Results morphobiometry.xlsx / Sheet = Dactylurina / Range = 'Dactylurina'!$B$1:$Y$202 / 201 rows and 24 columns
	X / Qualitative: Workbook = Results morphobiometry.xlsx / Sheet = Dactylurina / Range = 'Dactylurina'!$A$1:$A$202 / 201 rows and 1 column
	Constraints: an=0
	Confidence interval (%): 95
	Tolerance: 0.0001
	Use least squares means: Yes
	Regression of variable LoCo:
	Goodness of fit statistics (LoCo):
	Observations	201
	Sum of weights	201
	DF	196
	R²	0.0804916
	Adjusted R²	0.0617262
	MSE	0.404887
	RMSE	0.636308
	MAPE
	DW
	Cp	5
	AIC	-176.797
	SBC	-160.28
	PC	0.966422
	Analysis of variance (LoCo):
	Source	DF	Sum of squares	Mean squares	F	Pr > F
	Model	4	6.94681	1.7367	4.28935	0.0023838
	Error	196	79.3579	0.404887
	Corrected Total	200	86.3047
	Computed against model Y=Mean(Y)
	Model parameters (LoCo):
	Source	Value	Standard error	t	Pr > |t|	Lower bound (95%)	Upper bound (95%)
	Intercept	5.76356	0.0734745	78.443	5.44368e-150	5.61866	5.90846
	Locality-Ebang	-0.08856	0.13292	-0.666264	0.506026	-0.350698	0.173578
	Locality-Mbankomo	-0.361503	0.130256	-2.77532	0.00604876	-0.618387	-0.104619
	Locality-Messassi	0.0602257	0.122632	0.491108	0.623899	-0.181622	0.302074
	Locality-Nkolbissong	-0.512872	0.175225	-2.92693	0.00382793	-0.858442	-0.167303
	Locality-Nkometou	0	0
	Equation of the model (LoCo):
	LoCo = 5.76356-8.85599999999971E-02*Locality-Ebang-0.361502857142853*Locality-Mbankomo+6.02257142857182E-02*Locality-Messassi-0.512872499999997*Locality-Nkolbissong
	Interpretation (LoCo):
	Given the R2, 8% of the variability of the dependent variable LoCo is explained by the explanatory variable.
	Given the p-value of the F statistic computed in the ANOVA table, and given the significance level of 5%, the information brought by the explanatory variables is significantly better than what a basic mean would bring.
	Means charts:
	Locality / Duncan / Analysis of the differences between the categories with a confidence interval of 95% (LoCo):
	Contrast	Difference	Standardized difference	Critical value	Pr > Diff	alpha (Modified)	Significant
	Messassi vs Nkolbissong	0.573098	3.06572	3.10578	0.020683	0.185494	Yes
	Messassi vs Mbankomo	0.421729	2.89587	3.03371	0.0217255	0.142625	Yes
	Messassi vs Ebang	0.148786	1.00518	2.93581	0.574469	0.0975	No
	Messassi vs Nkometou	0.0602257	0.491108	2.78903	0.623899	0.05	No
	Nkometou vs Nkolbissong	0.512872	2.92693	3.03371	0.0198538	0.142625	Yes
	Nkometou vs Mbankomo	0.361503	2.77532	2.93581	0.016587	0.0975	Yes
	Nkometou vs Ebang	0.08856	0.666264	2.78903	0.506026	0.05	No
	Ebang vs Nkolbissong	0.424313	2.18896	2.93581	0.0755725	0.0975	Yes
	Ebang vs Mbankomo	0.272943	1.76783	2.78903	0.0786447	0.05	No
	Mbankomo vs Nkolbissong	0.15137	0.78828	2.78903	0.431485	0.05	No
	Category	LS means	Standard error	Lower bound (95%)	Upper bound (95%)	Groups
	Messassi	5.82379	0.0981844	5.63015	6.01742	A
	Nkometou	5.76356	0.0734745	5.61866	5.90846	A
	Ebang	5.675	0.110767	5.45655	5.89345	A	B
	Mbankomo	5.40206	0.107556	5.18994	5.61417		B	C
	Nkolbissong	5.25069	0.159077	4.93697	5.56441			C
	Regression of variable LoAb:
	Goodness of fit statistics (LoAb):
	Observations	201
	Sum of weights	201
	DF	196
	R²	0.0647767
	Adjusted R²	0.0456906
	MSE	0.158813
	RMSE	0.398514
	MAPE
	DW
	Cp	5
	AIC	-364.908
	SBC	-348.392
	PC	0.982939
	Analysis of variance (LoAb):
	Source	DF	Sum of squares	Mean squares	F	Pr > F
	Model	4	2.15599	0.538998	3.39391	0.0103723
	Error	196	31.1274	0.158813
	Corrected Total	200	33.2834
	Computed against model Y=Mean(Y)
	Model parameters (LoAb):
	Source	Value	Standard error	t	Pr > |t|	Lower bound (95%)	Upper bound (95%)
	Intercept	3.34863	0.0460164	72.7702	8.21119e-144	3.25788	3.43938
	Locality-Ebang	-0.0345358	0.0832469	-0.41486	0.678698	-0.19871	0.129639
	Locality-Mbankomo	-0.10457	0.0815784	-1.28183	0.201417	-0.265454	0.0563147
	Locality-Messassi	-0.197398	0.0768036	-2.57017	0.0109071	-0.348866	-0.0459306
	Locality-Nkolbissong	-0.334402	0.109742	-3.04716	0.00262851	-0.550829	-0.117975
	Locality-Nkometou	0	0
	Equation of the model (LoAb):
	LoAb = 3.34862666666667-3.45357575757597E-02*Locality-Ebang-0.104569523809527*Locality-Mbankomo-0.197398095238099*Locality-Messassi-0.33440166666667*Locality-Nkolbissong
	Interpretation (LoAb):
	Given the R2, 6% of the variability of the dependent variable LoAb is explained by the explanatory variable.
	Given the p-value of the F statistic computed in the ANOVA table, and given the significance level of 5%, the information brought by the explanatory variables is significantly better than what a basic mean would bring.
	Means charts:
	Locality / Duncan / Analysis of the differences between the categories with a confidence interval of 95% (LoAb):
	Contrast	Difference	Standardized difference	Critical value	Pr > Diff	alpha (Modified)	Significant
	Nkometou vs Nkolbissong	0.334402	3.04716	3.10578	0.0218579	0.185494	Yes
	Nkometou vs Messassi	0.197398	2.57017	3.03371	0.0527808	0.142625	Yes
	Nkometou vs Mbankomo	0.10457	1.28183	2.93581	0.407114	0.0975	No
	Nkometou vs Ebang	0.0345358	0.41486	2.78903	0.678698	0.05	No
	Ebang vs Nkolbissong	0.299866	2.47003	3.03371	0.0678654	0.142625	Yes
	Ebang vs Messassi	0.162862	1.75682	2.93581	0.187005	0.0975	No
	Ebang vs Mbankomo	0.0700338	0.72427	2.78903	0.469764	0.05	No
	Mbankomo vs Nkolbissong	0.229832	1.91107	2.93581	0.13824	0.0975	No
	Mbankomo vs Messassi	0.0928286	1.01777	2.78903	0.31004	0.05	No
	Messassi vs Nkolbissong	0.137004	1.1702	2.78903	0.243343	0.05	No
	Category	LS means	Standard error	Lower bound (95%)	Upper bound (95%)	Groups
	Nkometou	3.34863	0.0460164	3.25788	3.43938	A
	Ebang	3.31409	0.0693724	3.17728	3.4509	A	B
	Mbankomo	3.24406	0.0673612	3.11121	3.3769	A	B	C
	Messassi	3.15123	0.0614921	3.02996	3.2725		B	C
	Nkolbissong	3.01422	0.0996285	2.81774	3.21071			C
	Regression of variable LoThx:
	Goodness of fit statistics (LoThx):
	Observations	201
	Sum of weights	201
	DF	196
	R²	0.0525843
	Adjusted R²	0.0332492
	MSE	0.0666966
	RMSE	0.258257
	MAPE
	DW
	Cp	5
	AIC	-539.291
	SBC	-522.774
	PC	0.995753
	Analysis of variance (LoThx):
	Source	DF	Sum of squares	Mean squares	F	Pr > F
	Model	4	0.725563	0.181391	2.71964	0.0309089
	Error	196	13.0725	0.0666966
	Corrected Total	200	13.7981
	Computed against model Y=Mean(Y)
	Model parameters (LoThx):
	Source	Value	Standard error	t	Pr > |t|	Lower bound (95%)	Upper bound (95%)
	Intercept	1.60477	0.0298209	53.8134	2.33646e-119	1.54596	1.66358
	Locality-Ebang	-0.175918	0.0539481	-3.26088	0.00130981	-0.282311	-0.0695249
	Locality-Mbankomo	-0.0623667	0.0528669	-1.17969	0.239552	-0.166628	0.0418943
	Locality-Messassi	-0.0768143	0.0497725	-1.54331	0.124369	-0.174973	0.0213442
	Locality-Nkolbissong	-0.0575167	0.0711184	-0.808745	0.419642	-0.197772	0.0827389
	Locality-Nkometou	0	0
	Equation of the model (LoThx):
	LoThx = 1.60476666666667-0.175918181818182*Locality-Ebang-6.23666666666664E-02*Locality-Mbankomo-7.68142857142853E-02*Locality-Messassi-5.75166666666662E-02*Locality-Nkolbissong
	Interpretation (LoThx):
	Given the R2, 5% of the variability of the dependent variable LoThx is explained by the explanatory variable.
	Given the p-value of the F statistic computed in the ANOVA table, and given the significance level of 5%, the information brought by the explanatory variables is significantly better than what a basic mean would bring.
	Means charts:
	Locality / Duncan / Analysis of the differences between the categories with a confidence interval of 95% (LoThx):
	Contrast	Difference	Standardized difference	Critical value	Pr > Diff	alpha (Modified)	Significant
	Nkometou vs Ebang	0.175918	3.26088	3.10578	0.0113363	0.185494	Yes
	Nkometou vs Messassi	0.0768143	1.54331	3.03371	0.413718	0.142625	No
	Nkometou vs Mbankomo	0.0623667	1.17969	2.93581	0.466696	0.0975	No
	Nkometou vs Nkolbissong	0.0575167	0.808745	2.78903	0.419642	0.05	No
	Nkolbissong vs Ebang	0.118402	1.50496	3.03371	0.436477	0.142625	No
	Nkolbissong vs Messassi	0.0192976	0.254345	2.93581	0.964973	0.0975	No
	Nkolbissong vs Mbankomo	0.00485	0.0622298	2.78903	0.950443	0.05	No
	Mbankomo vs Ebang	0.113552	1.81208	2.93581	0.168281	0.0975	No
	Mbankomo vs Messassi	0.0144476	0.244432	2.78903	0.807152	0.05	No
	Messassi vs Ebang	0.0991039	1.64964	2.78903	0.100618	0.05	No
	Category	LS means	Standard error	Lower bound (95%)	Upper bound (95%)	Groups
	Nkometou	1.60477	0.0298209	1.54596	1.66358	A
	Nkolbissong	1.54725	0.0645642	1.41992	1.67458	A	B
	Mbankomo	1.5424	0.0436534	1.45631	1.62849	A	B
	Messassi	1.52795	0.0398499	1.44936	1.60654	A	B
	Ebang	1.42885	0.0449568	1.34019	1.51751		B
	Regression of variable LoT:
	Goodness of fit statistics (LoT):
	Observations	201
	Sum of weights	201
	DF	196
	R²	0.0400976
	Adjusted R²	0.0205077
	MSE	0.225786
	RMSE	0.47517
	MAPE
	DW
	Cp	5
	AIC	-294.185
	SBC	-277.668
	PC	1.00888
	Analysis of variance (LoT):
	Source	DF	Sum of squares	Mean squares	F	Pr > F
	Model	4	1.84861	0.462151	2.04686	0.0893435
	Error	196	44.2541	0.225786
	Corrected Total	200	46.1027
	Computed against model Y=Mean(Y)
	Model parameters (LoT):
	Source	Value	Standard error	t	Pr > |t|	Lower bound (95%)	Upper bound (95%)
	Intercept	1.62941	0.0548678	29.6971	1.76266e-74	1.52121	1.73762
	Locality-Ebang	0.00316242	0.0992597	0.0318601	0.974616	-0.192592	0.198917
	Locality-Mbankomo	-0.241242	0.0972703	-2.48012	0.0139769	-0.433073	-0.0494111
	Locality-Messassi	-0.149694	0.091577	-1.63463	0.103732	-0.330297	0.0309084
	Locality-Nkolbissong	-0.121538	0.130851	-0.928827	0.354121	-0.379596	0.136519
	Locality-Nkometou	0	0
	Equation of the model (LoT):
	LoT = 1.62941333333333+3.16242424242448E-03*Locality-Ebang-0.241241904761904*Locality-Mbankomo-0.149694285714285*Locality-Messassi-0.121538333333332*Locality-Nkolbissong
	Interpretation (LoT):
	Given the R2, 4% of the variability of the dependent variable LoT is explained by the explanatory variable.
	Given the p-value of the F statistic computed in the ANOVA table, and given the significance level of 5%, the information brought by the explanatory variables is not significantly better than what a basic mean would bring. The fact that variables do not bring significant information to the model may be interpreted in different ways: Either the variables do not contribute to the model, or some cov…
	Means charts:
	Groupings could not be performed with an exact method because the significance of differences is not transitive in this particular case. The harmonic mean of the group sizes needed to be used.
	Harmonic mean:		31.5423
	Locality / Duncan / Analysis of the differences between the categories with a confidence interval of 95% (LoT):
	Contrast	Difference	Standardized difference	Critical value	Pr > Diff	alpha (Modified)	Significant
	Ebang vs Mbankomo	0.244404	2.04264	3.10578	0.249733	0.185494	No
	Ebang vs Messassi	0.152857	1.27752	3.03371	0.578332	0.142625	No
	Ebang vs Nkolbissong	0.124701	1.0422	2.93581	0.551193	0.0975	No
	Ebang vs Nkometou	0.00316242	0.0264304	2.78903	0.978941	0.05	No
	Nkometou vs Mbankomo	0.241242	2.01621	3.03371	0.185521	0.142625	No
	Nkometou vs Messassi	0.149694	1.25109	2.93581	0.424689	0.0975	No
	Nkometou vs Nkolbissong	0.121538	1.01577	2.78903	0.31099	0.05	No
	Nkolbissong vs Mbankomo	0.119704	1.00044	2.93581	0.577462	0.0975	No
	Nkolbissong vs Messassi	0.028156	0.235317	2.78903	0.814208	0.05	No
	Messassi vs Mbankomo	0.0915476	0.765121	2.78903	0.44512	0.05	No
	Category	LS means	Standard error	Lower bound (95%)	Upper bound (95%)	Groups
	Ebang	1.63258	0.0827164	1.46945	1.7957	A
	Nkometou	1.62941	0.0548678	1.52121	1.73762	A
	Nkolbissong	1.50787	0.118792	1.2736	1.74215	A
	Messassi	1.47972	0.0733202	1.33512	1.62432	A
	Mbankomo	1.38817	0.0803183	1.22977	1.54657	A
	Regression of variable LaT:
	Goodness of fit statistics (LaT):
	Observations	201
	Sum of weights	201
	DF	196
	R²	0.135655
	Adjusted R²	0.118015
	MSE	0.200401
	RMSE	0.447661
	MAPE
	DW
	Cp	5
	AIC	-318.158
	SBC	-301.642
	PC	0.908445
	Analysis of variance (LaT):
	Source	DF	Sum of squares	Mean squares	F	Pr > F
	Model	4	6.16456	1.54114	7.6903	8.9231e-06
	Error	196	39.2785	0.200401
	Corrected Total	200	45.4431
	Computed against model Y=Mean(Y)
	Model parameters (LaT):
	Source	Value	Standard error	t	Pr > |t|	Lower bound (95%)	Upper bound (95%)
	Intercept	2.12139	0.0516915	41.0394	3.52626e-98	2.01944	2.22333
	Locality-Ebang	-0.0842338	0.0935134	-0.900768	0.368817	-0.268655	0.100188
	Locality-Mbankomo	-0.463785	0.0916392	-5.06099	9.57268e-07	-0.644511	-0.28306
	Locality-Messassi	-0.089933	0.0862754	-1.04239	0.298513	-0.26008	0.0802144
	Locality-Nkolbissong	-0.366198	0.123276	-2.97055	0.00334439	-0.609316	-0.12308
	Locality-Nkometou	0	0
	Equation of the model (LaT):
	LaT = 2.12138533333333-8.42338181818158E-02*Locality-Ebang-0.463785333333328*Locality-Mbankomo-8.99329523809479E-02*Locality-Messassi-0.366197833333328*Locality-Nkolbissong
	Interpretation (LaT):
	Given the R2, 14% of the variability of the dependent variable LaT is explained by the explanatory variable.
	Given the p-value of the F statistic computed in the ANOVA table, and given the significance level of 5%, the information brought by the explanatory variables is significantly better than what a basic mean would bring.
	Means charts:
	Groupings could not be performed with an exact method because the significance of differences is not transitive in this particular case. The harmonic mean of the group sizes needed to be used.
	Harmonic mean:		31.5423
	Locality / Duncan / Analysis of the differences between the categories with a confidence interval of 95% (LaT):
	Contrast	Difference	Standardized difference	Critical value	Pr > Diff	alpha (Modified)	Significant
	Nkometou vs Mbankomo	0.463785	4.11433	3.10578	0.000542975	0.185494	Yes
	Nkometou vs Nkolbissong	0.366198	3.24861	3.03371	0.00740181	0.142625	Yes
	Nkometou vs Messassi	0.089933	0.797813	2.93581	0.70481	0.0975	No
	Nkometou vs Ebang	0.0842338	0.747255	2.78903	0.455805	0.05	No
	Ebang vs Mbankomo	0.379552	3.36708	3.03371	0.00502511	0.142625	Yes
	Ebang vs Nkolbissong	0.281964	2.50136	2.93581	0.0350631	0.0975	Yes
	Ebang vs Messassi	0.00569913	0.0505581	2.78903	0.959729	0.05	No
	Messassi vs Mbankomo	0.373852	3.31652	2.93581	0.00310505	0.0975	Yes
	Messassi vs Nkolbissong	0.276265	2.4508	2.78903	0.0151306	0.05	Yes
	Nkolbissong vs Mbankomo	0.0975875	0.865718	2.78903	0.387703	0.05	No
	Category	LS means	Standard error	Lower bound (95%)	Upper bound (95%)	Groups
	Nkometou	2.12139	0.0516915	2.01944	2.22333	A
	Ebang	2.03715	0.0779278	1.88347	2.19084	A
	Messassi	2.03145	0.0690756	1.89523	2.16768	A
	Nkolbissong	1.75519	0.111915	1.53447	1.9759		B
	Mbankomo	1.6576	0.0756685	1.50837	1.80683		B
	Regression of variable LoAn:
	Goodness of fit statistics (LoAn):
	Observations	201
	Sum of weights	201
	DF	196
	R²	0.484157
	Adjusted R²	0.473629
	MSE	0.186443
	RMSE	0.431791
	MAPE
	DW
	Cp	5
	AIC	-332.668
	SBC	-316.152
	PC	0.542162
	Analysis of variance (LoAn):
	Source	DF	Sum of squares	Mean squares	F	Pr > F
	Model	4	34.2982	8.57455	45.9901	3.25102e-27
	Error	196	36.5429	0.186443
	Corrected Total	200	70.8411
	Computed against model Y=Mean(Y)
	Model parameters (LoAn):
	Source	Value	Standard error	t	Pr > |t|	Lower bound (95%)	Upper bound (95%)
	Intercept	2.37947	0.0498589	47.724	7.38174e-110	2.28114	2.4778
	Locality-Ebang	-0.260345	0.0901982	-2.88637	0.00433416	-0.438229	-0.0824619
	Locality-Mbankomo	-1.1265	0.0883904	-12.7445	0	-1.30081	-0.952177
	Locality-Messassi	-0.136086	0.0832168	-1.63531	0.103588	-0.300201	0.0280296
	Locality-Nkolbissong	-0.700529	0.118906	-5.89146	1.64315e-08	-0.935028	-0.46603
	Locality-Nkometou	0	0
	Equation of the model (LoAn):
	LoAn = 2.37946666666667-0.260345454545455*Locality-Ebang-1.12649523809524*Locality-Mbankomo-0.136085714285716*Locality-Messassi-0.700529166666668*Locality-Nkolbissong
	Interpretation (LoAn):
	Given the R2, 48% of the variability of the dependent variable LoAn is explained by the explanatory variable.
	Given the p-value of the F statistic computed in the ANOVA table, and given the significance level of 5%, the information brought by the explanatory variables is significantly better than what a basic mean would bring.
	Means charts:
	Locality / Duncan / Analysis of the differences between the categories with a confidence interval of 95% (LoAn):
	Contrast	Difference	Standardized difference	Critical value	Pr > Diff	alpha (Modified)	Significant
	Nkometou vs Mbankomo	1.1265	12.7445	3.10578	0	0.185494	Yes
	Nkometou vs Nkolbissong	0.700529	5.89146	3.03371	9.82951e-08	0.142625	Yes
	Nkometou vs Ebang	0.260345	2.88637	2.93581	0.0120103	0.0975	Yes
	Nkometou vs Messassi	0.136086	1.63531	2.78903	0.103588	0.05	No
	Messassi vs Mbankomo	0.99041	10.022	3.03371	0	0.142625	Yes
	Messassi vs Nkolbissong	0.564443	4.44957	2.93581	4.27481e-05	0.0975	Yes
	Messassi vs Ebang	0.12426	1.23711	2.78903	0.217527	0.05	No
	Ebang vs Mbankomo	0.86615	8.26715	2.93581	0	0.0975	Yes
	Ebang vs Nkolbissong	0.440184	3.34641	2.78903	0.000981243	0.05	Yes
	Nkolbissong vs Mbankomo	0.425966	3.26897	2.78903	0.00127484	0.05	Yes
	Category	LS means	Standard error	Lower bound (95%)	Upper bound (95%)	Groups
	Nkometou	2.37947	0.0498589	2.28114	2.4778	A
	Messassi	2.24338	0.0666268	2.11198	2.37478	A	B
	Ebang	2.11912	0.0751652	1.97088	2.26736		B
	Nkolbissong	1.67894	0.107948	1.46605	1.89183			C
	Mbankomo	1.25297	0.072986	1.10903	1.39691				D
	Regression of variable LoAA:
	Goodness of fit statistics (LoAA):
	Observations	201
	Sum of weights	201
	DF	196
	R²	0.11291
	Adjusted R²	0.0948065
	MSE	0.425234
	RMSE	0.652099
	MAPE
	DW
	Cp	5
	AIC	-166.942
	SBC	-150.425
	PC	0.932349
	Analysis of variance (LoAA):
	Source	DF	Sum of squares	Mean squares	F	Pr > F
	Model	4	10.6084	2.6521	6.23681	9.60175e-05
	Error	196	83.3458	0.425234
	Corrected Total	200	93.9542
	Computed against model Y=Mean(Y)
	Model parameters (LoAA):
	Source	Value	Standard error	t	Pr > |t|	Lower bound (95%)	Upper bound (95%)
	Intercept	4.44123	0.0752979	58.982	1.03344e-126	4.29273	4.58972
	Locality-Ebang	0.347652	0.136219	2.55215	0.011468	0.0790088	0.616295
	Locality-Mbankomo	-0.419941	0.133489	-3.14588	0.00191389	-0.6832	-0.156682
	Locality-Messassi	-0.141155	0.125676	-1.12317	0.262739	-0.389006	0.106695
	Locality-Nkolbissong	0.0163358	0.179574	0.0909698	0.927609	-0.33781	0.370481
	Locality-Nkometou	0	0
	Equation of the model (LoAA):
	LoAA = 4.44122666666666+0.347652121212124*Locality-Ebang-0.419940952380946*Locality-Mbankomo-0.141155238095232*Locality-Messassi+1.63358333333384E-02*Locality-Nkolbissong
	Interpretation (LoAA):
	Given the R2, 11% of the variability of the dependent variable LoAA is explained by the explanatory variable.
	Given the p-value of the F statistic computed in the ANOVA table, and given the significance level of 5%, the information brought by the explanatory variables is significantly better than what a basic mean would bring.
	Means charts:
	Locality / Duncan / Analysis of the differences between the categories with a confidence interval of 95% (LoAA):
	Contrast	Difference	Standardized difference	Critical value	Pr > Diff	alpha (Modified)	Significant
	Ebang vs Mbankomo	0.767593	4.85125	3.10578	2.44863e-05	0.185494	Yes
	Ebang vs Messassi	0.488807	3.22237	3.03371	0.00805117	0.142625	Yes
	Ebang vs Nkometou	0.347652	2.55215	2.93581	0.0306792	0.0975	Yes
	Ebang vs Nkolbissong	0.331316	1.66782	2.78903	0.0969492	0.05	No
	Nkolbissong vs Mbankomo	0.436277	2.21696	3.03371	0.122225	0.142625	Yes
	Nkolbissong vs Messassi	0.157491	0.822078	2.93581	0.689796	0.0975	No
	Nkolbissong vs Nkometou	0.0163358	0.0909698	2.78903	0.927609	0.05	No
	Nkometou vs Mbankomo	0.419941	3.14588	2.93581	0.00541285	0.0975	Yes
	Nkometou vs Messassi	0.141155	1.12317	2.78903	0.262739	0.05	No
	Messassi vs Mbankomo	0.278786	1.86797	2.78903	0.0632586	0.05	No
	Category	LS means	Standard error	Lower bound (95%)	Upper bound (95%)	Groups
	Ebang	4.78888	0.113516	4.56501	5.01275	A
	Nkolbissong	4.45756	0.163025	4.13605	4.77907	A	B
	Nkometou	4.44123	0.0752979	4.29273	4.58972		B
	Messassi	4.30007	0.100621	4.10163	4.49851		B	C
	Mbankomo	4.02129	0.110225	3.80391	4.23866			C
	Regression of variable LaAA:
	Goodness of fit statistics (LaAA):
	Observations	201
	Sum of weights	201
	DF	196
	R²	0.193879
	Adjusted R²	0.177427
	MSE	0.139007
	RMSE	0.372836
	MAPE
	DW
	Cp	5
	AIC	-391.683
	SBC	-375.167
	PC	0.84725
	Analysis of variance (LaAA):
	Source	DF	Sum of squares	Mean squares	F	Pr > F
	Model	4	6.55273	1.63818	11.7849	1.34358e-08
	Error	196	27.2453	0.139007
	Corrected Total	200	33.7981
	Computed against model Y=Mean(Y)
	Model parameters (LaAA):
	Source	Value	Standard error	t	Pr > |t|	Lower bound (95%)	Upper bound (95%)
	Intercept	1.53713	0.0430514	35.7046	1.01455e-87	1.45223	1.62204
	Locality-Ebang	0.127382	0.0778829	1.63556	0.103538	-0.0262143	0.280978
	Locality-Mbankomo	-0.436533	0.076322	-5.71963	3.94128e-08	-0.587051	-0.286016
	Locality-Messassi	-0.0388	0.0718548	-0.539978	0.589825	-0.180508	0.102908
	Locality-Nkolbissong	-0.171883	0.102671	-1.67412	0.0957026	-0.374365	0.0305985
	Locality-Nkometou	0	0
	Equation of the model (LaAA):
	LaAA = 1.53713333333333+0.127381818181818*Locality-Ebang-0.436533333333334*Locality-Mbankomo-0.0388*Locality-Messassi-0.171883333333333*Locality-Nkolbissong
	Interpretation (LaAA):
	Given the R2, 19% of the variability of the dependent variable LaAA is explained by the explanatory variable.
	Given the p-value of the F statistic computed in the ANOVA table, and given the significance level of 5%, the information brought by the explanatory variables is significantly better than what a basic mean would bring.
	Means charts:
	Locality / Duncan / Analysis of the differences between the categories with a confidence interval of 95% (LaAA):
	Contrast	Difference	Standardized difference	Critical value	Pr > Diff	alpha (Modified)	Significant
	Ebang vs Mbankomo	0.563915	6.23351	3.10578	2.73362e-08	0.185494	Yes
	Ebang vs Nkolbissong	0.299265	2.63486	3.03371	0.0446248	0.142625	Yes
	Ebang vs Messassi	0.166182	1.91609	2.93581	0.136831	0.0975	No
	Ebang vs Nkometou	0.127382	1.63556	2.78903	0.103538	0.05	No
	Nkometou vs Mbankomo	0.436533	5.71963	3.03371	2.35573e-07	0.142625	Yes
	Nkometou vs Nkolbissong	0.171883	1.67412	2.93581	0.217731	0.0975	No
	Nkometou vs Messassi	0.0388	0.539978	2.78903	0.589825	0.05	No
	Messassi vs Mbankomo	0.397733	4.66109	2.93581	1.72627e-05	0.0975	Yes
	Messassi vs Nkolbissong	0.133083	1.215	2.78903	0.225828	0.05	No
	Nkolbissong vs Mbankomo	0.26465	2.35214	2.78903	0.0196577	0.05	Yes
	Category	LS means	Standard error	Lower bound (95%)	Upper bound (95%)	Groups
	Ebang	1.66452	0.0649024	1.53652	1.79251	A
	Nkometou	1.53713	0.0430514	1.45223	1.62204	A	B
	Messassi	1.49833	0.0575299	1.38488	1.61179	A	B
	Nkolbissong	1.36525	0.093209	1.18143	1.54907		B
	Mbankomo	1.1006	0.0630208	0.976314	1.22489			C
	Regression of variable LoAP:
	Goodness of fit statistics (LoAP):
	Observations	201
	Sum of weights	201
	DF	196
	R²	0.104811
	Adjusted R²	0.0865417
	MSE	0.178281
	RMSE	0.422233
	MAPE
	DW
	Cp	5
	AIC	-341.666
	SBC	-325.15
	PC	0.940862
	Analysis of variance (LoAP):
	Source	DF	Sum of squares	Mean squares	F	Pr > F
	Model	4	4.09122	1.02281	5.73704	0.000218589
	Error	196	34.9431	0.178281
	Corrected Total	200	39.0343
	Computed against model Y=Mean(Y)
	Model parameters (LoAP):
	Source	Value	Standard error	t	Pr > |t|	Lower bound (95%)	Upper bound (95%)
	Intercept	3.37039	0.0487553	69.1286	1.32216e-139	3.27423	3.46654
	Locality-Ebang	0.0107042	0.0882017	0.121361	0.903529	-0.163242	0.18465
	Locality-Mbankomo	-0.323901	0.0864339	-3.74738	0.000234998	-0.494361	-0.153441
	Locality-Messassi	0.0697324	0.0813749	0.856928	0.392531	-0.0907503	0.230215
	Locality-Nkolbissong	-0.238887	0.116274	-2.05451	0.0412528	-0.468195	-0.00957791
	Locality-Nkometou	0	0
	Equation of the model (LoAP):
	LoAP = 3.37038666666667+1.07042424242426E-02*Locality-Ebang-0.323900952380952*Locality-Mbankomo+6.97323809523814E-02*Locality-Messassi-0.238886666666665*Locality-Nkolbissong
	Interpretation (LoAP):
	Given the R2, 10% of the variability of the dependent variable LoAP is explained by the explanatory variable.
	Given the p-value of the F statistic computed in the ANOVA table, and given the significance level of 5%, the information brought by the explanatory variables is significantly better than what a basic mean would bring.
	Means charts:
	Groupings could not be performed with an exact method because the significance of differences is not transitive in this particular case. The harmonic mean of the group sizes needed to be used.
	Harmonic mean:		31.5423
	Locality / Duncan / Analysis of the differences between the categories with a confidence interval of 95% (LoAP):
	Contrast	Difference	Standardized difference	Critical value	Pr > Diff	alpha (Modified)	Significant
	Messassi vs Mbankomo	0.393633	3.70229	3.10578	0.00254935	0.185494	Yes
	Messassi vs Nkolbissong	0.308619	2.9027	3.03371	0.0213012	0.142625	Yes
	Messassi vs Nkometou	0.0697324	0.655864	2.93581	0.789263	0.0975	No
	Messassi vs Ebang	0.0590281	0.555186	2.78903	0.579401	0.05	No
	Ebang vs Mbankomo	0.334605	3.14711	3.03371	0.0102108	0.142625	Yes
	Ebang vs Nkolbissong	0.249591	2.34751	2.93581	0.051776	0.0975	Yes
	Ebang vs Nkometou	0.0107042	0.100678	2.78903	0.919909	0.05	No
	Nkometou vs Mbankomo	0.323901	3.04643	2.93581	0.00739768	0.0975	Yes
	Nkometou vs Nkolbissong	0.238887	2.24683	2.78903	0.0257657	0.05	Yes
	Nkolbissong vs Mbankomo	0.0850143	0.799597	2.78903	0.424912	0.05	No
	Category	LS means	Standard error	Lower bound (95%)	Upper bound (95%)	Groups
	Messassi	3.44012	0.065152	3.31163	3.56861	A
	Ebang	3.38109	0.0735014	3.23614	3.52605	A
	Nkometou	3.37039	0.0487553	3.27423	3.46654	A
	Nkolbissong	3.1315	0.105558	2.92332	3.33968		B
	Mbankomo	3.04649	0.0713705	2.90573	3.18724		B
	Regression of variable LaAP:
	Goodness of fit statistics (LaAP):
	Observations	201
	Sum of weights	201
	DF	196
	R²	0.121085
	Adjusted R²	0.103148
	MSE	0.0414887
	RMSE	0.203688
	MAPE
	DW
	Cp	5
	AIC	-634.712
	SBC	-618.196
	PC	0.923758
	Analysis of variance (LaAP):
	Source	DF	Sum of squares	Mean squares	F	Pr > F
	Model	4	1.12028	0.280071	6.75054	4.13295e-05
	Error	196	8.13178	0.0414887
	Corrected Total	200	9.25207
	Computed against model Y=Mean(Y)
	Model parameters (LaAP):
	Source	Value	Standard error	t	Pr > |t|	Lower bound (95%)	Upper bound (95%)
	Intercept	0.863267	0.0235198	36.7038	9.14237e-90	0.816882	0.909651
	Locality-Ebang	-0.0174788	0.042549	-0.410792	0.681674	-0.101391	0.0664338
	Locality-Mbankomo	-0.145124	0.0416962	-3.4805	0.000616826	-0.227355	-0.062893
	Locality-Messassi	0.0948786	0.0392557	2.41694	0.0165677	0.0174608	0.172296
	Locality-Nkolbissong	-0.0352042	0.0560912	-0.627623	0.530981	-0.145824	0.0754157
	Locality-Nkometou	0	0
	Equation of the model (LaAP):
	LaAP = 0.863266666666666-1.74787878787877E-02*Locality-Ebang-0.145123809523809*Locality-Mbankomo+9.48785714285718E-02*Locality-Messassi-3.52041666666665E-02*Locality-Nkolbissong
	Interpretation (LaAP):
	Given the R2, 12% of the variability of the dependent variable LaAP is explained by the explanatory variable.
	Given the p-value of the F statistic computed in the ANOVA table, and given the significance level of 5%, the information brought by the explanatory variables is significantly better than what a basic mean would bring.
	Means charts:
	Locality / Duncan / Analysis of the differences between the categories with a confidence interval of 95% (LaAP):
	Contrast	Difference	Standardized difference	Critical value	Pr > Diff	alpha (Modified)	Significant
	Messassi vs Mbankomo	0.240002	5.1483	3.10578	6.28886e-06	0.185494	Yes
	Messassi vs Nkolbissong	0.130083	2.17383	3.03371	0.13419	0.142625	Yes
	Messassi vs Ebang	0.112357	2.37131	2.93581	0.0488182	0.0975	Yes
	Messassi vs Nkometou	0.0948786	2.41694	2.78903	0.0165677	0.05	Yes
	Nkometou vs Mbankomo	0.145124	3.4805	3.03371	0.00342792	0.142625	Yes
	Nkometou vs Nkolbissong	0.0352042	0.627623	2.93581	0.805128	0.0975	No
	Nkometou vs Ebang	0.0174788	0.410792	2.78903	0.681674	0.05	No
	Ebang vs Mbankomo	0.127645	2.58271	2.93581	0.028278	0.0975	Yes
	Ebang vs Nkolbissong	0.0177254	0.28566	2.78903	0.77544	0.05	No
	Nkolbissong vs Mbankomo	0.10992	1.78821	2.78903	0.0752862	0.05	No
	Category	LS means	Standard error	Lower bound (95%)	Upper bound (95%)	Groups
	Messassi	0.958145	0.0314297	0.896161	1.02013	A
	Nkometou	0.863267	0.0235198	0.816882	0.909651		B
	Ebang	0.845788	0.0354575	0.775861	0.915715		B
	Nkolbissong	0.828062	0.0509219	0.727637	0.928488		B	C
	Mbankomo	0.718143	0.0344295	0.650243	0.786043			C
	Regression of variable LoF:
	Goodness of fit statistics (LoF):
	Observations	201
	Sum of weights	201
	DF	196
	R²	0.225472
	Adjusted R²	0.209665
	MSE	0.0391693
	RMSE	0.197912
	MAPE
	DW
	Cp	5
	AIC	-646.275
	SBC	-629.759
	PC	0.814045
	Analysis of variance (LoF):
	Source	DF	Sum of squares	Mean squares	F	Pr > F
	Model	4	2.2349	0.558725	14.2643	3.08442e-10
	Error	196	7.67719	0.0391693
	Corrected Total	200	9.91209
	Computed against model Y=Mean(Y)
	Model parameters (LoF):
	Source	Value	Standard error	t	Pr > |t|	Lower bound (95%)	Upper bound (95%)
	Intercept	1.39236	0.022853	60.9269	2.48257e-129	1.34729	1.43743
	Locality-Ebang	0.0680036	0.0413426	1.64488	0.101597	-0.0135297	0.149537
	Locality-Mbankomo	0.266411	0.040514	6.57579	4.29032e-10	0.186512	0.346311
	Locality-Messassi	-0.0110267	0.0381426	-0.28909	0.772818	-0.0862493	0.064196
	Locality-Nkolbissong	0.192827	0.0545008	3.53807	0.00050323	0.0853442	0.300311
	Locality-Nkometou	0	0
	Equation of the model (LoF):
	LoF = 1.39236+6.80036363636352E-02*Locality-Ebang+0.266411428571426*Locality-Mbankomo-1.10266666666703E-02*Locality-Messassi+0.192827499999997*Locality-Nkolbissong
	Interpretation (LoF):
	Given the R2, 23% of the variability of the dependent variable LoF is explained by the explanatory variable.
	Given the p-value of the F statistic computed in the ANOVA table, and given the significance level of 5%, the information brought by the explanatory variables is significantly better than what a basic mean would bring.
	Means charts:
	Locality / Duncan / Analysis of the differences between the categories with a confidence interval of 95% (LoF):
	Contrast	Difference	Standardized difference	Critical value	Pr > Diff	alpha (Modified)	Significant
	Mbankomo vs Messassi	0.277438	6.125	3.10578	4.85585e-08	0.185494	Yes
	Mbankomo vs Nkometou	0.266411	6.57579	3.03371	2.57125e-09	0.142625	Yes
	Mbankomo vs Ebang	0.198408	4.13164	2.93581	0.000157202	0.0975	Yes
	Mbankomo vs Nkolbissong	0.0735839	1.23202	2.78903	0.219416	0.05	No
	Nkolbissong vs Messassi	0.203854	3.50604	3.03371	0.00314018	0.142625	Yes
	Nkolbissong vs Nkometou	0.192827	3.53807	2.93581	0.00145497	0.0975	Yes
	Nkolbissong vs Ebang	0.124824	2.07035	2.78903	0.0397303	0.05	Yes
	Ebang vs Messassi	0.0790303	1.71661	2.93581	0.201536	0.0975	No
	Ebang vs Nkometou	0.0680036	1.64488	2.78903	0.101597	0.05	No
	Nkometou vs Messassi	0.0110267	0.28909	2.78903	0.772818	0.05	No
	Category	LS means	Standard error	Lower bound (95%)	Upper bound (95%)	Groups
	Mbankomo	1.65877	0.0334533	1.5928	1.72475	A
	Nkolbissong	1.58519	0.0494781	1.48761	1.68277	A
	Ebang	1.46036	0.0344521	1.39242	1.52831		B
	Nkometou	1.39236	0.022853	1.34729	1.43743		B
	Messassi	1.38133	0.0305385	1.32111	1.44156		B
	Regression of variable LoTi:
	Goodness of fit statistics (LoTi):
	Observations	201
	Sum of weights	201
	DF	196
	R²	0.0571502
	Adjusted R²	0.0379083
	MSE	0.0549241
	RMSE	0.234359
	MAPE
	DW
	Cp	5
	AIC	-578.326
	SBC	-561.809
	PC	0.990954
	Analysis of variance (LoTi):
	Source	DF	Sum of squares	Mean squares	F	Pr > F
	Model	4	0.65252	0.16313	2.9701	0.0206519
	Error	196	10.7651	0.0549241
	Corrected Total	200	11.4176
	Computed against model Y=Mean(Y)
	Model parameters (LoTi):
	Source	Value	Standard error	t	Pr > |t|	Lower bound (95%)	Upper bound (95%)
	Intercept	1.80311	0.0270614	66.6301	1.34115e-136	1.74974	1.85648
	Locality-Ebang	0.0711358	0.048956	1.45306	0.147807	-0.0254123	0.167684
	Locality-Mbankomo	-0.111821	0.0479748	-2.33083	0.0207793	-0.206434	-0.0172079
	Locality-Messassi	-0.0539162	0.0451668	-1.19371	0.234033	-0.142991	0.035159
	Locality-Nkolbissong	-0.0393567	0.0645374	-0.609827	0.542683	-0.166634	0.0879202
	Locality-Nkometou	0	0
	Equation of the model (LoTi):
	LoTi = 1.80310666666667+7.11357575757581E-02*Locality-Ebang-0.111820952380952*Locality-Mbankomo-5.39161904761898E-02*Locality-Messassi-3.93566666666659E-02*Locality-Nkolbissong
	Interpretation (LoTi):
	Given the R2, 6% of the variability of the dependent variable LoTi is explained by the explanatory variable.
	Given the p-value of the F statistic computed in the ANOVA table, and given the significance level of 5%, the information brought by the explanatory variables is significantly better than what a basic mean would bring.
	Means charts:
	Locality / Duncan / Analysis of the differences between the categories with a confidence interval of 95% (LoTi):
	Contrast	Difference	Standardized difference	Critical value	Pr > Diff	alpha (Modified)	Significant
	Ebang vs Mbankomo	0.182957	3.21739	3.10578	0.0130034	0.185494	Yes
	Ebang vs Messassi	0.125052	2.29382	3.03371	0.102965	0.142625	Yes
	Ebang vs Nkolbissong	0.110492	1.54764	2.93581	0.271079	0.0975	No
	Ebang vs Nkometou	0.0711358	1.45306	2.78903	0.147807	0.05	No
	Nkometou vs Mbankomo	0.111821	2.33083	3.03371	0.0945929	0.142625	Yes
	Nkometou vs Messassi	0.0539162	1.19371	2.93581	0.458325	0.0975	No
	Nkometou vs Nkolbissong	0.0393567	0.609827	2.78903	0.542683	0.05	No
	Nkolbissong vs Mbankomo	0.0724643	1.02459	2.93581	0.562247	0.0975	No
	Nkolbissong vs Messassi	0.0145595	0.211464	2.78903	0.832745	0.05	No
	Messassi vs Mbankomo	0.0579048	1.07956	2.78903	0.281665	0.05	No
	Category	LS means	Standard error	Lower bound (95%)	Upper bound (95%)	Groups
	Ebang	1.87424	0.0407966	1.79379	1.9547	A
	Nkometou	1.80311	0.0270614	1.74974	1.85648	A	B
	Nkolbissong	1.76375	0.0585897	1.6482	1.8793	A	B	C
	Messassi	1.74919	0.0361624	1.67787	1.82051		B	C
	Mbankomo	1.69129	0.0396139	1.61316	1.76941			C
	Regression of variable LaTi:
	Goodness of fit statistics (LaTi):
	Observations	201
	Sum of weights	201
	DF	196
	R²	0.111511
	Adjusted R²	0.0933789
	MSE	0.009361
	RMSE	0.0967523
	MAPE
	DW
	Cp	5
	AIC	-933.975
	SBC	-917.459
	PC	0.93382
	Analysis of variance (LaTi):
	Source	DF	Sum of squares	Mean squares	F	Pr > F
	Model	4	0.230274	0.0575685	6.14983	0.000110779
	Error	196	1.83476	0.009361
	Corrected Total	200	2.06503
	Computed against model Y=Mean(Y)
	Model parameters (LaTi):
	Source	Value	Standard error	t	Pr > |t|	Lower bound (95%)	Upper bound (95%)
	Intercept	0.62572	0.011172	56.0079	1.48915e-122	0.603687	0.647753
	Locality-Ebang	0.0693103	0.0202109	3.42935	0.000737533	0.0294516	0.109169
	Locality-Mbankomo	0.0291943	0.0198058	1.47403	0.142079	-0.00986559	0.0682542
	Locality-Messassi	-0.0293629	0.0186466	-1.57471	0.116937	-0.0661365	0.0074108
	Locality-Nkolbissong	0.0555925	0.0266435	2.08653	0.0382242	0.00304777	0.108137
	Locality-Nkometou	0	0
	Equation of the model (LaTi):
	LaTi = 0.62572+0.069310303030303*Locality-Ebang+2.91942857142862E-02*Locality-Mbankomo-2.93628571428566E-02*Locality-Messassi+5.55925000000005E-02*Locality-Nkolbissong
	Interpretation (LaTi):
	Given the R2, 11% of the variability of the dependent variable LaTi is explained by the explanatory variable.
	Given the p-value of the F statistic computed in the ANOVA table, and given the significance level of 5%, the information brought by the explanatory variables is significantly better than what a basic mean would bring.
	Means charts:
	Locality / Duncan / Analysis of the differences between the categories with a confidence interval of 95% (LaTi):
	Contrast	Difference	Standardized difference	Critical value	Pr > Diff	alpha (Modified)	Significant
	Ebang vs Messassi	0.0986732	4.38419	3.10578	0.000183031	0.185494	Yes
	Ebang vs Nkometou	0.0693103	3.42935	3.03371	0.00407893	0.142625	Yes
	Ebang vs Mbankomo	0.040116	1.70881	2.93581	0.204445	0.0975	No
	Ebang vs Nkolbissong	0.0137178	0.465417	2.78903	0.642149	0.05	No
	Nkolbissong vs Messassi	0.0849554	2.98882	3.03371	0.0165453	0.142625	Yes
	Nkolbissong vs Nkometou	0.0555925	2.08653	2.93581	0.0952488	0.0975	Yes
	Nkolbissong vs Mbankomo	0.0263982	0.904112	2.78903	0.367046	0.05	No
	Mbankomo vs Messassi	0.0585571	2.64443	2.93581	0.0239229	0.0975	Yes
	Mbankomo vs Nkometou	0.0291943	1.47403	2.78903	0.142079	0.05	No
	Nkometou vs Messassi	0.0293629	1.57471	2.78903	0.116937	0.05	No
	Category	LS means	Standard error	Lower bound (95%)	Upper bound (95%)	Groups
	Ebang	0.69503	0.0168424	0.661815	0.728246	A
	Nkolbissong	0.681312	0.0241881	0.63361	0.729015	A
	Mbankomo	0.654914	0.0163541	0.622662	0.687167	A	B
	Nkometou	0.62572	0.011172	0.603687	0.647753		B	C
	Messassi	0.596357	0.0149292	0.566915	0.6258			C
	Regression of variable LoM:
	Goodness of fit statistics (LoM):
	Observations	201
	Sum of weights	201
	DF	196
	R²	0.0873165
	Adjusted R²	0.0686904
	MSE	0.859355
	RMSE	0.927014
	MAPE
	DW
	Cp	5
	AIC	-25.5294
	SBC	-9.01289
	PC	0.959249
	Analysis of variance (LoM):
	Source	DF	Sum of squares	Mean squares	F	Pr > F
	Model	4	16.1141	4.02852	4.68784	0.00123509
	Error	196	168.434	0.859355
	Corrected Total	200	184.548
	Computed against model Y=Mean(Y)
	Model parameters (LoM):
	Source	Value	Standard error	t	Pr > |t|	Lower bound (95%)	Upper bound (95%)
	Intercept	0.582467	0.107042	5.44146	1.5661e-07	0.371364	0.793569
	Locality-Ebang	0.753897	0.193647	3.89315	0.000135608	0.371998	1.1358
	Locality-Mbankomo	-0.0350667	0.189766	-0.184789	0.853585	-0.409312	0.339178
	Locality-Messassi	-0.0126333	0.178659	-0.0707121	0.943699	-0.364973	0.339707
	Locality-Nkolbissong	0.00903333	0.25528	0.035386	0.971808	-0.494414	0.512481
	Locality-Nkometou	0	0
	Equation of the model (LoM):
	LoM = 0.582466666666667+0.753896969696969*Locality-Ebang-0.035066666666667*Locality-Mbankomo-1.26333333333333E-02*Locality-Messassi+9.03333333333329E-03*Locality-Nkolbissong
	Interpretation (LoM):
	Given the R2, 9% of the variability of the dependent variable LoM is explained by the explanatory variable.
	Given the p-value of the F statistic computed in the ANOVA table, and given the significance level of 5%, the information brought by the explanatory variables is significantly better than what a basic mean would bring.
	Means charts:
	Locality / Duncan / Analysis of the differences between the categories with a confidence interval of 95% (LoM):
	Contrast	Difference	Standardized difference	Critical value	Pr > Diff	alpha (Modified)	Significant
	Ebang vs Mbankomo	0.788964	3.50758	3.10578	0.00503264	0.185494	Yes
	Ebang vs Messassi	0.76653	3.55463	3.03371	0.00265366	0.142625	Yes
	Ebang vs Nkometou	0.753897	3.89315	2.93581	0.000397293	0.0975	Yes
	Ebang vs Nkolbissong	0.744864	2.6376	2.78903	0.00901951	0.05	Yes
	Nkolbissong vs Mbankomo	0.0441	0.157638	3.03371	0.998601	0.142625	No
	Nkolbissong vs Messassi	0.0216667	0.0795566	2.93581	0.996517	0.0975	No
	Nkolbissong vs Nkometou	0.00903333	0.035386	2.78903	0.971808	0.05	No
	Nkometou vs Mbankomo	0.0350667	0.184789	2.93581	0.981353	0.0975	No
	Nkometou vs Messassi	0.0126333	0.0707121	2.78903	0.943699	0.05	No
	Messassi vs Mbankomo	0.0224333	0.105735	2.78903	0.9159	0.05	No
	Category	LS means	Standard error	Lower bound (95%)	Upper bound (95%)	Groups
	Ebang	1.33636	0.161372	1.01811	1.65461	A
	Nkolbissong	0.5915	0.231754	0.134449	1.04855		B
	Nkometou	0.582467	0.107042	0.371364	0.793569		B
	Messassi	0.569833	0.143041	0.287736	0.851931		B
	Mbankomo	0.5474	0.156694	0.238377	0.856423		B
	Regression of variable LaM:
	Goodness of fit statistics (LaM):
	Observations	201
	Sum of weights	201
	DF	196
	R²	0.176587
	Adjusted R²	0.159782
	MSE	0.00645023
	RMSE	0.0803133
	MAPE
	DW
	Cp	5
	AIC	-1008.83
	SBC	-992.318
	PC	0.865424
	Analysis of variance (LaM):
	Source	DF	Sum of squares	Mean squares	F	Pr > F
	Model	4	0.271126	0.0677815	10.5084	9.84315e-08
	Error	196	1.26424	0.00645023
	Corrected Total	200	1.53537
	Computed against model Y=Mean(Y)
	Model parameters (LaM):
	Source	Value	Standard error	t	Pr > |t|	Lower bound (95%)	Upper bound (95%)
	Intercept	0.311547	0.00927378	33.5944	2.93136e-83	0.293257	0.329836
	Locality-Ebang	0.060423	0.0167769	3.60156	0.000400848	0.0273366	0.0935094
	Locality-Mbankomo	0.0761962	0.0164407	4.63462	6.5146e-06	0.0437729	0.108619
	Locality-Messassi	-0.011999	0.0154784	-0.775214	0.439147	-0.0425246	0.0185265
	Locality-Nkolbissong	0.0710783	0.0221166	3.21381	0.00153171	0.0274614	0.114695
	Locality-Nkometou	0	0
	Equation of the model (LaM):
	LaM = 0.311546666666667+6.04230303030303E-02*Locality-Ebang+7.61961904761903E-02*Locality-Mbankomo-1.19990476190478E-02*Locality-Messassi+7.10783333333332E-02*Locality-Nkolbissong
	Interpretation (LaM):
	Given the R2, 18% of the variability of the dependent variable LaM is explained by the explanatory variable.
	Given the p-value of the F statistic computed in the ANOVA table, and given the significance level of 5%, the information brought by the explanatory variables is significantly better than what a basic mean would bring.
	Means charts:
	Locality / Duncan / Analysis of the differences between the categories with a confidence interval of 95% (LaM):
	Contrast	Difference	Standardized difference	Critical value	Pr > Diff	alpha (Modified)	Significant
	Mbankomo vs Messassi	0.0881952	4.79812	3.10578	3.10273e-05	0.185494	Yes
	Mbankomo vs Nkometou	0.0761962	4.63462	3.03371	3.84095e-05	0.142625	Yes
	Mbankomo vs Ebang	0.0157732	0.809409	2.93581	0.69765	0.0975	No
	Mbankomo vs Nkolbissong	0.00511786	0.211159	2.78903	0.832983	0.05	No
	Nkolbissong vs Messassi	0.0830774	3.521	3.03371	0.00298224	0.142625	Yes
	Nkolbissong vs Nkometou	0.0710783	3.21381	2.93581	0.00435154	0.0975	Yes
	Nkolbissong vs Ebang	0.0106553	0.435509	2.78903	0.663672	0.05	No
	Ebang vs Messassi	0.0724221	3.87645	2.93581	0.000423248	0.0975	Yes
	Ebang vs Nkometou	0.060423	3.60156	2.78903	0.000400848	0.05	Yes
	Nkometou vs Messassi	0.011999	0.775214	2.78903	0.439147	0.05	No
	Category	LS means	Standard error	Lower bound (95%)	Upper bound (95%)	Groups
	Mbankomo	0.387743	0.0135754	0.36097	0.414516	A
	Nkolbissong	0.382625	0.0200783	0.343028	0.422222	A
	Ebang	0.37197	0.0139808	0.344398	0.399542	A
	Nkometou	0.311547	0.00927378	0.293257	0.329836		B
	Messassi	0.299548	0.0123926	0.275108	0.323988		B
	Regression of variable DoD:
	Goodness of fit statistics (DoD):
	Observations	201
	Sum of weights	201
	DF	196
	R²	0.0609527
	Adjusted R²	0.0417885
	MSE	0.0094791
	RMSE	0.0973607
	MAPE
	DW
	Cp	5
	AIC	-931.455
	SBC	-914.939
	PC	0.986958
	Analysis of variance (DoD):
	Source	DF	Sum of squares	Mean squares	F	Pr > F
	Model	4	0.120595	0.0301487	3.18055	0.0146829
	Error	196	1.8579	0.0094791
	Corrected Total	200	1.9785
	Computed against model Y=Mean(Y)
	Model parameters (DoD):
	Source	Value	Standard error	t	Pr > |t|	Lower bound (95%)	Upper bound (95%)
	Intercept	0.43784	0.0112422	38.946	3.30747e-94	0.415669	0.460011
	Locality-Ebang	-0.0612945	0.020338	-3.0138	0.00292085	-0.101404	-0.0211852
	Locality-Mbankomo	-0.0523257	0.0199304	-2.62543	0.0093369	-0.0916312	-0.0130202
	Locality-Messassi	-0.0374114	0.0187638	-1.99381	0.0475596	-0.0744163	-0.000406529
	Locality-Nkolbissong	-0.0206525	0.026811	-0.770298	0.44205	-0.0735277	0.0322227
	Locality-Nkometou	0	0
	Equation of the model (DoD):
	DoD = 0.43784-6.12945454545455E-02*Locality-Ebang-5.23257142857144E-02*Locality-Mbankomo-3.74114285714286E-02*Locality-Messassi-2.06525000000002E-02*Locality-Nkolbissong
	Interpretation (DoD):
	Given the R2, 6% of the variability of the dependent variable DoD is explained by the explanatory variable.
	Given the p-value of the F statistic computed in the ANOVA table, and given the significance level of 5%, the information brought by the explanatory variables is significantly better than what a basic mean would bring.
	Means charts:
	Locality / Duncan / Analysis of the differences between the categories with a confidence interval of 95% (DoD):
	Contrast	Difference	Standardized difference	Critical value	Pr > Diff	alpha (Modified)	Significant
	Nkometou vs Ebang	0.0612945	3.0138	3.10578	0.0241182	0.185494	Yes
	Nkometou vs Mbankomo	0.0523257	2.62543	3.03371	0.0457424	0.142625	Yes
	Nkometou vs Messassi	0.0374114	1.99381	2.93581	0.116411	0.0975	No
	Nkometou vs Nkolbissong	0.0206525	0.770298	2.78903	0.44205	0.05	No
	Nkolbissong vs Ebang	0.040642	1.37029	3.03371	0.5195	0.142625	No
	Nkolbissong vs Mbankomo	0.0316732	1.078	2.93581	0.528847	0.0975	No
	Nkolbissong vs Messassi	0.0167589	0.585913	2.78903	0.558608	0.05	No
	Messassi vs Ebang	0.0238831	1.05453	2.93581	0.543477	0.0975	No
	Messassi vs Mbankomo	0.0149143	0.669318	2.78903	0.504081	0.05	No
	Mbankomo vs Ebang	0.00896883	0.379655	2.78903	0.704613	0.05	No
	Category	LS means	Standard error	Lower bound (95%)	Upper bound (95%)	Groups
	Nkometou	0.43784	0.0112422	0.415669	0.460011	A
	Nkolbissong	0.417187	0.0243402	0.369185	0.46519	A	B
	Messassi	0.400429	0.0150231	0.370801	0.430056	A	B
	Mbankomo	0.385514	0.016457	0.353059	0.41797		B
	Ebang	0.376545	0.0169483	0.343121	0.40997		B
	Regression of variable DooD:
	Goodness of fit statistics (DooD):
	Observations	201
	Sum of weights	201
	DF	196
	R²	0.027675
	Adjusted R²	0.00783167
	MSE	0.00575464
	RMSE	0.0758594
	MAPE
	DW
	Cp	5
	AIC	-1031.77
	SBC	-1015.25
	PC	1.02193
	Analysis of variance (DooD):
	Source	DF	Sum of squares	Mean squares	F	Pr > F
	Model	4	0.0321034	0.00802585	1.39467	0.237217
	Error	196	1.12791	0.00575464
	Corrected Total	200	1.16001
	Computed against model Y=Mean(Y)
	Model parameters (DooD):
	Source	Value	Standard error	t	Pr > |t|	Lower bound (95%)	Upper bound (95%)
	Intercept	0.396507	0.00875948	45.266	9.92208e-106	0.379232	0.413782
	Locality-Ebang	-0.0317188	0.0158465	-2.00163	0.0467039	-0.0629703	-0.000467246
	Locality-Mbankomo	-0.0174095	0.0155289	-1.1211	0.263615	-0.0480347	0.0132157
	Locality-Messassi	-0.0182686	0.01462	-1.24956	0.21295	-0.0471012	0.0105641
	Locality-Nkolbissong	-0.0333192	0.02089	-1.59498	0.112328	-0.0745173	0.00787894
	Locality-Nkometou	0	0
	Equation of the model (DooD):
	DooD = 0.396506666666667-3.17187878787879E-02*Locality-Ebang-0.017409523809524*Locality-Mbankomo-1.82685714285716E-02*Locality-Messassi-3.33191666666668E-02*Locality-Nkolbissong
	Interpretation (DooD):
	Given the R2, 3% of the variability of the dependent variable DooD is explained by the explanatory variable.
	Given the p-value of the F statistic computed in the ANOVA table, and given the significance level of 5%, the information brought by the explanatory variables is not significantly better than what a basic mean would bring. The fact that variables do not bring significant information to the model may be interpreted in different ways: Either the variables do not contribute to the model, or some cov…
	Means charts:
	Locality / Duncan / Analysis of the differences between the categories with a confidence interval of 95% (DooD):
	Contrast	Difference	Standardized difference	Critical value	Pr > Diff	alpha (Modified)	Significant
	Nkometou vs Nkolbissong	0.0333192	1.59498	3.10578	0.502392	0.185494	No
	Nkometou vs Ebang	0.0317188	2.00163	3.03371	0.190898	0.142625	No
	Nkometou vs Messassi	0.0182686	1.24956	2.93581	0.425571	0.0975	No
	Nkometou vs Mbankomo	0.0174095	1.1211	2.78903	0.263615	0.05	No
	Mbankomo vs Nkolbissong	0.0159096	0.694961	3.03371	0.898925	0.142625	No
	Mbankomo vs Ebang	0.0143093	0.7774	2.93581	0.717339	0.0975	No
	Mbankomo vs Messassi	0.000859048	0.0494791	2.78903	0.960588	0.05	No
	Messassi vs Nkolbissong	0.0150506	0.675329	2.93581	0.778116	0.0975	No
	Messassi vs Ebang	0.0134502	0.762204	2.78903	0.446855	0.05	No
	Ebang vs Nkolbissong	0.00160038	0.069252	2.78903	0.94486	0.05	No
	Category	LS means	Standard error	Lower bound (95%)	Upper bound (95%)	Groups
	Nkometou	0.396507	0.00875948	0.379232	0.413782	A
	Mbankomo	0.379097	0.0128226	0.353809	0.404385	A
	Messassi	0.378238	0.0117054	0.355153	0.401323	A
	Ebang	0.364788	0.0132054	0.338745	0.390831	A
	Nkolbissong	0.363187	0.0189648	0.325786	0.400589	A
	Regression of variable La1T:
	Goodness of fit statistics (La1T):
	Observations	201
	Sum of weights	201
	DF	196
	R²	0.0614436
	Adjusted R²	0.0422894
	MSE	0.0419713
	RMSE	0.204869
	MAPE
	DW
	Cp	5
	AIC	-632.388
	SBC	-615.871
	PC	0.986442
	Analysis of variance (La1T):
	Source	DF	Sum of squares	Mean squares	F	Pr > F
	Model	4	0.538549	0.134637	3.20784	0.0140457
	Error	196	8.22637	0.0419713
	Corrected Total	200	8.76492
	Computed against model Y=Mean(Y)
	Model parameters (La1T):
	Source	Value	Standard error	t	Pr > |t|	Lower bound (95%)	Upper bound (95%)
	Intercept	0.99652	0.0236562	42.1251	3.54745e-100	0.949867	1.04317
	Locality-Ebang	-0.0641564	0.0427957	-1.49913	0.135449	-0.148556	0.0202428
	Locality-Mbankomo	-0.128977	0.041938	-3.07542	0.00240215	-0.211685	-0.0462695
	Locality-Messassi	0.00940857	0.0394833	0.238292	0.811903	-0.0684581	0.0872753
	Locality-Nkolbissong	-0.07652	0.0564165	-1.35634	0.176551	-0.187781	0.0347413
	Locality-Nkometou	0	0
	Equation of the model (La1T):
	La1T = 0.996520000000001-6.41563636363639E-02*Locality-Ebang-0.128977142857143*Locality-Mbankomo+9.4085714285711E-03*Locality-Messassi-7.65200000000007E-02*Locality-Nkolbissong
	Interpretation (La1T):
	Given the R2, 6% of the variability of the dependent variable La1T is explained by the explanatory variable.
	Given the p-value of the F statistic computed in the ANOVA table, and given the significance level of 5%, the information brought by the explanatory variables is significantly better than what a basic mean would bring.
	Means charts:
	Locality / Duncan / Analysis of the differences between the categories with a confidence interval of 95% (La1T):
	Contrast	Difference	Standardized difference	Critical value	Pr > Diff	alpha (Modified)	Significant
	Messassi vs Mbankomo	0.138386	2.9514	3.10578	0.0289045	0.185494	Yes
	Messassi vs Nkolbissong	0.0859286	1.42768	3.03371	0.483624	0.142625	No
	Messassi vs Ebang	0.0735649	1.54364	2.93581	0.272892	0.0975	No
	Messassi vs Nkometou	0.00940857	0.238292	2.78903	0.811903	0.05	No
	Nkometou vs Mbankomo	0.128977	3.07542	3.03371	0.0127425	0.142625	Yes
	Nkometou vs Nkolbissong	0.07652	1.35634	2.93581	0.365959	0.0975	No
	Nkometou vs Ebang	0.0641564	1.49913	2.78903	0.135449	0.05	No
	Ebang vs Mbankomo	0.0648208	1.30399	2.93581	0.394651	0.0975	No
	Ebang vs Nkolbissong	0.0123636	0.198102	2.78903	0.843171	0.05	No
	Nkolbissong vs Mbankomo	0.0524571	0.848472	2.78903	0.39721	0.05	No
	Category	LS means	Standard error	Lower bound (95%)	Upper bound (95%)	Groups
	Messassi	1.00593	0.031612	0.943585	1.06827	A
	Nkometou	0.99652	0.0236562	0.949867	1.04317	A
	Ebang	0.932364	0.0356631	0.862031	1.0027	A	B
	Nkolbissong	0.92	0.0512172	0.818992	1.02101	A	B
	Mbankomo	0.867543	0.0346292	0.799249	0.935836		B
	Regression of variable La2T:
	Goodness of fit statistics (La2T):
	Observations	201
	Sum of weights	201
	DF	196
	R²	0.0621689
	Adjusted R²	0.0430295
	MSE	0.0264
	RMSE	0.162481
	MAPE
	DW
	Cp	5
	AIC	-725.576
	SBC	-709.059
	PC	0.98568
	Analysis of variance (La2T):
	Source	DF	Sum of squares	Mean squares	F	Pr > F
	Model	4	0.343011	0.0857529	3.24821	0.0131528
	Error	196	5.1744	0.0264
	Corrected Total	200	5.51742
	Computed against model Y=Mean(Y)
	Model parameters (La2T):
	Source	Value	Standard error	t	Pr > |t|	Lower bound (95%)	Upper bound (95%)
	Intercept	0.927787	0.0187617	49.4512	1.18267e-112	0.890786	0.964787
	Locality-Ebang	-0.0249079	0.0339411	-0.733855	0.463914	-0.0918446	0.0420288
	Locality-Mbankomo	-0.0957295	0.0332609	-2.87814	0.00444408	-0.161325	-0.0301344
	Locality-Messassi	-0.0244057	0.0313141	-0.779384	0.436693	-0.0861615	0.0373501
	Locality-Nkolbissong	-0.119412	0.0447437	-2.66879	0.00825032	-0.207653	-0.0311707
	Locality-Nkometou	0	0
	Equation of the model (La2T):
	La2T = 0.927786666666667-2.49078787878787E-02*Locality-Ebang-9.57295238095239E-02*Locality-Mbankomo-2.44057142857141E-02*Locality-Messassi-0.119411666666667*Locality-Nkolbissong
	Interpretation (La2T):
	Given the R2, 6% of the variability of the dependent variable La2T is explained by the explanatory variable.
	Given the p-value of the F statistic computed in the ANOVA table, and given the significance level of 5%, the information brought by the explanatory variables is significantly better than what a basic mean would bring.
	Means charts:
	Locality / Duncan / Analysis of the differences between the categories with a confidence interval of 95% (La2T):
	Contrast	Difference	Standardized difference	Critical value	Pr > Diff	alpha (Modified)	Significant
	Nkometou vs Nkolbissong	0.119412	2.66879	3.10578	0.0623836	0.185494	Yes
	Nkometou vs Mbankomo	0.0957295	2.87814	3.03371	0.0228625	0.142625	Yes
	Nkometou vs Ebang	0.0249079	0.733855	2.93581	0.743692	0.0975	No
	Nkometou vs Messassi	0.0244057	0.779384	2.78903	0.436693	0.05	No
	Messassi vs Nkolbissong	0.095006	1.9903	3.03371	0.195148	0.142625	No
	Messassi vs Mbankomo	0.0713238	1.91799	2.93581	0.136302	0.0975	No
	Messassi vs Ebang	0.000502165	0.013286	2.78903	0.989413	0.05	No
	Ebang vs Nkolbissong	0.0945038	1.90926	2.93581	0.138748	0.0975	No
	Ebang vs Mbankomo	0.0708216	1.79639	2.78903	0.0739726	0.05	No
	Mbankomo vs Nkolbissong	0.0236821	0.482979	2.78903	0.62965	0.05	No
	Category	LS means	Standard error	Lower bound (95%)	Upper bound (95%)	Groups
	Nkometou	0.927787	0.0187617	0.890786	0.964787	A
	Messassi	0.903381	0.0250713	0.853937	0.952825	A	B
	Ebang	0.902879	0.0282843	0.847098	0.958659	A	B
	Mbankomo	0.832057	0.0274643	0.777894	0.886221		B
	Nkolbissong	0.808375	0.0406202	0.728266	0.888484		B
	Regression of variable La3T:
	Goodness of fit statistics (La3T):
	Observations	201
	Sum of weights	201
	DF	196
	R²	0.0788417
	Adjusted R²	0.0600425
	MSE	0.0242683
	RMSE	0.155783
	MAPE
	DW
	Cp	5
	AIC	-742.499
	SBC	-725.983
	PC	0.968156
	Analysis of variance (La3T):
	Source	DF	Sum of squares	Mean squares	F	Pr > F
	Model	4	0.407114	0.101779	4.1939	0.00278997
	Error	196	4.75658	0.0242683
	Corrected Total	200	5.16369
	Computed against model Y=Mean(Y)
	Model parameters (La3T):
	Source	Value	Standard error	t	Pr > |t|	Lower bound (95%)	Upper bound (95%)
	Intercept	0.702893	0.0179882	39.0752	1.86035e-94	0.667418	0.738369
	Locality-Ebang	0.0389855	0.0325419	1.19801	0.232361	-0.0251919	0.103163
	Locality-Mbankomo	-0.0555505	0.0318897	-1.74195	0.0830851	-0.118442	0.00734059
	Locality-Messassi	0.03944	0.0300232	1.31365	0.190499	-0.01977	0.09865
	Locality-Nkolbissong	-0.107893	0.0428992	-2.51504	0.0127053	-0.192497	-0.02329
	Locality-Nkometou	0	0
	Equation of the model (La3T):
	La3T = 0.702893333333334+3.89854545454542E-02*Locality-Ebang-5.55504761904767E-02*Locality-Mbankomo+3.94399999999993E-02*Locality-Messassi-0.107893333333334*Locality-Nkolbissong
	Interpretation (La3T):
	Given the R2, 8% of the variability of the dependent variable La3T is explained by the explanatory variable.
	Given the p-value of the F statistic computed in the ANOVA table, and given the significance level of 5%, the information brought by the explanatory variables is significantly better than what a basic mean would bring.
	Means charts:
	Locality / Duncan / Analysis of the differences between the categories with a confidence interval of 95% (La3T):
	Contrast	Difference	Standardized difference	Critical value	Pr > Diff	alpha (Modified)	Significant
	Messassi vs Nkolbissong	0.147333	3.21923	3.10578	0.0129284	0.185494	Yes
	Messassi vs Mbankomo	0.0949905	2.66424	3.03371	0.0412906	0.142625	Yes
	Messassi vs Nkometou	0.03944	1.31365	2.93581	0.389277	0.0975	No
	Messassi vs Ebang	0.000454545	0.0125432	2.78903	0.990005	0.05	No
	Ebang vs Nkolbissong	0.146879	3.09499	3.03371	0.0120008	0.142625	Yes
	Ebang vs Mbankomo	0.0945359	2.501	2.93581	0.0350956	0.0975	Yes
	Ebang vs Nkometou	0.0389855	1.19801	2.78903	0.232361	0.05	No
	Nkometou vs Nkolbissong	0.107893	2.51504	2.93581	0.0338319	0.0975	Yes
	Nkometou vs Mbankomo	0.0555505	1.74195	2.78903	0.0830851	0.05	No
	Mbankomo vs Nkolbissong	0.0523429	1.11339	2.78903	0.266905	0.05	No
	Category	LS means	Standard error	Lower bound (95%)	Upper bound (95%)	Groups
	Messassi	0.742333	0.0240378	0.694927	0.789739	A
	Ebang	0.741879	0.0271183	0.688398	0.79536	A
	Nkometou	0.702893	0.0179882	0.667418	0.738369	A	B
	Mbankomo	0.647343	0.0263321	0.595412	0.699273		B	C
	Nkolbissong	0.595	0.0389457	0.518194	0.671806			C
	Regression of variable La4T:
	Goodness of fit statistics (La4T):
	Observations	201
	Sum of weights	201
	DF	196
	R²	0.0723568
	Adjusted R²	0.0534253
	MSE	0.0305516
	RMSE	0.17479
	MAPE
	DW
	Cp	5
	AIC	-696.22
	SBC	-679.703
	PC	0.974972
	Analysis of variance (La4T):
	Source	DF	Sum of squares	Mean squares	F	Pr > F
	Model	4	0.467076	0.116769	3.82203	0.00514441
	Error	196	5.9881	0.0305516
	Corrected Total	200	6.45518
	Computed against model Y=Mean(Y)
	Model parameters (La4T):
	Source	Value	Standard error	t	Pr > |t|	Lower bound (95%)	Upper bound (95%)
	Intercept	0.49628	0.020183	24.589	8.33493e-62	0.456476	0.536084
	Locality-Ebang	0.116296	0.0365124	3.1851	0.00168367	0.0442881	0.188303
	Locality-Mbankomo	0.0420914	0.0357807	1.17637	0.240872	-0.0284731	0.112656
	Locality-Messassi	0.0989343	0.0336864	2.93692	0.00371181	0.0325	0.165369
	Locality-Nkolbissong	0.0045325	0.0481334	0.0941653	0.925074	-0.0903934	0.0994584
	Locality-Nkometou	0	0
	Equation of the model (La4T):
	La4T = 0.49628+0.116295757575757*Locality-Ebang+4.20914285714286E-02*Locality-Mbankomo+9.89342857142859E-02*Locality-Messassi+4.53250000000002E-03*Locality-Nkolbissong
	Interpretation (La4T):
	Given the R2, 7% of the variability of the dependent variable La4T is explained by the explanatory variable.
	Given the p-value of the F statistic computed in the ANOVA table, and given the significance level of 5%, the information brought by the explanatory variables is significantly better than what a basic mean would bring.
	Means charts:
	Locality / Duncan / Analysis of the differences between the categories with a confidence interval of 95% (La4T):
	Contrast	Difference	Standardized difference	Critical value	Pr > Diff	alpha (Modified)	Significant
	Ebang vs Nkometou	0.116296	3.1851	3.10578	0.0143809	0.185494	Yes
	Ebang vs Nkolbissong	0.111763	2.09895	3.03371	0.157052	0.142625	No
	Ebang vs Mbankomo	0.0742043	1.74964	2.93581	0.189543	0.0975	No
	Ebang vs Messassi	0.0173615	0.426993	2.78903	0.669853	0.05	No
	Messassi vs Nkometou	0.0989343	2.93692	3.03371	0.0192827	0.142625	Yes
	Messassi vs Nkolbissong	0.0944018	1.83838	2.93581	0.159869	0.0975	No
	Messassi vs Mbankomo	0.0568429	1.42093	2.78903	0.156926	0.05	No
	Mbankomo vs Nkometou	0.0420914	1.17637	2.93581	0.468685	0.0975	No
	Mbankomo vs Nkolbissong	0.0375589	0.712042	2.78903	0.477286	0.05	No
	Nkolbissong vs Nkometou	0.0045325	0.0941653	2.78903	0.925074	0.05	No
	Category	LS means	Standard error	Lower bound (95%)	Upper bound (95%)	Groups
	Ebang	0.612576	0.030427	0.552569	0.672582	A
	Messassi	0.595214	0.0269707	0.542024	0.648404	A
	Mbankomo	0.538371	0.0295449	0.480105	0.596638	A	B
	Nkolbissong	0.500812	0.0436975	0.414635	0.58699	A	B
	Nkometou	0.49628	0.020183	0.456476	0.536084		B
	Regression of variable LoYc:
	Goodness of fit statistics (LoYc):
	Observations	201
	Sum of weights	201
	DF	196
	R²	0.0785255
	Adjusted R²	0.0597199
	MSE	0.110062
	RMSE	0.331755
	MAPE
	DW
	Cp	5
	AIC	-438.613
	SBC	-422.097
	PC	0.968489
	Analysis of variance (LoYc):
	Source	DF	Sum of squares	Mean squares	F	Pr > F
	Model	4	1.83831	0.459578	4.17564	0.00287515
	Error	196	21.5721	0.110062
	Corrected Total	200	23.4104
	Computed against model Y=Mean(Y)
	Model parameters (LoYc):
	Source	Value	Standard error	t	Pr > |t|	Lower bound (95%)	Upper bound (95%)
	Intercept	1.26256	0.0383078	32.9583	7.0902e-82	1.18701	1.33811
	Locality-Ebang	-0.0297418	0.0693014	-0.429166	0.668274	-0.166414	0.10693
	Locality-Mbankomo	-0.230417	0.0679125	-3.39286	0.00083682	-0.36435	-0.0964842
	Locality-Messassi	-0.0924886	0.0639375	-1.44655	0.149621	-0.218582	0.0336051
	Locality-Nkolbissong	-0.25331	0.0913583	-2.77271	0.00609559	-0.433481	-0.0731386
	Locality-Nkometou	0	0
	Equation of the model (LoYc):
	LoYc = 1.26256-0.029741818181818*Locality-Ebang-0.230417142857143*Locality-Mbankomo-9.24885714285715E-02*Locality-Messassi-0.25331*Locality-Nkolbissong
	Interpretation (LoYc):
	Given the R2, 8% of the variability of the dependent variable LoYc is explained by the explanatory variable.
	Given the p-value of the F statistic computed in the ANOVA table, and given the significance level of 5%, the information brought by the explanatory variables is significantly better than what a basic mean would bring.
	Means charts:
	Locality / Duncan / Analysis of the differences between the categories with a confidence interval of 95% (LoYc):
	Contrast	Difference	Standardized difference	Critical value	Pr > Diff	alpha (Modified)	Significant
	Nkometou vs Nkolbissong	0.25331	2.77271	3.10578	0.047477	0.185494	Yes
	Nkometou vs Mbankomo	0.230417	3.39286	3.03371	0.00461131	0.142625	Yes
	Nkometou vs Messassi	0.0924886	1.44655	2.93581	0.319175	0.0975	No
	Nkometou vs Ebang	0.0297418	0.429166	2.78903	0.668274	0.05	No
	Ebang vs Nkolbissong	0.223568	2.21213	3.03371	0.123521	0.142625	Yes
	Ebang vs Mbankomo	0.200675	2.49295	2.93581	0.035839	0.0975	Yes
	Ebang vs Messassi	0.0627468	0.813063	2.78903	0.417168	0.05	No
	Messassi vs Nkolbissong	0.160821	1.65005	2.93581	0.22729	0.0975	No
	Messassi vs Mbankomo	0.137929	1.81656	2.78903	0.0708121	0.05	No
	Mbankomo vs Nkolbissong	0.0228929	0.22866	2.78903	0.819371	0.05	No
	Category	LS means	Standard error	Lower bound (95%)	Upper bound (95%)	Groups
	Nkometou	1.26256	0.0383078	1.18701	1.33811	A
	Ebang	1.23282	0.0577512	1.11892	1.34671	A
	Messassi	1.17007	0.0511909	1.06912	1.27103	A	B
	Mbankomo	1.03214	0.0560769	0.921551	1.14273		B
	Nkolbissong	1.00925	0.0829388	0.845683	1.17282		B
	Regression of variable LaYc:
	Goodness of fit statistics (LaYc):
	Observations	201
	Sum of weights	201
	DF	196
	R²	0.0171247
	Adjusted R²	-0.00293394
	MSE	0.0515837
	RMSE	0.22712
	MAPE
	DW
	Cp	5
	AIC	-590.938
	SBC	-574.421
	PC	1.03302
	Analysis of variance (LaYc):
	Source	DF	Sum of squares	Mean squares	F	Pr > F
	Model	4	0.176155	0.0440386	0.853732	0.492823
	Error	196	10.1104	0.0515837
	Corrected Total	200	10.2866
	Computed against model Y=Mean(Y)
	Model parameters (LaYc):
	Source	Value	Standard error	t	Pr > |t|	Lower bound (95%)	Upper bound (95%)
	Intercept	0.38176	0.0262256	14.5568	5.03906e-33	0.330039	0.433481
	Locality-Ebang	0.0308461	0.0474439	0.650159	0.516351	-0.06272	0.124412
	Locality-Mbankomo	0.07654	0.046493	1.64627	0.101311	-0.0151508	0.168231
	Locality-Messassi	0.0344781	0.0437717	0.787679	0.431836	-0.0518459	0.120802
	Locality-Nkolbissong	0.0750525	0.0625441	1.19999	0.23159	-0.0482932	0.198398
	Locality-Nkometou	0	0
	Equation of the model (LaYc):
	LaYc = 0.38176+3.08460606060608E-02*Locality-Ebang+7.65400000000002E-02*Locality-Mbankomo+3.44780952380956E-02*Locality-Messassi+7.50525000000002E-02*Locality-Nkolbissong
	Interpretation (LaYc):
	Given the R2, 2% of the variability of the dependent variable LaYc is explained by the explanatory variable.
	Given the p-value of the F statistic computed in the ANOVA table, and given the significance level of 5%, the information brought by the explanatory variables is not significantly better than what a basic mean would bring. The fact that variables do not bring significant information to the model may be interpreted in different ways: Either the variables do not contribute to the model, or some cov…
	Means charts:
	Locality / Duncan / Analysis of the differences between the categories with a confidence interval of 95% (LaYc):
	Contrast	Difference	Standardized difference	Critical value	Pr > Diff	alpha (Modified)	Significant
	Mbankomo vs Nkometou	0.07654	1.64627	3.10578	0.469805	0.185494	No
	Mbankomo vs Ebang	0.0456939	0.829161	3.03371	0.840574	0.142625	No
	Mbankomo vs Messassi	0.0420619	0.809182	2.93581	0.69779	0.0975	No
	Mbankomo vs Nkolbissong	0.0014875	0.0217025	2.78903	0.982707	0.05	No
	Nkolbissong vs Nkometou	0.0750525	1.19999	3.03371	0.627578	0.142625	No
	Nkolbissong vs Ebang	0.0442064	0.638923	2.93581	0.798826	0.0975	No
	Nkolbissong vs Messassi	0.0405744	0.608088	2.78903	0.543833	0.05	No
	Messassi vs Nkometou	0.0344781	0.787679	2.93581	0.711042	0.0975	No
	Messassi vs Ebang	0.00363203	0.0687456	2.78903	0.945262	0.05	No
	Ebang vs Nkometou	0.0308461	0.650159	2.78903	0.516351	0.05	No
	Category	LS means	Standard error	Lower bound (95%)	Upper bound (95%)	Groups
	Mbankomo	0.4583	0.0383904	0.382589	0.534011	A
	Nkolbissong	0.456812	0.0567801	0.344834	0.568791	A
	Messassi	0.416238	0.0350454	0.347124	0.485353	A
	Ebang	0.412606	0.0395366	0.334634	0.490578	A
	Nkometou	0.38176	0.0262256	0.330039	0.433481	A
	Regression of variable NC:
	Goodness of fit statistics (NC):
	Observations	201
	Sum of weights	201
	DF	196
	R²	0.45145
	Adjusted R²	0.440255
	MSE	0.133587
	RMSE	0.365495
	MAPE
	DW
	Cp	5
	AIC	-399.677
	SBC	-383.16
	PC	0.576537
	Analysis of variance (NC):
	Source	DF	Sum of squares	Mean squares	F	Pr > F
	Model	4	21.5483	5.38708	40.3264	1.25526e-24
	Error	196	26.183	0.133587
	Corrected Total	200	47.7313
	Computed against model Y=Mean(Y)
	Model parameters (NC):
	Source	Value	Standard error	t	Pr > |t|	Lower bound (95%)	Upper bound (95%)
	Intercept	6.29333	0.0422038	149.118	1.03029e-203	6.2101	6.37657
	Locality-Ebang	0.070303	0.0763495	0.920805	0.358284	-0.080269	0.220875
	Locality-Mbankomo	0.706667	0.0748193	9.44498	0	0.559112	0.854221
	Locality-Messassi	0.706667	0.07044	10.0322	0	0.567749	0.845584
	Locality-Nkolbissong	0.456667	0.10065	4.53719	9.92515e-06	0.258171	0.655162
	Locality-Nkometou	0	0
	Equation of the model (NC):
	NC = 6.29333333333333+7.03030303030324E-02*Locality-Ebang+0.706666666666669*Locality-Mbankomo+0.70666666666667*Locality-Messassi+0.456666666666668*Locality-Nkolbissong
	Interpretation (NC):
	Given the R2, 45% of the variability of the dependent variable NC is explained by the explanatory variable.
	Given the p-value of the F statistic computed in the ANOVA table, and given the significance level of 5%, the information brought by the explanatory variables is significantly better than what a basic mean would bring.
	Means charts:
	Locality / Duncan / Analysis of the differences between the categories with a confidence interval of 95% (NC):
	Contrast	Difference	Standardized difference	Critical value	Pr > Diff	alpha (Modified)	Significant
	Messassi vs Nkometou	0.706667	10.0322	3.10578	0	0.185494	Yes
	Messassi vs Ebang	0.636364	7.4847	3.03371	1.40981e-11	0.142625	Yes
	Messassi vs Nkolbissong	0.25	2.32825	2.93581	0.0542804	0.0975	Yes
	Messassi vs Mbankomo	7.77156e-16	9.29051e-15	2.78903	1	0.05	No
	Mbankomo vs Nkometou	0.706667	9.44498	3.03371	0	0.142625	Yes
	Mbankomo vs Ebang	0.636364	7.17563	2.93581	4.32936e-11	0.0975	Yes
	Mbankomo vs Nkolbissong	0.25	2.26656	2.78903	0.0245093	0.05	Yes
	Nkolbissong vs Nkometou	0.456667	4.53719	2.93581	2.9474e-05	0.0975	Yes
	Nkolbissong vs Ebang	0.386364	3.47003	2.78903	0.000639924	0.05	Yes
	Ebang vs Nkometou	0.070303	0.920805	2.78903	0.358284	0.05	No
	Category	LS means	Standard error	Lower bound (95%)	Upper bound (95%)	Groups
	Messassi	7	0.0563972	6.88878	7.11122	A
	Mbankomo	7	0.06178	6.87816	7.12184	A
	Nkolbissong	6.75	0.0913739	6.5698	6.9302		B
	Ebang	6.36364	0.0636246	6.23816	6.48911			C
	Nkometou	6.29333	0.0422038	6.2101	6.37657			C
	Summary for all Ys:
		LoCo	LoAb	LoThx	LoT	LaT	LoAn	LoAA	LaAA	LoAP	LaAP	LoF	LoTi	LaTi	LoM	LaM	DoD	DooD	La1T	La2T	La3T	La4T	LoYc	LaYc	NC
	R²	0.0804916	0.0647767	0.0525843	0.0400976	0.135655	0.484157	0.11291	0.193879	0.104811	0.121085	0.225472	0.0571502	0.111511	0.0873165	0.176587	0.0609527	0.027675	0.0614436	0.0621689	0.0788417	0.0723568	0.0785255	0.0171247	0.45145
	F	4.28935	3.39391	2.71964	2.04686	7.6903	45.9901	6.23681	11.7849	5.73704	6.75054	14.2643	2.9701	6.14983	4.68784	10.5084	3.18055	1.39467	3.20784	3.24821	4.1939	3.82203	4.17564	0.853732	40.3264
	Pr > F	0.0023838	0.0103723	0.0309089	0.0893435	8.9231e-06	3.25102e-27	9.60175e-05	1.34358e-08	0.000218589	4.13295e-05	3.08442e-10	0.0206519	0.000110779	0.00123509	9.84315e-08	0.0146829	0.237217	0.0140457	0.0131528	0.00278997	0.00514441	0.00287515	0.492823	1.25526e-24
	Summary of all pairwise comparisons for Locality (Duncan):
	Category	LS means(LoCo)	Groups
	Messassi	5.82379	A
	Nkometou	5.76356	A
	Ebang	5.675	A	B
	Mbankomo	5.40206		B	C
	Nkolbissong	5.25069			C
	Category	LS means(LoAb)	Groups
	Nkometou	3.34863	A
	Ebang	3.31409	A	B
	Mbankomo	3.24406	A	B	C
	Messassi	3.15123		B	C
	Nkolbissong	3.01422			C
	Category	LS means(LoThx)	Groups
	Nkometou	1.60477	A
	Nkolbissong	1.54725	A	B
	Mbankomo	1.5424	A	B
	Messassi	1.52795	A	B
	Ebang	1.42885		B
	Category	LS means(LoT)	Groups
	Ebang	1.63258	A
	Nkometou	1.62941	A
	Nkolbissong	1.50787	A
	Messassi	1.47972	A
	Mbankomo	1.38817	A
	Category	LS means(LaT)	Groups
	Nkometou	2.12139	A
	Ebang	2.03715	A
	Messassi	2.03145	A
	Nkolbissong	1.75519		B
	Mbankomo	1.6576		B
	Category	LS means(LoAn)	Groups
	Nkometou	2.37947	A
	Messassi	2.24338	A	B
	Ebang	2.11912		B
	Nkolbissong	1.67894			C
	Mbankomo	1.25297				D
	Category	LS means(LoAA)	Groups
	Ebang	4.78888	A
	Nkolbissong	4.45756	A	B
	Nkometou	4.44123		B
	Messassi	4.30007		B	C
	Mbankomo	4.02129			C
	Category	LS means(LaAA)	Groups
	Ebang	1.66452	A
	Nkometou	1.53713	A	B
	Messassi	1.49833	A	B
	Nkolbissong	1.36525		B
	Mbankomo	1.1006			C
	Category	LS means(LoAP)	Groups
	Messassi	3.44012	A
	Ebang	3.38109	A
	Nkometou	3.37039	A
	Nkolbissong	3.1315		B
	Mbankomo	3.04649		B
	Category	LS means(LaAP)	Groups
	Messassi	0.958145	A
	Nkometou	0.863267		B
	Ebang	0.845788		B
	Nkolbissong	0.828062		B	C
	Mbankomo	0.718143			C
	Category	LS means(LoF)	Groups
	Mbankomo	1.65877	A
	Nkolbissong	1.58519	A
	Ebang	1.46036		B
	Nkometou	1.39236		B
	Messassi	1.38133		B
	Category	LS means(LoTi)	Groups
	Ebang	1.87424	A
	Nkometou	1.80311	A	B
	Nkolbissong	1.76375	A	B	C
	Messassi	1.74919		B	C
	Mbankomo	1.69129			C
	Category	LS means(LaTi)	Groups
	Ebang	0.69503	A
	Nkolbissong	0.681312	A
	Mbankomo	0.654914	A	B
	Nkometou	0.62572		B	C
	Messassi	0.596357			C
	Category	LS means(LoM)	Groups
	Ebang	1.33636	A
	Nkolbissong	0.5915		B
	Nkometou	0.582467		B
	Messassi	0.569833		B
	Mbankomo	0.5474		B
	Category	LS means(LaM)	Groups
	Mbankomo	0.387743	A
	Nkolbissong	0.382625	A
	Ebang	0.37197	A
	Nkometou	0.311547		B
	Messassi	0.299548		B
	Category	LS means(DoD)	Groups
	Nkometou	0.43784	A
	Nkolbissong	0.417187	A	B
	Messassi	0.400429	A	B
	Mbankomo	0.385514		B
	Ebang	0.376545		B
	Category	LS means(DooD)	Groups
	Nkometou	0.396507	A
	Mbankomo	0.379097	A
	Messassi	0.378238	A
	Ebang	0.364788	A
	Nkolbissong	0.363187	A
	Category	LS means(La1T)	Groups
	Messassi	1.00593	A
	Nkometou	0.99652	A
	Ebang	0.932364	A	B
	Nkolbissong	0.92	A	B
	Mbankomo	0.867543		B
	Category	LS means(La2T)	Groups
	Nkometou	0.927787	A
	Messassi	0.903381	A	B
	Ebang	0.902879	A	B
	Mbankomo	0.832057		B
	Nkolbissong	0.808375		B
	Category	LS means(La3T)	Groups
	Messassi	0.742333	A
	Ebang	0.741879	A
	Nkometou	0.702893	A	B
	Mbankomo	0.647343		B	C
	Nkolbissong	0.595			C
	Category	LS means(La4T)	Groups
	Ebang	0.612576	A
	Messassi	0.595214	A
	Mbankomo	0.538371	A	B
	Nkolbissong	0.500812	A	B
	Nkometou	0.49628		B
	Category	LS means(LoYc)	Groups
	Nkometou	1.26256	A
	Ebang	1.23282	A
	Messassi	1.17007	A	B
	Mbankomo	1.03214		B
	Nkolbissong	1.00925		B
	Category	LS means(LaYc)	Groups
	Mbankomo	0.4583	A
	Nkolbissong	0.456812	A
	Messassi	0.416238	A
	Ebang	0.412606	A
	Nkometou	0.38176	A
	Category	LS means(NC)	Groups
	Messassi	7	A
	Mbankomo	7	A
	Nkolbissong	6.75		B
	Ebang	6.36364			C
	Nkometou	6.29333			C
	Summary (LS means) - Locality:
		LoCo	LoAb	LoThx	LoT	LaT	LoAn	LoAA	LaAA	LoAP	LaAP	LoF	LoTi	LaTi	LoM	LaM	DoD	DooD	La1T	La2T	La3T	La4T	LoYc	LaYc	NC
	Nkometou	5.76356	3.34863	1.60477	1.62941	2.12139	2.37947	4.44123	1.53713	3.37039	0.863267	1.39236	1.80311	0.62572	0.582467	0.311547	0.43784	0.396507	0.99652	0.927787	0.702893	0.49628	1.26256	0.38176	6.29333
	Ebang	5.675	3.31409	1.42885	1.63258	2.03715	2.11912	4.78888	1.66452	3.38109	0.845788	1.46036	1.87424	0.69503	1.33636	0.37197	0.376545	0.364788	0.932364	0.902879	0.741879	0.612576	1.23282	0.412606	6.36364
	Messassi	5.82379	3.15123	1.52795	1.47972	2.03145	2.24338	4.30007	1.49833	3.44012	0.958145	1.38133	1.74919	0.596357	0.569833	0.299548	0.400429	0.378238	1.00593	0.903381	0.742333	0.595214	1.17007	0.416238	7
	Nkolbissong	5.25069	3.01422	1.54725	1.50787	1.75519	1.67894	4.45756	1.36525	3.1315	0.828062	1.58519	1.76375	0.681312	0.5915	0.382625	0.417187	0.363187	0.92	0.808375	0.595	0.500812	1.00925	0.456812	6.75
	Mbankomo	5.40206	3.24406	1.5424	1.38817	1.6576	1.25297	4.02129	1.1006	3.04649	0.718143	1.65877	1.69129	0.654914	0.5474	0.387743	0.385514	0.379097	0.867543	0.832057	0.647343	0.538371	1.03214	0.4583	7
	Pr > F(Model)	0.0023838	0.0103723	0.0309089	0.0893435	8.9231e-06	3.25102e-27	9.60175e-05	1.34358e-08	0.000218589	4.13295e-05	3.08442e-10	0.0206519	0.000110779	0.00123509	9.84315e-08	0.0146829	0.237217	0.0140457	0.0131528	0.00278997	0.00514441	0.00287515	0.492823	1.25526e-24
	Significant	Yes	Yes	Yes	No	Yes	Yes	Yes	Yes	Yes	Yes	Yes	Yes	Yes	Yes	Yes	Yes	No	Yes	Yes	Yes	Yes	Yes	No	Yes
		LoCo	LoAb	LoThx	LoT	LaT	LoAn	LoAA	LaAA	LoAP	LaAP	LoF	LoTi	LaTi	LoM	LaM	DoD	DooD	La1T	La2T	La3T	La4T	LoYc	LaYc	NC
	Nkometou	5.76356	3.34863	1.60477	1.62941	2.12139	2.37947	4.44123	1.53713	3.37039	0.863267	1.39236	1.80311	0.62572	0.582467	0.311547	0.43784	0.396507	0.99652	0.927787	0.702893	0.49628	1.26256	0.38176	6.29333
	Ebang	5.675	3.31409	1.42885	1.63258	2.03715	2.11912	4.78888	1.66452	3.38109	0.845788	1.46036	1.87424	0.69503	1.33636	0.37197	0.376545	0.364788	0.932364	0.902879	0.741879	0.612576	1.23282	0.412606	6.36364
	Messassi	5.82379	3.15123	1.52795	1.47972	2.03145	2.24338	4.30007	1.49833	3.44012	0.958145	1.38133	1.74919	0.596357	0.569833	0.299548	0.400429	0.378238	1.00593	0.903381	0.742333	0.595214	1.17007	0.416238	7
	Nkolbissong	5.25069	3.01422	1.54725	1.50787	1.75519	1.67894	4.45756	1.36525	3.1315	0.828062	1.58519	1.76375	0.681312	0.5915	0.382625	0.417187	0.363187	0.92	0.808375	0.595	0.500812	1.00925	0.456812	6.75
	Mbankomo	5.40206	3.24406	1.5424	1.38817	1.6576	1.25297	4.02129	1.1006	3.04649	0.718143	1.65877	1.69129	0.654914	0.5474	0.387743	0.385514	0.379097	0.867543	0.832057	0.647343	0.538371	1.03214	0.4583	7

## Sheet: XLSTAT_20220714_122049_1_HID1
	LoCo
Nkometou	0
Ebang	0
Messassi	0
Nkolbissong	0
Mbankomo	0

## Sheet: XLSTAT_20220714_122049_1_HID
	Category	LS mean	Standard error	Lower bound (95%)	Upper bound (95%)
	Ebang	5.675	0.110767	5.45655	5.89345
	Mbankomo	5.40206	0.107556	5.18994	5.61417
	Messassi	5.82379	0.0981844	5.63015	6.01742
	Nkolbissong	5.25069	0.159077	4.93697	5.56441
	Nkometou	5.76356	0.0734745	5.61866	5.90846
	Category	LS mean	Standard error	Lower bound (95%)	Upper bound (95%)
	Ebang	3.31409	0.0693724	3.17728	3.4509
	Mbankomo	3.24406	0.0673612	3.11121	3.3769
	Messassi	3.15123	0.0614921	3.02996	3.2725
	Nkolbissong	3.01422	0.0996285	2.81774	3.21071
	Nkometou	3.34863	0.0460164	3.25788	3.43938
	Category	LS mean	Standard error	Lower bound (95%)	Upper bound (95%)
	Ebang	1.42885	0.0449568	1.34019	1.51751
	Mbankomo	1.5424	0.0436534	1.45631	1.62849
	Messassi	1.52795	0.0398499	1.44936	1.60654
	Nkolbissong	1.54725	0.0645642	1.41992	1.67458
	Nkometou	1.60477	0.0298209	1.54596	1.66358
	Category	LS mean	Standard error	Lower bound (95%)	Upper bound (95%)
	Ebang	1.63258	0.0827164	1.46945	1.7957
	Mbankomo	1.38817	0.0803183	1.22977	1.54657
	Messassi	1.47972	0.0733202	1.33512	1.62432
	Nkolbissong	1.50787	0.118792	1.2736	1.74215
	Nkometou	1.62941	0.0548678	1.52121	1.73762
	Category	LS mean	Standard error	Lower bound (95%)	Upper bound (95%)
	Ebang	2.03715	0.0779278	1.88347	2.19084
	Mbankomo	1.6576	0.0756685	1.50837	1.80683
	Messassi	2.03145	0.0690756	1.89523	2.16768
	Nkolbissong	1.75519	0.111915	1.53447	1.9759
	Nkometou	2.12139	0.0516915	2.01944	2.22333
	Category	LS mean	Standard error	Lower bound (95%)	Upper bound (95%)
	Ebang	2.11912	0.0751652	1.97088	2.26736
	Mbankomo	1.25297	0.072986	1.10903	1.39691
	Messassi	2.24338	0.0666268	2.11198	2.37478
	Nkolbissong	1.67894	0.107948	1.46605	1.89183
	Nkometou	2.37947	0.0498589	2.28114	2.4778
	Category	LS mean	Standard error	Lower bound (95%)	Upper bound (95%)
	Ebang	4.78888	0.113516	4.56501	5.01275
	Mbankomo	4.02129	0.110225	3.80391	4.23866
	Messassi	4.30007	0.100621	4.10163	4.49851
	Nkolbissong	4.45756	0.163025	4.13605	4.77907
	Nkometou	4.44123	0.0752979	4.29273	4.58972
	Category	LS mean	Standard error	Lower bound (95%)	Upper bound (95%)
	Ebang	1.66452	0.0649024	1.53652	1.79251
	Mbankomo	1.1006	0.0630208	0.976314	1.22489
	Messassi	1.49833	0.0575299	1.38488	1.61179
	Nkolbissong	1.36525	0.093209	1.18143	1.54907
	Nkometou	1.53713	0.0430514	1.45223	1.62204
	Category	LS mean	Standard error	Lower bound (95%)	Upper bound (95%)
	Ebang	3.38109	0.0735014	3.23614	3.52605
	Mbankomo	3.04649	0.0713705	2.90573	3.18724
	Messassi	3.44012	0.065152	3.31163	3.56861
	Nkolbissong	3.1315	0.105558	2.92332	3.33968
	Nkometou	3.37039	0.0487553	3.27423	3.46654
	Category	LS mean	Standard error	Lower bound (95%)	Upper bound (95%)
	Ebang	0.845788	0.0354575	0.775861	0.915715
	Mbankomo	0.718143	0.0344295	0.650243	0.786043
	Messassi	0.958145	0.0314297	0.896161	1.02013
	Nkolbissong	0.828062	0.0509219	0.727637	0.928488
	Nkometou	0.863267	0.0235198	0.816882	0.909651
	Category	LS mean	Standard error	Lower bound (95%)	Upper bound (95%)
	Ebang	1.46036	0.0344521	1.39242	1.52831
	Mbankomo	1.65877	0.0334533	1.5928	1.72475
	Messassi	1.38133	0.0305385	1.32111	1.44156
	Nkolbissong	1.58519	0.0494781	1.48761	1.68277
	Nkometou	1.39236	0.022853	1.34729	1.43743
	Category	LS mean	Standard error	Lower bound (95%)	Upper bound (95%)
	Ebang	1.87424	0.0407966	1.79379	1.9547
	Mbankomo	1.69129	0.0396139	1.61316	1.76941
	Messassi	1.74919	0.0361624	1.67787	1.82051
	Nkolbissong	1.76375	0.0585897	1.6482	1.8793
	Nkometou	1.80311	0.0270614	1.74974	1.85648
	Category	LS mean	Standard error	Lower bound (95%)	Upper bound (95%)
	Ebang	0.69503	0.0168424	0.661815	0.728246
	Mbankomo	0.654914	0.0163541	0.622662	0.687167
	Messassi	0.596357	0.0149292	0.566915	0.6258
	Nkolbissong	0.681312	0.0241881	0.63361	0.729015
	Nkometou	0.62572	0.011172	0.603687	0.647753
	Category	LS mean	Standard error	Lower bound (95%)	Upper bound (95%)
	Ebang	1.33636	0.161372	1.01811	1.65461
	Mbankomo	0.5474	0.156694	0.238377	0.856423
	Messassi	0.569833	0.143041	0.287736	0.851931
	Nkolbissong	0.5915	0.231754	0.134449	1.04855
	Nkometou	0.582467	0.107042	0.371364	0.793569
	Category	LS mean	Standard error	Lower bound (95%)	Upper bound (95%)
	Ebang	0.37197	0.0139808	0.344398	0.399542
	Mbankomo	0.387743	0.0135754	0.36097	0.414516
	Messassi	0.299548	0.0123926	0.275108	0.323988
	Nkolbissong	0.382625	0.0200783	0.343028	0.422222
	Nkometou	0.311547	0.00927378	0.293257	0.329836
	Category	LS mean	Standard error	Lower bound (95%)	Upper bound (95%)
	Ebang	0.376545	0.0169483	0.343121	0.40997
	Mbankomo	0.385514	0.016457	0.353059	0.41797
	Messassi	0.400429	0.0150231	0.370801	0.430056
	Nkolbissong	0.417187	0.0243402	0.369185	0.46519
	Nkometou	0.43784	0.0112422	0.415669	0.460011
	Category	LS mean	Standard error	Lower bound (95%)	Upper bound (95%)
	Ebang	0.364788	0.0132054	0.338745	0.390831
	Mbankomo	0.379097	0.0128226	0.353809	0.404385
	Messassi	0.378238	0.0117054	0.355153	0.401323
	Nkolbissong	0.363187	0.0189648	0.325786	0.400589
	Nkometou	0.396507	0.00875948	0.379232	0.413782
	Category	LS mean	Standard error	Lower bound (95%)	Upper bound (95%)
	Ebang	0.932364	0.0356631	0.862031	1.0027
	Mbankomo	0.867543	0.0346292	0.799249	0.935836
	Messassi	1.00593	0.031612	0.943585	1.06827
	Nkolbissong	0.92	0.0512172	0.818992	1.02101
	Nkometou	0.99652	0.0236562	0.949867	1.04317
	Category	LS mean	Standard error	Lower bound (95%)	Upper bound (95%)
	Ebang	0.902879	0.0282843	0.847098	0.958659
	Mbankomo	0.832057	0.0274643	0.777894	0.886221
	Messassi	0.903381	0.0250713	0.853937	0.952825
	Nkolbissong	0.808375	0.0406202	0.728266	0.888484
	Nkometou	0.927787	0.0187617	0.890786	0.964787
	Category	LS mean	Standard error	Lower bound (95%)	Upper bound (95%)
	Ebang	0.741879	0.0271183	0.688398	0.79536
	Mbankomo	0.647343	0.0263321	0.595412	0.699273
	Messassi	0.742333	0.0240378	0.694927	0.789739
	Nkolbissong	0.595	0.0389457	0.518194	0.671806
	Nkometou	0.702893	0.0179882	0.667418	0.738369
	Category	LS mean	Standard error	Lower bound (95%)	Upper bound (95%)
	Ebang	0.612576	0.030427	0.552569	0.672582
	Mbankomo	0.538371	0.0295449	0.480105	0.596638
	Messassi	0.595214	0.0269707	0.542024	0.648404
	Nkolbissong	0.500812	0.0436975	0.414635	0.58699
	Nkometou	0.49628	0.020183	0.456476	0.536084
	Category	LS mean	Standard error	Lower bound (95%)	Upper bound (95%)
	Ebang	1.23282	0.0577512	1.11892	1.34671
	Mbankomo	1.03214	0.0560769	0.921551	1.14273
	Messassi	1.17007	0.0511909	1.06912	1.27103
	Nkolbissong	1.00925	0.0829388	0.845683	1.17282
	Nkometou	1.26256	0.0383078	1.18701	1.33811
	Category	LS mean	Standard error	Lower bound (95%)	Upper bound (95%)
	Ebang	0.412606	0.0395366	0.334634	0.490578
	Mbankomo	0.4583	0.0383904	0.382589	0.534011
	Messassi	0.416238	0.0350454	0.347124	0.485353
	Nkolbissong	0.456812	0.0567801	0.344834	0.568791
	Nkometou	0.38176	0.0262256	0.330039	0.433481
	Category	LS mean	Standard error	Lower bound (95%)	Upper bound (95%)
	Ebang	6.36364	0.0636246	6.23816	6.48911
	Mbankomo	7	0.06178	6.87816	7.12184
	Messassi	7	0.0563972	6.88878	7.11122
	Nkolbissong	6.75	0.0913739	6.5698	6.9302
	Nkometou	6.29333	0.0422038	6.2101	6.37657

## Sheet: AHC
	You are using the XLSTAT trial version. Number of days remaining until the trial expires: 14
	XLSTAT 2022.3.1.1330 - Agglomerative hierarchical clustering (AHC) - Start time: 07/14/2022 at 12:13:58 / End time: 07/14/2022 at 12:14:00 / Microsoft Excel 16.015225
	Observations/variables table: Workbook = Results morphobiometry.xlsx / Sheet = Dactylurina / Range = Dactylurina!$B$1:$Y$202 / 201 rows and 24 columns
	Cluster rows
	Dissimilarity: Euclidean distance
	Agglomeration method: Ward's method
	Center: No / Reduce: No
	Truncation: Hartigan index (adapted)
	Summary statistics:
	Variable	Observations	Obs. with missing data	Obs. without missing data	Minimum	Maximum	Mean	Std. deviation
	LoCo	201	0	201	2.557	6.971	5.65783	0.656905
	LoAb	201	0	201	1.521	4.145	3.25688	0.407943
	LoThx	201	0	201	0.57	1.978	1.5444	0.26266
	LoT	201	0	201	0.637	4.43	1.54697	0.480118
	LaT	201	0	201	0.78	3.45	1.97886	0.476671
	LoAn	201	0	201	0.567	3.15	2.05637	0.595152
	LoAA	201	0	201	1.743	6.96	4.39699	0.685398
	LaAA	201	0	201	0.449	2.881	1.46024	0.411084
	LoAP	201	0	201	1.194	4.98	3.3113	0.441782
	LaAP	201	0	201	0.324	1.64	0.85215	0.215082
	LoF	201	0	201	0.791	2.156	1.46296	0.222622
	LoTi	201	0	201	0.75	2.103	1.78092	0.238931
	LaTi	201	0	201	0.296	0.855	0.640473	0.101613
	LoM	201	0	201	0.247	8.971	0.698214	0.960593
	LaM	201	0	201	0.14	0.62	0.337886	0.0876176
	DoD	201	0	201	0.183	0.774	0.409204	0.099461
	DooD	201	0	201	0.111	0.579	0.381798	0.0761582
	La1T	201	0	201	0.413	1.875	0.959403	0.209343
	La2T	201	0	201	0.378	1.58	0.892423	0.166094
	La3T	201	0	201	0.305	1.222	0.699274	0.160681
	La4T	201	0	201	0.197	1.799	0.543736	0.179655
	LoYc	201	0	201	0.23	1.856	1.17806	0.342128
	LaYc	201	0	201	0.198	1.899	0.413331	0.226788
	NC	201	0	201	6	7	6.61194	0.488525
	Node statistics:
	Node	Level	Weight	Objects	Left son	Right son
	401	228.703	201	201	370	400
	400	129.836	198	198	398	399
	399	91.617	158	158	387	397
	398	42.0339	40	40	377	395
	397	39.3492	128	128	378	396
	396	31.827	109	109	393	394
	395	29.8445	18	18	271	390
	394	16.4372	54	54	385	391
	393	14.3363	55	55	384	392
	392	10.2901	45	45	380	388
	391	9.71993	13	13	227	382
	390	9.67882	16	16	343	389
	389	8.20637	10	10	241	261
	388	7.94042	38	38	379	381
	387	7.21869	30	30	372	386
	386	4.63862	12	12	363	366
	385	4.62622	41	41	367	383
	384	4.23622	10	10	321	375
	383	3.90391	21	21	45	374
	382	3.86737	11	11	292	368
	381	3.53978	8	8	350	352
	380	3.48068	7	7	327	369
	379	3.04553	30	30	373	376
	378	2.75473	19	19	361	362
	377	2.71464	22	22	269	339
	376	2.68918	17	17	346	364
	375	2.67475	7	7	333	357
	374	2.6448	20	20	365	371
	373	2.31285	13	13	278	354
	372	2.18835	18	18	331	334
	371	2.0507	17	17	345	360
	370	1.97079	3	3	106	336
	369	1.87272	5	5	356	359
	368	1.80038	8	8	222	353
	367	1.5601	20	20	330	355
	366	1.54294	8	8	340	351
	365	1.53871	3	3	28	337
	364	1.48282	13	13	335	358
	363	1.42975	4	4	263	319
	362	1.41703	5	5	283	326
	361	1.38845	14	14	110	338
	360	1.32971	7	7	296	320
	359	1.22915	2	2	101	174
	358	1.1734	4	4	149	322
	357	1.1625	3	3	55	325
	356	1.08067	3	3	179	344
	355	1.03203	14	14	348	349
	354	1.0148	11	11	309	347
	353	0.999445	6	6	153	341
	352	0.962007	6	6	254	306
	351	0.912592	3	3	192	323
	350	0.90657	2	2	42	44
	349	0.897217	4	4	148	276
	348	0.888785	10	10	316	324
	347	0.858492	8	8	300	310
	346	0.856913	4	4	213	220
	345	0.855605	10	10	297	342
	344	0.817806	2	2	19	94
	343	0.80587	6	6	116	315
	342	0.784503	6	6	103	314
	341	0.746619	5	5	305	312
	340	0.740128	5	5	294	303
	339	0.729096	19	19	281	318
	338	0.728293	13	13	229	332
	337	0.712632	2	2	172	173
	336	0.708944	2	2	105	107
	335	0.702194	9	9	221	313
	334	0.684305	6	6	32	317
	333	0.678826	4	4	50	298
	332	0.665346	10	10	275	328
	331	0.652402	12	12	264	329
	330	0.629517	6	6	251	311
	329	0.584673	8	8	246	307
	328	0.561789	7	7	131	279
	327	0.503189	2	2	13	14
	326	0.457495	2	2	57	84
	325	0.452539	2	2	47	48
	324	0.443749	7	7	285	302
	323	0.437319	2	2	190	191
	322	0.422369	3	3	25	270
	321	0.419401	3	3	54	280
	320	0.40215	5	5	233	304
	319	0.39247	2	2	194	195
	318	0.391508	15	15	258	308
	317	0.389613	5	5	266	299
	316	0.383775	3	3	180	293
	315	0.381609	5	5	202	295
	314	0.374654	5	5	207	286
	313	0.37092	6	6	260	284
	312	0.366227	2	2	83	155
	311	0.349656	4	4	160	301
	310	0.343899	5	5	236	288
	309	0.323492	3	3	99	274
	308	0.314831	10	10	265	273
	307	0.29326	6	6	36	287
	306	0.282147	4	4	86	239
	305	0.273684	3	3	122	277
	304	0.271676	3	3	177	268
	303	0.249866	3	3	198	291
	302	0.244438	4	4	259	262
	301	0.243364	3	3	201	290
	300	0.23862	3	3	12	267
	299	0.235382	3	3	56	289
	298	0.221327	3	3	51	237
	297	0.219282	4	4	41	238
	296	0.213837	2	2	181	187
	295	0.209208	3	3	146	249
	294	0.207829	2	2	196	199
	293	0.207747	2	2	85	178
	292	0.205325	3	3	121	228
	291	0.197913	2	2	193	197
	290	0.195549	2	2	40	200
	289	0.193388	2	2	58	60
	288	0.190283	3	3	96	224
	287	0.187604	5	5	64	272
	286	0.185504	3	3	176	257
	285	0.184882	3	3	182	282
	284	0.181771	4	4	43	253
	283	0.174151	3	3	147	216
	282	0.174126	2	2	185	188
	281	0.169425	4	4	232	250
	280	0.165772	2	2	46	52
	279	0.165623	6	6	119	256
	278	0.163135	2	2	21	27
	277	0.162944	2	2	156	157
	276	0.162698	3	3	22	248
	275	0.160032	3	3	113	226
	274	0.157323	2	2	97	98
	273	0.155648	8	8	247	252
	272	0.147259	4	4	225	255
	271	0.137844	2	2	134	136
	270	0.137335	2	2	18	20
	269	0.128023	3	3	8	243
	268	0.12573	2	2	24	26
	267	0.120715	2	2	15	16
	266	0.120028	2	2	30	31
	265	0.119938	2	2	1	161
	264	0.11725	4	4	240	244
	263	0.115047	2	2	34	35
	262	0.111784	2	2	102	104
	261	0.109801	8	8	219	235
	260	0.109121	2	2	65	79
	259	0.105963	2	2	183	189
	258	0.105548	5	5	168	242
	257	0.104842	2	2	171	184
	256	0.10351	5	5	209	212
	255	0.099412	2	2	66	68
	254	0.0965315	2	2	87	88
	253	0.095123	3	3	67	231
	252	0.0944796	2	2	5	164
	251	0.0809245	2	2	73	90
	250	0.079112	2	2	165	167
	249	0.078368	2	2	135	137
	248	0.0766275	2	2	23	29
	247	0.0759566	6	6	6	245
	246	0.0706335	2	2	33	62
	245	0.0661598	5	5	223	234
	244	0.0661045	2	2	38	39
	243	0.0600085	2	2	7	159
	242	0.0557492	4	4	162	230
	241	0.0554025	2	2	152	154
	240	0.0529765	2	2	72	74
	239	0.0498622	3	3	95	217
	238	0.0494317	3	3	71	218
	237	0.0464775	2	2	49	53
	236	0.046086	2	2	89	100
	235	0.0442487	4	4	139	205
	234	0.0439425	2	2	3	4
	233	0.0423505	2	2	175	186
	232	0.0422205	2	2	158	166
	231	0.041607	2	2	78	93
	230	0.0404075	3	3	163	214
	229	0.040093	3	3	126	210
	228	0.039036	2	2	114	120
	227	0.0366185	2	2	108	109
	226	0.036532	2	2	111	112
	225	0.0333455	2	2	37	70
	224	0.031412	2	2	11	17
	223	0.0313268	3	3	2	211
	222	0.0305313	2	2	123	124
	221	0.0272167	3	3	92	206
	220	0.0264487	2	2	150	151
	219	0.0252322	4	4	127	215
	218	0.024043	2	2	76	91
	217	0.0238856	2	2	63	80
	216	0.0223525	2	2	133	142
	215	0.0158128	3	3	141	208
	214	0.0151425	2	2	169	170
	213	0.014277	2	2	59	82
	212	0.0132205	3	3	125	204
	211	0.0108845	2	2	9	10
	210	0.00452112	2	2	115	138
	209	0.004222	2	2	128	132
	208	0.0041145	2	2	140	145
	207	0.0039505	2	2	61	81
	206	0.002698	2	2	69	77
	205	0.0016505	3	3	129	203
	204	0.0002435	2	2	118	143
	203	0.0001915	2	2	117	130
	202	0	2	2	75	144
	Evolution of indices:
	Number of clusters	2	3	4	5
	Silhouette index	0.755548	0.29777	0.289823	0.31017
	Hartigan index (H)	59.3407	52.8351	27.5017	29.4871
	H(k-1) - H(k)	21.4895	6.50562	25.3333	-1.98536
	Calinski & Harabasz index	80.8302	81.9339	86.5342	80.5069
	Agglomerative hierarchical clustering (AHC) / Number of clusters = 4:
	Inertia decomposition for the optimal classification:
		Absolute	Percent
	Within-cluster	341.602	0.431448
	Between-clusters	450.156	0.568552
	Total inertia	791.757	1
	Cluster centroids:
	Cluster	LoCo	LoAb	LoThx	LoT	LaT	LoAn	LoAA	LaAA	LoAP	LaAP	LoF	LoTi	LaTi	LoM	LaM	DoD	DooD	La1T	La2T	La3T	La4T	LoYc	LaYc	NC	Sum of weights	Within-cluster variance
	1	5.33385	3.0323	1.5179	1.09068	1.5274	1.51828	3.35713	0.849	3.18845	0.981028	1.41457	1.5254	0.551525	0.496325	0.34065	0.343025	0.3162	0.86175	0.7677	0.635825	0.468575	0.760225	0.371	6.925	40	2.48915
	2	5.58508	3.23596	1.53312	1.48204	1.88574	1.98568	4.56438	1.55155	3.32954	0.801141	1.50237	1.87301	0.677844	0.614188	0.350672	0.398945	0.373753	0.971281	0.903914	0.705906	0.566883	1.17739	0.424387	6.59375	128	1.71375
	3	6.343	3.62093	1.62463	2.20344	2.83297	2.9724	4.86763	1.86337	3.3044	0.831167	1.3436	1.71157	0.584433	0.551167	0.255333	0.5345	0.4948	1.04837	1.0229	0.756633	0.547467	1.68657	0.403833	6.33333	30	0.834453
	4	6.23	3.50333	1.57633	3.83667	3.43	3.08667	6.41333	1.68333	4.24	1.52	1.62033	1.952	0.792333	8.44567	0.581	0.476333	0.469667	0.865	0.760333	0.688667	0.521	1.693	0.601	6	3	1.33987
	Distances between the cluster centroids:
		1	2	3	4
	1	0	1.76205	3.35106	9.56237
	2	1.76205	0	1.94156	8.74812
	3	3.35106	1.94156	0	8.34901
	4	9.56237	8.74812	8.34901	0
	Central objects:
	Cluster	LoCo	LoAb	LoThx	LoT	LaT	LoAn	LoAA	LaAA	LoAP	LaAP	LoF	LoTi	LaTi	LoM	LaM	DoD	DooD	La1T	La2T	La3T	La4T	LoYc	LaYc	NC
	1 (Obs139)	5.416	3.227	1.421	1.349	1.652	1.201	3.693	0.952	2.821	0.685	1.674	1.633	0.627	0.525	0.394	0.386	0.378	0.875	0.802	0.647	0.549	0.924	0.46	7
	2 (Obs171)	5.608	3.065	1.512	1.412	1.908	2.145	4.424	1.745	3.324	0.822	1.331	1.886	0.588	0.622	0.323	0.353	0.332	0.901	0.848	0.689	0.625	1.081	0.363	7
	3 (Obs70)	6.25	3.724	1.563	2.115	2.824	3.019	4.942	1.865	3.355	0.83	1.35	1.83	0.58	0.45	0.25	0.572	0.485	0.983	0.882	0.578	0.548	1.675	0.445	6
	4 (Obs107)	6.13	3.38	1.533	3.53	3.41	3.04	6.11	1.58	3.81	1.31	1.41	1.872	0.724	8.179	0.531	0.467	0.448	0.719	0.701	0.629	0.481	1.621	0.564	6
	Distances between the central objects:
		1 (Obs139)	2 (Obs171)	3 (Obs70)	4 (Obs107)
	1 (Obs139)	0	1.64689	3.27619	8.9256
	2 (Obs171)	1.64689	0	2.17381	8.35902
	3 (Obs70)	3.27619	2.17381	0	8.02148
	4 (Obs107)	8.9256	8.35902	8.02148	0
	Results by cluster:
	Cluster	1	2	3	4
	Number of objects by cluster	40	128	30	3
	Sum of weights	40	128	30	3
	Within-cluster variance	2.48915	1.71375	0.834453	1.33987
	Minimum distance to centroid	0.851623	0.592195	0.485867	0.788306
	Average distance to centroid	1.33647	1.22748	0.857374	0.932452
	Maximum distance to centroid	4.53435	2.99915	1.53182	1.14624
		Obs1	Obs11	Obs30	Obs105
		Obs2	Obs12	Obs31	Obs106
		Obs3	Obs13	Obs32	Obs107
		Obs4	Obs14	Obs33
		Obs5	Obs15	Obs34
		Obs6	Obs16	Obs35
		Obs7	Obs17	Obs36
		Obs8	Obs18	Obs37
		Obs9	Obs19	Obs38
		Obs10	Obs20	Obs39
		Obs75	Obs21	Obs56
		Obs116	Obs22	Obs58
		Obs117	Obs23	Obs60
		Obs127	Obs24	Obs62
		Obs129	Obs25	Obs64
		Obs130	Obs26	Obs66
		Obs134	Obs27	Obs68
		Obs135	Obs28	Obs70
		Obs136	Obs29	Obs72
		Obs137	Obs40	Obs74
		Obs139	Obs41	Obs190
		Obs140	Obs42	Obs191
		Obs141	Obs43	Obs192
		Obs144	Obs44	Obs193
		Obs145	Obs45	Obs194
		Obs146	Obs46	Obs195
		Obs152	Obs47	Obs196
		Obs154	Obs48	Obs197
		Obs158	Obs49	Obs198
		Obs159	Obs50	Obs199
		Obs161	Obs51
		Obs162	Obs52
		Obs163	Obs53
		Obs164	Obs54
		Obs165	Obs55
		Obs166	Obs57
		Obs167	Obs59
		Obs168	Obs61
		Obs169	Obs63
		Obs170	Obs65
			Obs67
			Obs69
			Obs71
			Obs73
			Obs76
			Obs77
			Obs78
			Obs79
			Obs80
			Obs81
			Obs82
			Obs83
			Obs84
			Obs85
			Obs86
			Obs87
			Obs88
			Obs89
			Obs90
			Obs91
			Obs92
			Obs93
			Obs94
			Obs95
			Obs96
			Obs97
			Obs98
			Obs99
			Obs100
			Obs101
			Obs102
			Obs103
			Obs104
			Obs108
			Obs109
			Obs110
			Obs111
			Obs112
			Obs113
			Obs114
			Obs115
			Obs118
			Obs119
			Obs120
			Obs121
			Obs122
			Obs123
			Obs124
			Obs125
			Obs126
			Obs128
			Obs131
			Obs132
			Obs133
			Obs138
			Obs142
			Obs143
			Obs147
			Obs148
			Obs149
			Obs150
			Obs151
			Obs153
			Obs155
			Obs156
			Obs157
			Obs160
			Obs171
			Obs172
			Obs173
			Obs174
			Obs175
			Obs176
			Obs177
			Obs178
			Obs179
			Obs180
			Obs181
			Obs182
			Obs183
			Obs184
			Obs185
			Obs186
			Obs187
			Obs188
			Obs189
			Obs200
			Obs201
	Results by object:
	Observation	Cluster	Distance to centroid
	Obs1	1	1.08146
	Obs2	1	0.994269
	Obs3	1	0.995196
	Obs4	1	0.96848
	Obs5	1	1.01151
	Obs6	1	1.01062
	Obs7	1	1.3781
	Obs8	1	1.37443
	Obs9	1	1.03461
	Obs10	1	1.05802
	Obs11	2	0.811871
	Obs12	2	1.16611
	Obs13	2	1.62656
	Obs14	2	2.32499
	Obs15	2	1.08827
	Obs16	2	0.987284
	Obs17	2	0.847497
	Obs18	2	0.973148
	Obs19	2	1.37538
	Obs20	2	1.00951
	Obs21	2	1.43926
	Obs22	2	0.908319
	Obs23	2	0.787024
	Obs24	2	0.808752
	Obs25	2	0.901964
	Obs26	2	1.00075
	Obs27	2	1.18452
	Obs28	2	1.34996
	Obs29	2	0.82172
	Obs30	3	0.92697
	Obs31	3	0.734827
	Obs32	3	1.03855
	Obs33	3	0.744393
	Obs34	3	1.15148
	Obs35	3	1.11251
	Obs36	3	0.708674
	Obs37	3	0.568949
	Obs38	3	0.769144
	Obs39	3	0.585618
	Obs40	2	0.871861
	Obs41	2	1.06332
	Obs42	2	1.68871
	Obs43	2	0.904117
	Obs44	2	1.47256
	Obs45	2	2.02536
	Obs46	2	1.9829
	Obs47	2	1.56672
	Obs48	2	1.43459
	Obs49	2	1.594
	Obs50	2	1.66071
	Obs51	2	1.53658
	Obs52	2	2.13853
	Obs53	2	1.54998
	Obs54	2	2.09262
	Obs55	2	1.78607
	Obs56	3	0.876738
	Obs57	2	1.47512
	Obs58	3	0.668756
	Obs59	2	1.00451
	Obs60	3	0.841979
	Obs61	2	0.648897
	Obs62	3	0.697272
	Obs63	2	1.39457
	Obs64	3	0.626089
	Obs65	2	0.892109
	Obs66	3	0.579064
	Obs67	2	0.809242
	Obs68	3	0.512946
	Obs69	2	0.907796
	Obs70	3	0.485867
	Obs71	2	0.820509
	Obs72	3	0.555516
	Obs73	2	0.973053
	Obs74	3	0.514746
	Obs75	1	1.04517
	Obs76	2	0.814928
	Obs77	2	0.902742
	Obs78	2	0.791429
	Obs79	2	0.833176
	Obs80	2	1.37362
	Obs81	2	0.662081
	Obs82	2	1.03134
	Obs83	2	1.27811
	Obs84	2	1.18216
	Obs85	2	0.73552
	Obs86	2	1.69572
	Obs87	2	1.083
	Obs88	2	1.11878
	Obs89	2	0.774559
	Obs90	2	0.904347
	Obs91	2	0.839323
	Obs92	2	0.909611
	Obs93	2	0.790386
	Obs94	2	1.13991
	Obs95	2	1.4437
	Obs96	2	0.794188
	Obs97	2	1.11384
	Obs98	2	1.02923
	Obs99	2	1.07446
	Obs100	2	0.810806
	Obs101	2	1.52007
	Obs102	2	0.696984
	Obs103	2	1.28343
	Obs104	2	0.779517
	Obs105	4	0.862814
	Obs106	4	1.14624
	Obs107	4	0.788306
	Obs108	2	2.99776
	Obs109	2	2.99915
	Obs110	2	1.28123
	Obs111	2	1.63708
	Obs112	2	1.61216
	Obs113	2	1.76898
	Obs114	2	1.67025
	Obs115	2	1.25535
	Obs116	1	2.07537
	Obs117	1	0.953454
	Obs118	2	1.3237
	Obs119	2	1.35799
	Obs120	2	1.65249
	Obs121	2	1.61786
	Obs122	2	1.28219
	Obs123	2	1.89731
	Obs124	2	1.91691
	Obs125	2	1.37146
	Obs126	2	1.26175
	Obs127	1	1.00416
	Obs128	2	1.44467
	Obs129	1	0.959784
	Obs130	1	0.94353
	Obs131	2	1.566
	Obs132	2	1.49237
	Obs133	2	1.61606
	Obs134	1	4.03792
	Obs135	1	1.65964
	Obs136	1	4.53435
	Obs137	1	1.3294
	Obs138	2	1.25781
	Obs139	1	0.851623
	Obs140	1	1.04829
	Obs141	1	1.12227
	Obs142	2	1.7407
	Obs143	2	1.32229
	Obs144	1	1.04517
	Obs145	1	1.00434
	Obs146	1	1.3999
	Obs147	2	2.04903
	Obs148	2	1.25518
	Obs149	2	1.4632
	Obs150	2	1.2157
	Obs151	2	1.13473
	Obs152	1	2.75034
	Obs153	2	1.42723
	Obs154	1	2.73745
	Obs155	2	1.31041
	Obs156	2	1.07457
	Obs157	2	1.07776
	Obs158	1	0.964316
	Obs159	1	1.34075
	Obs160	2	0.877236
	Obs161	1	1.03326
	Obs162	1	0.925617
	Obs163	1	0.964916
	Obs164	1	0.895759
	Obs165	1	0.892681
	Obs166	1	0.991395
	Obs167	1	1.01094
	Obs168	1	1.0311
	Obs169	1	0.973304
	Obs170	1	1.02598
	Obs171	2	0.592195
	Obs172	2	1.23316
	Obs173	2	1.44982
	Obs174	2	1.78969
	Obs175	2	0.913801
	Obs176	2	0.864668
	Obs177	2	0.74639
	Obs178	2	0.80569
	Obs179	2	1.15935
	Obs180	2	0.885815
	Obs181	2	1.16879
	Obs182	2	0.861992
	Obs183	2	0.777174
	Obs184	2	0.727907
	Obs185	2	0.813716
	Obs186	2	0.884267
	Obs187	2	1.06992
	Obs188	2	0.781519
	Obs189	2	0.747495
	Obs190	3	1.14284
	Obs191	3	1.07033
	Obs192	3	1.53182
	Obs193	3	1.00834
	Obs194	3	1.24543
	Obs195	3	1.41022
	Obs196	3	0.917369
	Obs197	3	0.952938
	Obs198	3	0.944126
	Obs199	3	0.797717
	Obs200	2	0.789186
	Obs201	2	0.711816

## Sheet: XLSTAT_20220714_121239_1_HID
27.1811	228.703	1	0	1.875	228.703	1	66
1.75	228.703	2	0	1	228.703	2	66
1.75	1.97079	3	0	1	0	3	66
1	1.97079	4	0	1	228.703	4	66
1	0	5	0	2.75	228.703
1	1.97079	6	0	2.75	129.836
2.5	1.97079	7	0	2	129.836
2.5	0.708944	8	0	2	0
2	0.708944	9	0	2	129.836
2	0	10	0	3.5	129.836
2	0.708944	11	0	3.5	91.617
3	0.708944	12	0	3	91.617
3	0	13	0	3	0
3	0.708944	14	0	3	91.617
2.5	0.708944	15	0	4	91.617
2.5	1.97079	16	0	4	0
1.75	1.97079	17	0	4	91.617
1.75	228.703	18	0	3.5	91.617
52.6122	228.703	19	0	3.5	129.836
52.6122	129.836	20	0	2.75	129.836
19.0752	129.836	21	0	2.75	228.703
19.0752	42.0339	22	0	1.875	228.703
8.40039	42.0339	23	0	0	0
8.40039	2.71464	24	0	0	0
4.75	2.71464	25	0	0	0
4.75	0.128023	26	0	0	0
4	0.128023	27	0	0	0
4	0	28	0	0	0
4	0.128023	29	0	0	0
5.5	0.128023	30	0	0	0
5.5	0.0600085	31	0	0	0
5	0.0600085	32	0	0	0
5	0	33	0	0	0
5	0.0600085	34	0	0	0
6	0.0600085	35	0	0	0
6	0	36	0	0	0
6	0.0600085	37	0	0	0
5.5	0.0600085	38	0	0	0
5.5	0.128023	39	0	0	0
4.75	0.128023	40	0	0	0
4.75	2.71464	41	0	0	0
12.0508	2.71464	42	0	0	0
12.0508	0.729096	43	0	0	0
8.5	0.729096	44	0	0	0
8.5	0.169425	45	0	0	0
7.5	0.169425	46	0	0	0
7.5	0.0422205	47	0	0	0
7	0.0422205	48	0	0	0
7	0	49	0	0	0
7	0.0422205	50	0	0	0
8	0.0422205	51	0	0	0
8	0	52	0	0	0
8	0.0422205	53	0	0	0
7.5	0.0422205	54	0	0	0
7.5	0.169425	55	0	0	0
9.5	0.169425	56	0	0	0
9.5	0.079112	57	0	0	0
9	0.079112	58	0	0	0
9	0	59	0	0	0
9	0.079112	60	0	0	0
10	0.079112	61	0	0	0
10	0	62	0	0	0
10	0.079112	63	0	0	0
9.5	0.079112	64	0	0	0
9.5	0.169425	65	0	0	0
8.5	0.169425	66	0	0	0
8.5	0.729096	67	0	0	0
15.6016	0.729096	68	0	0	0
15.6016	0.391508	69	0	0	0
11.9375	0.391508	70	0	0	0
11.9375	0.105548	71	0	0	0
11	0.105548	72	0	0	0
11	0	73	0	0	0
11	0.105548	74	0	0	0
12.875	0.105548	75	0	0	0
12.875	0.0557492	76	0	0	0
12	0.0557492	77	0	0	0
12	0	78	0	0	0
12	0.0557492	79	0	0	0
13.75	0.0557492	80	0	0	0
13.75	0.0404075	81	0	0	0
13	0.0404075	82	0	0	0
13	0	83	0	0	0
13	0.0404075	84	0	0	0
14.5	0.0404075	85	0	0	0
14.5	0.0151425	86	0	0	0
14	0.0151425	87	0	0	0
14	0	88	0	0	0
14	0.0151425	89	0	0	0
15	0.0151425	90	0	0	0
15	0	91	0	0	0
15	0.0151425	92	0	0	0
14.5	0.0151425	93	0	0	0
14.5	0.0404075	94	0	0	0
13.75	0.0404075	95	0	0	0
13.75	0.0557492	96	0	0	0
12.875	0.0557492	97	0	0	0
12.875	0.105548	98	0	0	0
11.9375	0.105548	99	0	0	0
11.9375	0.391508	100	0	0	0
19.2656	0.391508	101	0	0	0
19.2656	0.314831	102	0	0	0
16.5	0.314831	103	0	0	0
16.5	0.119938	104	0	0	0
16	0.119938	105	0	0	0
16	0	106	0	0	0
16	0.119938	107	0	0	0
17	0.119938	108	0	0	0
17	0	109	0	0	0
17	0.119938	110	0	0	0
16.5	0.119938	111	0	0	0
16.5	0.314831	112	0	0	0
22.0312	0.314831	113	0	0	0
22.0312	0.155648	114	0	0	0
19.5625	0.155648	115	0	0	0
19.5625	0.0759566	116	0	0	0
18	0.0759566	117	0	0	0
18	0	118	0	0	0
18	0.0759566	119	0	0	0
21.125	0.0759566	120	0	0	0
21.125	0.0661598	121	0	0	0
19.75	0.0661598	122	0	0	0
19.75	0.0313268	123	0	0	0
19	0.0313268	124	0	0	0
19	0	125	0	0	0
19	0.0313268	126	0	0	0
20.5	0.0313268	127	0	0	0
20.5	0.0108845	128	0	0	0
20	0.0108845	129	0	0	0
20	0	130	0	0	0
20	0.0108845	131	0	0	0
21	0.0108845	132	0	0	0
21	0	133	0	0	0
21	0.0108845	134	0	0	0
20.5	0.0108845	135	0	0	0
20.5	0.0313268	136	0	0	0
19.75	0.0313268	137	0	0	0
19.75	0.0661598	138	0	0	0
22.5	0.0661598	139	0	0	0
22.5	0.0439425	140	0	0	0
22	0.0439425	141	0	0	0
22	0	142	0	0	0
22	0.0439425	143	0	0	0
23	0.0439425	144	0	0	0
23	0	145	0	0	0
23	0.0439425	146	0	0	0
22.5	0.0439425	147	0	0	0
22.5	0.0661598	148	0	0	0
21.125	0.0661598	149	0	0	0
21.125	0.0759566	150	0	0	0
19.5625	0.0759566	151	0	0	0
19.5625	0.155648	152	0	0	0
24.5	0.155648	153	0	0	0
24.5	0.0944796	154	0	0	0
24	0.0944796	155	0	0	0
24	0	156	0	0	0
24	0.0944796	157	0	0	0
25	0.0944796	158	0	0	0
25	0	159	0	0	0
25	0.0944796	160	0	0	0
24.5	0.0944796	161	0	0	0
24.5	0.155648	162	0	0	0
22.0312	0.155648	163	0	0	0
22.0312	0.314831	164	0	0	0
19.2656	0.314831	165	0	0	0
19.2656	0.391508	166	0	0	0
15.6016	0.391508	167	0	0	0
15.6016	0.729096	168	0	0	0
12.0508	0.729096	169	0	0	0
12.0508	2.71464	170	0	0	0
8.40039	2.71464	171	0	0	0
8.40039	42.0339	172	0	0	0
29.75	42.0339	173	0	0	0
29.75	29.8445	174	0	0	0
26.5	29.8445	175	0	0	0
26.5	0.137844	176	0	0	0
26	0.137844	177	0	0	0
26	0	178	0	0	0
26	0.137844	179	0	0	0
27	0.137844	180	0	0	0
27	0	181	0	0	0
27	0.137844	182	0	0	0
26.5	0.137844	183	0	0	0
26.5	29.8445	184	0	0	0
33	29.8445	185	0	0	0
33	9.67882	186	0	0	0
29.3125	9.67882	187	0	0	0
29.3125	0.80587	188	0	0	0
28	0.80587	189	0	0	0
28	0	190	0	0	0
28	0.80587	191	0	0	0
30.625	0.80587	192	0	0	0
30.625	0.381609	193	0	0	0
29.5	0.381609	194	0	0	0
29.5	0	195	0	0	0
29	0	196	0	0	0
29	0	197	0	0	0
29	0	198	0	0	0
30	0	199	0	0	0
30	0	200	0	0	0
30	0	201	0	0	0
29.5	0			0	0
29.5	0.381609			0	0
31.75	0.381609			0	0
31.75	0.209208			0	0
31	0.209208			0	0
31	0			0	0
31	0.209208			0	0
32.5	0.209208			0	0
32.5	0.078368			0	0
32	0.078368			0	0
32	0			0	0
32	0.078368			0	0
33	0.078368			0	0
33	0			0	0
33	0.078368			0	0
32.5	0.078368			0	0
32.5	0.209208			0	0
31.75	0.209208			0	0
31.75	0.381609			0	0
30.625	0.381609			0	0
30.625	0.80587			0	0
29.3125	0.80587			0	0
29.3125	9.67882			0	0
36.6875	9.67882			0	0
36.6875	8.20637			0	0
34.5	8.20637			0	0
34.5	0.0554025			0	0
34	0.0554025			0	0
34	0			0	0
34	0.0554025			0	0
35	0.0554025			0	0
35	0			0	0
35	0.0554025			0	0
34.5	0.0554025			0	0
34.5	8.20637			0	0
38.875	8.20637			0	0
38.875	0.109801			0	0
36.875	0.109801			0	0
36.875	0.0252322			0	0
36	0.0252322			0	0
36	0			0	0
36	0.0252322			0	0
37.75	0.0252322			0	0
37.75	0.0158128			0	0
37	0.0158128			0	0
37	0			0	0
37	0.0158128			0	0
38.5	0.0158128			0	0
38.5	0.0041145			0	0
38	0.0041145			0	0
38	0			0	0
38	0.0041145			0	0
39	0.0041145			0	0
39	0			0	0
39	0.0041145			0	0
38.5	0.0041145			0	0
38.5	0.0158128			0	0
37.75	0.0158128			0	0
37.75	0.0252322			0	0
36.875	0.0252322			0	0
36.875	0.109801			0	0
40.875	0.109801			0	0
40.875	0.0442487			0	0
40	0.0442487			0	0
40	0			0	0
40	0.0442487			0	0
41.75	0.0442487			0	0
41.75	0.0016505			0	0
41	0.0016505			0	0
41	0			0	0
41	0.0016505			0	0
42.5	0.0016505			0	0
42.5	0.0001915			0	0
42	0.0001915			0	0
42	0			0	0
42	0.0001915			0	0
43	0.0001915			0	0
43	0			0	0
43	0.0001915			0	0
42.5	0.0001915			0	0
42.5	0.0016505			0	0
41.75	0.0016505			0	0
41.75	0.0442487			0	0
40.875	0.0442487			0	0
40.875	0.109801			0	0
38.875	0.109801			0	0
38.875	8.20637			0	0
36.6875	8.20637			0	0
36.6875	9.67882			0	0
33	9.67882			0	0
33	29.8445			0	0
29.75	29.8445			0	0
29.75	42.0339			0	0
19.0752	42.0339			0	0
19.0752	129.836			0	0
86.1491	129.836			0	0
86.1491	91.617			0	0
59.5391	91.617			0	0
59.5391	7.21869			0	0
52.4844	7.21869			0	0
52.4844	2.18835			0	0
47.6562	2.18835			0	0
47.6562	0.652402			0	0
45.5	0.652402			0	0
45.5	0.11725			0	0
44.5	0.11725			0	0
44.5	0.0529765			0	0
44	0.0529765			0	0
44	0			0	0
44	0.0529765			0	0
45	0.0529765			0	0
45	0			0	0
45	0.0529765			0	0
44.5	0.0529765			0	0
44.5	0.11725			0	0
46.5	0.11725			0	0
46.5	0.0661045			0	0
46	0.0661045			0	0
46	0			0	0
46	0.0661045			0	0
47	0.0661045			0	0
47	0			0	0
47	0.0661045			0	0
46.5	0.0661045			0	0
46.5	0.11725			0	0
45.5	0.11725			0	0
45.5	0.652402			0	0
49.8125	0.652402			0	0
49.8125	0.584673			0	0
48.5	0.584673			0	0
48.5	0.0706335			0	0
48	0.0706335			0	0
48	0			0	0
48	0.0706335			0	0
49	0.0706335			0	0
49	0			0	0
49	0.0706335			0	0
48.5	0.0706335			0	0
48.5	0.584673			0	0
51.125	0.584673			0	0
51.125	0.29326			0	0
50	0.29326			0	0
50	0			0	0
50	0.29326			0	0
52.25	0.29326			0	0
52.25	0.187604			0	0
51	0.187604			0	0
51	0			0	0
51	0.187604			0	0
53.5	0.187604			0	0
53.5	0.147259			0	0
52.5	0.147259			0	0
52.5	0.0333455			0	0
52	0.0333455			0	0
52	0			0	0
52	0.0333455			0	0
53	0.0333455			0	0
53	0			0	0
53	0.0333455			0	0
52.5	0.0333455			0	0
52.5	0.147259			0	0
54.5	0.147259			0	0
54.5	0.099412			0	0
54	0.099412			0	0
54	0			0	0
54	0.099412			0	0
55	0.099412			0	0
55	0			0	0
55	0.099412			0	0
54.5	0.099412			0	0
54.5	0.147259			0	0
53.5	0.147259			0	0
53.5	0.187604			0	0
52.25	0.187604			0	0
52.25	0.29326			0	0
51.125	0.29326			0	0
51.125	0.584673			0	0
49.8125	0.584673			0	0
49.8125	0.652402			0	0
47.6562	0.652402			0	0
47.6562	2.18835			0	0
57.3125	2.18835			0	0
57.3125	0.684305			0	0
56	0.684305			0	0
56	0			0	0
56	0.684305			0	0
58.625	0.684305			0	0
58.625	0.389613			0	0
57.5	0.389613			0	0
57.5	0.120028			0	0
57	0.120028			0	0
57	0			0	0
57	0.120028			0	0
58	0.120028			0	0
58	0			0	0
58	0.120028			0	0
57.5	0.120028			0	0
57.5	0.389613			0	0
59.75	0.389613			0	0
59.75	0.235382			0	0
59	0.235382			0	0
59	0			0	0
59	0.235382			0	0
60.5	0.235382			0	0
60.5	0.193388			0	0
60	0.193388			0	0
60	0			0	0
60	0.193388			0	0
61	0.193388			0	0
61	0			0	0
61	0.193388			0	0
60.5	0.193388			0	0
60.5	0.235382			0	0
59.75	0.235382			0	0
59.75	0.389613			0	0
58.625	0.389613			0	0
58.625	0.684305			0	0
57.3125	0.684305			0	0
57.3125	2.18835			0	0
52.4844	2.18835			0	0
52.4844	7.21869			0	0
66.5938	7.21869			0	0
66.5938	4.63862			0	0
63.5	4.63862			0	0
63.5	1.42975			0	0
62.5	1.42975			0	0
62.5	0.115047			0	0
62	0.115047			0	0
62	0			0	0
62	0.115047			0	0
63	0.115047			0	0
63	0			0	0
63	0.115047			0	0
62.5	0.115047			0	0
62.5	1.42975			0	0
64.5	1.42975			0	0
64.5	0.39247			0	0
64	0.39247			0	0
64	0			0	0
64	0.39247			0	0
65	0.39247			0	0
65	0			0	0
65	0.39247			0	0
64.5	0.39247			0	0
64.5	1.42975			0	0
63.5	1.42975			0	0
63.5	4.63862			0	0
69.6875	4.63862			0	0
69.6875	1.54294			0	0
67.625	1.54294			0	0
67.625	0.740128			0	0
66.5	0.740128			0	0
66.5	0.207829			0	0
66	0.207829			0	0
66	0			0	0
66	0.207829			0	0
67	0.207829			0	0
67	0			0	0
67	0.207829			0	0
66.5	0.207829			0	0
66.5	0.740128			0	0
68.75	0.740128			0	0
68.75	0.249866			0	0
68	0.249866			0	0
68	0			0	0
68	0.249866			0	0
69.5	0.249866			0	0
69.5	0.197913			0	0
69	0.197913			0	0
69	0			0	0
69	0.197913			0	0
70	0.197913			0	0
70	0			0	0
70	0.197913			0	0
69.5	0.197913			0	0
69.5	0.249866			0	0
68.75	0.249866			0	0
68.75	0.740128			0	0
67.625	0.740128			0	0
67.625	1.54294			0	0
71.75	1.54294			0	0
71.75	0.912592			0	0
71	0.912592			0	0
71	0			0	0
71	0.912592			0	0
72.5	0.912592			0	0
72.5	0.437319			0	0
72	0.437319			0	0
72	0			0	0
72	0.437319			0	0
73	0.437319			0	0
73	0			0	0
73	0.437319			0	0
72.5	0.437319			0	0
72.5	0.912592			0	0
71.75	0.912592			0	0
71.75	1.54294			0	0
69.6875	1.54294			0	0
69.6875	4.63862			0	0
66.5938	4.63862			0	0
66.5938	7.21869			0	0
59.5391	7.21869			0	0
59.5391	91.617			0	0
112.759	91.617			0	0
112.759	39.3492			0	0
83.0879	39.3492			0	0
83.0879	2.75473			0	0
76.0508	2.75473			0	0
76.0508	1.38845			0	0
74	1.38845			0	0
74	0			0	0
74	1.38845			0	0
78.1016	1.38845			0	0
78.1016	0.728293			0	0
75.75	0.728293			0	0
75.75	0.040093			0	0
75	0.040093			0	0
75	0			0	0
75	0.040093			0	0
76.5	0.040093			0	0
76.5	0.00452112			0	0
76	0.00452112			0	0
76	0			0	0
76	0.00452112			0	0
77	0.00452112			0	0
77	0			0	0
77	0.00452112			0	0
76.5	0.00452112			0	0
76.5	0.040093			0	0
75.75	0.040093			0	0
75.75	0.728293			0	0
80.4531	0.728293			0	0
80.4531	0.665346			0	0
78.75	0.665346			0	0
78.75	0.160032			0	0
78	0.160032			0	0
78	0			0	0
78	0.160032			0	0
79.5	0.160032			0	0
79.5	0.036532			0	0
79	0.036532			0	0
79	0			0	0
79	0.036532			0	0
80	0.036532			0	0
80	0			0	0
80	0.036532			0	0
79.5	0.036532			0	0
79.5	0.160032			0	0
78.75	0.160032			0	0
78.75	0.665346			0	0
82.1562	0.665346			0	0
82.1562	0.561789			0	0
81	0.561789			0	0
81	0			0	0
81	0.561789			0	0
83.3125	0.561789			0	0
83.3125	0.165623			0	0
82	0.165623			0	0
82	0			0	0
82	0.165623			0	0
84.625	0.165623			0	0
84.625	0.10351			0	0
83.5	0.10351			0	0
83.5	0.004222			0	0
83	0.004222			0	0
83	0			0	0
83	0.004222			0	0
84	0.004222			0	0
84	0			0	0
84	0.004222			0	0
83.5	0.004222			0	0
83.5	0.10351			0	0
85.75	0.10351			0	0
85.75	0.0132205			0	0
85	0.0132205			0	0
85	0			0	0
85	0.0132205			0	0
86.5	0.0132205			0	0
86.5	0.0002435			0	0
86	0.0002435			0	0
86	0			0	0
86	0.0002435			0	0
87	0.0002435			0	0
87	0			0	0
87	0.0002435			0	0
86.5	0.0002435			0	0
86.5	0.0132205			0	0
85.75	0.0132205			0	0
85.75	0.10351			0	0
84.625	0.10351			0	0
84.625	0.165623			0	0
83.3125	0.165623			0	0
83.3125	0.561789			0	0
82.1562	0.561789			0	0
82.1562	0.665346			0	0
80.4531	0.665346			0	0
80.4531	0.728293			0	0
78.1016	0.728293			0	0
78.1016	1.38845			0	0
76.0508	1.38845			0	0
76.0508	2.75473			0	0
90.125	2.75473			0	0
90.125	1.41703			0	0
88.75	1.41703			0	0
88.75	0.174151			0	0
88	0.174151			0	0
88	0			0	0
88	0.174151			0	0
89.5	0.174151			0	0
89.5	0.0223525			0	0
89	0.0223525			0	0
89	0			0	0
89	0.0223525			0	0
90	0.0223525			0	0
90	0			0	0
90	0.0223525			0	0
89.5	0.0223525			0	0
89.5	0.174151			0	0
88.75	0.174151			0	0
88.75	1.41703			0	0
91.5	1.41703			0	0
91.5	0.457495			0	0
91	0.457495			0	0
91	0			0	0
91	0.457495			0	0
92	0.457495			0	0
92	0			0	0
92	0.457495			0	0
91.5	0.457495			0	0
91.5	1.41703			0	0
90.125	1.41703			0	0
90.125	2.75473			0	0
83.0879	2.75473			0	0
83.0879	39.3492			0	0
142.43	39.3492			0	0
142.43	31.827			0	0
107.34	31.827			0	0
107.34	14.3363			0	0
96.2812	14.3363			0	0
96.2812	4.23622			0	0
93.75	4.23622			0	0
93.75	0.419401			0	0
93	0.419401			0	0
93	0			0	0
93	0.419401			0	0
94.5	0.419401			0	0
94.5	0.165772			0	0
94	0.165772			0	0
94	0			0	0
94	0.165772			0	0
95	0.165772			0	0
95	0			0	0
95	0.165772			0	0
94.5	0.165772			0	0
94.5	0.419401			0	0
93.75	0.419401			0	0
93.75	4.23622			0	0
98.8125	4.23622			0	0
98.8125	2.67475			0	0
96.875	2.67475			0	0
96.875	0.678826			0	0
96	0.678826			0	0
96	0			0	0
96	0.678826			0	0
97.75	0.678826			0	0
97.75	0.221327			0	0
97	0.221327			0	0
97	0			0	0
97	0.221327			0	0
98.5	0.221327			0	0
98.5	0.0464775			0	0
98	0.0464775			0	0
98	0			0	0
98	0.0464775			0	0
99	0.0464775			0	0
99	0			0	0
99	0.0464775			0	0
98.5	0.0464775			0	0
98.5	0.221327			0	0
97.75	0.221327			0	0
97.75	0.678826			0	0
96.875	0.678826			0	0
96.875	2.67475			0	0
100.75	2.67475			0	0
100.75	1.1625			0	0
100	1.1625			0	0
100	0			0	0
100	1.1625			0	0
101.5	1.1625			0	0
101.5	0.452539			0	0
101	0.452539			0	0
101	0			0	0
101	0.452539			0	0
102	0.452539			0	0
102	0			0	0
102	0.452539			0	0
101.5	0.452539			0	0
101.5	1.1625			0	0
100.75	1.1625			0	0
100.75	2.67475			0	0
98.8125	2.67475			0	0
98.8125	4.23622			0	0
96.2812	4.23622			0	0
96.2812	14.3363			0	0
118.399	14.3363			0	0
118.399	10.2901			0	0
105.312	10.2901			0	0
105.312	3.48068			0	0
103.5	3.48068			0	0
103.5	0.503189			0	0
103	0.503189			0	0
103	0			0	0
103	0.503189			0	0
104	0.503189			0	0
104	0			0	0
104	0.503189			0	0
103.5	0.503189			0	0
103.5	3.48068			0	0
107.125	3.48068			0	0
107.125	1.87272			0	0
105.75	1.87272			0	0
105.75	1.08067			0	0
105	1.08067			0	0
105	0			0	0
105	1.08067			0	0
106.5	1.08067			0	0
106.5	0.817806			0	0
106	0.817806			0	0
106	0			0	0
106	0.817806			0	0
107	0.817806			0	0
107	0			0	0
107	0.817806			0	0
106.5	0.817806			0	0
106.5	1.08067			0	0
105.75	1.08067			0	0
105.75	1.87272			0	0
108.5	1.87272			0	0
108.5	1.22915			0	0
108	1.22915			0	0
108	0			0	0
108	1.22915			0	0
109	1.22915			0	0
109	0			0	0
109	1.22915			0	0
108.5	1.22915			0	0
108.5	1.87272			0	0
107.125	1.87272			0	0
107.125	3.48068			0	0
105.312	3.48068			0	0
105.312	10.2901			0	0
131.486	10.2901			0	0
131.486	7.94042			0	0
120.879	7.94042			0	0
120.879	3.04553			0	0
112.859	3.04553			0	0
112.859	2.31285			0	0
110.5	2.31285			0	0
110.5	0.163135			0	0
110	0.163135			0	0
110	0			0	0
110	0.163135			0	0
111	0.163135			0	0
111	0			0	0
111	0.163135			0	0
110.5	0.163135			0	0
110.5	2.31285			0	0
115.219	2.31285			0	0
115.219	1.0148			0	0
112.75	1.0148			0	0
112.75	0.323492			0	0
112	0.323492			0	0
112	0			0	0
112	0.323492			0	0
113.5	0.323492			0	0
113.5	0.157323			0	0
113	0.157323			0	0
113	0			0	0
113	0.157323			0	0
114	0.157323			0	0
114	0			0	0
114	0.157323			0	0
113.5	0.157323			0	0
113.5	0.323492			0	0
112.75	0.323492			0	0
112.75	1.0148			0	0
117.688	1.0148			0	0
117.688	0.858492			0	0
115.75	0.858492			0	0
115.75	0.23862			0	0
115	0.23862			0	0
115	0			0	0
115	0.23862			0	0
116.5	0.23862			0	0
116.5	0.120715			0	0
116	0.120715			0	0
116	0			0	0
116	0.120715			0	0
117	0.120715			0	0
117	0			0	0
117	0.120715			0	0
116.5	0.120715			0	0
116.5	0.23862			0	0
115.75	0.23862			0	0
115.75	0.858492			0	0
119.625	0.858492			0	0
119.625	0.343899			0	0
118.5	0.343899			0	0
118.5	0.046086			0	0
118	0.046086			0	0
118	0			0	0
118	0.046086			0	0
119	0.046086			0	0
119	0			0	0
119	0.046086			0	0
118.5	0.046086			0	0
118.5	0.343899			0	0
120.75	0.343899			0	0
120.75	0.190283			0	0
120	0.190283			0	0
120	0			0	0
120	0.190283			0	0
121.5	0.190283			0	0
121.5	0.031412			0	0
121	0.031412			0	0
121	0			0	0
121	0.031412			0	0
122	0.031412			0	0
122	0			0	0
122	0.031412			0	0
121.5	0.031412			0	0
121.5	0.190283			0	0
120.75	0.190283			0	0
120.75	0.343899			0	0
119.625	0.343899			0	0
119.625	0.858492			0	0
117.688	0.858492			0	0
117.688	1.0148			0	0
115.219	1.0148			0	0
115.219	2.31285			0	0
112.859	2.31285			0	0
112.859	3.04553			0	0
128.898	3.04553			0	0
128.898	2.68918			0	0
124.5	2.68918			0	0
124.5	0.856913			0	0
123.5	0.856913			0	0
123.5	0.014277			0	0
123	0.014277			0	0
123	0			0	0
123	0.014277			0	0
124	0.014277			0	0
124	0			0	0
124	0.014277			0	0
123.5	0.014277			0	0
123.5	0.856913			0	0
125.5	0.856913			0	0
125.5	0.0264487			0	0
125	0.0264487			0	0
125	0			0	0
125	0.0264487			0	0
126	0.0264487			0	0
126	0			0	0
126	0.0264487			0	0
125.5	0.0264487			0	0
125.5	0.856913			0	0
124.5	0.856913			0	0
124.5	2.68918			0	0
133.297	2.68918			0	0
133.297	1.48282			0	0
129.719	1.48282			0	0
129.719	0.702194			0	0
127.75	0.702194			0	0
127.75	0.0272167			0	0
127	0.0272167			0	0
127	0			0	0
127	0.0272167			0	0
128.5	0.0272167			0	0
128.5	0.002698			0	0
128	0.002698			0	0
128	0			0	0
128	0.002698			0	0
129	0.002698			0	0
129	0			0	0
129	0.002698			0	0
128.5	0.002698			0	0
128.5	0.0272167			0	0
127.75	0.0272167			0	0
127.75	0.702194			0	0
131.688	0.702194			0	0
131.688	0.37092			0	0
130.5	0.37092			0	0
130.5	0.109121			0	0
130	0.109121			0	0
130	0			0	0
130	0.109121			0	0
131	0.109121			0	0
131	0			0	0
131	0.109121			0	0
130.5	0.109121			0	0
130.5	0.37092			0	0
132.875	0.37092			0	0
132.875	0.181771			0	0
132	0.181771			0	0
132	0			0	0
132	0.181771			0	0
133.75	0.181771			0	0
133.75	0.095123			0	0
133	0.095123			0	0
133	0			0	0
133	0.095123			0	0
134.5	0.095123			0	0
134.5	0.041607			0	0
134	0.041607			0	0
134	0			0	0
134	0.041607			0	0
135	0.041607			0	0
135	0			0	0
135	0.041607			0	0
134.5	0.041607			0	0
134.5	0.095123			0	0
133.75	0.095123			0	0
133.75	0.181771			0	0
132.875	0.181771			0	0
132.875	0.37092			0	0
131.688	0.37092			0	0
131.688	0.702194			0	0
129.719	0.702194			0	0
129.719	1.48282			0	0
136.875	1.48282			0	0
136.875	1.1734			0	0
136	1.1734			0	0
136	0			0	0
136	1.1734			0	0
137.75	1.1734			0	0
137.75	0.422369			0	0
137	0.422369			0	0
137	0			0	0
137	0.422369			0	0
138.5	0.422369			0	0
138.5	0.137335			0	0
138	0.137335			0	0
138	0			0	0
138	0.137335			0	0
139	0.137335			0	0
139	0			0	0
139	0.137335			0	0
138.5	0.137335			0	0
138.5	0.422369			0	0
137.75	0.422369			0	0
137.75	1.1734			0	0
136.875	1.1734			0	0
136.875	1.48282			0	0
133.297	1.48282			0	0
133.297	2.68918			0	0
128.898	2.68918			0	0
128.898	3.04553			0	0
120.879	3.04553			0	0
120.879	7.94042			0	0
142.094	7.94042			0	0
142.094	3.53978			0	0
140.5	3.53978			0	0
140.5	0.90657			0	0
140	0.90657			0	0
140	0			0	0
140	0.90657			0	0
141	0.90657			0	0
141	0			0	0
141	0.90657			0	0
140.5	0.90657			0	0
140.5	3.53978			0	0
143.688	3.53978			0	0
143.688	0.962007			0	0
142.5	0.962007			0	0
142.5	0.0965315			0	0
142	0.0965315			0	0
142	0			0	0
142	0.0965315			0	0
143	0.0965315			0	0
143	0			0	0
143	0.0965315			0	0
142.5	0.0965315			0	0
142.5	0.962007			0	0
144.875	0.962007			0	0
144.875	0.282147			0	0
144	0.282147			0	0
144	0			0	0
144	0.282147			0	0
145.75	0.282147			0	0
145.75	0.0498622			0	0
145	0.0498622			0	0
145	0			0	0
145	0.0498622			0	0
146.5	0.0498622			0	0
146.5	0.0238856			0	0
146	0.0238856			0	0
146	0			0	0
146	0.0238856			0	0
147	0.0238856			0	0
147	0			0	0
147	0.0238856			0	0
146.5	0.0238856			0	0
146.5	0.0498622			0	0
145.75	0.0498622			0	0
145.75	0.282147			0	0
144.875	0.282147			0	0
144.875	0.962007			0	0
143.688	0.962007			0	0
143.688	3.53978			0	0
142.094	3.53978			0	0
142.094	7.94042			0	0
131.486	7.94042			0	0
131.486	10.2901			0	0
118.399	10.2901			0	0
118.399	14.3363			0	0
107.34	14.3363			0	0
107.34	31.827			0	0
177.521	31.827			0	0
177.521	16.4372			0	0
163.346	16.4372			0	0
163.346	4.62622			0	0
155.359	4.62622			0	0
155.359	1.5601			0	0
149.688	1.5601			0	0
149.688	0.629517			0	0
148.5	0.629517			0	0
148.5	0.0809245			0	0
148	0.0809245			0	0
148	0			0	0
148	0.0809245			0	0
149	0.0809245			0	0
149	0			0	0
149	0.0809245			0	0
148.5	0.0809245			0	0
148.5	0.629517			0	0
150.875	0.629517			0	0
150.875	0.349656			0	0
150	0.349656			0	0
150	0			0	0
150	0.349656			0	0
151.75	0.349656			0	0
151.75	0.243364			0	0
151	0.243364			0	0
151	0			0	0
151	0.243364			0	0
152.5	0.243364			0	0
152.5	0.195549			0	0
152	0.195549			0	0
152	0			0	0
152	0.195549			0	0
153	0.195549			0	0
153	0			0	0
153	0.195549			0	0
152.5	0.195549			0	0
152.5	0.243364			0	0
151.75	0.243364			0	0
151.75	0.349656			0	0
150.875	0.349656			0	0
150.875	0.629517			0	0
149.688	0.629517			0	0
149.688	1.5601			0	0
161.031	1.5601			0	0
161.031	1.03203			0	0
157.188	1.03203			0	0
157.188	0.888785			0	0
154.75	0.888785			0	0
154.75	0.383775			0	0
154	0.383775			0	0
154	0			0	0
154	0.383775			0	0
155.5	0.383775			0	0
155.5	0.207747			0	0
155	0.207747			0	0
155	0			0	0
155	0.207747			0	0
156	0.207747			0	0
156	0			0	0
156	0.207747			0	0
155.5	0.207747			0	0
155.5	0.383775			0	0
154.75	0.383775			0	0
154.75	0.888785			0	0
159.625	0.888785			0	0
159.625	0.443749			0	0
157.75	0.443749			0	0
157.75	0.184882			0	0
157	0.184882			0	0
157	0			0	0
157	0.184882			0	0
158.5	0.184882			0	0
158.5	0.174126			0	0
158	0.174126			0	0
158	0			0	0
158	0.174126			0	0
159	0.174126			0	0
159	0			0	0
159	0.174126			0	0
158.5	0.174126			0	0
158.5	0.184882			0	0
157.75	0.184882			0	0
157.75	0.443749			0	0
161.5	0.443749			0	0
161.5	0.244438			0	0
160.5	0.244438			0	0
160.5	0.105963			0	0
160	0.105963			0	0
160	0			0	0
160	0.105963			0	0
161	0.105963			0	0
161	0			0	0
161	0.105963			0	0
160.5	0.105963			0	0
160.5	0.244438			0	0
162.5	0.244438			0	0
162.5	0.111784			0	0
162	0.111784			0	0
162	0			0	0
162	0.111784			0	0
163	0.111784			0	0
163	0			0	0
163	0.111784			0	0
162.5	0.111784			0	0
162.5	0.244438			0	0
161.5	0.244438			0	0
161.5	0.443749			0	0
159.625	0.443749			0	0
159.625	0.888785			0	0
157.188	0.888785			0	0
157.188	1.03203			0	0
164.875	1.03203			0	0
164.875	0.897217			0	0
164	0.897217			0	0
164	0			0	0
164	0.897217			0	0
165.75	0.897217			0	0
165.75	0.162698			0	0
165	0.162698			0	0
165	0			0	0
165	0.162698			0	0
166.5	0.162698			0	0
166.5	0.0766275			0	0
166	0.0766275			0	0
166	0			0	0
166	0.0766275			0	0
167	0.0766275			0	0
167	0			0	0
167	0.0766275			0	0
166.5	0.0766275			0	0
166.5	0.162698			0	0
165.75	0.162698			0	0
165.75	0.897217			0	0
164.875	0.897217			0	0
164.875	1.03203			0	0
161.031	1.03203			0	0
161.031	1.5601			0	0
155.359	1.5601			0	0
155.359	4.62622			0	0
171.332	4.62622			0	0
171.332	3.90391			0	0
168	3.90391			0	0
168	0			0	0
168	3.90391			0	0
174.664	3.90391			0	0
174.664	2.6448			0	0
169.75	2.6448			0	0
169.75	1.53871			0	0
169	1.53871			0	0
169	0			0	0
169	1.53871			0	0
170.5	1.53871			0	0
170.5	0.712632			0	0
170	0.712632			0	0
170	0			0	0
170	0.712632			0	0
171	0.712632			0	0
171	0			0	0
171	0.712632			0	0
170.5	0.712632			0	0
170.5	1.53871			0	0
169.75	1.53871			0	0
169.75	2.6448			0	0
179.578	2.6448			0	0
179.578	2.0507			0	0
175.094	2.0507			0	0
175.094	0.855605			0	0
172.875	0.855605			0	0
172.875	0.219282			0	0
172	0.219282			0	0
172	0			0	0
172	0.219282			0	0
173.75	0.219282			0	0
173.75	0.0494317			0	0
173	0.0494317			0	0
173	0			0	0
173	0.0494317			0	0
174.5	0.0494317			0	0
174.5	0.024043			0	0
174	0.024043			0	0
174	0			0	0
174	0.024043			0	0
175	0.024043			0	0
175	0			0	0
175	0.024043			0	0
174.5	0.024043			0	0
174.5	0.0494317			0	0
173.75	0.0494317			0	0
173.75	0.219282			0	0
172.875	0.219282			0	0
172.875	0.855605			0	0
177.312	0.855605			0	0
177.312	0.784503			0	0
176	0.784503			0	0
176	0			0	0
176	0.784503			0	0
178.625	0.784503			0	0
178.625	0.374654			0	0
177.5	0.374654			0	0
177.5	0.0039505			0	0
177	0.0039505			0	0
177	0			0	0
177	0.0039505			0	0
178	0.0039505			0	0
178	0			0	0
178	0.0039505			0	0
177.5	0.0039505			0	0
177.5	0.374654			0	0
179.75	0.374654			0	0
179.75	0.185504			0	0
179	0.185504			0	0
179	0			0	0
179	0.185504			0	0
180.5	0.185504			0	0
180.5	0.104842			0	0
180	0.104842			0	0
180	0			0	0
180	0.104842			0	0
181	0.104842			0	0
181	0			0	0
181	0.104842			0	0
180.5	0.104842			0	0
180.5	0.185504			0	0
179.75	0.185504			0	0
179.75	0.374654			0	0
178.625	0.374654			0	0
178.625	0.784503			0	0
177.312	0.784503			0	0
177.312	0.855605			0	0
175.094	0.855605			0	0
175.094	2.0507			0	0
184.062	2.0507			0	0
184.062	1.32971			0	0
182.5	1.32971			0	0
182.5	0.213837			0	0
182	0.213837			0	0
182	0			0	0
182	0.213837			0	0
183	0.213837			0	0
183	0			0	0
183	0.213837			0	0
182.5	0.213837			0	0
182.5	1.32971			0	0
185.625	1.32971			0	0
185.625	0.40215			0	0
184.5	0.40215			0	0
184.5	0.0423505			0	0
184	0.0423505			0	0
184	0			0	0
184	0.0423505			0	0
185	0.0423505			0	0
185	0			0	0
185	0.0423505			0	0
184.5	0.0423505			0	0
184.5	0.40215			0	0
186.75	0.40215			0	0
186.75	0.271676			0	0
186	0.271676			0	0
186	0			0	0
186	0.271676			0	0
187.5	0.271676			0	0
187.5	0.12573			0	0
187	0.12573			0	0
187	0			0	0
187	0.12573			0	0
188	0.12573			0	0
188	0			0	0
188	0.12573			0	0
187.5	0.12573			0	0
187.5	0.271676			0	0
186.75	0.271676			0	0
186.75	0.40215			0	0
185.625	0.40215			0	0
185.625	1.32971			0	0
184.062	1.32971			0	0
184.062	2.0507			0	0
179.578	2.0507			0	0
179.578	2.6448			0	0
174.664	2.6448			0	0
174.664	3.90391			0	0
171.332	3.90391			0	0
171.332	4.62622			0	0
163.346	4.62622			0	0
163.346	16.4372			0	0
191.695	16.4372			0	0
191.695	9.71993			0	0
189.5	9.71993			0	0
189.5	0.0366185			0	0
189	0.0366185			0	0
189	0			0	0
189	0.0366185			0	0
190	0.0366185			0	0
190	0			0	0
190	0.0366185			0	0
189.5	0.0366185			0	0
189.5	9.71993			0	0
193.891	9.71993			0	0
193.891	3.86737			0	0
191.75	3.86737			0	0
191.75	0.205325			0	0
191	0.205325			0	0
191	0			0	0
191	0.205325			0	0
192.5	0.205325			0	0
192.5	0.039036			0	0
192	0.039036			0	0
192	0			0	0
192	0.039036			0	0
193	0.039036			0	0
193	0			0	0
193	0.039036			0	0
192.5	0.039036			0	0
192.5	0.205325			0	0
191.75	0.205325			0	0
191.75	3.86737			0	0
196.031	3.86737			0	0
196.031	1.80038			0	0
194.5	1.80038			0	0
194.5	0.0305313			0	0
194	0.0305313			0	0
194	0			0	0
194	0.0305313			0	0
195	0.0305313			0	0
195	0			0	0
195	0.0305313			0	0
194.5	0.0305313			0	0
194.5	1.80038			0	0
197.562	1.80038			0	0
197.562	0.999445			0	0
196	0.999445			0	0
196	0			0	0
196	0.999445			0	0
199.125	0.999445			0	0
199.125	0.746619			0	0
197.75	0.746619			0	0
197.75	0.273684			0	0
197	0.273684			0	0
197	0			0	0
197	0.273684			0	0
198.5	0.273684			0	0
198.5	0.162944			0	0
198	0.162944			0	0
198	0			0	0
198	0.162944			0	0
199	0.162944			0	0
199	0			0	0
199	0.162944			0	0
198.5	0.162944			0	0
198.5	0.273684			0	0
197.75	0.273684			0	0
197.75	0.746619			0	0
200.5	0.746619			0	0
200.5	0.366227			0	0
200	0.366227			0	0
200	0			0	0
200	0.366227			0	0
201	0.366227			0	0
201	0			0	0
201	0.366227			0	0
200.5	0.366227			0	0
200.5	0.746619			0	0
199.125	0.746619			0	0
199.125	0.999445			0	0
197.562	0.999445			0	0
197.562	1.80038			0	0
196.031	1.80038			0	0
196.031	3.86737			0	0
193.891	3.86737			0	0
193.891	9.71993			0	0
191.695	9.71993			0	0
191.695	16.4372			0	0
177.521	16.4372			0	0
177.521	31.827			0	0
142.43	31.827			0	0
142.43	39.3492			0	0
112.759	39.3492			0	0
112.759	91.617			0	0
86.1491	91.617			0	0
86.1491	129.836			0	0
52.6122	129.836			0	0
52.6122	228.703			0	0
27.1811	228.703			0	0
0	0			0	0
0	0			0	0
0	0			0	0
0	0			0	0
0	0			0	0
0	0			0	0
0	0			0	0
0	0			0	0
0	0			0	0
0	0			0	0
0	0			0	0
0	0			0	0
0	0			0	0
0	0			0	0
0	0			0	0
0	0			0	0
0	0			0	0
0	0			0	0
0	0			0	0
0	0			0	0
0	0			0	0
0	0			0	0
0	0			0	0
0	0			0	0
0	0			0	0
0	0			0	0
0	0			0	0
0	0			0	0
0	0			0	0
0	0			0	0
0	0			0	0
0	0			0	0
0	0			0	0
0	0			0	0
0	0			0	0
0	0			0	0
0	0			0	0
0	0			0	0
0	0			0	0
0	0			0	0
0	0			0	0
0	0			0	0
0	0			0	0
0	0			0	0
0	0			0	0
0	0			0	0
0	0			0	0
0	0			0	0
0	0			0	0
0	0			0	0
0	0			0	0
0	0			0	0
0	0			0	0
0	0			0	0
0	0			0	0
0	0			0	0
0	0			0	0
0	0			0	0
0	0			0	0
0	0			0	0
0	0			0	0
0	0			0	0
0	0			0	0
0	0			0	0
0	0			0	0
0	0			0	0
0	0			0	0
0	0			0	0
0	0			0	0
0	0			0	0
0	0			0	0
0	0			0	0
0	0			0	0
0	0			0	0
0	0			0	0
0	0			0	0
0	0			0	0
0	0			0	0
0	0			0	0
0	0			0	0
0	0			0	0
0	0			0	0
0	0			0	0
0	0			0	0
0	0			0	0
0	0			0	0
0	0			0	0
0	0			0	0
0	0			0	0
0	0			0	0
0	0			0	0
0	0			0	0
0	0			0	0
0	0			0	0
0	0			0	0
0	0			0	0
0	0			0	0
0	0			0	0
0	0			0	0
0	0			0	0
0	0			0	0
0	0			0	0
0	0			0	0
0	0			0	0
0	0			0	0
0	0			0	0
0	0			0	0
0	0			0	0
0	0			0	0
0	0			0	0
0	0			0	0
0	0			0	0
0	0			0	0
0	0			0	0
0	0			0	0
0	0			0	0
0	0			0	0
0	0			0	0
0	0			0	0
0	0			0	0
0	0			0	0
0	0			0	0
0	0			0	0
0	0			0	0
0	0			0	0
0	0			0	0
0	0			0	0
0	0			0	0
0	0			0	0
0	0			0	0
0	0			0	0
0	0			0	0
0	0			0	0
0	0			0	0
0	0			0	0
0	0			0	0
0	0			0	0
0	0			0	0
0	0			0	0
0	0			0	0
0	0			0	0
0	0			0	0
0	0			0	0
0	0			0	0
0	0			0	0
0	0			0	0
0	0			0	0
0	0			0	0
0	0			0	0
0	0			0	0
0	0			0	0
0	0			0	0
0	0			0	0
0	0			0	0
0	0			0	0
0	0			0	0
0	0			0	0
0	0			0	0
0	0			0	0
0	0			0	0
0	0			0	0
0	0			0	0
0	0			0	0
0	0			0	0
0	0			0	0
0	0			0	0
0	0			0	0
0	0			0	0
0	0			0	0
0	0			0	0
0	0			0	0
0	0			0	0
0	0			0	0
0	0			0	0
0	0			0	0
0	0			0	0
0	0			0	0
0	0			0	0
0	0			0	0
0	0			0	0
0	0			0	0
0	0			0	0
0	0			0	0
0	0			0	0
0	0			0	0
0	0			0	0
0	0			0	0
0	0			0	0
0	0			0	0
0	0			0	0
0	0			0	0
0	0			0	0
0	0			0	0
0	0			0	0
0	0			0	0
0	0			0	0
0	0			0	0
0	0			0	0
0	0			0	0
0	0			0	0
0	0			0	0
0	0			0	0
0	0			0	0
0	0			0	0
0	0			0	0
0	0			0	0
0	0			0	0

## Sheet: DA
	You are using the XLSTAT trial version. Number of days remaining until the trial expires: 14
	XLSTAT 2022.3.1.1330 - Discriminant Analysis (DA) - Start time: 07/14/2022 at 12:10:59 / End time: 07/14/2022 at 12:11:16 / Microsoft Excel 16.015225
	Y / Qualitative: Workbook = Results morphobiometry.xlsx / Sheet = Dactylurina / Range = Dactylurina!$A$1:$A$202 / 201 rows and 1 column
	X / Quantitative: Workbook = Results morphobiometry.xlsx / Sheet = Dactylurina / Range = Dactylurina!$B$1:$Y$202 / 201 rows and 24 columns
	Within-class covariance matrices are assumed to be equal
	Prior probabilities are taken into account
	Significance level (%): 5
	Summary statistics (Quantitative data):
	Variable	Observations	Obs. with missing data	Obs. without missing data	Minimum	Maximum	Mean	Std. deviation
	LoCo	201	0	201	2.557	6.971	5.65783	0.656905
	LoAb	201	0	201	1.521	4.145	3.25688	0.407943
	LoThx	201	0	201	0.57	1.978	1.5444	0.26266
	LoT	201	0	201	0.637	4.43	1.54697	0.480118
	LaT	201	0	201	0.78	3.45	1.97886	0.476671
	LoAn	201	0	201	0.567	3.15	2.05637	0.595152
	LoAA	201	0	201	1.743	6.96	4.39699	0.685398
	LaAA	201	0	201	0.449	2.881	1.46024	0.411084
	LoAP	201	0	201	1.194	4.98	3.3113	0.441782
	LaAP	201	0	201	0.324	1.64	0.85215	0.215082
	LoF	201	0	201	0.791	2.156	1.46296	0.222622
	LoTi	201	0	201	0.75	2.103	1.78092	0.238931
	LaTi	201	0	201	0.296	0.855	0.640473	0.101613
	LoM	201	0	201	0.247	8.971	0.698214	0.960593
	LaM	201	0	201	0.14	0.62	0.337886	0.0876176
	DoD	201	0	201	0.183	0.774	0.409204	0.099461
	DooD	201	0	201	0.111	0.579	0.381798	0.0761582
	La1T	201	0	201	0.413	1.875	0.959403	0.209343
	La2T	201	0	201	0.378	1.58	0.892423	0.166094
	La3T	201	0	201	0.305	1.222	0.699274	0.160681
	La4T	201	0	201	0.197	1.799	0.543736	0.179655
	LoYc	201	0	201	0.23	1.856	1.17806	0.342128
	LaYc	201	0	201	0.198	1.899	0.413331	0.226788
	NC	201	0	201	6	7	6.61194	0.488525
	Summary statistics (Qualitative data):
	Variable	Categories	Counts	Frequencies	%
	Locality	Ebang	33	33	16.4179
		Mbankomo	35	35	17.4129
		Messassi	42	42	20.8955
		Nkolbissong	16	16	7.9602
		Nkometou	75	75	37.3134
	Correlation matrix:
	Variables	LoCo	LoAb	LoThx	LoT	LaT	LoAn	LoAA	LaAA	LoAP	LaAP	LoF	LoTi	LaTi	LoM	LaM	DoD	DooD	La1T	La2T	La3T	La4T	LoYc	LaYc	NC
	LoCo	1	0.712213	0.333838	0.425451	0.543684	0.437899	0.35861	0.267531	0.371014	0.26223	0.22709	0.275765	0.147129	0.12688	0.120053	0.313362	0.517254	0.301218	0.418393	0.408138	0.186943	0.303952	0.083855	-0.177948
	LoAb	0.712213	1	0.267667	0.378025	0.476257	0.247196	0.391759	0.249641	0.219913	0.115533	0.483576	0.295649	0.281498	0.0898711	0.272297	0.341564	0.453468	0.217646	0.319106	0.421768	0.134573	0.396077	0.0851359	-0.207407
	LoThx	0.333838	0.267667	1	0.0598199	0.150315	0.057434	0.13981	0.0297355	0.332068	0.315954	0.163408	0.0622311	0.0445076	0.0241465	0.0304235	0.0407471	0.0940643	0.206787	0.104533	0.164688	-0.0848529	0.0488808	0.128117	-0.0122412
	LoT	0.425451	0.378025	0.0598199	1	0.882937	0.67289	0.677667	0.512617	0.124215	-0.0175251	0.103797	0.274308	0.276851	0.608174	0.101844	0.625851	0.718829	0.165986	0.308111	0.0996179	0.0687752	0.711461	0.119297	-0.367433
	LaT	0.543684	0.476257	0.150315	0.882937	1	0.791459	0.614143	0.559495	0.180917	0.063505	-0.0179961	0.242952	0.128853	0.391126	-0.091274	0.641238	0.737993	0.256454	0.37111	0.177464	0.0505381	0.785039	0.0793451	-0.40204
	LoAn	0.437899	0.247196	0.057434	0.67289	0.791459	1	0.51734	0.595277	0.310734	0.142462	-0.298562	0.241857	0.0288227	0.231643	-0.298117	0.619856	0.53389	0.263985	0.367879	0.0901373	0.0280304	0.656944	-0.00592634	-0.513923
	LoAA	0.35861	0.391759	0.13981	0.677667	0.614143	0.51734	1	0.731424	0.160853	-0.0885279	0.205535	0.516355	0.561478	0.398181	0.205518	0.432943	0.509616	0.16111	0.320532	0.216077	0.158839	0.652332	0.0321554	-0.318429
	LaAA	0.267531	0.249641	0.0297355	0.512617	0.559495	0.595277	0.731424	1	0.0504434	-0.145711	-0.0854515	0.433616	0.295401	0.0991728	-0.0587439	0.42054	0.444781	0.150171	0.346914	0.27788	0.137974	0.636077	-0.0677544	-0.353442
	LoAP	0.371014	0.219913	0.332068	0.124215	0.180917	0.310734	0.160853	0.0504434	1	0.631145	0.0224497	0.185685	0.108988	0.279452	0.102122	0.0941514	0.0655016	0.131579	0.0454303	0.220065	0.0532336	-0.0416363	0.0487627	-0.0990104
	LaAP	0.26223	0.115533	0.315954	-0.0175251	0.063505	0.142462	-0.0885279	-0.145711	0.631145	1	-0.00510053	-0.0625276	-0.162734	0.383815	0.0701119	-0.0763677	-0.14508	0.0527776	-0.112779	0.262029	-0.0594881	-0.187427	0.0148865	0.0386722
	LoF	0.22709	0.483576	0.163408	0.103797	-0.0179961	-0.298562	0.205535	-0.0854515	0.0224497	-0.00510053	1	0.374983	0.461266	0.113214	0.581911	0.149558	0.131219	0.0440154	-0.022193	0.230203	0.147092	0.0270361	0.229366	0.1701
	LoTi	0.275765	0.295649	0.0622311	0.274308	0.242952	0.241857	0.516355	0.433616	0.185685	-0.0625276	0.374983	1	0.586759	0.138632	0.387194	0.259406	0.285595	0.20762	0.343008	0.26135	0.201729	0.291191	0.0941325	-0.222088
	LaTi	0.147129	0.281498	0.0445076	0.276851	0.128853	0.0288227	0.561478	0.295401	0.108988	-0.162734	0.461266	0.586759	1	0.232976	0.614108	0.247492	0.159419	0.0669912	0.214468	0.116897	0.202109	0.179954	0.0939333	-0.195419
	LoM	0.12688	0.0898711	0.0241465	0.608174	0.391126	0.231643	0.398181	0.0991728	0.279452	0.383815	0.113214	0.138632	0.232976	1	0.363913	0.101533	0.154878	-0.034589	-0.0696133	0.0146994	0.00675863	0.20259	0.11577	-0.177522
	LaM	0.120053	0.272297	0.0304235	0.101844	-0.091274	-0.298117	0.205518	-0.0587439	0.102122	0.0701119	0.581911	0.387194	0.614108	0.363913	1	0.0525958	0.004851	-0.104531	-0.0744586	0.162409	0.0324783	-0.143661	-0.0643014	0.0737178
	DoD	0.313362	0.341564	0.0407471	0.625851	0.641238	0.619856	0.432943	0.42054	0.0941514	-0.0763677	0.149558	0.259406	0.247492	0.101533	0.0525958	1	0.727679	0.11541	0.235742	0.0389527	-0.0494906	0.664786	-0.0526213	-0.312424
	DooD	0.517254	0.453468	0.0940643	0.718829	0.737993	0.53389	0.509616	0.444781	0.0655016	-0.14508	0.131219	0.285595	0.159419	0.154878	0.004851	0.727679	1	0.212428	0.373148	0.138432	0.125968	0.678849	0.0760853	-0.226683
	La1T	0.301218	0.217646	0.206787	0.165986	0.256454	0.263985	0.16111	0.150171	0.131579	0.0527776	0.0440154	0.20762	0.0669912	-0.034589	-0.104531	0.11541	0.212428	1	0.570991	0.182337	0.246016	0.18639	0.234298	-0.0846082
	La2T	0.418393	0.319106	0.104533	0.308111	0.37111	0.367879	0.320532	0.346914	0.0454303	-0.112779	-0.022193	0.343008	0.214468	-0.0696133	-0.0744586	0.235742	0.373148	0.570991	1	0.405973	0.245083	0.353205	0.145027	-0.23564
	La3T	0.408138	0.421768	0.164688	0.0996179	0.177464	0.0901373	0.216077	0.27788	0.220065	0.262029	0.230203	0.26135	0.116897	0.0146994	0.162409	0.0389527	0.138432	0.182337	0.405973	1	0.293067	0.0824267	0.00825876	-0.0247562
	La4T	0.186943	0.134573	-0.0848529	0.0687752	0.0505381	0.0280304	0.158839	0.137974	0.0532336	-0.0594881	0.147092	0.201729	0.202109	0.00675863	0.0324783	-0.0494906	0.125968	0.246016	0.245083	0.293067	1	0.0139067	0.410763	-0.00698261
	LoYc	0.303952	0.396077	0.0488808	0.711461	0.785039	0.656944	0.652332	0.636077	-0.0416363	-0.187427	0.0270361	0.291191	0.179954	0.20259	-0.143661	0.664786	0.678849	0.18639	0.353205	0.0824267	0.0139067	1	0.074432	-0.348512
	LaYc	0.083855	0.0851359	0.128117	0.119297	0.0793451	-0.00592634	0.0321554	-0.0677544	0.0487627	0.0148865	0.229366	0.0941325	0.0939333	0.11577	-0.0643014	-0.0526213	0.0760853	0.234298	0.145027	0.00825876	0.410763	0.074432	1	0.0213376
	NC	-0.177948	-0.207407	-0.0122412	-0.367433	-0.40204	-0.513923	-0.318429	-0.353442	-0.0990104	0.0386722	0.1701	-0.222088	-0.195419	-0.177522	0.0737178	-0.312424	-0.226683	-0.0846082	-0.23564	-0.0247562	-0.00698261	-0.348512	0.0213376	1
	Discriminant Analysis:
	Means by class:
	Class \ Variable	LoCo	LoAb	LoThx	LoT	LaT	LoAn	LoAA	LaAA	LoAP	LaAP	LoF	LoTi	LaTi	LoM	LaM	DoD	DooD	La1T	La2T	La3T	La4T	LoYc	LaYc	NC
	Ebang	5.675	3.31409	1.42885	1.63258	2.03715	2.11912	4.78888	1.66452	3.38109	0.845788	1.46036	1.87424	0.69503	1.33636	0.37197	0.376545	0.364788	0.932364	0.902879	0.741879	0.612576	1.23282	0.412606	6.36364
	Mbankomo	5.40206	3.24406	1.5424	1.38817	1.6576	1.25297	4.02129	1.1006	3.04649	0.718143	1.65877	1.69129	0.654914	0.5474	0.387743	0.385514	0.379097	0.867543	0.832057	0.647343	0.538371	1.03214	0.4583	7
	Messassi	5.82379	3.15123	1.52795	1.47972	2.03145	2.24338	4.30007	1.49833	3.44012	0.958145	1.38133	1.74919	0.596357	0.569833	0.299548	0.400429	0.378238	1.00593	0.903381	0.742333	0.595214	1.17007	0.416238	7
	Nkolbissong	5.25069	3.01423	1.54725	1.50788	1.75519	1.67894	4.45756	1.36525	3.1315	0.828063	1.58519	1.76375	0.681313	0.5915	0.382625	0.417188	0.363188	0.92	0.808375	0.595	0.500812	1.00925	0.456812	6.75
	Nkometou	5.76356	3.34863	1.60477	1.62941	2.12139	2.37947	4.44123	1.53713	3.37039	0.863267	1.39236	1.80311	0.62572	0.582467	0.311547	0.43784	0.396507	0.99652	0.927787	0.702893	0.49628	1.26256	0.38176	6.29333
	Unidimensional test of equality of the means of the classes:
		Lambda	F	DF1	DF2	p-value
	LoCo	0.919508	4.28935	4	196	0.0023838
	LoAb	0.935223	3.39391	4	196	0.0103723
	LoThx	0.947416	2.71964	4	196	0.0309089
	LoT	0.959902	2.04686	4	196	0.0893435
	LaT	0.864345	7.6903	4	196	8.9231e-06
	LoAn	0.515843	45.9901	4	196	3.25102e-27
	LoAA	0.88709	6.23681	4	196	9.60175e-05
	LaAA	0.806121	11.7849	4	196	1.34358e-08
	LoAP	0.895189	5.73704	4	196	0.000218589
	LaAP	0.878915	6.75054	4	196	4.13295e-05
	LoF	0.774528	14.2643	4	196	3.08442e-10
	LoTi	0.94285	2.9701	4	196	0.0206519
	LaTi	0.888489	6.14983	4	196	0.000110779
	LoM	0.912683	4.68784	4	196	0.00123509
	LaM	0.823413	10.5084	4	196	9.84315e-08
	DoD	0.939047	3.18055	4	196	0.0146829
	DooD	0.972325	1.39467	4	196	0.237217
	La1T	0.938556	3.20784	4	196	0.0140457
	La2T	0.937831	3.24821	4	196	0.0131528
	La3T	0.921158	4.1939	4	196	0.00278997
	La4T	0.927643	3.82203	4	196	0.00514441
	LoYc	0.921475	4.17564	4	196	0.00287515
	LaYc	0.982875	0.853732	4	196	0.492823
	NC	0.54855	40.3264	4	196	1.25526e-24
	Wilks' Lambda test (Rao's approximation):
	Lambda	0.050262
	F (Observed value)	8.07792
	F (Critical value)	1.2717
	DF1	96
	DF2	687.855
	p-value (Two-tailed)	3.18483e-65
	alpha	0.05
	Test interpretation:
	H0: The means vectors of the 5 classes are equal.
	Ha: At least one of the means vector is different from another.
	As the computed p-value is lower than the significance level alpha=0.05, one should reject the null hypothesis H0, and accept the alternative hypothesis Ha.
	Pillai's trace:
	Trace	1.86941
	F (Observed value)	6.43435
	F (Critical value)	1.27118
	DF1	96
	DF2	704
	p-value (Two-tailed)	7.23413e-51
	alpha	0.05
	Test interpretation:
	H0: The means vectors of the 5 classes are equal.
	Ha: At least one of the means vector is different from another.
	As the computed p-value is lower than the significance level alpha=0.05, one should reject the null hypothesis H0, and accept the alternative hypothesis Ha.
	Hotelling-Lawley trace:
	Trace	5.89433
	F (Observed value)	10.5364
	F (Critical value)	1.2765
	DF1	96
	DF2	567.311
	p-value (Two-tailed)	2.36218e-78
	alpha	0.05
	Test interpretation:
	H0: The means vectors of the 5 classes are equal.
	Ha: At least one of the means vector is different from another.
	As the computed p-value is lower than the significance level alpha=0.05, one should reject the null hypothesis H0, and accept the alternative hypothesis Ha.
	Roy's greatest root:
	Root	4.10154
	F (Observed value)	30.078
	F (Critical value)	1.57941
	DF1	24
	DF2	176
	p-value (Two-tailed)	6.21953e-50
	alpha	0.05
	Test interpretation:
	H0: The means vectors of the 5 classes are equal.
	Ha: At least one of the means vector is different from another.
	As the computed p-value is lower than the significance level alpha=0.05, one should reject the null hypothesis H0, and accept the alternative hypothesis Ha.
	Sum of weights, prior probabilities and logarithms of determinants for each class:
	Classes	Sum of weights	Prior probabilities	Log(Determinant)
	Ebang	33	0.164179	-110.355
	Mbankomo	35	0.174129
	Messassi	42	0.208955
	Nkolbissong	16	0.079602	-425.255
	Nkometou	75	0.373134	-91.9447
	Multicolinearity statistics:
	Statistics	LoCo	LoAb	LoThx	LoT	LaT	LoAn	LoAA	LaAA	LoAP	LaAP	LoF	LoTi	LaTi	LoM	LaM	DoD	DooD	La1T	La2T	La3T	La4T	LoYc	LaYc	NC
	Tolerance	0.270248	0.274001	0.656583	0.0641439	0.0853692	0.110649	0.183283	0.274564	0.43531	0.271542	0.267913	0.413633	0.276	0.167109	0.271664	0.204131	0.202705	0.571951	0.380485	0.477531	0.612638	0.191002	0.611694	0.605755
	VIF	3.7003	3.64963	1.52304	15.59	11.7138	9.03761	5.45604	3.64214	2.29721	3.68267	3.73256	2.4176	3.62318	5.98411	3.68102	4.89881	4.93327	1.7484	2.62823	2.0941	1.63229	5.23555	1.6348	1.65083
	Between-classes SSCP matrix:
		LoCo	LoAb	LoThx	LoT	LaT	LoAn	LoAA	LaAA	LoAP	LaAP	LoF	LoTi	LaTi	LoM	LaM	DoD	DooD	La1T	La2T	La3T	La4T	LoYc	LaYc	NC
	LoCo	6.94681	1.71905	0.297916	1.90976	5.8628	13.5519	2.86604	4.82931	4.94787	2.1799	-3.6794	0.921914	-0.788888	0.594163	-1.19454	0.30747	0.227597	1.68232	1.45064	1.49713	0.349142	3.05134	-0.916313	-4.33562
	LoAb	1.71905	2.15599	0.260043	1.25038	1.86998	3.3378	1.40777	1.27594	0.78364	-0.252195	-0.69092	0.576541	0.0322048	1.46002	-0.142845	0.153962	0.15836	0.19211	0.56786	0.342419	-0.255948	1.44116	-0.420507	-5.09326
	LoThx	0.297916	0.260043	0.725563	0.10262	0.398964	1.13338	-1.19806	-0.436279	-0.0772619	0.00965135	-0.261487	-0.227997	-0.243505	-2.86306	-0.224185	0.262267	0.133256	0.243647	0.113062	-0.176939	-0.5145	0.181805	-0.143347	-0.784601
	LoT	1.90976	1.25038	0.10262	1.84861	2.82285	6.34818	3.70461	3.00321	1.78294	0.511249	-1.37808	0.999365	0.0816995	2.35466	-0.263375	0.236262	0.0796015	0.556906	0.605333	0.374971	-0.187698	1.61633	-0.482605	-6.01075
	LaT	5.8628	1.86998	0.398964	2.82285	6.16456	14.3717	5.02031	5.68281	4.67146	1.93372	-3.57912	1.4159	-0.458734	1.78438	-1.02138	0.461694	0.213614	1.62141	1.40188	1.17285	-0.0472126	3.23578	-0.993694	-7.88365
	LoAn	13.5519	3.3378	1.13338	6.34818	14.3717	34.2982	11.3208	13.2718	11.1202	5.00235	-8.60144	3.10578	-1.24373	2.39346	-2.54091	1.17528	0.481571	4.02983	3.16965	2.60409	-0.193021	7.22074	-2.27077	-16.9323
	LoAA	2.86604	1.40777	-1.19806	3.70461	5.02031	11.3208	10.6084	7.37888	3.88219	1.26195	-2.39194	2.57166	0.685866	10.2711	-0.102787	0.0276258	-0.139211	0.753818	0.920274	0.969529	0.552207	2.77617	-0.675139	-10.8169
	LaAA	4.82931	1.27594	-0.436279	3.00321	5.68281	13.2718	7.37888	6.55273	4.62391	1.91422	-3.20577	1.86064	-0.031735	5.48945	-0.679041	0.217008	0.0267445	1.32238	1.17955	1.18912	0.4055	2.93694	-0.814433	-7.98487
	LoAP	4.94787	0.78364	-0.0772619	1.78294	4.67146	11.1202	3.88219	4.62391	4.09122	1.91943	-2.92698	1.02175	-0.429748	1.96701	-0.836454	0.200807	0.0853165	1.31869	1.04137	1.12843	0.399966	2.29542	-0.667731	-3.87812
	LaAP	2.1799	-0.252195	0.00965135	0.511249	1.93372	5.00235	1.26195	1.91422	1.91943	1.12028	-1.38721	0.284676	-0.303622	-0.053526	-0.450875	0.0996993	0.0198268	0.689779	0.391595	0.469522	0.216856	0.772839	-0.240902	-0.359248
	LoF	-3.6794	-0.69092	-0.261487	-1.37808	-3.57912	-8.60144	-2.39194	-3.20577	-2.92698	-1.38721	2.2349	-0.664573	0.403525	-0.243947	0.697165	-0.265487	-0.119126	-1.06033	-0.803793	-0.730263	-0.0518112	-1.75489	0.550489	3.30743
	LoTi	0.921914	0.576541	-0.227997	0.999365	1.4159	3.10578	2.57166	1.86064	1.02175	0.284676	-0.664573	0.65252	0.145734	2.4462	-0.0564735	0.0308944	-0.00957995	0.215498	0.288912	0.271412	0.0930545	0.824036	-0.211663	-3.06734
	LaTi	-0.788888	0.0322048	-0.243505	0.0816995	-0.458734	-1.24373	0.685866	-0.031735	-0.429748	-0.303622	0.403525	0.145734	0.230274	1.3689	0.215977	-0.0809806	-0.0538294	-0.248134	-0.126039	-0.101467	0.0503059	-0.164168	0.0793824	-0.527181
	LoM	0.594163	1.46002	-2.86306	2.35466	1.78438	2.39346	10.2711	5.48945	1.96701	-0.053526	-0.243947	2.4462	1.3689	16.1141	0.813582	-0.777613	-0.420674	-0.59034	0.316255	1.08577	1.6857	1.52113	-0.0684818	-6.83968
	LaM	-1.19454	-0.142845	-0.224185	-0.263375	-1.02138	-2.54091	-0.102787	-0.679041	-0.836454	-0.450875	0.697165	-0.0564735	0.215977	0.813582	0.271126	-0.114795	-0.0604912	-0.367152	-0.241245	-0.193825	0.0481976	-0.467935	0.166466	0.501238
	DoD	0.30747	0.153962	0.262267	0.236262	0.461694	1.17528	0.0276258	0.217008	0.200807	0.0996993	-0.265487	0.0308944	-0.0809806	-0.777613	-0.114795	0.120595	0.0510964	0.162841	0.0999591	-0.0242749	-0.19612	0.224833	-0.0998267	-0.863814
	DooD	0.227597	0.15836	0.133256	0.0796015	0.213614	0.481571	-0.139211	0.0267445	0.0853165	0.0198268	-0.119126	-0.00957995	-0.0538294	-0.420674	-0.0604912	0.0510964	0.0321034	0.0695839	0.062237	0.0095976	-0.0854017	0.127733	-0.0520536	-0.347904
	La1T	1.68232	0.19211	0.243647	0.556906	1.62141	4.02983	0.753818	1.32238	1.31869	0.689779	-1.06033	0.215498	-0.248134	-0.59034	-0.367152	0.162841	0.0695839	0.538549	0.357598	0.288904	-0.0486314	0.746323	-0.253552	-1.24176
	La2T	1.45064	0.56786	0.113062	0.605333	1.40188	3.16965	0.920274	1.17955	1.04137	0.391595	-0.803793	0.288912	-0.126039	0.316255	-0.241245	0.0999591	0.062237	0.357598	0.343011	0.294062	-0.00936532	0.774639	-0.23613	-1.75766
	La3T	1.49713	0.342419	-0.176939	0.374971	1.17285	2.60409	0.969529	1.18912	1.12843	0.469522	-0.730263	0.271412	-0.101467	1.08577	-0.193825	-0.0242749	0.0095976	0.288904	0.294062	0.407114	0.258365	0.632335	-0.158611	-0.669458
	La4T	0.349142	-0.255948	-0.5145	-0.187698	-0.0472126	-0.193021	0.552207	0.4055	0.399966	0.216856	-0.0518112	0.0930545	0.0503059	1.6857	0.0481976	-0.19612	-0.0854017	-0.0486314	-0.00936532	0.258365	0.467076	-0.0502975	0.0787006	1.24125
	LoYc	3.05134	1.44116	0.181805	1.61633	3.23578	7.22074	2.77617	2.93694	2.29542	0.772839	-1.75489	0.824036	-0.164168	1.52113	-0.467935	0.224833	0.127733	0.746323	0.774639	0.632335	-0.0502975	1.83831	-0.54947	-4.95282
	LaYc	-0.916313	-0.420507	-0.143347	-0.482605	-0.993694	-2.27077	-0.675139	-0.814433	-0.667731	-0.240902	0.550489	-0.211663	0.0793824	-0.0684818	0.166466	-0.0998267	-0.0520536	-0.253552	-0.23613	-0.158611	0.0787006	-0.54947	0.176155	1.51455
	NC	-4.33562	-5.09326	-0.784601	-6.01075	-7.88365	-16.9323	-10.8169	-7.98487	-3.87812	-0.359248	3.30743	-3.06734	-0.527181	-6.83968	0.501238	-0.863814	-0.347904	-1.24176	-1.75766	-0.669458	1.24125	-4.95282	1.51455	21.5483
	Pooled within-class SSCP matrix:
		LoCo	LoAb	LoThx	LoT	LaT	LoAn	LoAA	LaAA	LoAP	LaAP	LoF	LoTi	LaTi	LoM	LaM	DoD	DooD	La1T	La2T	La3T	La4T	LoYc	LaYc	NC
	LoCo	79.3579	36.4526	11.2224	24.927	28.1856	20.6881	29.4262	9.61969	16.5864	5.23012	10.3214	7.73463	2.75305	15.4186	2.5765	3.78732	4.94791	6.60229	7.67933	7.11884	4.06331	10.6111	3.41482	-7.08557
	LoAb	36.4526	31.1274	5.47608	13.5576	16.6521	8.66544	20.4996	7.09696	7.14299	2.2796	9.47429	5.18686	2.30154	5.58349	2.08939	2.61778	2.65932	3.52528	3.75645	5.18685	2.22849	9.61482	1.9958	-3.17358
	LoThx	11.2224	5.47608	13.0725	1.40613	3.365	0.662271	6.23197	1.07842	7.7838	3.56023	2.17251	1.00909	0.481084	4.08154	0.364217	-0.0493682	0.243072	2.03044	0.799017	1.56706	-0.286312	0.696717	1.66968	0.470452
	LoT	24.927	13.5576	1.40613	44.2541	37.5906	32.1066	40.8956	17.2317	3.48645	-0.873194	3.59694	5.29409	2.6196	53.7431	1.12023	5.741	5.17718	2.77973	4.30871	1.16205	1.37415	21.7569	3.08054	-11.2255
	LaT	28.1856	16.6521	3.365	37.5906	39.2785	30.5343	35.109	16.244	2.94822	-0.631566	3.19718	4.11815	1.70695	34.0339	0.25897	5.61855	5.14457	3.49678	4.47443	1.54561	0.912792	22.3695	2.70919	-10.8406
	LoAn	20.6881	8.66544	0.662271	32.1066	30.5343	36.5429	30.8854	15.856	5.21985	-1.35514	0.689915	3.77264	1.59234	24.0925	-0.568199	6.16312	4.35821	2.54821	4.1034	-0.880129	0.792434	19.5324	2.11079	-12.952
	LoAA	29.4262	20.4996	6.23197	40.8956	35.109	30.8854	83.3458	33.8378	5.85895	-3.87205	8.66423	14.3403	7.13499	42.1605	2.57118	5.87515	5.45946	3.86951	6.37761	3.78982	3.35953	27.8175	1.67479	-10.5073
	LaAA	9.61969	7.09696	1.07842	17.2317	16.244	15.856	33.8378	27.2453	-2.79171	-4.49088	1.64173	6.6574	2.4996	2.34291	0.25587	3.2219	2.75824	1.2623	3.5578	2.48186	1.63247	14.9551	-0.448901	-6.21112
	LoAP	16.5864	7.14299	7.7838	3.48645	2.94822	5.21985	5.85895	-2.79171	34.9431	10.0748	3.36857	2.89827	1.40826	21.7513	1.62704	0.626598	0.355448	1.1151	-0.374662	1.99587	0.445047	-3.55405	1.64485	-0.395598
	LaAP	5.23012	2.2796	3.56023	-0.873194	-0.631566	-1.35514	-3.87205	-4.49088	10.0748	8.13178	1.33837	-0.927333	-0.407691	15.9132	0.715126	-0.426435	-0.495116	-0.214506	-1.19737	1.3416	-0.676587	-3.53123	0.386129	1.17193
	LoF	10.3214	9.47429	2.17251	3.59694	3.19718	0.689915	8.66423	1.64173	3.36857	1.33837	7.67719	4.65374	1.68335	5.08607	1.57294	0.927794	0.564074	1.4706	0.639671	2.37719	1.2284	2.16673	1.76555	0.392466
	LoTi	7.73463	5.18686	1.00909	5.29409	4.11815	3.77264	14.3403	6.6574	2.89827	-0.927333	4.65374	10.7651	2.70339	3.91743	1.67762	1.20203	1.04895	1.86148	2.43354	1.73533	1.6388	3.93665	1.23181	-2.11726
	LaTi	2.75305	2.30154	0.481084	2.6196	1.70695	1.59234	7.13499	2.4996	1.40826	-0.407691	1.68335	2.70339	1.83476	3.17917	0.877511	0.581236	0.300567	0.53314	0.849963	0.483188	0.687605	1.41538	0.353548	-1.41295
	LoM	15.4186	5.58349	4.08154	53.7431	34.0339	24.0925	42.1605	2.34291	21.7513	15.9132	5.08607	3.91743	3.17917	168.434	5.31215	2.71773	2.68675	-0.800787	-2.53759	-0.632006	-1.45242	11.7949	5.11258	-9.82163
	LaM	2.5765	2.08939	0.364217	1.12023	0.25897	-0.568199	2.57118	0.25587	1.62704	0.715126	1.57294	1.67762	0.877511	5.31215	1.26424	0.206465	0.0669651	-0.0163134	0.0245296	0.651121	0.0540504	-0.393355	-0.422008	0.129837
	DoD	3.78732	2.61778	-0.0493682	5.741	5.61855	6.16312	5.87515	3.2219	0.626598	-0.426435	0.927794	1.20203	0.581236	2.71773	0.206465	1.8579	1.0513	0.317761	0.678924	0.14878	0.019254	4.2995	-0.137564	-2.17228
	DooD	4.94791	2.65932	0.243072	5.17718	5.14457	4.35821	5.45946	2.75824	0.355448	-0.495116	0.564074	1.04895	0.300567	2.68675	0.0669651	1.0513	1.12791	0.607773	0.881782	0.329206	0.430106	3.40987	0.314879	-1.33885
	La1T	6.60229	3.52528	2.03044	2.77973	3.49678	2.54821	3.86951	1.2623	1.1151	-0.214506	1.4706	1.86148	0.53314	-0.800787	-0.0163134	0.317761	0.607773	8.22637	3.61314	0.937771	1.89914	1.92361	2.47828	-0.488804
	La2T	7.67933	3.75645	0.799017	4.30871	4.47443	4.1034	6.37761	3.5578	-0.374662	-1.19737	0.639671	2.43354	0.849963	-2.53759	0.0245296	0.678924	0.881782	3.61314	5.1744	1.87287	1.472	3.23956	1.32871	-2.06635
	La3T	7.11884	5.18685	1.56706	1.16205	1.54561	-0.880129	3.78982	2.48186	1.99587	1.3416	2.37719	1.73533	0.483188	-0.632006	0.651121	0.14878	0.329206	0.937771	1.87287	4.75658	1.43364	0.273923	0.218802	0.280801
	La4T	4.06331	2.22849	-0.286312	1.37415	0.912792	0.792434	3.35953	1.63247	0.445047	-0.676587	1.2284	1.6388	0.687605	-1.45242	0.0540504	0.019254	0.430106	1.89914	1.472	1.43364	5.9881	0.221253	3.26849	-1.36382
	LoYc	10.6111	9.61482	0.696717	21.7569	22.3695	19.5324	27.8175	14.9551	-3.55405	-3.53123	2.16673	3.93665	1.41538	11.7949	-0.393355	4.2995	3.40987	1.92361	3.23956	0.273923	0.221253	21.5721	1.70451	-6.69714
	LaYc	3.41482	1.9958	1.66968	3.08054	2.70919	2.11079	1.67479	-0.448901	1.64485	0.386129	1.76555	1.23181	0.353548	5.11258	-0.422008	-0.137564	0.314879	2.47828	1.32871	0.218802	3.26849	1.70451	10.1104	-1.04174
	NC	-7.08557	-3.17358	0.470452	-11.2255	-10.8406	-12.952	-10.5073	-6.21112	-0.395598	1.17193	0.392466	-2.11726	-1.41295	-9.82163	0.129837	-2.17228	-1.33885	-0.488804	-2.06635	0.280801	-1.36382	-6.69714	-1.04174	26.183
	Total-sample SSCP matrix:
		LoCo	LoAb	LoThx	LoT	LaT	LoAn	LoAA	LaAA	LoAP	LaAP	LoF	LoTi	LaTi	LoM	LaM	DoD	DooD	La1T	La2T	La3T	La4T	LoYc	LaYc	NC
	LoCo	86.3047	38.1717	11.5203	26.8367	34.0484	34.24	32.2922	14.449	21.5343	7.41002	6.64198	8.65654	1.96417	16.0127	1.38196	4.09479	5.1755	8.28461	9.12997	8.61597	4.41245	13.6624	2.49851	-11.4212
	LoAb	38.1717	33.2834	5.73612	14.808	18.522	12.0032	21.9074	8.3729	7.92663	2.0274	8.78337	5.76341	2.33374	7.0435	1.94654	2.77175	2.81768	3.71739	4.32431	5.52927	1.97254	11.056	1.5753	-8.26684
	LoThx	11.5203	5.73612	13.7981	1.50875	3.76396	1.79565	5.03392	0.642141	7.70654	3.56988	1.91102	0.781098	0.237578	1.21848	0.140032	0.212899	0.376328	2.27408	0.912079	1.39012	-0.800812	0.878521	1.52634	-0.314149
	LoT	26.8367	14.808	1.50875	46.1027	40.4135	38.4548	44.6003	20.2349	5.2694	-0.361945	2.21886	6.29345	2.7013	56.0977	0.856854	5.97726	5.25678	3.33663	4.91404	1.53702	1.18645	23.3732	2.59794	-17.2363
	LaT	34.0484	18.522	3.76396	40.4135	45.4431	44.9061	40.1293	21.9268	7.61968	1.30215	-0.38194	5.53404	1.24822	35.8182	-0.762408	6.08025	5.35819	5.11819	5.87631	2.71846	0.865579	25.6053	1.71549	-18.7243
	LoAn	34.24	12.0032	1.79565	38.4548	44.9061	70.8411	42.2062	29.1278	16.3401	3.64721	-7.91153	6.87842	0.348611	26.486	-3.10911	7.33839	4.83978	6.57804	7.27304	1.72396	0.599413	26.7531	-0.159979	-29.8843
	LoAA	32.2922	21.9074	5.03392	44.6003	40.1293	42.2062	93.9542	41.2167	9.74114	-2.6101	6.27229	16.912	7.82086	52.4315	2.4684	5.90278	5.32025	4.62333	7.29789	4.75935	3.91173	30.5936	0.999646	-21.3242
	LaAA	14.449	8.3729	0.642141	20.2349	21.9268	29.1278	41.2167	33.7981	1.8322	-2.57667	-1.56404	8.51804	2.46786	7.83236	-0.42317	3.43891	2.78499	2.58468	4.73735	3.67099	2.03796	17.892	-1.26333	-14.196
	LoAP	21.5343	7.92663	7.70654	5.2694	7.61968	16.3401	9.74114	1.8322	39.0343	11.9942	0.441586	3.92002	0.978514	23.7183	0.790588	0.827405	0.440765	2.43379	0.66671	3.1243	0.845013	-1.25863	0.977116	-4.27372
	LaAP	7.41002	2.0274	3.56988	-0.361945	1.30215	3.64721	-2.6101	-2.57667	11.9942	9.25207	-0.0488447	-0.642657	-0.711314	15.8597	0.264252	-0.326736	-0.475289	0.475273	-0.805776	1.81112	-0.459731	-2.75839	0.145227	0.812681
	LoF	6.64198	8.78337	1.91102	2.21886	-0.38194	-7.91153	6.27229	-1.56404	0.441586	-0.0488447	9.91209	3.98916	2.08688	4.84212	2.2701	0.662308	0.444948	0.410262	-0.164122	1.64693	1.17659	0.411842	2.31604	3.6999
	LoTi	8.65654	5.76341	0.781098	6.29345	5.53404	6.87842	16.912	8.51804	3.92002	-0.642657	3.98916	11.4176	2.84912	6.36363	1.62115	1.23292	1.03937	2.07698	2.72245	2.00674	1.73185	4.76069	1.02015	-5.1846
	LaTi	1.96417	2.33374	0.237578	2.7013	1.24822	0.348611	7.82086	2.46786	0.978514	-0.711314	2.08688	2.84912	2.06503	4.54808	1.09349	0.500256	0.246738	0.285007	0.723924	0.381721	0.737911	1.25121	0.43293	-1.94013
	LoM	16.0127	7.0435	1.21848	56.0977	35.8182	26.486	52.4315	7.83236	23.7183	15.8597	4.84212	6.36363	4.54808	184.548	6.12573	1.94012	2.26608	-1.39113	-2.22134	0.453768	0.233274	13.3161	5.0441	-16.6613
	LaM	1.38196	1.94654	0.140032	0.856854	-0.762408	-3.10911	2.4684	-0.42317	0.790588	0.264252	2.2701	1.62115	1.09349	6.12573	1.53537	0.0916697	0.00647395	-0.383466	-0.216715	0.457295	0.102248	-0.86129	-0.255542	0.631075
	DoD	4.09479	2.77175	0.212899	5.97726	6.08025	7.33839	5.90278	3.43891	0.827405	-0.326736	0.662308	1.23292	0.500256	1.94012	0.0916697	1.9785	1.1024	0.480602	0.778883	0.124505	-0.176866	4.52433	-0.237391	-3.03609
	DooD	5.1755	2.81768	0.376328	5.25678	5.35819	4.83978	5.32025	2.78499	0.440765	-0.475289	0.444948	1.03937	0.246738	2.26608	0.00647395	1.1024	1.16001	0.677357	0.944019	0.338804	0.344704	3.5376	0.262825	-1.68676
	La1T	8.28461	3.71739	2.27408	3.33663	5.11819	6.57804	4.62333	2.58468	2.43379	0.475273	0.410262	2.07698	0.285007	-1.39113	-0.383466	0.480602	0.677357	8.76492	3.97073	1.22667	1.85051	2.66993	2.22473	-1.73057
	La2T	9.12997	4.32431	0.912079	4.91404	5.87631	7.27304	7.29789	4.73735	0.66671	-0.805776	-0.164122	2.72245	0.723924	-2.22134	-0.216715	0.778883	0.944019	3.97073	5.51742	2.16693	1.46264	4.0142	1.09258	-3.82401
	La3T	8.61597	5.52927	1.39012	1.53702	2.71846	1.72396	4.75935	3.67099	3.1243	1.81112	1.64693	2.00674	0.381721	0.453768	0.457295	0.124505	0.338804	1.22667	2.16693	5.16369	1.692	0.906258	0.0601908	-0.388657
	La4T	4.41245	1.97254	-0.800812	1.18645	0.865579	0.599413	3.91173	2.03796	0.845013	-0.459731	1.17659	1.73185	0.737911	0.233274	0.102248	-0.176866	0.344704	1.85051	1.46264	1.692	6.45518	0.170955	3.34719	-0.122567
	LoYc	13.6624	11.056	0.878521	23.3732	25.6053	26.7531	30.5936	17.892	-1.25863	-2.75839	0.411842	4.76069	1.25121	13.3161	-0.86129	4.52433	3.5376	2.66993	4.0142	0.906258	0.170955	23.4104	1.15505	-11.65
	LaYc	2.49851	1.5753	1.52634	2.59794	1.71549	-0.159979	0.999646	-1.26333	0.977116	0.145227	2.31604	1.02015	0.43293	5.0441	-0.255542	-0.237391	0.262825	2.22473	1.09258	0.0601908	3.34719	1.15505	10.2866	0.472806
	NC	-11.4212	-8.26684	-0.314149	-17.2363	-18.7243	-29.8843	-21.3242	-14.196	-4.27372	0.812681	3.6999	-5.1846	-1.94013	-16.6613	0.631075	-3.03609	-1.68676	-1.73057	-3.82401	-0.388657	-0.122567	-11.65	0.472806	47.7313
	Between-classes covariance matrix:
		LoCo	LoAb	LoThx	LoT	LaT	LoAn	LoAA	LaAA	LoAP	LaAP	LoF	LoTi	LaTi	LoM	LaM	DoD	DooD	La1T	La2T	La3T	La4T	LoYc	LaYc	NC
	LoCo	0.0432015	0.0106906	0.00185271	0.0118766	0.0364602	0.0842779	0.0178236	0.030033	0.0307703	0.0135566	-0.0228818	0.00573329	-0.00490602	0.00369504	-0.00742873	0.00191213	0.00141541	0.0104622	0.00902138	0.00931051	0.00217128	0.018976	-0.00569847	-0.0269628
	LoAb	0.0106906	0.0134079	0.00161718	0.00777602	0.0116292	0.0207575	0.00875479	0.00793492	0.00487338	-0.00156838	-0.00429676	0.00358545	0.000200278	0.0090797	-0.00088834	0.000957476	0.000984823	0.00119472	0.00353147	0.00212947	-0.00159172	0.00896246	-0.00261509	-0.0316745
	LoThx	0.00185271	0.00161718	0.00451221	0.000638187	0.00248112	0.00704836	-0.0074506	-0.00271318	-0.000480484	6.00208e-05	-0.00162616	-0.00141789	-0.00151434	-0.0178051	-0.00139419	0.00163102	0.000828707	0.00151522	0.000703123	-0.00110037	-0.00319963	0.00113063	-0.000891459	-0.00487936
	LoT	0.0118766	0.00777602	0.000638187	0.0114963	0.0175551	0.0394787	0.0230387	0.0186767	0.011088	0.00317941	-0.00857015	0.00621496	0.000508081	0.0146434	-0.00163791	0.00146929	0.000495034	0.00346334	0.00376451	0.00233191	-0.00116727	0.0100518	-0.00300127	-0.0373803
	LaT	0.0364602	0.0116292	0.00248112	0.0175551	0.0383368	0.0893765	0.0312208	0.0353409	0.0290514	0.0120256	-0.0222582	0.00880533	-0.00285282	0.0110969	-0.00635185	0.00287123	0.00132844	0.0100834	0.00871817	0.00729383	-0.000293611	0.020123	-0.00617969	-0.0490277
	LoAn	0.0842779	0.0207575	0.00704836	0.0394787	0.0893765	0.213297	0.0704033	0.0825364	0.0691556	0.0311091	-0.0534915	0.0193145	-0.00773463	0.0148847	-0.0158017	0.00730894	0.00299485	0.0250611	0.0197117	0.0161946	-0.00120038	0.0449051	-0.0141217	-0.1053
	LoAA	0.0178236	0.00875479	-0.0074506	0.0230387	0.0312208	0.0704033	0.0659726	0.0458886	0.0241429	0.00784792	-0.0148752	0.0159929	0.00426533	0.0638747	-0.000639224	0.000171802	-0.000865741	0.00468792	0.0057231	0.00602941	0.00343413	0.0172648	-0.00419863	-0.0672692
	LaAA	0.030033	0.00793492	-0.00271318	0.0186767	0.0353409	0.0825364	0.0458886	0.0407508	0.0287557	0.0119043	-0.0199364	0.0115711	-0.000197357	0.0341384	-0.00422289	0.00134955	0.000166321	0.00822378	0.00733549	0.00739505	0.00252176	0.0182646	-0.00506488	-0.0496572
	LoAP	0.0307703	0.00487338	-0.000480484	0.011088	0.0290514	0.0691556	0.0241429	0.0287557	0.0254429	0.0119367	-0.0182026	0.00635418	-0.00267256	0.0122327	-0.00520183	0.0012488	0.000530575	0.00820082	0.00647619	0.0070176	0.00248735	0.014275	-0.00415255	-0.0241177
	LaAP	0.0135566	-0.00156838	6.00208e-05	0.00317941	0.0120256	0.0311091	0.00784792	0.0119043	0.0119367	0.00696694	-0.00862695	0.00177037	-0.0018882	-0.000332873	-0.00280395	0.000620021	0.000123301	0.00428967	0.00243529	0.00291991	0.0013486	0.00480621	-0.00149815	-0.00223413
	LoF	-0.0228818	-0.00429676	-0.00162616	-0.00857015	-0.0222582	-0.0534915	-0.0148752	-0.0199364	-0.0182026	-0.00862695	0.0138986	-0.00413292	0.00250949	-0.00151709	0.0043356	-0.00165104	-0.000740833	-0.00659412	-0.00499871	-0.00454144	-0.000322209	-0.0109135	0.00342344	0.0205686
	LoTi	0.00573329	0.00358545	-0.00141789	0.00621496	0.00880533	0.0193145	0.0159929	0.0115711	0.00635418	0.00177037	-0.00413292	0.00405796	0.000906305	0.0152127	-0.000351203	0.000192129	-5.95768e-05	0.00134016	0.00179671	0.00168789	0.000578697	0.0051246	-0.00131631	-0.0190755
	LaTi	-0.00490602	0.000200278	-0.00151434	0.000508081	-0.00285282	-0.00773463	0.00426533	-0.000197357	-0.00267256	-0.0018882	0.00250949	0.000906305	0.00143205	0.00851308	0.00134314	-0.000503611	-0.00033476	-0.00154312	-0.000783827	-0.000631013	0.000312848	-0.00102095	0.000493672	-0.00327849
	LoM	0.00369504	0.0090797	-0.0178051	0.0146434	0.0110969	0.0148847	0.0638747	0.0341384	0.0122327	-0.000332873	-0.00151709	0.0152127	0.00851308	0.100212	0.00505959	-0.0048359	-0.00261613	-0.00367127	0.00196676	0.00675233	0.0104832	0.00945975	-0.000425882	-0.0425353
	LaM	-0.00742873	-0.00088834	-0.00139419	-0.00163791	-0.00635185	-0.0158017	-0.000639224	-0.00422289	-0.00520183	-0.00280395	0.0043356	-0.000351203	0.00134314	0.00505959	0.00168611	-0.000713901	-0.000376189	-0.00228329	-0.00150028	-0.00120538	0.000299736	-0.00291004	0.00103524	0.00311715
	DoD	0.00191213	0.000957476	0.00163102	0.00146929	0.00287123	0.00730894	0.000171802	0.00134955	0.0012488	0.000620021	-0.00165104	0.000192129	-0.000503611	-0.0048359	-0.000713901	0.000749968	0.000317764	0.00101269	0.000621636	-0.000150964	-0.00121965	0.00139821	-0.000620813	-0.00537198
	DooD	0.00141541	0.000984823	0.000828707	0.000495034	0.00132844	0.00299485	-0.000865741	0.000166321	0.000530575	0.000123301	-0.000740833	-5.95768e-05	-0.00033476	-0.00261613	-0.000376189	0.000317764	0.000199648	0.000432736	0.000387046	5.96866e-05	-0.000531105	0.000794358	-0.000323716	-0.00216358
	La1T	0.0104622	0.00119472	0.00151522	0.00346334	0.0100834	0.0250611	0.00468792	0.00822378	0.00820082	0.00428967	-0.00659412	0.00134016	-0.00154312	-0.00367127	-0.00228329	0.00101269	0.000432736	0.00334918	0.00222387	0.00179667	-0.000302434	0.00464131	-0.00157682	-0.00772241
	La2T	0.00902138	0.00353147	0.000703123	0.00376451	0.00871817	0.0197117	0.0057231	0.00733549	0.00647619	0.00243529	-0.00499871	0.00179671	-0.000783827	0.00196676	-0.00150028	0.000621636	0.000387046	0.00222387	0.00213316	0.00182874	-5.82421e-05	0.00481741	-0.00146847	-0.0109307
	La3T	0.00931051	0.00212947	-0.00110037	0.00233191	0.00729383	0.0161946	0.00602941	0.00739505	0.0070176	0.00291991	-0.00454144	0.00168789	-0.000631013	0.00675233	-0.00120538	-0.000150964	5.96866e-05	0.00179667	0.00182874	0.0025318	0.00160675	0.00393243	-0.000986385	-0.0041633
	La4T	0.00217128	-0.00159172	-0.00319963	-0.00116727	-0.000293611	-0.00120038	0.00343413	0.00252176	0.00248735	0.0013486	-0.000322209	0.000578697	0.000312848	0.0104832	0.000299736	-0.00121965	-0.000531105	-0.000302434	-5.82421e-05	0.00160675	0.0029047	-0.000312796	0.000489432	0.00771923
	LoYc	0.018976	0.00896246	0.00113063	0.0100518	0.020123	0.0449051	0.0172648	0.0182646	0.014275	0.00480621	-0.0109135	0.0051246	-0.00102095	0.00945975	-0.00291004	0.00139821	0.000794358	0.00464131	0.00481741	0.00393243	-0.000312796	0.0114323	-0.0034171	-0.0308011
	LaYc	-0.00569847	-0.00261509	-0.000891459	-0.00300127	-0.00617969	-0.0141217	-0.00419863	-0.00506488	-0.00415255	-0.00149815	0.00342344	-0.00131631	0.000493672	-0.000425882	0.00103524	-0.000620813	-0.000323716	-0.00157682	-0.00146847	-0.000986385	0.000489432	-0.0034171	0.00109549	0.00941884
	NC	-0.0269628	-0.0316745	-0.00487936	-0.0373803	-0.0490277	-0.1053	-0.0672692	-0.0496572	-0.0241177	-0.00223413	0.0205686	-0.0190755	-0.00327849	-0.0425353	0.00311715	-0.00537198	-0.00216358	-0.00772241	-0.0109307	-0.0041633	0.00771923	-0.0308011	0.00941884	0.134007
	Within-class covariance matrix for class Ebang:
		LoCo	LoAb	LoThx	LoT	LaT	LoAn	LoAA	LaAA	LoAP	LaAP	LoF	LoTi	LaTi	LoM	LaM	DoD	DooD	La1T	La2T	La3T	La4T	LoYc	LaYc	NC
	LoCo	0.451791	0.101116	0.0410398	0.157187	0.08616	0.111795	0.17001	0.0193079	0.0610609	0.0407307	0.0138319	0.0170811	0.0118724	0.414044	0.0188211	-0.00518544	0.00663981	-0.00101309	0.00477491	0.011046	0.00522494	-0.0390556	0.0235066	-0.10625
	LoAb	0.101116	0.145146	0.0521089	0.0370426	0.0209308	-0.000405511	0.10499	-0.00867052	0.0112974	0.00596739	0.049733	0.0080056	0.0177166	0.13398	0.0172624	0.00695114	-0.000291011	-0.0125147	-0.0182468	0.011782	-0.0135778	0.00764536	-0.000291338	-0.0454091
	LoThx	0.0410398	0.0521089	0.0475054	0.0313396	0.022752	0.00212783	0.061549	-0.00669176	0.0167493	0.00892753	0.0204423	0.00602171	0.00965354	0.108873	0.0111779	0.00336155	0.000405811	-0.00314737	-0.00473203	0.000199731	-0.00719013	0.00831311	0.00685888	-0.0186776
	LoT	0.157187	0.0370426	0.0313396	0.525982	0.318042	0.227503	0.36707	0.00804023	0.215771	0.156293	0.0330003	0.0183319	0.0240674	1.63146	0.048485	0.0219635	0.0250461	-0.0139648	-0.0306929	-0.0109246	-0.0189013	0.0994738	0.0444447	-0.0815909
	LaT	0.08616	0.0209308	0.022752	0.318042	0.204631	0.140762	0.232428	0.00295929	0.124379	0.0996864	0.0236748	0.0117471	0.0148967	1.02224	0.0297081	0.0143445	0.0152677	-0.00985803	-0.019547	-0.00597089	-0.0108485	0.0640988	0.0277773	-0.0569006
	LoAn	0.111795	-0.000405511	0.00212783	0.227503	0.140762	0.131365	0.155229	0.013235	0.0903911	0.0715138	0.00526908	0.00795966	0.00499134	0.712964	0.0181809	0.00622881	0.011528	-0.00319417	-0.00960548	-0.00872367	-0.00518301	0.0324902	0.0249128	-0.058733
	LoAA	0.17001	0.10499	0.061549	0.36707	0.232428	0.155229	0.378384	0.0136048	0.137892	0.105822	0.0513204	0.0195815	0.0338076	1.18601	0.0518248	0.0181005	0.0178435	-0.0230044	-0.0329836	-0.00216205	-0.0223666	0.0761566	0.0320516	-0.0747983
	LaAA	0.0193079	-0.00867052	-0.00669176	0.00804023	0.00295929	0.013235	0.0136048	0.0178962	0.00587308	0.00503374	-0.000164193	0.00160946	-0.00148633	0.0156717	0.00298398	0.00138152	0.00180689	-0.00407863	-0.00599644	-0.00204603	0.00078335	-0.00196643	0.00916508	-0.00506818
	LoAP	0.0610609	0.0112974	0.0167493	0.215771	0.124379	0.0903911	0.137892	0.00587308	0.109826	0.0666741	0.0175902	0.0136334	0.0107188	0.649806	0.0206281	0.0108282	0.00942377	-0.00582769	-0.0131473	-0.00292039	-0.00599127	0.0418248	0.0192927	-0.0353153
	LaAP	0.0407307	0.00596739	0.00892753	0.156293	0.0996864	0.0715138	0.105822	0.00503374	0.0666741	0.0559787	0.0153166	0.00633537	0.00321585	0.498448	0.0128815	0.0073164	0.00786877	-0.00261433	-0.0101601	-0.0019349	-0.00297631	0.0313929	0.0182946	-0.0213892
	LoF	0.0138319	0.049733	0.0204423	0.0330003	0.0236748	0.00526908	0.0513204	-0.000164193	0.0175902	0.0153166	0.0365066	0.00510128	0.00807114	0.120053	0.00818329	0.00632358	0.000538798	-0.0115898	-0.0180676	0.00805586	-0.00118359	0.0127639	0.00368021	-0.0127926
	LoTi	0.0170811	0.0080056	0.00602171	0.0183319	0.0117471	0.00795966	0.0195815	0.00160946	0.0136334	0.00633537	0.00510128	0.00878094	0.00424796	0.0597512	0.00423198	0.00281221	0.000539866	-0.000751216	-0.00195534	0.00227137	0.00127479	0.00446126	0.00320935	-0.0153097
	LaTi	0.0118724	0.0177166	0.00965354	0.0240674	0.0148967	0.00499134	0.0338076	-0.00148633	0.0107188	0.00321585	0.00807114	0.00424796	0.0103759	0.0728644	0.00709513	0.00231392	0.000660475	-0.00414936	-0.0027169	0.0018326	-0.00336796	0.00518166	-0.00116327	-0.0191989
	LoM	0.414044	0.13398	0.108873	1.63146	1.02224	0.712964	1.18601	0.0156717	0.649806	0.498448	0.120053	0.0597512	0.0728644	5.22711	0.154609	0.0739785	0.0772472	-0.0491919	-0.103829	-0.0370503	-0.0650165	0.337579	0.139228	-0.274199
	LaM	0.0188211	0.0172624	0.0111779	0.048485	0.0297081	0.0181809	0.0518248	0.00298398	0.0206281	0.0128815	0.00818329	0.00423198	0.00709513	0.154609	0.0121491	0.00405708	0.00271706	-0.00373746	-0.0054326	0.00193293	-0.00311992	0.0123178	0.0023623	-0.0160199
	DoD	-0.00518544	0.00695114	0.00336155	0.0219635	0.0143445	0.00622881	0.0181005	0.00138152	0.0108282	0.0073164	0.00632358	0.00281221	0.00231392	0.0739785	0.00405708	0.00363788	0.00126615	-0.00268999	-0.00567206	0.00107366	-0.00160376	0.0087546	0.0011966	-0.00407955
	DooD	0.00663981	-0.000291011	0.000405811	0.0250461	0.0152677	0.011528	0.0178435	0.00180689	0.00942377	0.00786877	0.000538798	0.000539866	0.000660475	0.0772472	0.00271706	0.00126615	0.00195067	-0.000342795	-0.00148315	-0.000603277	-0.000230843	0.00469993	0.00198285	-0.0025767
	La1T	-0.00101309	-0.0125147	-0.00314737	-0.0139648	-0.00985803	-0.00319417	-0.0230044	-0.00407863	-0.00582769	-0.00261433	-0.0115898	-0.000751216	-0.00414936	-0.0491919	-0.00373746	-0.00268999	-0.000342795	0.0151709	0.014965	-0.00194058	0.000719784	-0.00376987	0.00136287	-0.00332386
	La2T	0.00477491	-0.0182468	-0.00473203	-0.0306929	-0.019547	-0.00960548	-0.0329836	-0.00599644	-0.0131473	-0.0101601	-0.0180676	-0.00195534	-0.0027169	-0.103829	-0.0054326	-0.00567206	-0.00148315	0.014965	0.0217121	-0.00224292	0.00108095	-0.0117427	-0.000940549	-0.0137045
	La3T	0.011046	0.011782	0.000199731	-0.0109246	-0.00597089	-0.00872367	-0.00216205	-0.00204603	-0.00292039	-0.0019349	0.00805586	0.00227137	0.0018326	-0.0370503	0.00193293	0.00107366	-0.000603277	-0.00194058	-0.00224292	0.0114433	0.00561673	-0.000427616	-0.00305796	0.000264205
	La4T	0.00522494	-0.0135778	-0.00719013	-0.0189013	-0.0108485	-0.00518301	-0.0223666	0.00078335	-0.00599127	-0.00297631	-0.00118359	0.00127479	-0.00336796	-0.0650165	-0.00311992	-0.00160376	-0.000230843	0.000719784	0.00108095	0.00561673	0.0132959	-0.00621589	-0.0039172	0.00800284
	LoYc	-0.0390556	0.00764536	0.00831311	0.0994738	0.0640988	0.0324902	0.0761566	-0.00196643	0.0418248	0.0313929	0.0127639	0.00446126	0.00518166	0.337579	0.0123178	0.0087546	0.00469993	-0.00376987	-0.0117427	-0.000427616	-0.00621589	0.0415182	0.0112338	0.0103182
	LaYc	0.0235066	-0.000291338	0.00685888	0.0444447	0.0277773	0.0249128	0.0320516	0.00916508	0.0192927	0.0182946	0.00368021	0.00320935	-0.00116327	0.139228	0.0023623	0.0011966	0.00198285	0.00136287	-0.000940549	-0.00305796	-0.0039172	0.0112338	0.0574125	0.0103665
	NC	-0.10625	-0.0454091	-0.0186776	-0.0815909	-0.0569006	-0.058733	-0.0747983	-0.00506818	-0.0353153	-0.0213892	-0.0127926	-0.0153097	-0.0191989	-0.274199	-0.0160199	-0.00407955	-0.0025767	-0.00332386	-0.0137045	0.000264205	0.00800284	0.0103182	0.0103665	0.238636
	Within-class covariance matrix for class Mbankomo:
		LoCo	LoAb	LoThx	LoT	LaT	LoAn	LoAA	LaAA	LoAP	LaAP	LoF	LoTi	LaTi	LoM	LaM	DoD	DooD	La1T	La2T	La3T	La4T	LoYc	LaYc	NC
	LoCo	1.20759	0.608287	0.179626	0.23761	0.262005	0.121162	0.42871	0.0844231	0.363589	0.104579	0.316384	0.259796	0.080541	0.0753974	0.0714895	0.0478264	0.0686392	0.151542	0.119478	0.120543	0.0802135	0.0852392	0.0818804	0
	LoAb	0.608287	0.398411	0.105023	0.121798	0.16702	0.0611162	0.250079	0.0535074	0.224261	0.0663683	0.204267	0.15853	0.0465928	0.0444043	0.0403112	0.0324837	0.0381456	0.0904944	0.0752998	0.078242	0.0445801	0.0929982	0.0549141	0
	LoThx	0.179626	0.105023	0.0769914	0.0619672	0.065738	0.0571401	0.198286	0.0593035	0.139499	0.0297923	0.0549416	0.0714859	0.0292094	0.0249277	0.0118864	0.0129153	0.012631	0.0304094	0.0343449	0.0199522	0.0174738	0.0475392	0.0153514	0
	LoT	0.23761	0.121798	0.0619672	0.074256	0.0771031	0.0465155	0.150101	0.0231392	0.108871	0.0281992	0.0711073	0.0756772	0.0268185	0.0260634	0.0177236	0.012296	0.0145949	0.0410262	0.0339511	0.0255451	0.0183942	0.0218069	0.0196281	0
	LaT	0.262005	0.16702	0.065738	0.0771031	0.130548	0.0452751	0.145863	0.0151302	0.114395	0.0347495	0.10146	0.0910356	0.0271542	0.0310184	0.0203057	0.0145126	0.0147371	0.0506974	0.0408616	0.0361274	0.0137473	0.0469322	0.0301667	0
	LoAn	0.121162	0.0611162	0.0571401	0.0465155	0.0452751	0.0653657	0.156453	0.0449617	0.102166	0.0212833	0.0367103	0.0495885	0.022221	0.0196687	0.0089177	0.0150246	0.0102994	0.0237008	0.0247977	0.0137347	0.014613	0.034581	0.0115471	0
	LoAA	0.42871	0.250079	0.198286	0.150101	0.145863	0.156453	0.529227	0.168859	0.368018	0.0750259	0.123695	0.17287	0.075072	0.0610685	0.0276219	0.0353899	0.0329875	0.0717479	0.0848844	0.0488765	0.0484472	0.124117	0.0345263	0
	LaAA	0.0844231	0.0535074	0.0593035	0.0231392	0.0151302	0.0449617	0.168859	0.0904685	0.11667	0.0184787	0.0132395	0.0358347	0.0191264	0.0116451	0.00218831	0.00940577	0.00858886	0.00386022	0.0192643	0.00718258	0.0133541	0.0501371	0.00310495	0
	LoAP	0.363589	0.224261	0.139499	0.108871	0.114395	0.102166	0.368018	0.11667	0.267817	0.0576905	0.108998	0.13107	0.0530666	0.0436425	0.0227895	0.0263025	0.0264523	0.0570162	0.064336	0.0438372	0.0367991	0.0974074	0.029912	0
	LaAP	0.104579	0.0663683	0.0297923	0.0281992	0.0347495	0.0212833	0.0750259	0.0184787	0.0576905	0.0144872	0.0349193	0.0340784	0.0118819	0.0110709	0.00708583	0.00667639	0.00688376	0.0174234	0.016261	0.0138203	0.00851327	0.0224037	0.00987982	0
	LoF	0.316384	0.204267	0.0549416	0.0711073	0.10146	0.0367103	0.123695	0.0132395	0.108998	0.0349193	0.114703	0.0876494	0.0247666	0.0263567	0.0222102	0.0173444	0.0190398	0.0528087	0.0404467	0.0411518	0.02079	0.0450483	0.0315214	0
	LoTi	0.259796	0.15853	0.0714859	0.0756772	0.0910356	0.0495885	0.17287	0.0358347	0.13107	0.0340784	0.0876494	0.0873456	0.0299702	0.028529	0.0192444	0.0154358	0.0166031	0.0450154	0.0404232	0.0316138	0.0202447	0.0426313	0.0243951	0
	LaTi	0.080541	0.0465928	0.0292094	0.0268185	0.0271542	0.022221	0.075072	0.0191264	0.0530666	0.0118819	0.0247666	0.0299702	0.0123474	0.0101032	0.00597059	0.00572575	0.00566003	0.0139861	0.0145033	0.00854721	0.0080623	0.0144366	0.00661367	0
	LoM	0.0753974	0.0444043	0.0249277	0.0260634	0.0310184	0.0196687	0.0610685	0.0116451	0.0436425	0.0110709	0.0263567	0.028529	0.0101032	0.0102378	0.00599202	0.00511276	0.00491962	0.0148634	0.0130914	0.00965374	0.00607705	0.0139052	0.00778707	0
	LaM	0.0714895	0.0403112	0.0118864	0.0177236	0.0203057	0.0089177	0.0276219	0.00218831	0.0227895	0.00708583	0.0222102	0.0192444	0.00597059	0.00599202	0.00569631	0.00379287	0.00442813	0.0114547	0.00890184	0.008299	0.00532286	0.00431633	0.00607451	0
	DoD	0.0478264	0.0324837	0.0129153	0.012296	0.0145126	0.0150246	0.0353899	0.00940577	0.0263025	0.00667639	0.0173444	0.0154358	0.00572575	0.00511276	0.00379287	0.00526655	0.00401057	0.00878236	0.00785391	0.00671552	0.00538169	0.0107475	0.00500889	0
	DooD	0.0686392	0.0381456	0.012631	0.0145949	0.0147371	0.0102994	0.0329875	0.00858886	0.0264523	0.00688376	0.0190398	0.0166031	0.00566003	0.00491962	0.00442813	0.00401057	0.0047024	0.00949414	0.00785064	0.00748204	0.00618687	0.00696426	0.00489956	0
	La1T	0.151542	0.0904944	0.0304094	0.0410262	0.0506974	0.0237008	0.0717479	0.00386022	0.0570162	0.0174234	0.0528087	0.0450154	0.0139861	0.0148634	0.0114547	0.00878236	0.00949414	0.0283157	0.02041	0.0194999	0.0114291	0.0163971	0.0148224	0
	La2T	0.119478	0.0752998	0.0343449	0.0339511	0.0408616	0.0247977	0.0848844	0.0192643	0.064336	0.016261	0.0404467	0.0404232	0.0145033	0.0130914	0.00890184	0.00785391	0.00785064	0.02041	0.0195879	0.0145826	0.00999774	0.0221896	0.0112159	0
	La3T	0.120543	0.078242	0.0199522	0.0255451	0.0361274	0.0137347	0.0488765	0.00718258	0.0438372	0.0138203	0.0411518	0.0316138	0.00854721	0.00965374	0.008299	0.00671552	0.00748204	0.0194999	0.0145826	0.0185725	0.00801931	0.0199735	0.0120835	0
	La4T	0.0802135	0.0445801	0.0174738	0.0183942	0.0137473	0.014613	0.0484472	0.0133541	0.0367991	0.00851327	0.02079	0.0202447	0.0080623	0.00607705	0.00532286	0.00538169	0.00618687	0.0114291	0.00999774	0.00801931	0.0138829	0.00716153	0.00491396	0
	LoYc	0.0852392	0.0929982	0.0475392	0.0218069	0.0469322	0.034581	0.124117	0.0501371	0.0974074	0.0224037	0.0450483	0.0426313	0.0144366	0.0139052	0.00431633	0.0107475	0.00696426	0.0163971	0.0221896	0.0199735	0.00716153	0.0684072	0.0145949	0
	LaYc	0.0818804	0.0549141	0.0153514	0.0196281	0.0301667	0.0115471	0.0345263	0.00310495	0.029912	0.00987982	0.0315214	0.0243951	0.00661367	0.00778707	0.00607451	0.00500889	0.00489956	0.0148224	0.0112159	0.0120835	0.00491396	0.0145949	0.0093105	0
	NC	0	0	0	0	0	0	0	0	0	0	0	0	0	0	0	0	0	0	0	0	0	0	0	0
	Within-class covariance matrix for class Messassi:
		LoCo	LoAb	LoThx	LoT	LaT	LoAn	LoAA	LaAA	LoAP	LaAP	LoF	LoTi	LaTi	LoM	LaM	DoD	DooD	La1T	La2T	La3T	La4T	LoYc	LaYc	NC
	LoCo	0.209853	0.0535238	0.0530547	0.136365	0.167919	0.150025	0.0904689	0.0815638	-0.0196606	-0.0134066	-0.0188023	-0.0344523	-0.00315824	-0.00128089	-0.00967664	0.0313668	0.0241046	0.0179567	0.0407661	0.0158363	-0.000209636	0.0990593	-0.0114185	0
	LoAb	0.0535238	0.0349133	0.0071351	0.0397975	0.0501677	0.0412891	0.0295348	0.0256127	-0.0061386	-0.00460371	-0.00334647	-0.0129111	0.000866272	-0.00307093	-0.00217965	0.00618803	0.00496078	0.00285564	0.00895757	0.00178149	0.000525623	0.0280364	0.00498978	0
	LoThx	0.0530547	0.0071351	0.0309983	0.0296022	0.0403432	0.0377486	0.00624059	0.0078245	-0.000929897	-0.000775578	-0.00801393	-0.014673	-0.0025284	-0.000950911	-0.00596795	0.00885053	0.00655589	0.0127347	0.0081658	0.00139414	0.000831547	0.0225186	-0.00202043	0
	LoT	0.136365	0.0397975	0.0296022	0.187851	0.201956	0.177641	0.228669	0.164327	-0.0706421	-0.0550713	0.000248681	0.00977063	0.00724016	0.00455865	-0.00978389	0.033343	0.0310234	0.0293373	0.0386574	0.0145965	-0.00125955	0.154941	0.00887446	0
	LaT	0.167919	0.0501677	0.0403432	0.201956	0.231388	0.201072	0.216404	0.161174	-0.0652258	-0.0486463	-0.00499562	-0.00542594	0.00436615	0.00211788	-0.0127426	0.0377087	0.0332687	0.0341445	0.0379196	0.0111362	-0.0024002	0.163955	0.00498557	0
	LoAn	0.150025	0.0412891	0.0377486	0.177641	0.201072	0.185199	0.179701	0.135164	-0.0544123	-0.047117	-0.0092725	-0.00384354	0.00208847	4.82114e-05	-0.0129958	0.0319651	0.0302519	0.0322572	0.039347	0.00582016	-0.00468118	0.142842	0.00989439	0
	LoAA	0.0904689	0.0295348	0.00624059	0.228669	0.216404	0.179701	0.45882	0.261926	-0.137819	-0.107096	0.0289625	0.0593817	0.0243679	0.0141657	-0.00182224	0.0364055	0.0368607	0.0173082	0.0389549	0.0240535	0.00236225	0.203733	-0.00687743	0
	LaAA	0.0815638	0.0256127	0.0078245	0.164327	0.161174	0.135164	0.261926	0.25665	-0.0974647	-0.0578962	0.012219	0.051437	0.0164692	0.0108166	0.000975618	0.0298971	0.0255222	0.0131694	0.0389287	0.0334104	0.0114121	0.14356	-0.0120749	0
	LoAP	-0.0196606	-0.0061386	-0.000929897	-0.0706421	-0.0652258	-0.0544123	-0.137819	-0.0974647	0.0545793	0.0388058	-0.00608836	-0.02475	-0.00877912	-0.00842274	0.00218301	-0.00970622	-0.00982786	-0.0104659	-0.0146088	-0.00884067	-0.00207298	-0.0669834	-0.00360981	0
	LaAP	-0.0134066	-0.00460371	-0.000775578	-0.0550713	-0.0486463	-0.047117	-0.107096	-0.0578962	0.0388058	0.0452696	-0.00151597	-0.0227353	-0.00565696	-0.0038745	0.00294744	-0.00600399	-0.00953651	-0.0108009	-0.0157266	0.00290007	-9.01294e-05	-0.051282	-0.00904286	0
	LoF	-0.0188023	-0.00334647	-0.00801393	0.000248681	-0.00499562	-0.0092725	0.0289625	0.012219	-0.00608836	-0.00151597	0.0155239	0.0138008	0.00363788	0.00116108	0.00387703	-0.000623683	-0.000678862	-0.00215224	-0.00176015	0.0056595	0.00156302	0.00454337	0.00505358	0
	LoTi	-0.0344523	-0.0129111	-0.014673	0.00977063	-0.00542594	-0.00384354	0.0593817	0.051437	-0.02475	-0.0227353	0.0138008	0.0754805	0.0111823	0.00735528	0.00826284	0.00023038	0.00314842	-0.00954225	0.00889297	0.00922162	0.00589718	0.0166677	0.00553781	0
	LaTi	-0.00315824	0.000866272	-0.0025284	0.00724016	0.00436615	0.00208847	0.0243679	0.0164692	-0.00877912	-0.00565696	0.00363788	0.0111823	0.00651565	0.00302613	0.00238592	0.000773038	0.000662767	-0.000489218	0.00306206	0.00295744	-0.000158347	0.00615205	0.00414967	0
	LoM	-0.00128089	-0.00307093	-0.000950911	0.00455865	0.00211788	4.82114e-05	0.0141657	0.0108166	-0.00842274	-0.0038745	0.00116108	0.00735528	0.00302613	0.00665941	0.000477142	0.000214659	0.00032026	0.00256933	0.00260799	0.00258186	0.000778061	0.00551694	0.00537558	0
	LaM	-0.00967664	-0.00217965	-0.00596795	-0.00978389	-0.0127426	-0.0129958	-0.00182224	0.000975618	0.00218301	0.00294744	0.00387703	0.00826284	0.00238592	0.000477142	0.00555552	-0.000937972	-0.00187348	-0.00458323	-0.00157238	0.00265781	0.00094488	-0.00917194	-0.00749438	0
	DoD	0.0313668	0.00618803	0.00885053	0.033343	0.0377087	0.0319651	0.0364055	0.0298971	-0.00970622	-0.00600399	-0.000623683	0.00023038	0.000773038	0.000214659	-0.000937972	0.00911649	0.00696716	0.00618928	0.00720444	0.0048242	0.000993808	0.026206	-0.00382037	0
	DooD	0.0241046	0.00496078	0.00655589	0.0310234	0.0332687	0.0302519	0.0368607	0.0255222	-0.00982786	-0.00953651	-0.000678862	0.00314842	0.000662767	0.00032026	-0.00187348	0.00696716	0.00756545	0.00614548	0.00699418	0.00188824	0.000515436	0.0251489	0.00064082	0
	La1T	0.0179567	0.00285564	0.0127347	0.0293373	0.0341445	0.0322572	0.0173082	0.0131694	-0.0104659	-0.0108009	-0.00215224	-0.00954225	-0.000489218	0.00256933	-0.00458323	0.00618928	0.00614548	0.0468589	0.0160202	-0.00064461	-0.00127662	0.0258624	0.00973726	0
	La2T	0.0407661	0.00895757	0.0081658	0.0386574	0.0379196	0.039347	0.0389549	0.0389287	-0.0146088	-0.0157266	-0.00176015	0.00889297	0.00306206	0.00260799	-0.00157238	0.00720444	0.00699418	0.0160202	0.0313382	0.0125974	-0.000593669	0.031782	0.0129154	0
	La3T	0.0158363	0.00178149	0.00139414	0.0145965	0.0111362	0.00582016	0.0240535	0.0334104	-0.00884067	0.00290007	0.0056595	0.00922162	0.00295744	0.00258186	0.00265781	0.0048242	0.00188824	-0.00064461	0.0125974	0.0242237	0.00477827	0.0140852	-0.00369908	0
	La4T	-0.000209636	0.000525623	0.000831547	-0.00125955	-0.0024002	-0.00468118	0.00236225	0.0114121	-0.00207298	-9.01294e-05	0.00156302	0.00589718	-0.000158347	0.000778061	0.00094488	0.000993808	0.000515436	-0.00127662	-0.000593669	0.00477827	0.00686398	-0.000704943	-0.00411871	0
	LoYc	0.0990593	0.0280364	0.0225186	0.154941	0.163955	0.142842	0.203733	0.14356	-0.0669834	-0.051282	0.00454337	0.0166677	0.00615205	0.00551694	-0.00917194	0.026206	0.0251489	0.0258624	0.031782	0.0140852	-0.000704943	0.143419	0.00970486	0
	LaYc	-0.0114185	0.00498978	-0.00202043	0.00887446	0.00498557	0.00989439	-0.00687743	-0.0120749	-0.00360981	-0.00904286	0.00505358	0.00553781	0.00414967	0.00537558	-0.00749438	-0.00382037	0.00064082	0.00973726	0.0129154	-0.00369908	-0.00411871	0.00970486	0.0926873	0
	NC	0	0	0	0	0	0	0	0	0	0	0	0	0	0	0	0	0	0	0	0	0	0	0	0
	Within-class covariance matrix for class Nkolbissong:
		LoCo	LoAb	LoThx	LoT	LaT	LoAn	LoAA	LaAA	LoAP	LaAP	LoF	LoTi	LaTi	LoM	LaM	DoD	DooD	La1T	La2T	La3T	La4T	LoYc	LaYc	NC
	LoCo	0.347065	0.19549	0.0510852	-0.0539144	0.0466529	-0.00153129	-0.0266348	-0.0499898	0.213403	0.0722789	0.041605	0.0259867	0.00639964	0.00953797	0.0181431	0.00551826	0.0153515	0.0160517	0.0243959	0.0426165	0.0137336	0.00173435	0.00482214	-0.0204167
	LoAb	0.19549	0.132675	0.0199148	-0.0256416	0.0209502	-0.0252482	-0.0537374	-0.0513286	0.0363381	0.0288449	0.0417094	0.0208053	0.00104389	0.00512265	0.0123029	0.00263577	0.0092416	0.0138842	0.0173056	0.0241048	0.0102433	0.00045526	0.00360103	0.0174867
	LoThx	0.0510852	0.0199148	0.0290626	0.0107857	0.0247714	0.0297635	0.093732	0.0387549	0.0298887	0.0128182	0.0111599	0.0190739	0.0107465	0.00874093	0.00337223	0.00500428	0.00464382	0.00262307	0.0098557	0.00452767	0.00643732	0.0181311	0.00580252	-0.0104667
	LoT	-0.0539144	-0.0256416	0.0107857	0.0957536	0.0218988	0.0269749	0.127031	0.067211	-0.0449927	-0.050258	0.0423812	0.0300044	0.018506	0.00888033	0.00173002	0.0100786	0.00437556	0.00782293	0.0133075	-0.00718307	0.0162512	0.0307492	0.020216	-0.00616667
	LaT	0.0466529	0.0209502	0.0247714	0.0218988	0.0303668	0.0292566	0.11523	0.0476364	0.0434068	0.00497959	0.0173312	0.0291846	0.0152819	0.0102596	0.00399874	0.00683856	0.00603116	0.0132927	0.00746386	0.0052808	0.0107009	0.0193688	0.00832724	-0.00408333
	LoAn	-0.00153129	-0.0252482	0.0297635	0.0269749	0.0292566	0.102623	0.155945	0.0831626	0.118038	0.0218891	-0.00327152	0.0291063	0.0159097	0.0140146	-0.000399825	0.00917095	-4.00542e-05	0.0166469	0.00815069	-0.0042072	-0.00307181	0.012898	0.00594552	-0.06415
	LoAA	-0.0266348	-0.0537374	0.093732	0.127031	0.11523	0.155945	0.624425	0.299785	0.0710407	-0.0193424	0.0359122	0.119193	0.072252	0.0459136	0.00377389	0.0287523	0.0170257	0.0456723	0.0130063	-0.010816	0.0384282	0.0962353	0.0350268	-0.0223833
	LaAA	-0.0499898	-0.0513286	0.0387549	0.067211	0.0476364	0.0831626	0.299785	0.163944	0.0334798	-0.0196886	0.00984222	0.0514598	0.0357179	0.0220829	-0.000571767	0.0125736	0.00504882	0.00990047	-0.000210433	-0.0133813	0.01418	0.0433945	0.0179334	-0.0522
	LoAP	0.213403	0.0363381	0.0298887	-0.0449927	0.0434068	0.118038	0.0710407	0.0334798	0.763023	0.089112	-0.0557513	-0.0067512	0.013407	0.00108107	-0.0005282	0.00577477	0.00260823	0.0405442	-0.0107915	0.0465293	-0.0002205	-0.0461008	-0.000898033	-0.169867
	LaAP	0.0722789	0.0288449	0.0128182	-0.050258	0.00497959	0.0218891	-0.0193424	-0.0196886	0.089112	0.0535321	-0.0242552	-0.00408225	-0.00466949	0.000843233	0.00119016	-0.00264495	-0.000236813	0.00535067	-0.00112562	0.0096254	-0.00866065	-0.0141334	-0.0111032	-0.01445
	LoF	0.041605	0.0417094	0.0111599	0.0423812	0.0173312	-0.00327152	0.0359122	0.00984222	-0.0557513	-0.0242552	0.04867	0.0269127	0.00873667	0.0067673	0.00650488	0.00675923	0.00581396	0.00752	0.0165257	0.00416533	0.0129328	0.0205281	0.0137503	0.01285
	LoTi	0.0259867	0.0208053	0.0190739	0.0300044	0.0291846	0.0291063	0.119193	0.0514598	-0.0067512	-0.00408225	0.0269127	0.0411578	0.0165169	0.0133573	0.00442743	0.00797025	0.00572438	0.0201899	0.00673503	0.00265027	0.0111258	0.0204703	0.00969942	-0.00326667
	LaTi	0.00639964	0.00104389	0.0107465	0.018506	0.0152819	0.0159097	0.072252	0.0357179	0.013407	-0.00466949	0.00873667	0.0165169	0.0102552	0.00596657	0.00133553	0.00406954	0.0030992	0.00489793	0.00156241	-0.0002624	0.00639226	0.0117707	0.00561053	-0.00645
	LoM	0.00953797	0.00512265	0.00874093	0.00888033	0.0102596	0.0140146	0.0459136	0.0220829	0.00108107	0.000843233	0.0067673	0.0133573	0.00596657	0.00544187	0.00118167	0.00258077	0.00170863	0.0072972	0.00199673	3.05333e-05	0.00306497	0.00772173	0.0031819	-0.00986667
	LaM	0.0181431	0.0123029	0.00337223	0.00173002	0.00399874	-0.000399825	0.00377389	-0.000571767	-0.0005282	0.00119016	0.00650488	0.00442743	0.00133553	0.00118167	0.00154385	0.000855675	0.00128388	0.000248533	0.00243615	0.0020054	0.00178113	0.00230117	0.00136692	0.0009
	DoD	0.00551826	0.00263577	0.00500428	0.0100786	0.00683856	0.00917095	0.0287523	0.0125736	0.00577477	-0.00264495	0.00675923	0.00797025	0.00406954	0.00258077	0.000855675	0.0026899	0.00160383	0.0028516	0.00273273	1.98667e-05	0.00268664	0.00571708	0.0029843	0.000983333
	DooD	0.0153515	0.0092416	0.00464382	0.00437556	0.00603116	-4.00542e-05	0.0170257	0.00504882	0.00260823	-0.000236813	0.00581396	0.00572438	0.0030992	0.00170863	0.00128388	0.00160383	0.00213376	0.00181387	0.00187192	0.00198667	0.00340144	0.00457808	0.00197124	0.00498333
	La1T	0.0160517	0.0138842	0.00262307	0.00782293	0.0132927	0.0166469	0.0456723	0.00990047	0.0405442	0.00535067	0.00752	0.0201899	0.00489793	0.0072972	0.000248533	0.0028516	0.00181387	0.0609123	0.00260873	0.00567333	0.00608393	0.00393927	0.00238787	0.0100667
	La2T	0.0243959	0.0173056	0.0098557	0.0133075	0.00746386	0.00815069	0.0130063	-0.000210433	-0.0107915	-0.00112562	0.0165257	0.00673503	0.00156241	0.00199673	0.00243615	0.00273273	0.00187192	0.00260873	0.0110363	0.00256827	0.00305421	0.00822083	0.00419988	0.00956667
	La3T	0.0426165	0.0241048	0.00452767	-0.00718307	0.0052808	-0.0042072	-0.010816	-0.0133813	0.0465293	0.0096254	0.00416533	0.00265027	-0.0002624	3.05333e-05	0.0020054	1.98667e-05	0.00198667	0.00567333	0.00256827	0.0106051	0.00323967	-0.0034058	0.000169133	-0.000533333
	La4T	0.0137336	0.0102433	0.00643732	0.0162512	0.0107009	-0.00307181	0.0384282	0.01418	-0.0002205	-0.00866065	0.0129328	0.0111258	0.00639226	0.00306497	0.00178113	0.00268664	0.00340144	0.00608393	0.00305421	0.00323967	0.00801203	0.00958692	0.0052679	0.00888333
	LoYc	0.00173435	0.00045526	0.0181311	0.0307492	0.0193688	0.012898	0.0962353	0.0433945	-0.0461008	-0.0141334	0.0205281	0.0204703	0.0117707	0.00772173	0.00230117	0.00571708	0.00457808	0.00393927	0.00822083	-0.0034058	0.00958692	0.0261207	0.00933365	0.0105333
	LaYc	0.00482214	0.00360103	0.00580252	0.020216	0.00832724	0.00594552	0.0350268	0.0179334	-0.000898033	-0.0111032	0.0137503	0.00969942	0.00561053	0.0031819	0.00136692	0.0029843	0.00197124	0.00238787	0.00419988	0.000169133	0.0052679	0.00933365	0.00611723	-0.00531667
	NC	-0.0204167	0.0174867	-0.0104667	-0.00616667	-0.00408333	-0.06415	-0.0223833	-0.0522	-0.169867	-0.01445	0.01285	-0.00326667	-0.00645	-0.00986667	0.0009	0.000983333	0.00498333	0.0100667	0.00956667	-0.000533333	0.00888333	0.0105333	-0.00531667	0.2
	Within-class covariance matrix for class Nkometou:
		LoCo	LoAb	LoThx	LoT	LaT	LoAn	LoAA	LaAA	LoAP	LaAP	LoF	LoTi	LaTi	LoM	LaM	DoD	DooD	La1T	La2T	La3T	La4T	LoYc	LaYc	NC
	LoCo	0.135575	0.100112	0.0116254	0.0950807	0.120755	0.0927443	0.0824332	0.0477998	-0.00168294	-0.00220896	-0.0098847	-0.00840936	-0.00448331	-0.00655276	-0.00448411	0.0129506	0.0159884	0.00682792	0.0192828	0.0186268	0.0131276	0.0658819	0.00370956	-0.0456665
	LoAb	0.100112	0.128584	-0.00477657	0.0943792	0.107196	0.071437	0.111248	0.0712834	-0.0153622	-0.00556485	0.00607196	-0.00327124	0.00134156	-0.00222346	0.000962585	0.0134818	0.0139144	0.00707567	0.0155852	0.0231755	0.0131359	0.068269	-0.00162908	-0.0267944
	LoThx	0.0116254	-0.00477657	0.0976729	-0.0416094	-0.0219432	-0.045172	-0.0559615	-0.0219715	0.028306	0.0283937	-0.00254713	-0.0175491	-0.0118714	-0.00462235	-0.00275016	-0.0139729	-0.00726779	0.00724006	-0.00945833	0.0102327	-0.0105539	-0.0321739	0.0124872	0.0165559
	LoT	0.0950807	0.0943792	-0.0416094	0.21297	0.21869	0.210231	0.172501	0.114083	-0.0479542	-0.0516427	-0.00706256	0.0173484	0.00490779	0.00446132	-0.00890142	0.041917	0.0343498	0.00691266	0.0317835	0.00205942	0.0156954	0.148898	0.00437657	-0.115163
	LaT	0.120755	0.107196	-0.0219432	0.21869	0.247963	0.213619	0.163661	0.112327	-0.0391644	-0.041665	-0.0143947	0.00583409	-0.00136787	0.000363541	-0.0124272	0.0407766	0.0364927	0.00661093	0.0276214	-0.000370893	0.00987069	0.158242	0.0062882	-0.121062
	LoAn	0.0927443	0.071437	-0.045172	0.210231	0.213619	0.283571	0.147186	0.0961429	-0.00926974	-0.0373479	-0.00402164	0.0209853	0.00476797	0.00536174	-0.0123563	0.0541193	0.0324245	0.00368031	0.024759	-0.0168036	0.00945206	0.152256	0.00575841	-0.136625
	LoAA	0.0824332	0.111248	-0.0559615	0.172501	0.163661	0.147186	0.338727	0.167912	-0.0875843	-0.0692993	0.0147324	0.0488325	0.01916	0.0116529	-0.000111531	0.0293077	0.02703	0.0104257	0.0372267	0.0185575	0.0237132	0.153566	-0.0103809	-0.105108
	LaAA	0.0477998	0.0712834	-0.0219715	0.114083	0.112327	0.0961429	0.167912	0.143445	-0.0466565	-0.035286	0.00740853	0.0338744	0.00926836	0.00906434	0.00073725	0.0195069	0.0173819	0.00774477	0.0202944	0.0153246	0.00638869	0.0915743	-0.0084011	-0.0711613
	LoAP	-0.00168294	-0.0153622	0.028306	-0.0479542	-0.0391644	-0.00926974	-0.0875843	-0.0466565	0.116754	0.0412434	0.00250864	-0.0118696	-0.00784007	-0.00266483	0.00149352	-0.00409264	-0.00650908	-0.0110273	-0.0186559	0.00355933	-0.0071095	-0.0644117	0.00232355	0.044358
	LaAP	-0.00220896	-0.00556485	0.0283937	-0.0516427	-0.041665	-0.0373479	-0.0692993	-0.035286	0.0412434	0.0430927	0.0011752	-0.0175047	-0.00827844	-0.00361227	-0.00103645	-0.00813135	-0.00792453	-0.00487388	-0.0103168	0.00905872	-0.00996204	-0.0403103	2.82946e-05	0.0280153
	LoF	-0.0098847	0.00607196	-0.00254713	-0.00706256	-0.0143947	-0.00402164	0.0147324	0.00740853	0.00250864	0.0011752	0.0167912	0.00730938	0.00409202	0.00269095	0.00404588	0.000809653	-0.00216078	0.000289405	-0.004501	0.00575303	0.00407215	-0.00361557	0.00219737	0.00823081
	LoTi	-0.00840936	-0.00327124	-0.0175491	0.0173484	0.00583409	0.0209853	0.0488325	0.0338744	-0.0118696	-0.0175047	0.00730938	0.0513825	0.0113816	0.00720914	0.00652301	0.00619222	0.00340836	0.00599162	0.00886602	0.00229646	0.00677047	0.0182972	-0.00098465	-0.021329
	LaTi	-0.00448331	0.00134156	-0.0118714	0.00490779	-0.00136787	0.00476797	0.01916	0.00926836	-0.00784007	-0.00827844	0.00409202	0.0113816	0.00894523	0.00392479	0.00445421	0.00296997	0.00018013	0.00185111	0.00398395	0.000224605	0.00583608	0.0044584	-0.00119442	-0.00948432
	LoM	-0.00655276	-0.00222346	-0.00462235	0.00446132	0.000363541	0.00536174	0.0116529	0.00906434	-0.00266483	-0.00361227	0.00269095	0.00720914	0.00392479	0.00626068	0.00167085	0.00174421	0.000119139	0.000718903	0.00274256	0.00160893	0.00464339	0.00240014	0.00168126	-0.0121523
	LaM	-0.00448411	0.000962585	-0.00275016	-0.00890142	-0.0124272	-0.0123563	-0.000111531	0.00073725	0.00149352	-0.00103645	0.00404588	0.00652301	0.00445421	0.00167085	0.00582249	-0.000360776	-0.00152679	-0.00137825	-0.00103195	0.00227094	-0.00125063	-0.00801012	-0.00564012	0.00849964
	DoD	0.0129506	0.0134818	-0.0139729	0.041917	0.0407766	0.0541193	0.0293077	0.0195069	-0.00409264	-0.00813135	0.000809653	0.00619222	0.00296997	0.00174421	-0.000360776	0.0155176	0.0076313	-0.00258505	0.00347329	-0.00421615	-0.00261417	0.0336991	-0.00316604	-0.0277903
	DooD	0.0159884	0.0139144	-0.00726779	0.0343498	0.0364927	0.0324245	0.02703	0.0173819	-0.00650908	-0.00792453	-0.00216078	0.00340836	0.00018013	0.000119139	-0.00152679	0.0076313	0.00761374	0.000226611	0.00469569	-0.000176972	0.00209438	0.0259853	0.000391894	-0.0179885
	La1T	0.00682792	0.00707567	0.00724006	0.00691266	0.00661093	0.00368031	0.0104257	0.00774477	-0.0110273	-0.00487388	0.000289405	0.00599162	0.00185111	0.000718903	-0.00137825	-0.00258505	0.000226611	0.0532874	0.0235724	0.0037595	0.0195756	0.00496346	0.0202117	-0.00720865
	La2T	0.0192828	0.0155852	-0.00945833	0.0317835	0.0276214	0.024759	0.0372267	0.0202944	-0.0186559	-0.0103168	-0.004501	0.00886602	0.00398395	0.00274256	-0.00103195	0.00347329	0.00469569	0.0235724	0.0319354	0.0120786	0.0145407	0.0193852	0.00520184	-0.0239366
	La3T	0.0186268	0.0231755	0.0102327	0.00205942	-0.000370893	-0.0168036	0.0185575	0.0153246	0.00355933	0.00905872	0.00575303	0.00229646	0.000224605	0.00160893	0.00227094	-0.00421615	-0.000176972	0.0037595	0.0120786	0.0352254	0.00995596	-0.012404	0.000742488	0.00378847
	La4T	0.0131276	0.0131359	-0.0105539	0.0156954	0.00987069	0.00945206	0.0237132	0.00638869	-0.0071095	-0.00996204	0.00407215	0.00677047	0.00583608	0.00464339	-0.00125063	-0.00261417	0.00209438	0.0195756	0.0145407	0.00995596	0.063365	0.000834706	0.0448191	-0.0236914
	LoYc	0.0658819	0.068269	-0.0321739	0.148898	0.158242	0.152256	0.153566	0.0915743	-0.0644117	-0.0403103	-0.00361557	0.0182972	0.0044584	0.00240014	-0.00801012	0.0336991	0.0259853	0.00496346	0.0193852	-0.012404	0.000834706	0.157374	0.00420137	-0.0970989
	LaYc	0.00370956	-0.00162908	0.0124872	0.00437657	0.0062882	0.00575841	-0.0103809	-0.0084011	0.00232355	2.82946e-05	0.00219737	-0.00098465	-0.00119442	0.00168126	-0.00564012	-0.00316604	0.000391894	0.0202117	0.00520184	0.000742488	0.0448191	0.00420137	0.0549285	-0.0174827
	NC	-0.0456665	-0.0267944	0.0165559	-0.115163	-0.121062	-0.136625	-0.105108	-0.0711613	0.044358	0.0280153	0.00823081	-0.021329	-0.00948432	-0.0121523	0.00849964	-0.0277903	-0.0179885	-0.00720865	-0.0239366	0.00378847	-0.0236914	-0.0970989	-0.0174827	0.21009
	Pooled within-class covariance matrix:
		LoCo	LoAb	LoThx	LoT	LaT	LoAn	LoAA	LaAA	LoAP	LaAP	LoF	LoTi	LaTi	LoM	LaM	DoD	DooD	La1T	La2T	La3T	La4T	LoYc	LaYc	NC
	LoCo	0.404887	0.185983	0.057257	0.127178	0.143804	0.105551	0.150134	0.04908	0.0846245	0.0266843	0.0526601	0.0394624	0.0140462	0.0786662	0.0131454	0.019323	0.0252444	0.0336852	0.0391803	0.0363206	0.0207312	0.0541381	0.0174226	-0.0361509
	LoAb	0.185983	0.158813	0.0279392	0.0691716	0.0849595	0.0442114	0.10459	0.036209	0.0364438	0.0116306	0.0483382	0.0264636	0.0117425	0.0284872	0.0106601	0.013356	0.013568	0.0179861	0.0191655	0.0264635	0.0113699	0.0490552	0.0101827	-0.0161917
	LoThx	0.057257	0.0279392	0.0666966	0.00717415	0.0171684	0.00337893	0.0317958	0.00550214	0.0397133	0.0181644	0.0110842	0.00514844	0.00245451	0.0208242	0.00185825	-0.000251878	0.00124016	0.0103594	0.00407662	0.0079952	-0.00146078	0.00355468	0.0085188	0.00240026
	LoT	0.127178	0.0691716	0.00717415	0.225786	0.191789	0.163809	0.208651	0.087917	0.017788	-0.00445507	0.0183517	0.0270107	0.0133653	0.274199	0.00571545	0.0292908	0.0264142	0.0141823	0.0219832	0.00592884	0.00701095	0.111004	0.0157171	-0.057273
	LaT	0.143804	0.0849595	0.0171684	0.191789	0.200401	0.155787	0.179127	0.0828776	0.0150419	-0.00322227	0.0163121	0.021011	0.00870895	0.173642	0.00132128	0.0286661	0.0262478	0.0178407	0.0228287	0.00788578	0.0046571	0.11413	0.0138224	-0.0553094
	LoAn	0.105551	0.0442114	0.00337893	0.163809	0.155787	0.186443	0.157578	0.0808978	0.0266319	-0.00691395	0.00351997	0.0192482	0.00812418	0.122921	-0.00289898	0.0314445	0.0222358	0.0130011	0.0209357	-0.00449045	0.00404303	0.0996551	0.0107693	-0.0660815
	LoAA	0.150134	0.10459	0.0317958	0.208651	0.179127	0.157578	0.425234	0.172642	0.0298926	-0.0197554	0.0442052	0.0731649	0.036403	0.215104	0.0131183	0.0299753	0.0278544	0.0197424	0.0325388	0.0193358	0.0171404	0.141926	0.00854482	-0.0536086
	LaAA	0.04908	0.036209	0.00550214	0.087917	0.0828776	0.0808978	0.172642	0.139007	-0.0142434	-0.0229127	0.00837618	0.0339663	0.0127531	0.0119536	0.00130546	0.0164383	0.0140727	0.00644029	0.018152	0.0126626	0.0083289	0.0763015	-0.00229031	-0.0316894
	LoAP	0.0846245	0.0364438	0.0397133	0.017788	0.0150419	0.0266319	0.0298926	-0.0142434	0.178281	0.0514019	0.0171866	0.0147871	0.00718501	0.110976	0.00830123	0.00319693	0.00181351	0.0056893	-0.00191154	0.010183	0.00227065	-0.0181329	0.00839207	-0.00201835
	LaAP	0.0266843	0.0116306	0.0181644	-0.00445507	-0.00322227	-0.00691395	-0.0197554	-0.0229127	0.0514019	0.0414887	0.00682842	-0.00473129	-0.00208006	0.08119	0.0036486	-0.00217569	-0.0025261	-0.00109442	-0.00610904	0.00684491	-0.00345197	-0.0180165	0.00197005	0.00597923
	LoF	0.0526601	0.0483382	0.0110842	0.0183517	0.0163121	0.00351997	0.0442052	0.00837618	0.0171866	0.00682842	0.0391693	0.0237436	0.00858853	0.0259493	0.00802519	0.00473364	0.00287793	0.00750305	0.00326363	0.0121285	0.00626734	0.0110548	0.00900791	0.00200238
	LoTi	0.0394624	0.0264636	0.00514844	0.0270107	0.021011	0.0192482	0.0731649	0.0339663	0.0147871	-0.00473129	0.0237436	0.0549241	0.0137928	0.0199869	0.0085593	0.00613281	0.00535178	0.00949734	0.012416	0.00885372	0.00836122	0.0200849	0.00628474	-0.0108023
	LaTi	0.0140462	0.0117425	0.00245451	0.0133653	0.00870895	0.00812418	0.036403	0.0127531	0.00718501	-0.00208006	0.00858853	0.0137928	0.009361	0.0162203	0.0044771	0.00296549	0.00153351	0.0027201	0.00433655	0.00246524	0.00350819	0.0072213	0.00180381	-0.00720895
	LoM	0.0786662	0.0284872	0.0208242	0.274199	0.173642	0.122921	0.215104	0.0119536	0.110976	0.08119	0.0259493	0.0199869	0.0162203	0.859355	0.0271028	0.013866	0.0137079	-0.00408565	-0.0129469	-0.00322452	-0.00741031	0.0601783	0.0260846	-0.0501104
	LaM	0.0131454	0.0106601	0.00185825	0.00571545	0.00132128	-0.00289898	0.0131183	0.00130546	0.00830123	0.0036486	0.00802519	0.0085593	0.0044771	0.0271028	0.00645023	0.00105339	0.000341659	-8.32318e-05	0.000125151	0.00332204	0.000275767	-0.00200691	-0.0021531	0.000662434
	DoD	0.019323	0.013356	-0.000251878	0.0292908	0.0286661	0.0314445	0.0299753	0.0164383	0.00319693	-0.00217569	0.00473364	0.00613281	0.00296549	0.013866	0.00105339	0.0094791	0.00536379	0.00162123	0.0034639	0.00075908	9.82348e-05	0.0219362	-0.000701859	-0.011083
	DooD	0.0252444	0.013568	0.00124016	0.0264142	0.0262478	0.0222358	0.0278544	0.0140727	0.00181351	-0.0025261	0.00287793	0.00535178	0.00153351	0.0137079	0.000341659	0.00536379	0.00575464	0.00310088	0.00449889	0.00167962	0.00219442	0.0173973	0.00160652	-0.00683087
	La1T	0.0336852	0.0179861	0.0103594	0.0141823	0.0178407	0.0130011	0.0197424	0.00644029	0.0056893	-0.00109442	0.00750305	0.00949734	0.0027201	-0.00408565	-8.32318e-05	0.00162123	0.00310088	0.0419713	0.0184344	0.00478455	0.00968949	0.00981433	0.0126443	-0.0024939
	La2T	0.0391803	0.0191655	0.00407662	0.0219832	0.0228287	0.0209357	0.0325388	0.018152	-0.00191154	-0.00610904	0.00326363	0.012416	0.00433655	-0.0129469	0.000125151	0.0034639	0.00449889	0.0184344	0.0264	0.00955545	0.00751021	0.0165284	0.00677912	-0.0105426
	La3T	0.0363206	0.0264635	0.0079952	0.00592884	0.00788578	-0.00449045	0.0193358	0.0126626	0.010183	0.00684491	0.0121285	0.00885372	0.00246524	-0.00322452	0.00332204	0.00075908	0.00167962	0.00478455	0.00955545	0.0242683	0.00731447	0.00139757	0.00111633	0.00143266
	La4T	0.0207312	0.0113699	-0.00146078	0.00701095	0.0046571	0.00404303	0.0171404	0.0083289	0.00227065	-0.00345197	0.00626734	0.00836122	0.00350819	-0.00741031	0.000275767	9.82348e-05	0.00219442	0.00968949	0.00751021	0.00731447	0.0305516	0.00112884	0.016676	-0.00695826
	LoYc	0.0541381	0.0490552	0.00355468	0.111004	0.11413	0.0996551	0.141926	0.0763015	-0.0181329	-0.0180165	0.0110548	0.0200849	0.0072213	0.0601783	-0.00200691	0.0219362	0.0173973	0.00981433	0.0165284	0.00139757	0.00112884	0.110062	0.0086965	-0.0341691
	LaYc	0.0174226	0.0101827	0.0085188	0.0157171	0.0138224	0.0107693	0.00854482	-0.00229031	0.00839207	0.00197005	0.00900791	0.00628474	0.00180381	0.0260846	-0.0021531	-0.000701859	0.00160652	0.0126443	0.00677912	0.00111633	0.016676	0.0086965	0.0515837	-0.00531501
	NC	-0.0361509	-0.0161917	0.00240026	-0.057273	-0.0553094	-0.0660815	-0.0536086	-0.0316894	-0.00201835	0.00597923	0.00200238	-0.0108023	-0.00720895	-0.0501104	0.000662434	-0.011083	-0.00683087	-0.0024939	-0.0105426	0.00143266	-0.00695826	-0.0341691	-0.00531501	0.133587
	Total covariance matrix:
		LoCo	LoAb	LoThx	LoT	LaT	LoAn	LoAA	LaAA	LoAP	LaAP	LoF	LoTi	LaTi	LoM	LaM	DoD	DooD	La1T	La2T	La3T	La4T	LoYc	LaYc	NC
	LoCo	0.431524	0.190858	0.0576014	0.134184	0.170242	0.1712	0.161461	0.072245	0.107671	0.0370501	0.0332099	0.0432827	0.00982083	0.0800636	0.0069098	0.0204739	0.0258775	0.0414231	0.0456499	0.0430798	0.0220623	0.068312	0.0124925	-0.057106
	LoAb	0.190858	0.166417	0.0286806	0.0740401	0.0926102	0.0600162	0.109537	0.0418645	0.0396331	0.010137	0.0439169	0.028817	0.0116687	0.0352175	0.00973271	0.0138587	0.0140884	0.018587	0.0216215	0.0276464	0.00986271	0.0552799	0.00787648	-0.0413342
	LoThx	0.0576014	0.0286806	0.0689905	0.00754377	0.0188198	0.00897824	0.0251696	0.0032107	0.0385327	0.0178494	0.00955511	0.00390549	0.00118789	0.0060924	0.000700158	0.0010645	0.00188164	0.0113704	0.00456039	0.0069506	-0.00400406	0.00439261	0.00763169	-0.00157075
	LoT	0.134184	0.0740401	0.00754377	0.230513	0.202067	0.192274	0.223001	0.101175	0.026347	-0.00180973	0.0110943	0.0314673	0.0135065	0.280489	0.00428427	0.0298863	0.0262839	0.0166832	0.0245702	0.00768512	0.00593224	0.116866	0.0129897	-0.0861813
	LaT	0.170242	0.0926102	0.0188198	0.202067	0.227215	0.22453	0.200646	0.109634	0.0380984	0.00651075	-0.0019097	0.0276702	0.0062411	0.179091	-0.00381204	0.0304012	0.0267909	0.025591	0.0293816	0.0135923	0.0043279	0.128026	0.00857746	-0.0936215
	LoAn	0.1712	0.0600162	0.00897824	0.192274	0.22453	0.354205	0.211031	0.145639	0.0817004	0.0182361	-0.0395576	0.0343921	0.00174306	0.13243	-0.0155455	0.036692	0.0241989	0.0328902	0.0363652	0.0086198	0.00299706	0.133766	-0.000799897	-0.149421
	LoAA	0.161461	0.109537	0.0251696	0.223001	0.200646	0.211031	0.469771	0.206083	0.0487057	-0.0130505	0.0313615	0.0845599	0.0391043	0.262158	0.012342	0.0295139	0.0266013	0.0231166	0.0364894	0.0237967	0.0195587	0.152968	0.00499823	-0.106621
	LaAA	0.072245	0.0418645	0.0032107	0.101175	0.109634	0.145639	0.206083	0.16899	0.00916102	-0.0128833	-0.00782021	0.0425902	0.0123393	0.0391618	-0.00211585	0.0171945	0.0139249	0.0129234	0.0236867	0.0183549	0.0101898	0.0894602	-0.00631667	-0.0709799
	LoAP	0.107671	0.0396331	0.0385327	0.026347	0.0380984	0.0817004	0.0487057	0.00916102	0.195172	0.059971	0.00220793	0.0196001	0.00489257	0.118592	0.00395294	0.00413702	0.00220382	0.012169	0.00333355	0.0156215	0.00422506	-0.00629317	0.00488558	-0.0213686
	LaAP	0.0370501	0.010137	0.0178494	-0.00180973	0.00651075	0.0182361	-0.0130505	-0.0128833	0.059971	0.0462603	-0.000244224	-0.00321329	-0.00355657	0.0792985	0.00132126	-0.00163368	-0.00237645	0.00237636	-0.00402888	0.00905562	-0.00229865	-0.0137919	0.000726135	0.0040634
	LoF	0.0332099	0.0439169	0.00955511	0.0110943	-0.0019097	-0.0395576	0.0313615	-0.00782021	0.00220793	-0.000244224	0.0495604	0.0199458	0.0104344	0.0242106	0.0113505	0.00331154	0.00222474	0.00205131	-0.000820608	0.00823464	0.00588294	0.00205921	0.0115802	0.0184995
	LoTi	0.0432827	0.028817	0.00390549	0.0314673	0.0276702	0.0343921	0.0845599	0.0425902	0.0196001	-0.00321329	0.0199458	0.0570882	0.0142456	0.0318181	0.00810575	0.00616462	0.00519685	0.0103849	0.0136123	0.0100337	0.00865927	0.0238034	0.00510074	-0.025923
	LaTi	0.00982083	0.0116687	0.00118789	0.0135065	0.0062411	0.00174306	0.0391043	0.0123393	0.00489257	-0.00355657	0.0104344	0.0142456	0.0103252	0.0227404	0.00546744	0.00250128	0.00123369	0.00142503	0.00361962	0.00190861	0.00368956	0.00625603	0.00216465	-0.00970067
	LoM	0.0800636	0.0352175	0.0060924	0.280489	0.179091	0.13243	0.262158	0.0391618	0.118592	0.0792985	0.0242106	0.0318181	0.0227404	0.922738	0.0306287	0.00970059	0.0113304	-0.00695563	-0.0111067	0.00226884	0.00116637	0.0665804	0.0252205	-0.0833066
	LaM	0.0069098	0.00973271	0.000700158	0.00428427	-0.00381204	-0.0155455	0.012342	-0.00211585	0.00395294	0.00132126	0.0113505	0.00810575	0.00546744	0.0306287	0.00767685	0.000458348	3.23698e-05	-0.00191733	-0.00108358	0.00228648	0.00051124	-0.00430645	-0.00127771	0.00315537
	DoD	0.0204739	0.0138587	0.0010645	0.0298863	0.0304012	0.036692	0.0295139	0.0171945	0.00413702	-0.00163368	0.00331154	0.00616462	0.00250128	0.00970059	0.000458348	0.00989249	0.005512	0.00240301	0.00389441	0.000622524	-0.000884331	0.0226216	-0.00118696	-0.0151804
	DooD	0.0258775	0.0140884	0.00188164	0.0262839	0.0267909	0.0241989	0.0266013	0.0139249	0.00220382	-0.00237645	0.00222474	0.00519685	0.00123369	0.0113304	3.23698e-05	0.005512	0.00580007	0.00338679	0.00472009	0.00169402	0.00172352	0.017688	0.00131413	-0.00843378
	La1T	0.0414231	0.018587	0.0113704	0.0166832	0.025591	0.0328902	0.0231166	0.0129234	0.012169	0.00237636	0.00205131	0.0103849	0.00142503	-0.00695563	-0.00191733	0.00240301	0.00338679	0.0438246	0.0198537	0.00613337	0.00925254	0.0133497	0.0111237	-0.00865284
	La2T	0.0456499	0.0216215	0.00456039	0.0245702	0.0293816	0.0363652	0.0364894	0.0236867	0.00333355	-0.00402888	-0.000820608	0.0136123	0.00361962	-0.0111067	-0.00108358	0.00389441	0.00472009	0.0198537	0.0275871	0.0108347	0.00731318	0.020071	0.00546289	-0.0191201
	La3T	0.0430798	0.0276464	0.0069506	0.00768512	0.0135923	0.0086198	0.0237967	0.0183549	0.0156215	0.00905562	0.00823464	0.0100337	0.00190861	0.00226884	0.00228648	0.000622524	0.00169402	0.00613337	0.0108347	0.0258185	0.00846001	0.00453129	0.000300954	-0.00194328
	La4T	0.0220623	0.00986271	-0.00400406	0.00593224	0.0043279	0.00299706	0.0195587	0.0101898	0.00422506	-0.00229865	0.00588294	0.00865927	0.00368956	0.00116637	0.00051124	-0.000884331	0.00172352	0.00925254	0.00731318	0.00846001	0.0322759	0.000854777	0.016736	-0.000612836
	LoYc	0.068312	0.0552799	0.00439261	0.116866	0.128026	0.133766	0.152968	0.0894602	-0.00629317	-0.0137919	0.00205921	0.0238034	0.00625603	0.0665804	-0.00430645	0.0226216	0.017688	0.0133497	0.020071	0.00453129	0.000854777	0.117052	0.00577523	-0.0582498
	LaYc	0.0124925	0.00787648	0.00763169	0.0129897	0.00857746	-0.000799897	0.00499823	-0.00631667	0.00488558	0.000726135	0.0115802	0.00510074	0.00216465	0.0252205	-0.00127771	-0.00118696	0.00131413	0.0111237	0.00546289	0.000300954	0.016736	0.00577523	0.0514328	0.00236403
	NC	-0.057106	-0.0413342	-0.00157075	-0.0861813	-0.0936215	-0.149421	-0.106621	-0.0709799	-0.0213686	0.0040634	0.0184995	-0.025923	-0.00970067	-0.0833066	0.00315537	-0.0151804	-0.00843378	-0.00865284	-0.0191201	-0.00194328	-0.000612836	-0.0582498	0.00236403	0.238657
	Box test (Chi-square asymptotic approximation)
	The test could not be computed as at least one of the determinants of the within-class covariance matrices is null
	Box test (Fisher's F asymptotic approximation)
	The test could not be computed as at least one of the determinants of the within-class covariance matrices is null
	Kullback's test
	The test could not be computed as at least one of the determinants of the within-class covariance matrices is null
	Mahalanobis distances:
		Ebang	Mbankomo	Messassi	Nkolbissong	Nkometou
	Ebang	0	25.1558	7.73814	19.2811	4.88427
	Mbankomo	25.1558	0	28.0318	6.78908	26.3529
	Messassi	7.73814	28.0318	0	20.3	6.74959
	Nkolbissong	19.2811	6.78908	20.3	0	17.5635
	Nkometou	4.88427	26.3529	6.74959	17.5635	0
	Generalized squared distances:
		Ebang	Mbankomo	Messassi	Nkolbissong	Nkometou
	Ebang	0	25.1558	7.73814	19.2811	4.88427
	Mbankomo	25.1558	0	28.0318	6.78908	26.3529
	Messassi	7.73814	28.0318	0	20.3	6.74959
	Nkolbissong	19.2811	6.78908	20.3	0	17.5635
	Nkometou	4.88427	26.3529	6.74959	17.5635	0
	Fisher distances:
		Ebang	Mbankomo	Messassi	Nkolbissong	Nkometou
	Ebang	0	15.7141	5.25917	7.64097	4.11652
	Mbankomo	15.7141	0	19.6814	2.74162	23.1283
	Messassi	5.25917	19.6814	0	8.64999	6.68314
	Nkolbissong	7.64097	2.74162	8.64999	0	8.51784
	Nkometou	4.11652	23.1283	6.68314	8.51784	0
	p-values for Fisher distances:
		Ebang	Mbankomo	Messassi	Nkolbissong	Nkometou
	Ebang	1	6.10547e-32	2.50167e-11	5.67109e-17	2.10241e-08
	Mbankomo	6.10547e-32	1	1.24912e-37	8.35309e-05	5.71913e-42
	Messassi	2.50167e-11	1.24912e-37	1	3.59663e-19	8.81823e-15
	Nkolbissong	5.67109e-17	8.35309e-05	3.59663e-19	1	6.87767e-19
	Nkometou	2.10241e-08	5.71913e-42	8.81823e-15	6.87767e-19	1
	Eigenvalues:
		F1	F2	F3	F4
	Eigenvalue	4.10154	0.93961	0.583017	0.27016
	Discrimination(%)	69.5845	15.9409	9.89115	4.58339
	Cumulative %(%)	69.5845	85.5255	95.4166	100
	Bartlett's test for eigenvalue significancy:
		F1	F2	F3	F4
	Eigenvalue	4.10154	0.93961	0.583017	0.27016
	Bartlett's statistic	554.739	252.459	129.567	44.3611
	p-value	0	0	2.30657e-10	0.00209905
	Eigenvectors:
		F1	F2	F3	F4
	LoCo	0.0117832	0.0638761	-0.0294549	-0.0011426
	LoAb	-0.0753223	-0.126702	-0.00283787	-0.10827
	LoThx	0.0179205	-0.0718299	0.108276	-0.0940626
	LoT	0.262511	-0.0953183	0.252972	0.109046
	LaT	-0.0425027	0.109732	-0.119042	0.0384868
	LoAn	-0.319221	0.012329	0.0422497	-0.0459122
	LoAA	0.0146254	-0.0115461	0.014614	0.123436
	LaAA	-0.0158317	0.0277169	-0.0718435	0.0500934
	LoAP	0.020446	-0.000243874	-0.0560182	-0.04541
	LaAP	0.0276995	0.0844974	0.256464	0.306888
	LoF	0.168344	0.0313172	-0.0499401	0.0231526
	LoTi	-0.093868	-0.029177	0.0614575	-0.013073
	LaTi	-0.0561554	0.117899	-0.17021	-0.0858571
	LoM	-0.0507065	0.00839983	-0.108426	-0.071011
	LaM	0.0388863	-0.0986924	0.0120054	0.317591
	DoD	0.465131	0.0567638	0.247801	0.151574
	DooD	0.012062	-0.181443	0.0869745	-0.49716
	La1T	-0.0670486	-0.00722205	0.0667644	0.059258
	La2T	0.123647	-0.00201646	-0.0531737	-0.0579501
	La3T	-0.236062	0.0255028	-0.0617156	-0.159584
	La4T	0.00832982	0.135754	-0.108047	-0.0145552
	LoYc	-0.00802131	0.0477818	-0.0916788	-0.145635
	LaYc	0.0375923	-0.0109333	0.0288344	0.0862997
	NC	-0.000858648	0.182449	0.0146599	-0.0372598
	Variables/Factors correlations:
		F1	F2	F3	F4
	LoCo	0.291689	0.0663498	0.0196504	0.214783
	LoAb	0.111844	-0.249187	-0.0923722	0.317911
	LoThx	0.0128612	-0.106217	0.340047	0.143815
	LoT	0.170435	-0.175076	-0.0330556	-0.0837639
	LaT	0.40294	-0.0907838	0.0475851	0.037123
	LoAn	0.759212	-0.0982449	0.202647	-0.0664745
	LoAA	0.238125	-0.163789	-0.262552	-0.368855
	LaAA	0.451698	-0.0856213	-0.166672	-0.274779
	LoAP	0.35497	0.0831106	-0.0188965	-0.0116573
	LaAP	0.32131	0.24196	0.116196	-0.149409
	LoF	-0.518393	-0.0489825	-0.147365	-0.0347735
	LoTi	0.185174	-0.152336	-0.180945	-0.171855
	LaTi	-0.148452	-0.219192	-0.363995	-0.319574
	LoM	0.0788949	-0.0716429	-0.444756	-0.181078
	LaM	-0.370618	-0.132108	-0.359066	-0.219152
	DoD	0.110741	-0.160995	0.323409	0.00862222
	DooD	0.063689	-0.0940896	0.170717	0.21013
	La1T	0.24753	0.0466742	0.173717	0.00789444
	La2T	0.259619	-0.0650229	0.0148109	0.165841
	La3T	0.258452	0.121417	-0.180049	0.16875
	La4T	0.0443183	0.253209	-0.327606	-0.0299623
	LoYc	0.286016	-0.139043	-0.0293304	0.120205
	LaYc	-0.128435	0.0719461	-0.0417749	-0.0578747
	NC	-0.423002	0.789136	0.0847104	0.124125
	Canonical correlations:
	F1	F2	F3	F4
	0.89665	0.696012	0.606873	0.461192
	Canonical discriminant function coefficients:
		F1	F2	F3	F4
	Intercept	-3.51702	-18.6288	-1.85163	-3.33152
	LoCo	-0.164965	0.894265	-0.412368	0.0159964
	LoAb	1.05451	-1.77382	-0.0397302	1.51578
	LoThx	-0.250887	-1.00562	1.51587	1.31688
	LoT	-3.67516	-1.33446	3.5416	-1.52664
	LaT	0.595037	1.53625	-1.66659	-0.538815
	LoAn	4.46909	0.172607	0.591496	0.642771
	LoAA	-0.204756	-0.161646	0.204597	-1.7281
	LaAA	0.221644	0.388037	-1.00581	-0.701307
	LoAP	-0.286244	-0.00341424	-0.784254	0.635739
	LaAP	-0.387793	1.18296	3.59049	-4.29643
	LoF	-2.35682	0.438441	-0.699161	-0.324137
	LoTi	1.31415	-0.408478	0.860405	0.183022
	LaTi	0.786175	1.65059	-2.38295	1.202
	LoM	0.709891	0.117598	-1.51796	0.994153
	LaM	-0.544408	-1.38169	0.168075	-4.44627
	DoD	-6.51184	0.794693	3.46922	-2.12204
	DooD	-0.168868	-2.5402	1.21764	6.96024
	La1T	0.938681	-0.101109	0.934701	-0.829612
	La2T	-1.73105	-0.0282305	-0.744431	0.811302
	La3T	3.30487	0.35704	-0.864019	2.23417
	La4T	-0.116617	1.90056	-1.51266	0.203773
	LoYc	0.112298	0.668945	-1.2835	2.03889
	LaYc	-0.526292	-0.153066	0.403682	-1.2082
	NC	0.0120211	2.55428	0.205239	0.521637
	Standardized canonical discriminant function coefficients:
		F1	F2	F3	F4
	LoCo	-0.104969	0.569027	-0.262393	0.0101786
	LoAb	0.420238	-0.706893	-0.0158331	0.60406
	LoThx	-0.0647932	-0.259708	0.391484	0.340092
	LoT	-1.74632	-0.634093	1.68286	-0.725414
	LaT	0.266375	0.687721	-0.746067	-0.241207
	LoAn	1.92971	0.0745299	0.255403	0.277543
	LoAA	-0.133521	-0.105409	0.133417	-1.12689
	LaAA	0.0826369	0.144674	-0.375002	-0.261473
	LoAP	-0.120862	-0.00144161	-0.331138	0.26843
	LaAP	-0.0789887	0.240955	0.731339	-0.87513
	LoF	-0.466443	0.0867729	-0.138373	-0.0641506
	LoTi	0.307983	-0.0957304	0.201644	0.0428929
	LaTi	0.0760642	0.159698	-0.230555	0.116296
	LoM	0.658079	0.109015	-1.40717	0.921594
	LaM	-0.0437232	-0.110968	0.0134987	-0.357095
	DoD	-0.633997	0.0773718	0.337766	-0.206603
	DooD	-0.0128102	-0.192698	0.0923696	0.527999
	La1T	0.192306	-0.020714	0.191491	-0.169962
	La2T	-0.281263	-0.00458691	-0.120956	0.131821
	La3T	0.514842	0.0556206	-0.134599	0.348045
	La4T	-0.0203836	0.332198	-0.264398	0.0356176
	LoYc	0.0372555	0.221926	-0.425809	0.676414
	LaYc	-0.119532	-0.0347643	0.0916844	-0.274406
	NC	0.00439364	0.933578	0.0750138	0.190656
	Classification functions:
		Ebang	Mbankomo	Messassi	Nkolbissong	Nkometou
	Intercept	-345.926	-347.276	-390.191	-341.063	-341.548
	LoCo	5.876	6.43712	6.95524	5.62691	4.53153
	LoAb	12.3418	7.88389	9.36507	6.36708	14.1504
	LoThx	2.33424	6.35174	3.3644	4.97233	6.55192
	LoT	-40.3963	-19.8582	-38.2196	-17.5939	-34.06
	LaT	15.8732	10.8717	16.0249	10.82	11.5359
	LoAn	41.5291	21.8271	44.2794	26.5854	44.1771
	LoAA	-4.64928	-4.90069	-5.25793	-1.3513	-5.01511
	LaAA	6.12938	3.23946	4.93852	3.92113	3.56755
	LoAP	5.27647	6.06376	4.003	3.63835	3.86933
	LaAP	-1.77447	1.94283	5.58624	13.5756	2.96986
	LoF	-6.46154	3.60341	-7.50471	0.586877	-8.92322
	LoTi	18.5259	13.5101	19.6154	15.6726	20.9618
	LaTi	95.8635	90.4552	95.6046	86.3273	90.8525
	LoM	9.76279	5.16062	7.78804	2.50103	7.20396
	LaM	-52.925	-54.3608	-57.147	-45.4064	-54.1321
	DoD	-12.6079	21.5637	-7.04494	21.0491	-8.5343
	DooD	-23.7928	-16.4568	-24.5378	-29.3961	-16.7317
	La1T	-7.47445	-11.3386	-6.0518	-7.53624	-5.61832
	La2T	20.0811	27.8928	18.5301	23.3524	18.4649
	La3T	-1.0225	-15.8533	-0.255424	-17.2715	-1.05678
	La4T	22.0876	21.4265	23.351	19.0314	18.0485
	LoYc	3.11611	2.75182	2.91816	-2.6937	1.10289
	LaYc	-9.29269	-7.30805	-9.42673	-5.04366	-9.08839
	NC	71.6884	73.3364	77.5451	71.9698	71.0832
	Prior and posterior classification, membership probabilities, scores and squared distances:
	Observation	Prior	Posterior	Pr(Ebang)	Pr(Mbankomo)	Pr(Messassi)	Pr(Nkolbissong)	Pr(Nkometou)	F1	F2	F3	F4	D²(Ebang)	D²(Mbankomo)	D²(Messassi)	D²(Nkolbissong)	D²(Nkometou)
	Obs1	Nkometou	Nkometou	0.00147873	1.40642e-06	0.198537	1.28195e-05	0.79997	1.18231	0.384809	1.97151	1.40583	34.0064	47.9222	24.2069	43.5024	21.4197
	Obs2	Nkometou	Messassi	0.0018372	2.25021e-05	0.499934	0.000268771	0.497938	0.584802	0.893237	1.96237	0.863986	28.2409	37.0457	17.0285	32.0852	17.0365
	Obs3	Nkometou	Messassi	0.00507891	4.52185e-07	0.59588	3.12545e-06	0.399037	1.47808	0.990812	1.17909	1.29099	31.2129	49.8659	21.683	45.9994	22.485
	Obs4	Nkometou	Messassi	0.0106441	1.53425e-07	0.752637	1.80283e-05	0.236701	1.55157	1.1843	0.940856	-0.163593	33.0161	55.3107	24.4989	45.7777	26.8125
	Obs5	Nkometou	Messassi	0.0230557	1.57145e-08	0.570273	2.96841e-06	0.406668	2.09182	0.842689	0.676623	-0.159302	39.3018	67.6995	32.8854	57.2171	33.5616
	Obs6	Nkometou	Nkometou	0.00436626	0.000272301	0.234437	0.00122412	0.759701	0.132342	0.405454	1.66547	0.972573	28.2978	33.8473	20.3312	30.8411	17.9797
	Obs7	Nkometou	Nkometou	0.00588421	9.68239e-07	0.000655198	8.36267e-05	0.993376	0.870228	-2.07495	1.1798	-0.00432263	28.9154	46.34	33.3056	37.4228	18.6578
	Obs8	Nkometou	Nkometou	0.000447885	8.97496e-05	0.000479315	0.00339319	0.99559	-0.181658	-2.04547	2.47655	0.364163	42.2772	45.4922	42.1416	38.2272	26.8641
	Obs9	Nkometou	Nkometou	0.00313457	2.22006e-05	0.384727	0.000376415	0.611739	0.597826	0.683446	1.8016	0.647487	23.5845	33.4848	13.9644	27.8236	13.0369
	Obs10	Nkometou	Messassi	0.00383232	1.35882e-06	0.571948	2.29187e-05	0.424195	1.18984	0.957874	1.47794	0.828911	24.7813	40.6705	14.7701	35.0198	15.3678
	Obs11	Nkometou	Nkometou	0.0449087	7.86303e-08	0.00131807	1.49933e-05	0.953758	1.48839	-1.90797	0.24956	-0.46473	15.88	42.3907	22.9369	31.8895	9.76839
	Obs12	Nkometou	Nkometou	0.0146603	4.04726e-06	0.00103161	2.93624e-06	0.984301	0.866893	-1.8887	0.349431	1.89982	29.8278	46.2175	35.1358	46.8593	21.4142
	Obs13	Nkometou	Nkometou	0.0910479	7.74008e-07	0.0274509	9.52983e-06	0.881491	1.34339	-0.682383	-0.0379496	0.522831	38.3608	61.7114	40.7588	56.6902	33.8203
	Obs14	Nkometou	Ebang	0.5028	7.05135e-06	0.271621	1.90205e-05	0.225553	1.00002	0.607263	-1.13413	0.418246	86.3772	108.727	87.6088	106.742	87.9805
	Obs15	Nkometou	Nkometou	0.0131707	6.97395e-08	0.000738701	9.82431e-07	0.98609	1.56555	-2.04609	0.486497	0.964308	24.0836	48.3811	29.8453	43.0906	15.4521
	Obs16	Nkometou	Nkometou	0.0458349	3.52968e-08	0.00268053	3.02929e-07	0.951484	1.86211	-1.58645	-0.0818018	1.07391	25.7871	53.9406	31.4652	49.6412	19.7211
	Obs17	Nkometou	Nkometou	0.0543089	1.54542e-07	0.00372673	5.60253e-05	0.941908	1.38161	-1.5093	0.345773	-0.832354	16.0594	41.5988	21.4177	29.8126	10.3529
	Obs18	Nkometou	Nkometou	0.0451619	4.34101e-08	0.00315044	1.13473e-06	0.951686	1.77093	-1.53508	0.0694811	0.546357	33.5953	61.3054	38.9207	54.7785	27.4993
	Obs19	Nkometou	Nkometou	0.160419	4.33005e-06	0.0356385	0.00132949	0.802609	0.838479	-0.621583	0.130601	-1.26237	48.983	70.023	51.9917	58.569	45.7629
	Obs20	Nkometou	Nkometou	0.00624868	7.87954e-07	0.000293617	4.74833e-05	0.993409	0.884874	-2.39389	1.03867	0.142942	34.6823	52.6392	40.798	44.4418	24.5448
	Obs21	Nkometou	Nkometou	0.023733	9.88253e-08	0.00171442	0.000192372	0.97436	1.31594	-1.80137	0.833393	-1.42959	53.5848	78.3628	58.8404	63.2152	46.155
	Obs22	Nkometou	Nkometou	0.112731	0.000180651	0.0567096	0.000255878	0.830123	0.326895	-0.367283	-0.0529363	0.920888	18.5979	31.4703	19.972	30.774	14.6047
	Obs23	Nkometou	Nkometou	0.112574	2.79358e-05	0.23957	0.000311863	0.647517	0.685867	0.269169	0.11001	0.154155	19.9102	36.5131	18.3998	31.6878	16.4112
	Obs24	Nkometou	Nkometou	0.0205053	1.86851e-06	0.477769	6.54679e-05	0.501658	1.15757	0.72125	0.846589	0.18465	20.065	38.6716	13.7681	31.5587	13.6705
	Obs25	Nkometou	Nkometou	0.0266104	1.53948e-05	0.000464867	0.00198683	0.970923	0.28982	-2.30197	0.639787	-0.77689	25.5305	40.4405	33.6251	30.72	18.3366
	Obs26	Nkometou	Nkometou	0.016338	1.91778e-07	0.24747	1.61237e-06	0.73619	1.71277	0.363288	0.751727	1.19769	29.6506	52.356	24.215	48.0977	22.0346
	Obs27	Nkometou	Nkometou	0.0258726	4.07115e-08	0.000903126	1.83692e-05	0.973206	1.54363	-2.04255	0.538182	-0.700815	36.1462	62.8706	42.8564	50.6468	28.8914
	Obs28	Nkometou	Nkometou	0.00248607	4.67945e-09	0.0114309	1.31384e-05	0.98607	1.98543	-0.915864	1.9045	-0.789809	65.4412	91.8073	62.39	75.927	53.4751
	Obs29	Nkometou	Nkometou	0.0341661	0.00060252	0.126658	0.0140744	0.824499	-0.070702	-0.0101144	0.921336	-0.252978	31.8897	39.9655	29.2692	33.6635	25.5226
	Obs30	Nkometou	Nkometou	0.00672054	5.8452e-09	0.00271763	1.00706e-07	0.990562	2.14424	-1.48728	0.794554	1.30503	46.1053	74.0154	47.9161	68.3223	36.1191
	Obs31	Nkometou	Nkometou	0.00416627	1.72414e-07	0.00399219	4.02304e-05	0.991801	1.29046	-1.34294	1.50087	-0.152171	32.8038	52.9891	32.8892	42.0841	21.8588
	Obs32	Nkometou	Nkometou	9.44625e-05	1.40662e-10	0.000202801	1.35204e-08	0.999703	2.53154	-2.2894	2.53797	1.59413	53.7943	80.629	52.2662	71.4978	35.2602
	Obs33	Nkometou	Nkometou	0.00328831	1.00029e-09	0.0017528	5.59418e-08	0.994959	2.40964	-1.6332	1.12556	1.06315	31.6321	61.6433	32.8904	53.5952	20.2074
	Obs34	Nkometou	Nkometou	0.0161254	2.19791e-06	0.00271771	3.29947e-05	0.981122	0.909099	-1.54283	0.679791	0.581722	55.3638	73.1651	58.925	67.7474	47.1472
	Obs35	Nkometou	Nkometou	0.0148194	7.31398e-05	0.00936244	0.00226511	0.97348	0.191999	-1.05605	1.07275	-0.0620918	49.4738	60.0964	50.3922	53.2304	41.1039
	Obs36	Nkometou	Nkometou	0.000900052	2.27825e-10	0.000651742	3.38685e-07	0.998448	2.45022	-1.99019	1.92121	-0.0938989	30.4309	60.8096	31.0765	46.2011	16.4079
	Obs37	Nkometou	Nkometou	0.00937637	1.82642e-08	0.00907511	1.41331e-05	0.981534	1.79444	-1.0709	1.20692	-0.591589	22.7049	49.0024	22.7702	35.6998	13.4031
	Obs38	Nkometou	Nkometou	0.0242068	9.40111e-09	0.0194484	8.83301e-07	0.956344	2.12536	-0.787407	0.562137	0.299362	25.1146	54.6372	25.5523	45.5515	17.7616
	Obs39	Nkometou	Nkometou	0.00744778	7.51516e-09	0.00555833	3.4793e-07	0.986994	2.08861	-1.21917	0.923642	0.828532	29.6016	57.2147	30.1869	49.5445	19.8281
	Obs40	Nkometou	Nkometou	0.283392	5.13996e-05	0.185028	0.000739829	0.530788	0.539162	0.175043	-0.339154	-0.256958	23.5665	40.7964	24.4191	35.4628	22.3114
	Obs41	Nkometou	Messassi	0.105968	1.13394e-06	0.760166	3.25081e-05	0.133832	1.21807	1.25999	-0.34699	-0.288618	28.6008	51.4912	24.66	44.7796	28.1339
	Obs42	Nkometou	Ebang	0.81813	1.79917e-06	0.00869362	0.000181919	0.172993	0.884415	-0.746039	-1.39436	-1.39596	52.3418	78.3967	61.4307	69.1642	55.4494
	Obs43	Nkometou	Ebang	0.870393	3.59069e-06	0.0011434	8.83698e-05	0.128372	0.648882	-1.44154	-1.79994	-0.977359	15.3461	40.1428	28.616	33.7364	19.1741
	Obs44	Nkometou	Ebang	0.757087	0.00138246	0.000193735	0.00424065	0.237097	-0.572901	-2.33251	-1.59835	-0.526379	34.1352	46.7464	50.6767	44.5047	36.4572
	Obs45	Nkometou	Ebang	0.630581	9.89857e-07	0.21147	3.21299e-05	0.157916	1.2493	0.587479	-1.20458	-0.665449	67.4846	94.2138	69.6697	87.2538	70.2538
	Obs46	Nkometou	Nkometou	0.0102036	0.000118571	0.00245992	0.00285399	0.984364	0.00399641	-1.56848	1.13798	0.0256952	32.2338	41.1437	35.079	34.7818	23.0953
	Obs47	Nkometou	Nkometou	0.0564996	5.45615e-11	0.0450697	1.00759e-06	0.89843	3.04447	-0.537427	0.530572	-1.73968	60.4842	102	60.9362	82.353	54.9513
	Obs48	Nkometou	Nkometou	0.0152089	3.91471e-13	0.00612235	3.48036e-09	0.978669	3.97685	-1.2688	0.667533	-0.693465	41.2556	90.0216	43.0755	71.8361	32.927
	Obs49	Nkometou	Nkometou	0.0403175	1.02795e-07	0.0227703	1.72035e-05	0.936895	1.60926	-0.758231	0.519807	-0.312077	45.3353	71.0944	46.478	60.8542	39.0437
	Obs50	Nkometou	Nkometou	0.0280637	6.72585e-08	0.097885	0.000501574	0.87355	1.57786	-0.177156	1.16965	-1.9187	60.3974	86.2803	57.8988	68.4464	53.5213
	Obs51	Nkometou	Nkometou	0.0290545	1.89395e-08	0.00898727	1.74627e-05	0.961941	1.81894	-1.13674	0.702894	-0.889966	44.9108	73.3976	47.2575	59.7445	37.9112
	Obs52	Nkometou	Nkometou	0.00499759	1.14348e-05	0.00165721	2.40783e-05	0.99331	0.578488	-1.6539	1.05163	1.51621	47.2914	59.4515	49.499	57.9622	36.7072
	Obs53	Nkometou	Nkometou	0.0179119	6.41452e-07	0.00983091	6.95136e-05	0.972187	1.15755	-1.05537	0.882814	-0.176179	43.0723	63.5468	44.2722	54.1757	35.0842
	Obs54	Nkometou	Nkometou	0.000517153	0.00163711	0.000442329	0.0122971	0.985106	-0.725077	-2.06713	2.37415	0.773375	60.373	58.0683	60.6855	54.0354	45.2686
	Obs55	Nkometou	Nkometou	0.000991524	1.21248e-09	0.00169525	3.63184e-06	0.99731	2.11874	-1.62534	2.11452	-0.576142	67.3242	94.5529	66.2516	78.5433	53.4971
	Obs56	Nkometou	Nkometou	0.0398122	1.82035e-08	0.0535883	6.97605e-07	0.906599	2.10523	-0.384571	0.33427	0.576573	34.9004	64.0965	34.3061	56.8044	28.6493
	Obs57	Nkometou	Ebang	0.876035	8.81929e-07	0.0956957	7.27111e-07	0.028268	1.22746	0.878815	-2.38503	0.519813	27.8208	55.4384	32.2492	55.8244	34.6881
	Obs58	Nkometou	Nkometou	0.00459508	1.71592e-06	0.00308144	2.11386e-05	0.992301	0.932547	-1.41987	1.23384	0.937633	33.3969	49.1825	34.1961	44.1602	22.6468
	Obs59	Nkometou	Ebang	0.536218	0.000191	0.00498906	0.010115	0.448487	-0.0290669	-1.26411	-0.765334	-1.29009	21.224	37.104	30.5786	29.165	21.5813
	Obs60	Nkometou	Nkometou	0.00269272	2.17199e-09	0.00492954	1.17938e-08	0.992378	2.41723	-1.18107	1.08503	2.13333	40.2414	68.3022	39.032	64.9183	28.4222
	Obs61	Nkometou	Ebang	0.554509	0.000273057	0.384272	0.000519049	0.0604263	0.107332	1.18425	-1.43215	-0.141979	16.6378	31.8701	17.3712	30.5854	21.0711
	Obs62	Nkometou	Nkometou	0.0291348	2.17535e-09	0.015232	1.07559e-07	0.955633	2.46438	-0.885511	0.31289	0.706524	27.9062	60.7267	29.2033	52.925	20.9253
	Obs63	Nkometou	Ebang	0.737594	2.20086e-07	0.000372839	2.03867e-07	0.262032	1.41942	-2.07604	-2.07973	1.00049	23.8413	53.8911	39.0213	54.0442	25.9112
	Obs64	Nkometou	Nkometou	0.00157911	1.2612e-09	0.000813777	1.16615e-07	0.997607	2.25817	-1.90332	1.46741	0.913842	32.9222	61.0029	34.2481	51.9492	20.0252
	Obs65	Nkometou	Nkometou	0.160196	4.4455e-08	0.000736747	4.99147e-07	0.839067	1.75266	-2.13621	-0.757471	0.615798	19.8086	50.0035	30.5724	45.1666	16.4968
	Obs66	Nkometou	Nkometou	0.00578063	8.0676e-08	0.00851895	1.50047e-05	0.985685	1.52467	-1.05399	1.34587	-0.00138957	30.1547	52.5139	29.3792	42.0625	19.8771
	Obs67	Nkometou	Nkometou	0.436522	1.30384e-05	0.00165377	0.000167184	0.561644	0.5683	-1.74716	-0.977335	-0.298766	14.6047	35.4421	25.7563	30.3397	14.1007
	Obs68	Nkometou	Nkometou	0.0140428	4.16849e-09	0.00568823	9.99184e-07	0.980268	2.15769	-1.26407	0.781422	0.0132553	19.3386	49.3988	21.146	38.44	10.8472
	Obs69	Nkometou	Ebang	0.951914	6.56291e-06	0.00221291	1.63691e-05	0.0458504	0.562635	-0.808259	-2.3423	-0.234989	17.8055	41.5751	29.9338	39.7472	23.8717
	Obs70	Nkometou	Nkometou	0.00759618	1.76591e-08	0.00905282	6.66386e-06	0.983344	1.8298	-1.05134	1.22395	-0.217155	20.2119	46.1557	19.861	34.2893	10.4852
	Obs71	Nkometou	Messassi	0.190967	6.84351e-05	0.554797	0.000113045	0.254054	0.556516	0.911332	-0.532116	0.640417	21.9839	37.8518	19.8509	36.848	21.413
	Obs72	Nkometou	Nkometou	0.0176113	6.61972e-08	0.0177381	2.00257e-06	0.964648	1.74571	-0.797485	0.68011	0.675039	17.6723	42.6551	17.6579	35.836	9.66581
	Obs73	Nkometou	Nkometou	0.143822	2.42925e-06	0.0422153	1.15709e-05	0.813949	1.18106	-0.500904	-0.283433	0.752956	30.9418	52.9193	33.3934	49.7975	27.4752
	Obs74	Nkometou	Nkometou	0.0153224	3.15816e-08	0.0204381	6.18611e-07	0.964239	1.93018	-0.726251	0.66985	0.984399	27.9355	54.12	27.3593	48.1702	19.6514
	Obs75	Nkometou	Mbankomo	1.41039e-06	0.993846	4.20398e-07	0.00615038	1.5454e-06	-3.92747	0.104658	-0.287302	0.838575	33.8934	6.96249	36.3143	17.1326	33.7106
	Obs76	Ebang	Messassi	0.14826	2.19632e-05	0.6864	5.6839e-05	0.16526	0.732852	1.15288	-0.54925	0.498467	19.5971	37.2318	16.5321	35.3301	19.38
	Obs77	Ebang	Ebang	0.943472	7.73619e-06	0.00191797	1.96688e-05	0.054583	0.536808	-0.924243	-2.28217	-0.220798	17.9582	41.381	30.3548	39.5148	23.6579
	Obs78	Ebang	Ebang	0.736338	3.77943e-06	0.00214732	0.000114155	0.261396	0.741165	-1.42356	-1.416	-0.84392	11.5071	35.8668	23.182	29.0508	13.5784
	Obs79	Ebang	Nkometou	0.455574	2.23702e-08	0.00113413	5.99961e-07	0.543292	1.8747	-1.88822	-1.28396	-0.000331347	13.2254	46.884	25.2167	40.3058	12.8732
	Obs80	Ebang	Ebang	0.673653	2.68266e-07	0.000219694	2.82537e-07	0.326127	1.35862	-2.35751	-1.98484	0.972727	23.1865	52.659	39.2429	52.5553	24.6373
	Obs81	Ebang	Ebang	0.581429	0.000390861	0.368957	0.000505321	0.0487177	0.0245124	1.24226	-1.55093	-0.0661642	17.3519	31.9617	18.2615	31.448	22.3108
	Obs82	Ebang	Ebang	0.723004	0.000314211	0.00666086	0.0085422	0.261479	-0.134003	-0.97657	-1.10221	-1.21481	20.8281	36.3103	30.2025	29.7049	22.8623
	Obs83	Ebang	Messassi	0.356839	0.000198096	0.618762	0.000594644	0.0236062	0.0591418	1.71314	-1.4663	-0.457707	24.6995	39.6921	23.5986	37.4936	30.131
	Obs84	Ebang	Messassi	0.289963	0.0326104	0.509806	0.0176994	0.149922	-0.762237	1.0357	-0.707174	0.29322	28.5833	32.9536	27.4548	34.1758	29.9026
	Obs85	Ebang	Messassi	0.447778	4.12718e-06	0.502958	1.592e-06	0.0492583	1.07462	1.399	-1.76765	1.03335	21.8901	45.079	21.6577	46.9842	26.3045
	Obs86	Ebang	Ebang	0.554207	3.72564e-05	0.000661454	4.81422e-05	0.445046	0.383988	-2.02161	-1.43108	0.514575	23.3838	42.5987	36.8455	42.086	23.8225
	Obs87	Ebang	Ebang	0.824264	1.5557e-09	0.000586403	2.12203e-08	0.17515	2.3354	-1.79091	-2.18768	0.173254	28.7234	68.8995	43.2198	63.6734	31.8211
	Obs88	Ebang	Ebang	0.907738	3.24324e-06	0.000459359	7.14683e-05	0.091728	0.582803	-1.69243	-2.01887	-1.0418	16.9101	41.9944	32.0878	35.809	21.4943
	Obs89	Ebang	Nkometou	0.41593	2.34538e-07	0.0137609	3.10568e-05	0.570278	1.44675	-0.926904	-0.733625	-0.863968	14.1571	42.9339	20.9745	33.162	13.5259
	Obs90	Ebang	Nkometou	0.0896526	3.57651e-06	0.0224214	2.31648e-05	0.887899	1.03427	-0.75913	-0.0359908	0.655865	31.8911	52.1497	34.6629	48.4132	27.3052
	Obs91	Ebang	Messassi	0.121323	3.13271e-05	0.772445	0.000159635	0.106041	0.57146	1.35315	-0.501227	0.0774445	20.6865	37.21	16.9843	33.9532	20.9558
	Obs92	Ebang	Ebang	0.920089	2.42191e-05	0.00249291	0.000127767	0.0772661	0.309421	-0.946393	-1.9985	-0.576044	19.0926	40.1828	30.9146	36.8566	24.047
	Obs93	Ebang	Ebang	0.841681	1.18806e-05	0.0013578	7.96091e-05	0.15687	0.489472	-1.42487	-1.78538	-0.439043	10.4449	32.7814	23.3039	28.9769	13.8048
	Obs94	Ebang	Nkometou	0.416929	1.10033e-07	0.000594238	3.3787e-05	0.582443	1.37308	-2.19628	-0.92578	-1.28411	37.6632	67.9585	50.77	56.5044	36.9946
	Obs95	Ebang	Ebang	0.608823	8.7767e-07	0.000255691	1.75728e-06	0.390919	1.09742	-2.36195	-1.73673	0.621254	23.8685	50.7681	39.4192	49.3796	24.7546
	Obs96	Ebang	Nkometou	0.350819	3.45713e-07	0.00356682	6.47116e-05	0.645549	1.26888	-1.502	-0.665388	-1.05191	12.801	40.4614	21.9782	29.9972	11.5814
	Obs97	Ebang	Ebang	0.497955	1.55555e-07	0.0199056	3.81707e-07	0.482139	1.74746	-0.684436	-1.29562	0.959901	22.7982	52.7562	29.2372	50.9609	22.8628
	Obs98	Ebang	Ebang	0.496075	1.95419e-07	0.0314125	1.70037e-06	0.472511	1.66057	-0.511187	-1.11493	0.363581	18.0701	47.5643	23.5892	43.2374	18.1675
	Obs99	Ebang	Ebang	0.78946	2.98687e-08	0.0557435	9.8067e-07	0.154796	1.92466	0.0544613	-1.59836	-0.398288	22.8709	57.051	28.172	50.0681	26.1294
	Obs100	Ebang	Ebang	0.65387	2.35741e-07	0.0455663	7.2027e-05	0.300492	1.42315	-0.26947	-0.9634	-1.45146	12.389	42.0604	17.7165	30.6162	13.944
	Obs101	Ebang	Messassi	0.0263716	2.00827e-06	0.95742	0.00129467	0.0149117	0.648998	2.13775	-0.0415466	-2.07594	45.156	64.1216	37.9721	51.1841	46.2963
	Obs102	Ebang	Messassi	0.047199	1.75304e-08	0.944359	1.58149e-07	0.00844147	1.84128	2.3495	-1.20148	0.143657	18.1491	47.761	12.1568	43.3618	21.5915
	Obs103	Ebang	Messassi	0.0872897	6.12643e-10	0.911693	3.0078e-09	0.00101773	2.37473	3.02753	-2.41465	0.129219	34.516	72.0654	29.8238	68.883	43.4193
	Obs104	Ebang	Messassi	0.300015	1.40745e-07	0.672287	2.16652e-05	0.0276764	1.43576	1.66571	-1.27219	-1.43936	56.9542	86.0989	55.3405	76.0259	61.7207
	Obs105	Ebang	Ebang	0.99974	4.66235e-11	3.51124e-05	5.15756e-09	0.000224881	2.05939	-0.69233	-4.62763	-2.24394	72.4199	119.997	92.9333	110.585	89.2193
	Obs106	Ebang	Ebang	0.99715	0.00011925	0.00018147	0.000470122	0.00207888	-0.589911	-0.77146	-3.37513	-1.63266	99.3722	117.435	116.595	114.692	111.718
	Obs107	Ebang	Ebang	0.999797	2.78038e-11	3.17413e-05	4.95018e-11	0.000171225	2.34179	-0.589422	-5.19972	-0.354423	71.5955	120.207	92.3109	119.053	88.9402
	Obs108	Ebang	Mbankomo	0.0431885	0.901959	0.000379249	0.010901	0.0435719	-1.9489	-1.26533	-1.05685	1.47461	80.8019	74.7239	90.2722	83.5553	80.7842
	Obs109	Mbankomo	Mbankomo	0.00655815	0.989035	3.28106e-05	0.00188461	0.00248949	-2.42694	-1.13947	-1.52032	1.85282	85.6799	75.6479	96.2754	88.1739	87.6172
	Obs110	Mbankomo	Mbankomo	0.0637658	0.920969	0.0133351	0.000191268	0.00173833	-1.8763	1.27064	-2.44393	2.5969	50.5965	45.2561	53.7261	62.2151	57.8011
	Obs111	Mbankomo	Mbankomo	1.97651e-08	0.998962	2.0648e-09	0.00103794	1.12263e-08	-4.89636	-0.0758608	-0.560388	1.00923	52.0622	16.5856	56.58	30.3246	53.1936
	Obs112	Mbankomo	Mbankomo	9.14682e-08	0.998689	7.63537e-09	0.00131043	3.03167e-08	-4.65383	0.0164191	-0.807386	0.91836	52.3254	19.9135	57.2918	33.1856	54.534
	Obs113	Mbankomo	Mbankomo	1.84535e-08	0.999488	4.14296e-10	0.000512086	2.95571e-09	-5.11542	-0.252168	-1.1697	0.952497	59.8069	24.1919	67.3998	39.3449	63.4699
	Obs114	Mbankomo	Mbankomo	0.00434687	0.870941	0.0010607	0.120935	0.00271589	-2.40498	0.189462	-0.56729	0.110852	46.0122	35.412	48.8333	39.3606	46.9529
	Obs115	Mbankomo	Mbankomo	2.62978e-07	0.989602	1.43562e-07	0.0103967	5.18934e-07	-4.20981	0.137947	0.0964282	0.588674	35.6447	5.36326	36.8554	14.4749	34.2853
	Obs116	Mbankomo	Mbankomo	2.71378e-06	0.986183	6.0361e-07	0.0138103	3.4572e-06	-3.82749	-0.071989	-0.206653	0.558129	40.9692	15.3627	43.9756	23.8996	40.485
	Obs117	Mbankomo	Mbankomo	1.42057e-06	0.990263	5.57272e-07	0.0097331	1.70666e-06	-3.92088	0.177429	-0.185641	0.659345	31.6962	4.78691	33.5678	14.0318	31.3293
	Obs118	Mbankomo	Mbankomo	9.14001e-07	0.99111	4.90464e-07	0.00888775	1.19082e-06	-3.98247	0.275365	-0.1215	0.687282	34.7358	6.94277	35.9807	16.3711	34.2067
	Obs119	Mbankomo	Mbankomo	7.28019e-07	0.977239	2.34254e-07	0.0227551	4.75171e-06	-3.92552	-0.485713	0.47865	0.61162	42.4253	14.2054	44.6931	21.7253	38.6734
	Obs120	Mbankomo	Mbankomo	0.000226612	0.936787	3.73374e-05	0.0625247	0.000424782	-2.91866	-0.334549	-0.164188	0.393707	55.5005	38.8466	59.107	44.2604	54.2439
	Obs121	Mbankomo	Mbankomo	1.24107e-05	0.996168	4.73181e-07	0.0038162	2.73019e-06	-3.74701	-0.162979	-1.13912	0.807577	66.2621	43.6759	72.7958	54.8052	69.2905
	Obs122	Mbankomo	Nkolbissong	7.45284e-06	0.0685994	1.46422e-05	0.93137	8.50766e-06	-3.26056	0.755854	0.489723	-2.17964	46.863	28.6081	45.5124	23.3914	46.5983
	Obs123	Mbankomo	Nkolbissong	1.86525e-07	0.0293308	9.9758e-07	0.970662	5.93537e-06	-3.47534	0.014113	1.89877	-2.01321	62.5922	38.6611	59.2387	31.6624	55.672
	Obs124	Mbankomo	Nkolbissong	9.57003e-07	0.0430143	2.39631e-06	0.956972	9.94149e-06	-3.36056	0.0969895	1.36529	-2.0085	55.2125	33.7861	53.3768	27.5816	50.5312
	Obs125	Mbankomo	Mbankomo	1.00209e-06	0.992121	5.44121e-07	0.00787587	1.29085e-06	-3.9573	0.285531	-0.142168	0.750733	35.0616	7.45055	36.2829	17.1226	34.5552
	Obs126	Mbankomo	Mbankomo	1.03815e-06	0.990271	5.01235e-07	0.00972571	1.4157e-06	-3.96092	0.21689	-0.111712	0.666355	33.4938	5.95724	34.9501	15.2036	32.8735
	Obs127	Mbankomo	Mbankomo	9.6582e-06	0.984062	4.71042e-06	0.0159054	1.83965e-05	-3.46652	0.105164	-0.062251	0.756037	29.2477	6.18442	30.6838	14.4345	27.959
	Obs128	Mbankomo	Mbankomo	9.38584e-07	0.99186	5.23674e-07	0.00813722	1.22781e-06	-3.96954	0.290654	-0.128053	0.733564	35.9269	8.18547	37.0939	17.7917	35.3897
	Obs129	Mbankomo	Mbankomo	1.16437e-06	0.992081	4.29987e-07	0.00791605	1.34621e-06	-3.96165	0.168548	-0.215347	0.722645	32.0942	4.78344	34.0866	14.4453	31.804
	Obs130	Mbankomo	Mbankomo	1.66179e-06	0.990392	6.37163e-07	0.00960414	2.00335e-06	-3.88754	0.167545	-0.195829	0.68207	31.3279	4.73201	33.2452	14.0038	30.9541
	Obs131	Mbankomo	Mbankomo	3.99131e-09	0.989565	2.22933e-09	0.0104347	2.67983e-07	-4.70857	-1.05272	1.46537	1.03726	79.8177	41.1604	80.9826	50.2647	71.4041
	Obs132	Mbankomo	Mbankomo	8.05343e-07	0.991628	4.63439e-07	0.00836981	1.07886e-06	-3.99921	0.294358	-0.106902	0.711503	36.6852	8.63803	37.7904	18.1875	36.1004
	Obs133	Mbankomo	Mbankomo	6.83631e-07	0.994166	3.54836e-07	0.00583257	8.03775e-07	-4.0379	0.30154	-0.188731	0.825316	38.2651	9.88512	39.5766	20.162	37.9413
	Obs134	Mbankomo	Mbankomo	2.21385e-05	0.98539	2.60304e-06	0.0145648	2.02829e-05	-3.45598	-0.212134	-0.466888	0.647255	62.4906	41.0837	66.7719	49.5125	62.6657
	Obs135	Mbankomo	Mbankomo	2.71667e-06	0.987279	6.36291e-07	0.0127139	3.34998e-06	-3.82374	-0.039349	-0.222275	0.590542	37.26	11.6534	40.1631	20.358	36.841
	Obs136	Mbankomo	Mbankomo	1.00819e-05	0.977403	8.62957e-07	0.0225766	9.19568e-06	-3.66627	-0.343818	-0.405281	0.346311	73.1245	50.1607	78.0408	57.6967	73.3085
	Obs137	Mbankomo	Mbankomo	2.57678e-06	0.988382	6.80541e-07	0.0116114	3.11055e-06	-3.82562	0.0167776	-0.226862	0.626355	34.8951	9.18054	37.5579	18.0687	34.5186
	Obs138	Mbankomo	Mbankomo	1.35396e-06	0.991029	6.1535e-07	0.00896764	1.68467e-06	-3.91402	0.225179	-0.168936	0.70669	32.2555	5.24861	33.8327	14.6588	31.8185
	Obs139	Mbankomo	Mbankomo	1.89227e-06	0.990342	6.7933e-07	0.00965351	2.31597e-06	-3.86226	0.136321	-0.20223	0.694724	31.2014	4.86533	33.2502	14.1268	30.7973
	Obs140	Mbankomo	Mbankomo	1.37272e-06	0.990659	5.58763e-07	0.00933709	1.6952e-06	-3.92078	0.183301	-0.176481	0.683384	31.7343	4.7556	33.5319	14.0844	31.3123
	Obs141	Mbankomo	Mbankomo	1.46594e-06	0.990855	6.14896e-07	0.00914159	1.79996e-06	-3.90439	0.197572	-0.181639	0.699799	31.6872	4.83958	33.4248	14.211	31.2767
	Obs142	Mbankomo	Mbankomo	8.13464e-07	0.992196	5.17599e-07	0.00780139	1.06292e-06	-3.99014	0.34374	-0.115218	0.742676	39.04	11.0118	39.9442	20.703	38.5051
	Obs143	Mbankomo	Mbankomo	1.00788e-06	0.991789	5.12107e-07	0.00820843	1.28329e-06	-3.96357	0.262493	-0.147043	0.726727	34.5003	6.90146	35.8544	16.4902	34.0171
	Obs144	Nkolbissong	Mbankomo	1.41039e-06	0.993846	4.20398e-07	0.00615038	1.5454e-06	-3.92747	0.104658	-0.287302	0.838575	33.8934	6.96249	36.3143	17.1326	33.7106
	Obs145	Nkolbissong	Mbankomo	1.59644e-06	0.992325	6.37087e-07	0.00767095	1.8092e-06	-3.88966	0.2071	-0.235302	0.768263	31.2697	4.58961	33.1069	14.3148	31.0194
	Obs146	Nkolbissong	Mbankomo	9.75584e-11	0.969049	6.74789e-11	0.0309509	2.09957e-09	-5.67397	-0.60151	1.42023	-0.141862	71.1295	25.0912	71.8668	31.9791	64.9914
	Obs147	Nkolbissong	Mbankomo	5.47388e-07	0.99279	3.81294e-07	0.00720787	7.57345e-07	-4.05928	0.360852	-0.0776495	0.755564	42.9229	14.1012	43.6461	23.9519	42.2736
	Obs148	Nkolbissong	Messassi	0.381812	0.000951463	0.407219	0.189241	0.0207762	-0.528081	1.53224	-1.03645	-2.62018	39.3281	51.3175	39.1992	40.7319	45.1503
	Obs149	Nkolbissong	Nkolbissong	0.0692378	6.0644e-05	0.00492592	0.761245	0.164531	-0.252897	-0.874023	0.377948	-3.57239	41.6911	55.7716	46.9771	36.8962	39.96
	Obs150	Nkolbissong	Nkolbissong	4.66974e-06	0.0606133	1.05094e-08	0.939373	9.11132e-06	-3.70364	-2.12799	0.156912	-2.39172	52.7146	33.7723	64.9078	28.2909	51.3778
	Obs151	Nkolbissong	Nkolbissong	2.19942e-05	0.0810478	4.37414e-08	0.918848	8.22939e-05	-3.35088	-2.39191	0.261262	-1.95523	46.511	30.087	58.9515	25.2308	43.872
	Obs152	Nkolbissong	Nkolbissong	1.78104e-07	0.0048001	2.05805e-06	0.995184	1.41331e-05	-3.03677	-0.00751328	2.36759	-2.41653	83.2105	62.807	78.3162	52.1384	74.4627
	Obs153	Nkolbissong	Nkolbissong	7.75544e-05	0.00028727	0.000973776	0.996325	0.00233682	-1.37159	0.332441	1.90822	-3.02427	63.5664	60.9476	58.506	44.6447	56.7553
	Obs154	Nkolbissong	Nkolbissong	3.97684e-08	0.000766654	3.11352e-07	0.999231	1.87422e-06	-3.14106	-0.0082687	2.34886	-3.37644	86.6571	66.9236	82.5414	52.5782	78.9513
	Obs155	Nkolbissong	Nkolbissong	2.20385e-06	0.0287002	4.21634e-06	0.971284	9.37613e-06	-3.23355	0.288508	1.03432	-2.30718	43.0889	24.14	41.7914	17.0966	40.193
	Obs156	Nkolbissong	Nkolbissong	7.06365e-06	0.00505787	5.26351e-05	0.99485	3.22117e-05	-2.60577	0.790194	1.20791	-2.74756	40.4784	27.3309	36.4615	16.7676	37.4436
	Obs157	Nkolbissong	Nkolbissong	2.18296e-06	0.0235588	3.35674e-05	0.976389	1.59962e-05	-3.01135	0.933414	1.39046	-2.16694	41.3592	22.786	35.8934	15.3373	37.3758
	Obs158	Nkolbissong	Messassi	0.0172118	0.000164993	0.594644	0.00137475	0.386604	0.243832	0.917666	0.932663	0.351679	25.389	34.6839	18.3043	30.4437	19.1654
	Obs159	Nkolbissong	Nkometou	0.0259532	1.09717e-06	0.00211928	0.000147329	0.971779	0.949769	-1.69236	0.641434	-0.456672	26.9705	47.1131	31.9809	37.3132	19.7248
	Obs160	Messassi	Messassi	0.384026	2.72738e-06	0.487598	0.000510883	0.127863	0.951779	0.998426	-0.737675	-1.51293	26.988	50.6982	26.5104	40.2326	29.1875
	Obs161	Messassi	Messassi	0.00697348	6.30924e-07	0.65925	6.81029e-06	0.333769	1.38233	1.06696	1.04922	0.950358	30.3436	48.9645	21.2456	44.2065	22.607
	Obs162	Messassi	Messassi	0.00430655	2.86515e-05	0.948697	0.000192841	0.0467751	0.366455	1.90539	0.801121	0.373805	24.5019	34.5273	13.712	30.714	19.7315
	Obs163	Messassi	Messassi	0.0059473	5.58542e-08	0.921228	6.08833e-07	0.0728239	1.74501	1.72842	0.528276	0.85834	26.8492	50.0006	16.7636	45.223	21.839
	Obs164	Messassi	Messassi	0.0115374	7.43225e-08	0.929934	5.80655e-06	0.0585229	1.58571	1.74277	0.382922	-0.258356	32.3792	56.2846	23.6001	47.5679	29.1315
	Obs165	Messassi	Messassi	0.0440015	2.41445e-09	0.915071	5.22831e-07	0.0409265	2.28169	1.77131	-0.412639	-0.70621	41.4611	74.8977	35.3916	64.1421	41.606
	Obs166	Messassi	Messassi	0.015394	0.000109233	0.847533	0.000506924	0.136457	0.261611	1.42564	0.587128	0.436337	23.6524	33.549	15.6357	30.4792	19.2884
	Obs167	Messassi	Messassi	0.029915	2.40357e-06	0.922657	7.02319e-05	0.0473557	0.90041	1.76188	-0.0515558	-0.398554	28.8616	47.7199	22.0038	40.9702	27.943
	Obs168	Messassi	Messassi	0.00103201	0.000403035	0.713164	0.00310311	0.282298	-0.0782118	1.26186	2.16939	0.73958	37.9647	39.8451	24.8882	35.7629	26.7417
	Obs169	Messassi	Messassi	0.00669344	1.61472e-05	0.841719	0.00022785	0.151344	0.595439	1.42628	1.02435	0.302728	20.9584	33.0127	11.2898	27.7188	14.7215
	Obs170	Messassi	Messassi	0.00461265	4.38616e-07	0.921309	5.82305e-06	0.0740724	1.28392	1.73217	0.777146	0.60164	23.1833	41.7047	12.5894	36.5328	17.6309
	Obs171	Messassi	Messassi	0.092934	2.62876e-07	0.828615	8.69668e-06	0.0784419	1.46478	1.48333	-0.513908	-0.308522	12.1438	37.6952	7.76804	30.6972	12.4828
	Obs172	Messassi	Messassi	0.00572596	1.28064e-07	0.928451	3.11971e-07	0.0658227	1.62977	1.78492	0.393012	1.44512	44.8178	66.2338	34.6408	64.453	39.9339
	Obs173	Messassi	Nkometou	0.0204648	2.25632e-07	0.339805	1.62923e-06	0.639728	1.69815	0.525589	0.619873	1.18572	45.302	68.1326	39.6826	64.1787	38.4173
	Obs174	Messassi	Messassi	0.10629	3.54647e-05	0.785611	2.69652e-05	0.108037	0.638864	1.38429	-0.633513	0.97296	81.7583	97.7691	77.7578	98.3171	81.7257
	Obs175	Messassi	Messassi	0.0298636	1.61376e-07	0.916169	2.51173e-07	0.0539673	1.64363	1.75463	-0.465537	1.2732	20.3848	44.6416	13.5377	43.7568	19.2013
	Obs176	Messassi	Messassi	0.0620934	2.85268e-08	0.83827	6.17479e-08	0.0996363	2.09221	1.46723	-0.660284	1.3197	20.1214	49.308	14.916	47.7636	19.1756
	Obs177	Messassi	Messassi	0.0379455	1.16771e-06	0.935179	8.31609e-06	0.0268661	1.07267	1.96328	-0.534766	0.143278	18.3875	39.1653	11.9784	35.239	19.0781
	Obs178	Messassi	Messassi	0.0227081	9.20267e-08	0.934715	2.76458e-07	0.0425771	1.69486	1.85183	-0.373385	1.01981	32.2504	57.0827	24.8154	54.8828	30.9932
	Obs179	Messassi	Messassi	0.0418885	1.50563e-06	0.599854	0.00261122	0.355645	1.00997	0.839257	0.83821	-1.80514	46.3741	66.8412	41.0507	51.9245	42.0962
	Obs180	Messassi	Messassi	0.0518528	1.76531e-05	0.80753	8.61186e-05	0.140514	0.698629	1.32707	-0.0508678	0.386985	28.9995	44.97	23.5083	41.8003	27.0057
	Obs181	Messassi	Messassi	0.00662482	1.08876e-07	0.990133	0.00019734	0.00304464	0.991456	2.76191	0.0372611	-2.39234	49.1885	71.2208	39.1745	56.2159	50.7434
	Obs182	Messassi	Messassi	0.382301	0.000714159	0.530308	0.00317618	0.0835006	-0.0999524	1.21339	-0.989066	-0.473832	16.7285	29.2942	16.074	26.3096	19.7712
	Obs183	Messassi	Messassi	0.119917	3.00897e-05	0.855566	0.000425818	0.0240606	0.366042	1.88412	-0.863371	-0.758454	19.1635	35.7443	15.2336	30.4446	22.376
	Obs184	Messassi	Messassi	0.10058	1.8604e-06	0.853701	6.63163e-05	0.0456506	0.983677	1.66988	-0.616164	-0.698758	14.0239	35.8197	9.74663	28.6724	15.6038
	Obs185	Messassi	Messassi	0.0513258	8.26681e-05	0.877212	0.0239857	0.0473937	0.0416811	1.67647	0.128248	-1.93205	28.6553	41.5176	22.9782	30.1768	28.8147
	Obs186	Messassi	Messassi	0.0455413	2.18415e-08	0.896321	1.60959e-07	0.0581374	2.0187	1.67999	-0.569669	0.705417	20.6259	49.7265	14.6665	45.7318	20.1375
	Obs187	Messassi	Messassi	0.00933272	8.04987e-08	0.987683	2.75468e-05	0.00295626	1.15042	2.77141	-0.325921	-1.66102	38.5648	61.8864	29.2411	50.2156	40.864
	Obs188	Messassi	Messassi	0.131982	9.84188e-06	0.762035	0.00590421	0.100069	0.575516	1.30623	-0.101204	-2.03437	27.706	46.7135	24.1993	33.92	28.2596
	Obs189	Messassi	Messassi	0.13379	0.000178539	0.804991	0.0039982	0.057042	0.0584481	1.55304	-0.495269	-0.962345	28.3934	41.6318	24.8043	35.4142	30.0984
	Obs190	Messassi	Messassi	0.00029881	2.63236e-07	0.989141	5.06658e-07	0.0105596	1.16783	2.60502	1.16297	1.5624	54.2939	68.3629	38.0843	67.0534	47.1639
	Obs191	Messassi	Messassi	0.00016939	2.36696e-09	0.981281	7.3767e-07	0.0185489	1.96547	2.38995	1.9172	-0.0461282	40.2862	62.6429	22.9574	51.1591	30.8943
	Obs192	Messassi	Messassi	0.000999078	4.09553e-11	0.997926	1.55552e-10	0.00107485	2.80714	3.31552	-0.510499	1.37207	58.6247	92.6444	44.8115	89.9754	58.4784
	Obs193	Messassi	Messassi	0.000645979	2.75023e-09	0.991548	6.24967e-07	0.00780508	1.90364	2.61179	0.996104	-0.380319	37.9969	62.7306	23.3244	51.8786	33.0134
	Obs194	Messassi	Messassi	0.00238377	5.25795e-08	0.987313	2.74398e-06	0.0103007	1.42553	2.45274	0.4803	-0.181361	56.1294	77.5732	44.0768	69.6635	53.2024
	Obs195	Messassi	Messassi	0.000443011	2.02987e-05	0.99414	0.000326087	0.00507045	0.0586336	2.79975	1.19664	-0.13207	69.2075	75.3735	53.7754	69.8203	64.3323
	Obs196	Messassi	Messassi	0.00650094	8.15448e-09	0.936648	7.51762e-08	0.056851	2.14363	1.81851	0.291193	1.05981	26.18	53.3578	16.2393	48.9152	21.843
	Obs197	Messassi	Messassi	0.000129178	1.57812e-07	0.976389	8.84925e-05	0.0233934	1.04817	2.31195	2.39561	-0.650825	34.2864	47.7015	16.4256	35.0429	23.8884
	Obs198	Messassi	Messassi	0.00104237	2.42026e-09	0.968589	9.94422e-08	0.030368	2.18895	2.13553	1.02675	0.677062	31.6083	57.5545	17.9396	50.1231	24.8645
	Obs199	Messassi	Messassi	0.0015767	1.59866e-08	0.932031	6.27783e-08	0.0663925	2.00409	1.85682	0.931549	1.68298	33.4197	56.4179	20.6557	53.6822	25.9392
	Obs200	Messassi	Messassi	0.332835	2.70378e-05	0.420168	0.000356772	0.246613	0.652177	0.754006	-0.640108	-0.341945	16.5112	35.3475	16.0452	30.1878	17.1109
	Obs201	Messassi	Ebang	0.396631	1.0121e-07	0.345139	6.92104e-07	0.258229	1.88672	0.666066	-1.07872	0.521306	16.6044	46.9671	16.8826	43.122	17.4628
	Centroids:
		F1	F2	F3	F4
	Ebang	0.949033	-0.32864	-1.58461	-0.29532
	Mbankomo	-3.77937	0.0559739	-0.187307	0.539874
	Messassi	1.19661	1.74849	0.216913	0.0465498
	Nkolbissong	-2.53702	-0.139781	0.775694	-1.52893
	Nkometou	1.21726	-0.830854	0.497687	0.178104
	Confusion matrix for the training sample:
	from \ to	Ebang	Mbankomo	Messassi	Nkolbissong	Nkometou	Total	% correct
	Ebang	18	1	9	0	5	33	0.545455
	Mbankomo	0	32	0	3	0	35	0.914286
	Messassi	1	0	40	0	1	42	0.952381
	Nkolbissong	0	4	2	9	1	16	0.5625
	Nkometou	10	1	7	0	57	75	0.76
	Total	29	38	58	12	64	201	0.776119
	Cross-validation: Prior and posterior classification, membership probabilities, scores and squared distances:
	Observation	Prior	Posterior	Ebang	Mbankomo	Messassi	Nkolbissong	Nkometou
	Obs1	Nkometou	Nkometou	0.00123203	1.88283e-06	0.303129	1.44596e-05	0.695623
	Obs2	Nkometou	Messassi	0.00142813	2.94836e-05	0.623967	0.00032169	0.374253
	Obs3	Nkometou	Messassi	0.00366179	4.02379e-07	0.759663	2.23699e-06	0.236673
	Obs4	Nkometou	Messassi	0.00675044	9.61202e-08	0.894703	1.2981e-05	0.0985336
	Obs5	Nkometou	Messassi	0.0167135	5.99887e-09	0.821072	1.54335e-06	0.162212
	Obs6	Nkometou	Nkometou	0.00413678	0.000485765	0.327755	0.00189379	0.665729
	Obs7	Nkometou	Nkometou	0.00639706	1.33676e-06	0.000612476	0.000121415	0.992868
	Obs8	Nkometou	Nkometou	0.000333264	0.000254143	0.000406452	0.00941754	0.989589
	Obs9	Nkometou	Nkometou	0.00285345	2.85254e-05	0.466488	0.000459402	0.530171
	Obs10	Nkometou	Messassi	0.00319029	1.4441e-06	0.677896	2.26476e-05	0.31889
	Obs11	Nkometou	Nkometou	0.0508215	8.42319e-08	0.0013259	1.69077e-05	0.947836
	Obs12	Nkometou	Nkometou	0.01789	6.75918e-06	0.00100516	3.12872e-06	0.981095
	Obs13	Nkometou	Nkometou	0.166364	1.23789e-06	0.0458467	1.20298e-05	0.787776
	Obs14	Nkometou	Ebang	0.634101	6.43883e-06	0.364399	2.25401e-06	0.00149109
	Obs15	Nkometou	Nkometou	0.0150081	7.46821e-08	0.000707832	9.46587e-07	0.984283
	Obs16	Nkometou	Nkometou	0.0608108	3.47553e-08	0.00288139	2.45608e-07	0.936308
	Obs17	Nkometou	Nkometou	0.0623546	1.71143e-07	0.00394619	6.69042e-05	0.933632
	Obs18	Nkometou	Nkometou	0.0684996	4.25752e-08	0.00356684	1.02748e-06	0.927932
	Obs19	Nkometou	Nkometou	0.379088	1.128e-05	0.0675126	0.00595775	0.547431
	Obs20	Nkometou	Nkometou	0.00704479	1.17386e-06	0.000236681	7.35302e-05	0.992644
	Obs21	Nkometou	Nkometou	0.0447255	1.18008e-07	0.00181955	0.000710735	0.952744
	Obs22	Nkometou	Nkometou	0.140511	0.000288805	0.0710399	0.0003475	0.787813
	Obs23	Nkometou	Nkometou	0.133771	4.04482e-05	0.313215	0.000412409	0.552562
	Obs24	Nkometou	Messassi	0.0202031	2.09659e-06	0.568888	7.16265e-05	0.410835
	Obs25	Nkometou	Nkometou	0.0330544	2.61099e-05	0.000417337	0.00358307	0.962919
	Obs26	Nkometou	Nkometou	0.0173664	1.99174e-07	0.376015	1.36781e-06	0.606617
	Obs27	Nkometou	Nkometou	0.0373374	3.97305e-08	0.00084175	2.65819e-05	0.961794
	Obs28	Nkometou	Nkometou	0.00237608	1.80405e-09	0.0247858	2.538e-05	0.972813
	Obs29	Nkometou	Nkometou	0.043282	0.00170637	0.207688	0.037308	0.710016
	Obs30	Nkometou	Nkometou	0.00822629	3.56281e-09	0.00318892	4.98759e-08	0.988585
	Obs31	Nkometou	Nkometou	0.00441042	2.06751e-07	0.00458936	5.80775e-05	0.990942
	Obs32	Nkometou	Nkometou	4.38895e-05	3.50135e-11	0.0001332	4.18943e-09	0.999823
	Obs33	Nkometou	Nkometou	0.00337692	6.3237e-10	0.00182132	3.65721e-08	0.994802
	Obs34	Nkometou	Nkometou	0.0277621	6.78158e-06	0.00336337	7.6269e-05	0.968791
	Obs35	Nkometou	Nkometou	0.0225777	0.000417286	0.0151976	0.0121505	0.949657
	Obs36	Nkometou	Nkometou	0.000816819	1.338e-10	0.00061547	2.92842e-07	0.998567
	Obs37	Nkometou	Nkometou	0.0102566	1.76718e-08	0.0103984	1.65521e-05	0.979328
	Obs38	Nkometou	Nkometou	0.0295368	8.14832e-09	0.0248137	8.26214e-07	0.945649
	Obs39	Nkometou	Nkometou	0.00834165	6.21846e-09	0.00652054	2.89309e-07	0.985138
	Obs40	Nkometou	Nkometou	0.369099	8.5255e-05	0.248374	0.00110462	0.381337
	Obs41	Nkometou	Messassi	0.0863381	8.79701e-07	0.867068	2.38047e-05	0.0465688
	Obs42	Nkometou	Ebang	0.983716	1.0049e-06	0.00267865	0.000141784	0.0134621
	Obs43	Nkometou	Ebang	0.928959	3.60257e-06	0.000764048	8.41238e-05	0.070189
	Obs44	Nkometou	Ebang	0.921245	0.00372586	4.93917e-05	0.00743571	0.0675436
	Obs45	Nkometou	Ebang	0.780784	3.27052e-07	0.215067	9.68829e-06	0.00413888
	Obs46	Nkometou	Nkometou	0.0120917	0.000287841	0.00267018	0.00651757	0.978433
	Obs47	Nkometou	Nkometou	0.146615	2.58402e-12	0.139283	6.19163e-07	0.714102
	Obs48	Nkometou	Nkometou	0.0212437	2.40159e-14	0.00824187	8.54827e-10	0.970514
	Obs49	Nkometou	Nkometou	0.0735794	1.17503e-07	0.0429228	2.75876e-05	0.88347
	Obs50	Nkometou	Nkometou	0.0485044	5.36196e-08	0.335886	0.00257084	0.613039
	Obs51	Nkometou	Nkometou	0.0493989	1.4719e-08	0.0137756	2.83268e-05	0.936797
	Obs52	Nkometou	Nkometou	0.00574946	3.66492e-05	0.00174465	4.18481e-05	0.992427
	Obs53	Nkometou	Nkometou	0.0264792	1.09513e-06	0.0148786	0.000143676	0.958497
	Obs54	Nkometou	Nkometou	0.000274081	0.0226387	0.000277838	0.113884	0.862925
	Obs55	Nkometou	Nkometou	0.000675447	2.75563e-10	0.00184465	4.41952e-06	0.997475
	Obs56	Nkometou	Nkometou	0.0586402	1.48268e-08	0.0920164	5.58958e-07	0.849343
	Obs57	Nkometou	Ebang	0.916039	5.7957e-07	0.0787151	2.29188e-07	0.00524493
	Obs58	Nkometou	Nkometou	0.00493558	2.70465e-06	0.00344948	2.87596e-05	0.991583
	Obs59	Nkometou	Ebang	0.679616	0.000317937	0.00428411	0.0168859	0.298896
	Obs60	Nkometou	Nkometou	0.00269659	1.26319e-09	0.00613858	4.621e-09	0.991165
	Obs61	Nkometou	Ebang	0.566857	0.000358525	0.404004	0.00055162	0.0282293
	Obs62	Nkometou	Nkometou	0.0377589	1.49082e-09	0.0199239	7.49706e-08	0.942317
	Obs63	Nkometou	Ebang	0.87476	1.61484e-07	0.000180619	8.51782e-08	0.125059
	Obs64	Nkometou	Nkometou	0.001492	8.26638e-10	0.000775104	8.43258e-08	0.997733
	Obs65	Nkometou	Nkometou	0.211277	4.36612e-08	0.000671485	4.28149e-07	0.788051
	Obs66	Nkometou	Nkometou	0.00630132	8.79503e-08	0.0104388	1.89584e-05	0.983241
	Obs67	Nkometou	Ebang	0.523035	1.66904e-05	0.00149725	0.000199206	0.475252
	Obs68	Nkometou	Nkometou	0.0153938	3.72028e-09	0.00620089	9.87271e-07	0.978404
	Obs69	Nkometou	Ebang	0.981255	6.41739e-06	0.00133207	1.19416e-05	0.0173944
	Obs70	Nkometou	Nkometou	0.00806161	1.74271e-08	0.0100547	7.31359e-06	0.981876
	Obs71	Nkometou	Messassi	0.195381	9.24049e-05	0.661128	0.000115558	0.143283
	Obs72	Nkometou	Nkometou	0.0192443	7.04178e-08	0.0200022	2.0619e-06	0.960751
	Obs73	Nkometou	Nkometou	0.232641	3.97519e-06	0.0637158	1.37544e-05	0.703626
	Obs74	Nkometou	Nkometou	0.0183464	3.08547e-08	0.0270449	5.4906e-07	0.954608
	Obs75	Nkometou	Mbankomo	1.30469e-07	0.996061	3.57323e-08	0.00393926	4.76418e-08
	Obs76	Ebang	Messassi	0.0662065	2.40107e-05	0.784486	5.63665e-05	0.149227
	Obs77	Ebang	Ebang	0.917865	1.39032e-05	0.00250694	3.17739e-05	0.0795826
	Obs78	Ebang	Ebang	0.675688	4.85696e-06	0.00236491	0.000150572	0.321792
	Obs79	Ebang	Nkometou	0.357301	1.99046e-08	0.00109795	5.68413e-07	0.641601
	Obs80	Ebang	Nkometou	0.482061	3.15521e-07	0.000186732	2.50014e-07	0.517752
	Obs81	Ebang	Messassi	0.417733	0.000645724	0.527821	0.000750299	0.0530497
	Obs82	Ebang	Ebang	0.569441	0.000703831	0.00877718	0.020268	0.40081
	Obs83	Ebang	Messassi	0.143392	0.000303023	0.837725	0.000812669	0.0177667
	Obs84	Ebang	Messassi	0.0861197	0.0833466	0.66777	0.0346068	0.128157
	Obs85	Ebang	Messassi	0.236057	4.81012e-06	0.717048	1.32151e-06	0.0468888
	Obs86	Ebang	Nkometou	0.345254	6.68309e-05	0.000582291	7.05068e-05	0.654026
	Obs87	Ebang	Ebang	0.648024	9.03596e-10	0.000663417	1.32509e-08	0.351312
	Obs88	Ebang	Ebang	0.866634	5.17703e-06	0.000509941	0.0001197	0.132731
	Obs89	Ebang	Nkometou	0.310956	2.38418e-07	0.0151008	3.62534e-05	0.673907
	Obs90	Ebang	Nkometou	0.0182078	3.25191e-06	0.0190603	1.98485e-05	0.962709
	Obs91	Ebang	Messassi	0.0481533	3.3821e-05	0.863719	0.00016363	0.0879301
	Obs92	Ebang	Ebang	0.878186	4.88991e-05	0.00336722	0.000245141	0.118152
	Obs93	Ebang	Ebang	0.80803	1.58043e-05	0.00148828	0.000103661	0.190362
	Obs94	Ebang	Nkometou	0.113102	6.60725e-08	0.000318817	4.34561e-05	0.886536
	Obs95	Ebang	Nkometou	0.397621	1.1222e-06	0.000206878	1.84872e-06	0.602169
	Obs96	Ebang	Nkometou	0.265073	3.54271e-07	0.00356016	7.48418e-05	0.731292
	Obs97	Ebang	Nkometou	0.29896	1.47662e-07	0.0249627	3.05211e-07	0.676077
	Obs98	Ebang	Nkometou	0.346734	1.9835e-07	0.0391499	1.70155e-06	0.614115
	Obs99	Ebang	Ebang	0.646371	2.95883e-08	0.101394	1.13836e-06	0.252234
	Obs100	Ebang	Ebang	0.57375	2.63019e-07	0.056694	9.32783e-05	0.369462
	Obs101	Ebang	Messassi	0.000830255	8.02833e-07	0.994361	0.00142598	0.00338173
	Obs102	Ebang	Messassi	0.0197158	1.05971e-08	0.974461	9.45616e-08	0.00582345
	Obs103	Ebang	Messassi	0.0105267	6.89288e-11	0.989245	2.93035e-10	0.000228228
	Obs104	Ebang	Messassi	0.00815306	1.9015e-08	0.985938	8.80897e-06	0.0059002
	Obs105	Ebang	Ebang	0.99985	1.62583e-12	2.20905e-05	9.10367e-10	0.000128108
	Obs106	Ebang	Nkolbissong	0.167319	0.295368	8.06042e-05	0.535786	0.00144585
	Obs107	Ebang	Ebang	0.999898	7.37408e-13	1.89303e-05	4.62772e-13	8.34607e-05
	Obs108	Ebang	Mbankomo	5.89495e-08	0.999702	1.50641e-08	0.000286743	1.08405e-05
	Obs109	Mbankomo	Ebang	0.794055	0.0463588	0.000410825	0.000791716	0.158384
	Obs110	Mbankomo	Ebang	0.686202	0.17181	0.133863	5.13023e-05	0.00807337
	Obs111	Mbankomo	Mbankomo	2.09783e-08	0.998694	1.98535e-09	0.00130644	1.10533e-08
	Obs112	Mbankomo	Mbankomo	1.16728e-07	0.998205	8.48921e-09	0.00179514	3.34053e-08
	Obs113	Mbankomo	Mbankomo	1.98726e-08	0.999324	3.01041e-10	0.000675963	2.33387e-09
	Obs114	Mbankomo	Mbankomo	0.0331386	0.563741	0.00788912	0.376531	0.0187006
	Obs115	Mbankomo	Mbankomo	2.8802e-07	0.988844	1.59934e-07	0.0111547	5.74473e-07
	Obs116	Mbankomo	Mbankomo	4.14343e-06	0.979775	9.10695e-07	0.0202145	5.30112e-06
	Obs117	Mbankomo	Mbankomo	1.56853e-06	0.989722	6.20703e-07	0.0102741	1.88972e-06
	Obs118	Mbankomo	Mbankomo	1.05813e-06	0.99005	5.78072e-07	0.00994708	1.38397e-06
	Obs119	Mbankomo	Mbankomo	9.87568e-07	0.967178	3.21364e-07	0.0328133	7.11357e-06
	Obs120	Mbankomo	Mbankomo	0.00170319	0.742738	0.000251009	0.251844	0.00346306
	Obs121	Mbankomo	Mbankomo	8.40285e-05	0.987819	1.88817e-06	0.012083	1.18488e-05
	Obs122	Mbankomo	Nkolbissong	5.67755e-06	0.0129054	1.40484e-05	0.987068	6.42807e-06
	Obs123	Mbankomo	Nkolbissong	5.18133e-08	0.00183402	5.05681e-07	0.998162	3.21788e-06
	Obs124	Mbankomo	Nkolbissong	4.5591e-07	0.00469079	1.62877e-06	0.9953	6.73213e-06
	Obs125	Mbankomo	Mbankomo	1.17677e-06	0.991077	6.51522e-07	0.00891989	1.52154e-06
	Obs126	Mbankomo	Mbankomo	1.17634e-06	0.989393	5.75545e-07	0.0106035	1.61099e-06
	Obs127	Mbankomo	Mbankomo	1.12253e-05	0.982434	5.52036e-06	0.0175274	2.14665e-05
	Obs128	Mbankomo	Mbankomo	1.12017e-06	0.990588	6.39315e-07	0.00940897	1.47164e-06
	Obs129	Mbankomo	Mbankomo	1.28399e-06	0.991649	4.78278e-07	0.00834823	1.48822e-06
	Obs130	Mbankomo	Mbankomo	1.83383e-06	0.989873	7.09025e-07	0.0101223	2.21714e-06
	Obs131	Mbankomo	Mbankomo	2.8882e-09	0.961991	1.9323e-09	0.0380083	5.72307e-07
	Obs132	Mbankomo	Mbankomo	9.67312e-07	0.990191	5.71036e-07	0.00980615	1.30252e-06
	Obs133	Mbankomo	Mbankomo	8.40891e-07	0.993003	4.48416e-07	0.00699438	9.89419e-07
	Obs134	Mbankomo	Mbankomo	0.000142512	0.943242	1.35849e-05	0.0564802	0.000122029
	Obs135	Mbankomo	Mbankomo	3.69199e-06	0.983509	8.62039e-07	0.0164819	4.56422e-06
	Obs136	Mbankomo	Mbankomo	8.48171e-05	0.856265	4.92007e-06	0.143575	7.03702e-05
	Obs137	Mbankomo	Mbankomo	3.24329e-06	0.986063	8.5974e-07	0.0139285	3.92351e-06
	Obs138	Mbankomo	Mbankomo	1.51216e-06	0.990414	6.94471e-07	0.00958237	1.8872e-06
	Obs139	Mbankomo	Mbankomo	2.09694e-06	0.989783	7.58933e-07	0.0102117	2.57406e-06
	Obs140	Mbankomo	Mbankomo	1.5142e-06	0.99015	6.21862e-07	0.0098462	1.87552e-06
	Obs141	Mbankomo	Mbankomo	1.62116e-06	0.990334	6.86193e-07	0.00966129	1.99643e-06
	Obs142	Mbankomo	Mbankomo	1.03421e-06	0.990251	6.83586e-07	0.00974602	1.35813e-06
	Obs143	Mbankomo	Mbankomo	1.16799e-06	0.990831	6.03392e-07	0.00916535	1.49225e-06
	Obs144	Nkolbissong	Mbankomo	1.09039e-06	0.998193	3.06657e-07	0.001805	1.07057e-06
	Obs145	Nkolbissong	Mbankomo	1.38763e-06	0.996807	5.38479e-07	0.00318946	1.44952e-06
	Obs146	Nkolbissong	Mbankomo	5.101e-12	0.998513	3.45546e-12	0.00148689	1.50211e-10
	Obs147	Nkolbissong	Mbankomo	2.78965e-07	0.99912	1.92788e-07	0.000879668	3.28193e-07
	Obs148	Nkolbissong	Messassi	0.463467	8.32338e-05	0.524223	0.00150482	0.0107219
	Obs149	Nkolbissong	Nkometou	0.298747	1.65701e-05	0.0142833	0.0681677	0.618785
	Obs150	Nkolbissong	Nkolbissong	1.41295e-05	0.285182	1.134e-08	0.714781	2.329e-05
	Obs151	Nkolbissong	Nkolbissong	6.70542e-05	0.302188	5.60214e-08	0.697507	0.000238439
	Obs152	Nkolbissong	Nkolbissong	1.14564e-06	0.127254	3.68335e-05	0.872459	0.000249235
	Obs153	Nkolbissong	Nkolbissong	0.00191673	0.00162295	0.0502533	0.855228	0.0909789
	Obs154	Nkolbissong	Nkolbissong	1.63234e-07	0.0121499	3.19449e-06	0.987829	1.80038e-05
	Obs155	Nkolbissong	Nkolbissong	3.94788e-06	0.0639863	8.19107e-06	0.935985	1.63813e-05
	Obs156	Nkolbissong	Nkolbissong	1.41123e-05	0.00999767	0.000124496	0.9898	6.32458e-05
	Obs157	Nkolbissong	Nkolbissong	3.61016e-06	0.0463273	6.84035e-05	0.953574	2.6974e-05
	Obs158	Nkolbissong	Messassi	0.0140208	3.62001e-05	0.635319	3.65356e-05	0.350588
	Obs159	Nkolbissong	Nkometou	0.0212635	5.56401e-08	0.00132648	8.21098e-07	0.977409
	Obs160	Messassi	Ebang	0.604187	3.68344e-06	0.243898	0.000865388	0.151046
	Obs161	Messassi	Nkometou	0.00826705	8.5088e-07	0.489821	8.39868e-06	0.501902
	Obs162	Messassi	Messassi	0.00529062	4.68737e-05	0.933425	0.000296669	0.0609404
	Obs163	Messassi	Messassi	0.00782632	6.86587e-08	0.887894	6.90911e-07	0.104279
	Obs164	Messassi	Messassi	0.0189693	1.02671e-07	0.881581	9.19849e-06	0.0994401
	Obs165	Messassi	Messassi	0.123542	1.76611e-09	0.788924	6.27266e-07	0.0875328
	Obs166	Messassi	Messassi	0.0204143	0.000196851	0.788162	0.000842419	0.190385
	Obs167	Messassi	Messassi	0.0517621	4.67182e-06	0.873215	0.000137612	0.0748805
	Obs168	Messassi	Messassi	0.00101728	0.00114397	0.516706	0.00789415	0.473239
	Obs169	Messassi	Messassi	0.0077977	2.25702e-05	0.803446	0.000309245	0.188425
	Obs170	Messassi	Messassi	0.00552679	5.77253e-07	0.899348	7.32956e-06	0.0951169
	Obs171	Messassi	Messassi	0.106487	3.03437e-07	0.805603	9.93535e-06	0.0878997
	Obs172	Messassi	Messassi	0.0109447	2.27859e-07	0.832962	3.45049e-07	0.156093
	Obs173	Messassi	Nkometou	0.0184415	1.58686e-07	0.0737936	8.67654e-07	0.907764
	Obs174	Messassi	Ebang	0.644364	0.000796898	0.0622564	7.67354e-05	0.292506
	Obs175	Messassi	Messassi	0.0401374	2.04605e-07	0.890099	2.61723e-07	0.0697631
	Obs176	Messassi	Messassi	0.0872229	3.15832e-08	0.779398	5.53026e-08	0.133379
	Obs177	Messassi	Messassi	0.0494979	1.58543e-06	0.917927	1.05513e-05	0.0325632
	Obs178	Messassi	Messassi	0.0419681	1.33396e-07	0.885837	2.98111e-07	0.0721947
	Obs179	Messassi	Nkometou	0.0689277	2.52256e-06	0.215163	0.0111417	0.704765
	Obs180	Messassi	Messassi	0.0898862	3.97209e-05	0.675042	0.000164126	0.234868
	Obs181	Messassi	Messassi	0.016186	2.25342e-07	0.978232	0.00107457	0.00450672
	Obs182	Messassi	Ebang	0.505178	0.00113703	0.394493	0.00473306	0.0944587
	Obs183	Messassi	Messassi	0.175796	5.03849e-05	0.793791	0.000686672	0.0296755
	Obs184	Messassi	Messassi	0.123133	2.35602e-06	0.823958	8.32753e-05	0.0528233
	Obs185	Messassi	Messassi	0.0900021	0.000213766	0.764719	0.0736329	0.0714323
	Obs186	Messassi	Messassi	0.0640849	2.42383e-08	0.859015	1.60534e-07	0.0768996
	Obs187	Messassi	Messassi	0.0181946	1.28468e-07	0.977891	6.63321e-05	0.00384806
	Obs188	Messassi	Messassi	0.241665	2.015e-05	0.588602	0.0160305	0.153682
	Obs189	Messassi	Messassi	0.259353	0.000512483	0.642852	0.0112778	0.0860044
	Obs190	Messassi	Messassi	0.000344134	6.50286e-07	0.979048	7.0034e-07	0.0206065
	Obs191	Messassi	Messassi	0.000168117	2.12493e-09	0.971666	9.29524e-07	0.0281648
	Obs192	Messassi	Messassi	0.00171632	8.45487e-12	0.997006	1.73009e-11	0.00127723
	Obs193	Messassi	Messassi	0.000772278	2.53024e-09	0.988411	7.77978e-07	0.0108155
	Obs194	Messassi	Messassi	0.00510822	9.93284e-08	0.971941	6.48606e-06	0.0229444
	Obs195	Messassi	Messassi	0.0006482	0.000372793	0.982405	0.00530669	0.0112672
	Obs196	Messassi	Messassi	0.0085842	8.49085e-09	0.911894	7.07256e-08	0.0795219
	Obs197	Messassi	Messassi	0.000124611	2.14904e-07	0.968381	0.000147414	0.0313467
	Obs198	Messassi	Messassi	0.00123111	2.24394e-09	0.955902	9.68e-08	0.0428667
	Obs199	Messassi	Messassi	0.0019633	1.78931e-08	0.892618	5.59611e-08	0.105419
	Obs200	Messassi	Ebang	0.41809	3.68236e-05	0.296282	0.000466219	0.285125
	Obs201	Messassi	Ebang	0.487459	9.53301e-08	0.223942	5.82542e-07	0.288599
	Confusion matrix for the cross-validation results:
	from \ to	Ebang	Mbankomo	Messassi	Nkolbissong	Nkometou	Total	% correct
	Ebang	11	1	10	1	10	33	0.333333
	Mbankomo	2	30	0	3	0	35	0.857143
	Messassi	5	0	34	0	3	42	0.809524
	Nkolbissong	0	4	2	8	2	16	0.5
	Nkometou	11	1	8	0	55	75	0.733333
	Total	29	36	54	12	70	201	0.686567

[truncated: 22 more sheets: XLSTAT_20220714_121022_1_HID2, XLSTAT_20220714_121022_1_HID1, XLSTAT_20220714_121022_1_HID, PCA, XLSTAT_20220714_115916_1_HID3, XLSTAT_20220714_115916_1_HID2, XLSTAT_20220714_115916_1_HID1, XLSTAT_20220714_115916_1_HID, Correlation tests, Hypotrigona, AHC1, XLSTAT_20220714_135157_1_HID, DA1, XLSTAT_20220714_135000_1_HID2, XLSTAT_20220714_135000_1_HID1, XLSTAT_20220714_135000_1_HID, PCA1, XLSTAT_20220714_134407_1_HID3, XLSTAT_20220714_134407_1_HID2, XLSTAT_20220714_134407_1_HID1 …]
